# Supplementary material for: Stress conditions promote Leishmania hybridization in vitro marked by expression of the ancestral gamete fusogen HAP2 as revealed by single-cell RNA-seq
Source: eLife. 2022 Jan 7;11:e73488. doi: 10.7554/eLife.73488 (PMC8794473; doi:10.7554/eLife.73488)
Supplement: Figure 1—source data 1. [file elife-73488-fig1-data1.xls]

## Sheet: Irrad_vs_control
untreated(% of positive wells)	+irradiation(% of positive wells)
2.4	96.4
0	44
1.2	40.5
1.2	73.8

## Sheet: MMS_vs_control
untreated(% of positive wells)	+MMS(% of positive wells)
1.2	7.1
1.2	40.4
0	61.9
7.1	28.6

## Sheet: H2O2_vs_control
untreated(% of positive wells)	+H2O2(% of positive wells)
0	61.9
3.6	29.8
2.4	13.1
0	2.4
