# Supplementary material for: Stress conditions promote Leishmania hybridization in vitro marked by expression of the ancestral gamete fusogen HAP2 as revealed by single-cell RNA-seq
Source: eLife. 2022 Jan 7;11:e73488. doi: 10.7554/eLife.73488 (PMC8794473; doi:10.7554/eLife.73488)
Supplement: Figure 6—source data 1. [file elife-73488-fig6-data1.xls]

## Sheet:  MA37-mNG+ cells-HAP2-NG-IRRAD
days p.i.	untreated	untreated	untreated	untreated	irradiated	irradiated	irradiated	irradiated
0	5.37	15.5	0.57	2.63	4.4	13.9	0.89	2.83
1	46.6	27	27.6	30.2	28.1	38.7	28.8	20.3
2	10.6	2.58	0.93	4.24	48.9	28.7	45.6	40.3
3	2.79		0.53	1.2	14.3		2.59	4.79
4	0.97	0.98	0.61	1.54	3.54	4.32	2.16	2.78
5	0.81	0.22	0.3	0.74	1.56	3.01	1.77	2.21

## Sheet: L747-mNG+ cells-HAP2-IRRAD
days	L747 Hap2-NG untreated	L747 Hap2-NG untreated	L747 Hap2-NG untreated	L747 Hap2-NG irrad	L747 Hap2-NG irrad	L747 Hap2-NG irrad
0	0.79	2.73	2.16	0.93	2.49	2.4
1	2.63	0.3	6.34		19.1	27.7
2	2.86	1.43	1.72	4.08	5.31	6.21
3		2.32	1.41		3.8	5.6

## Sheet: MA37-mNG+ cells-HAP2-H2O2
days p.i.	untreated	untreated	untreated	H2O2	H2O2	H2O2
0	2.25	4.72	0.6	3.54	5.14	0.4
1	64.6	38.8	21.6	44.3	58.7	35.8
2	19.9	6.41	8.7	64.6	25.1	41.6
3	3.41	4.53	2.8	15.8	12.3	18.1
4		2.89	2.27		7.12	5.58
5	2.28	3.5	0.73	5.25	5.76	2.51

## Sheet: L747-mNG+ cells-HAP2-H2O2
days p.i.	untreated	untreated	untreated	H2O2	H2O2	H2O2
0	2.67	2.2	1.97	2.9	1.31	2.29
1	5.81	3.34	4.45		13.5	12.3
2	2.34	2.05	1.19	5.96	4.55	4.42
3	1.96	1.89	1.25	5.38	5.31	5.05
4	2.39	1.6	1.02	6.44	3.37	2.04
5	1.43	1.81		2.35	1.94

## Sheet: MA37-mNG+ cells-HAP2-MMS
days p.i.	untreated	untreated	untreated	MMS	MMS	MMS
0	5.35	8.59	1.07	4.63	7.52	0.87
1		25.1	11.6	15.7	32.7
2	0.69	0.68	0.83	29.3	28.6	18.1
3	2.13	0.38	0.08	41	23	20.6
4		0.31	0.03		3.57	19.3
5	1.32	0	0.05	7.81	0.78	10.5

## Sheet: L747-mNG+ cells-HAP2-MMS
days p.i.	untreated	untreated	untreated	MMS	MMS	MMS
0	3.17	1.43	3.51	3.27	1.49	3.17
1	1.56	1.67	1.78	49.1	57.5	73.9
2	0.8	0.7	0.43	21.8	38.1	32.3
3	2.05	1.03	0.8	12.9	8.06	7.55
4	1.37	1.14	1.75	7.8	6.73	7.81
5	3.25	3.91		6.65	5.45
