# Supplementary material for: Stress conditions promote Leishmania hybridization in vitro marked by expression of the ancestral gamete fusogen HAP2 as revealed by single-cell RNA-seq
Source: eLife. 2022 Jan 7;11:e73488. doi: 10.7554/eLife.73488 (PMC8794473; doi:10.7554/eLife.73488)
Supplement: Figure 6—source data 2. [file elife-73488-fig6-data2.xls]

## Sheet: sorted_mNGHAP2_%positive wells
L747-mNG+ x MA37-mNG+ (% of positive wells)	L747-mNG- x MA37-mNG+ (% of positive wells)	L747-mNG+ x MA37-mNG- (% of positive wells)	L747-mNG- x MA37-mNG- (% of positive wells)
32.6	23.9	13	0
36.7	3.3	3.3	0

## Sheet: L747_min_freq_hyb_competent
L747-mNG+ x MA37-mNG+ (L747 min. freq. of mating competent cells)	L747-mNG- x MA37-mNG+ (L747 min. freq. of mating competent cells)	L747-mNG+ x MA37-mNG- (L747 min. freq. of mating competent cells)	L747-mNG- x MA37-mNG- (L747 min. freq. of mating competent cells)
6.5218e-06	4.7827e-06	2.6088e-06	1.5e-10
8.3619e-06	7.6e-07	7.6e-07	1e-10

## Sheet: MA37_min_freq_hyb_competent
L747-mNG+ x MA37-mNG+ (MA37 min. freq. of mating competent cells)	L747-mNG- x MA37-mNG+ (MA37 min. freq. of mating competent cells)	L747-mNG+ x MA37-mNG- (MA37 min. freq. of mating competent cells)	L747-mNG- x MA37-mNG- (MA37 min. freq. of mating competent cells)
6.52184e-06	4.78271e-06	2.6088e-06	1e-10
1.22223e-05	1.11121e-06	1.11121e-06	1.5e-10
