# Supplementary material for: Stress conditions promote Leishmania hybridization in vitro marked by expression of the ancestral gamete fusogen HAP2 as revealed by single-cell RNA-seq
Source: eLife. 2022 Jan 7;11:e73488. doi: 10.7554/eLife.73488 (PMC8794473; doi:10.7554/eLife.73488)
Supplement: Supplementary file 2. [file elife-73488-supp2.xls]

## Sheet: Integrated_untreated_markers
Supplementary Table 2. Differentially expressed genes for each of the nine cell clusters identified in integrated untreated L747 and MA37 scRNA-seq data (after using FindIntegrationAnchors and IntegrateData commands) according to FindAllMarkers function in Seurat R package, with the following cutoff values: percentage of cells within a cluster expressing a given gene > 10%, |log2FC > 0.1| and Wil…
Untreated_LMA_cluster_ID	Cluster_representation_in_L747(%)	Cluster_representation_in_MA37(%)	Gene_ID	Avg_log2FC	P_value	P_val_adj	Pct.1	Pct.2	Product_Description	Computed_GO_Functions
0	34.6625	1.82688	LmjF.36.3220	0.838315	7.49135e-06	0.0149827	0.297	0.486	hypothetical protein, conserved	N/A
0	34.6625	1.82688	LmjF.13.0690	0.733561	1.03637e-06	0.00207273	0.355	0.545	PSP1 C-terminal conserved region, putative	N/A
0	34.6625	1.82688	LmjF.32.3790	0.697177	1.26692e-34	2.53385e-31	0.287	0.371	cyclin-dependent kinase regulatory subunit	cyclin-dependent protein serine/threonine kinase regulator activity
0	34.6625	1.82688	LmjF.30.1370	0.623851	3.28744e-69	6.57488e-66	0.264	0.531	PSP1 C-terminal conserved region, putative	N/A
0	34.6625	1.82688	LmjF.24.0290	0.618957	3.40021e-12	6.80041e-09	0.193	0.401	NLI interacting factor-like phosphatase, putative	N/A
0	34.6625	1.82688	LmjF.27.0430	0.58808	2.37988e-16	4.75976e-13	0.23	0.448	hypothetical protein, conserved	N/A
0	34.6625	1.82688	LmjF.36.5820	0.578478	1.31627e-78	2.63254e-75	0.214	0.276	mkiaa0324 protein-like protein	N/A
0	34.6625	1.82688	LmjF.15.1490	0.557701	8.80392e-15	1.76078e-11	0.273	0.384	hypothetical protein, conserved	N/A
0	34.6625	1.82688	LmjF.33.3240	0.514174	3.23857e-91	6.47714e-88	0.414	0.422	h1 histone-like protein	N/A
0	34.6625	1.82688	LmjF.35.1100	0.501204	3.24716e-42	6.49433e-39	0.196	0.442	hypothetical protein, conserved	N/A
0	34.6625	1.82688	LmjF.29.0850	0.488167	2.53836e-20	5.07671e-17	0.392	0.484	High mobility group protein TDP1	N/A
0	34.6625	1.82688	LmjF.26.2210	0.472427	1.05362e-57	2.10724e-54	0.158	0.421	AAA ATPase domain containing protein, putative	N/A
0	34.6625	1.82688	LmjF.22.0120	0.45752	1.40692e-177	2.81385e-174	0.145	0.473	hypothetical protein, conserved	N/A
0	34.6625	1.82688	LmjF.22.0660	0.457445	2.87246e-91	5.74491e-88	0.247	0.529	glucoamylase-like protein	N/A
0	34.6625	1.82688	LmjF.02.0610	0.451888	6.74149e-47	1.3483e-43	0.103	0.229	hypothetical protein, conserved	N/A
0	34.6625	1.82688	LmjF.35.4550	0.444894	1.06219e-50	2.12439e-47	0.245	0.325	hypothetical protein, conserved	protein binding
0	34.6625	1.82688	LmjF.36.4190	0.439479	2.54964e-33	5.09928e-30	0.178	0.419	GINS complex protein, putative	N/A
0	34.6625	1.82688	LmjF.35.2570	0.423008	5.03689e-38	1.00738e-34	0.2	0.452	hypothetical protein, conserved	N/A
0	34.6625	1.82688	LmjF.31.0070	0.421096	1.27551e-142	2.55102e-139	0.154	0.205	helicase-like protein	ATP binding;DNA binding;hydrolase activity
0	34.6625	1.82688	LmjF.35.0380	0.419955	1.38753e-49	2.77506e-46	0.225	0.479	thioredoxin, putative	N/A
0	34.6625	1.82688	LmjF.10.0870	0.41099	2.6967e-19	5.39339e-16	0.326	0.548	histone H3	DNA binding;protein heterodimerization activity
0	34.6625	1.82688	LmjF.07.0040	0.398979	4.53607e-138	9.07214e-135	0.125	0.435	hypothetical protein, conserved	N/A
0	34.6625	1.82688	LmjF.28.0550	0.388591	8.47074e-10	1.69415e-06	0.179	0.327	DNA repair protein RAD51, putative	ATP binding;DNA binding;DNA-dependent ATPase activity;double-stranded DNA binding;nucleotide binding;recombinase activity;single-stranded DNA binding
0	34.6625	1.82688	LmjF.25.0920	0.385964	7.43892e-11	1.48778e-07	0.148	0.364	Histone RNA hairpin-binding protein RNA-binding domain containing protein, putative	RNA binding;mRNA binding
0	34.6625	1.82688	LmjF.33.0650	0.385932	6.80505e-09	1.36101e-05	0.248	0.379	hypothetical protein, conserved	N/A
0	34.6625	1.82688	LmjF.05.0580	0.385171	6.49145e-18	1.29829e-14	0.216	0.442	hypothetical protein, conserved	N/A
0	34.6625	1.82688	LmjF.27.0020	0.370195	7.72209e-113	1.54442e-109	0.187	0.488	Meckelin (Transmembrane protein 67), putative	N/A
0	34.6625	1.82688	LmjF.09.1100	0.368146	1.02086e-28	2.04173e-25	0.2	0.442	hypothetical protein, conserved	N/A
0	34.6625	1.82688	LmjF.25.1780	0.366025	5.44022e-09	1.08804e-05	0.196	0.406	ATP-grasp domain containing protein, putative	ATP binding;D-alanine-D-alanine ligase activity;metal ion binding;protein binding
0	34.6625	1.82688	LmjF.27.0350	0.365115	1.04313e-10	2.08626e-07	0.297	0.498	RNA recognition motif (a.k.a. RRM, RBD, or RNP domain), putative	nucleic acid binding
0	34.6625	1.82688	LmjF.31.0730	0.363137	7.06832e-12	1.41366e-08	0.265	0.392	hypothetical protein, unknown function	N/A
0	34.6625	1.82688	LmjF.28.0210	0.362975	2.49414e-67	4.98828e-64	0.242	0.314	Histone H2B variant V	DNA binding;protein heterodimerization activity
0	34.6625	1.82688	LmjF.10.0120	0.358374	9.92829e-11	1.98566e-07	0.139	0.361	PSP1 C-terminal conserved region, putative	N/A
0	34.6625	1.82688	LmjF.32.1130	0.354514	1.06983e-16	2.13965e-13	0.171	0.398	hypothetical protein, conserved	N/A
0	34.6625	1.82688	LmjF.28.0850	0.352647	1.22806e-46	2.45613e-43	0.249	0.504	DNA replication licensing factor MCM2, putative	ATP binding;DNA binding
0	34.6625	1.82688	LmjF.17.0430	0.323833	3.99122e-06	0.00798245	0.181	0.386	hypothetical protein, conserved	N/A
0	34.6625	1.82688	LmjF.09.0400	0.32025	1.55712e-25	3.11424e-22	0.274	0.509	kinetoplastid kinetochore protein 10, putative	ATP binding;protein kinase activity
0	34.6625	1.82688	LmjF.20.1365	0.317812	5.23884e-206	1.04777e-202	0.154	0.498	pumillio protein 9, putative	RNA binding
0	34.6625	1.82688	LmjF.32.3780	0.315751	2.59691e-57	5.19382e-54	0.106	0.225	kinetoplast-associated protein 3, putative	N/A
0	34.6625	1.82688	LmjF.36.2800	0.313703	2.42052e-110	4.84103e-107	0.116	0.421	hypothetical protein, conserved	N/A
0	34.6625	1.82688	LmjF.24.2320	0.306225	1.55036e-52	3.10071e-49	0.363	0.638	mitogen-activated protein kinase kinase 4, putative	ATP binding;protein kinase activity
0	34.6625	1.82688	LmjF.07.0790	0.306194	1.14938e-08	2.29877e-05	0.151	0.308	hypothetical protein, conserved	N/A
0	34.6625	1.82688	LmjF.26.0330	0.305	7.33571e-10	1.46714e-06	0.101	0.269	mitotic cyclin, putative	N/A
0	34.6625	1.82688	LmjF.31.2750	0.296704	1.95173e-14	3.90346e-11	0.139	0.293	kinetoplastid kinetochore protein 8, putative	N/A
0	34.6625	1.82688	LmjF.23.0760	0.296574	6.96068e-78	1.39214e-74	0.108	0.393	mitochondrial RNA binding protein, putative	N/A
0	34.6625	1.82688	LmjF.23.0960	0.290928	1.54626e-72	3.09251e-69	0.151	0.429	hypothetical protein, conserved	N/A
0	34.6625	1.82688	LmjF.18.1180	0.289861	6.55551e-23	1.3111e-19	0.167	0.4	hypothetical protein, conserved	N/A
0	34.6625	1.82688	LmjF.35.2030	0.287902	7.33211e-19	1.46642e-15	0.174	0.402	hypothetical protein, unknown function	calcium ion binding
0	34.6625	1.82688	LmjF.35.3440	0.282471	4.391e-137	8.78199e-134	0.19	0.503	replication factor A protein 3, putative	DNA binding
0	34.6625	1.82688	LmjF.30.2550	0.282174	2.92388e-131	5.84776e-128	0.155	0.467	heat shock 70-related protein 1, mitochondrial precursor, putative	ATP binding;unfolded protein binding
0	34.6625	1.82688	LmjF.35.1650	0.282166	8.97459e-44	1.79492e-40	0.101	0.23	hypothetical protein, conserved	N/A
0	34.6625	1.82688	LmjF.09.0100	0.278948	8.26146e-09	1.65229e-05	0.176	0.393	flagellar pocket cytoskeletal protein bilbo1	calcium ion binding
0	34.6625	1.82688	LmjF.13.0080	0.272859	1.07463e-32	2.14925e-29	0.215	0.327	mitochondrial DNA polymerase I protein B, putative	DNA binding;DNA-directed DNA polymerase activity;nucleic acid binding
0	34.6625	1.82688	LmjF.30.2520	0.269053	1.9358e-05	0.038716	0.121	0.339	hypothetical protein, conserved	protein binding
0	34.6625	1.82688	LmjF.29.2420	0.264387	4.14298e-131	8.28597e-128	0.151	0.463	hypothetical protein, conserved	N/A
0	34.6625	1.82688	LmjF.33.2720	0.262822	3.83778e-214	7.67557e-211	0.162	0.511	3-oxoacyl-acyl carrier protein synthase ii, putative	transferase activity, transferring acyl groups
0	34.6625	1.82688	LmjF.36.3810	0.261959	8.81561e-35	1.76312e-31	0.138	0.266	aminomethyltransferase, mitochondrial, putative	aminomethyltransferase activity;protein binding
0	34.6625	1.82688	LmjF.30.2130	0.259613	5.16349e-44	1.0327e-40	0.117	0.377	Serine/threonine-protein kinase NEK10, putative	ATP binding;protein kinase activity;zinc ion binding
0	34.6625	1.82688	LmjF.32.1640	0.255542	4.17401e-47	8.34801e-44	0.098	0.369	chromosomal passenger complex 2	N/A
0	34.6625	1.82688	LmjF.04.0630	0.25462	6.85169e-18	1.37034e-14	0.37	0.592	hypothetical protein, conserved	N/A
0	34.6625	1.82688	LmjF.10.0620	0.253966	5.55834e-141	1.11167e-137	0.248	0.572	FLA1-binding protein	N/A
0	34.6625	1.82688	LmjF.07.1080	0.253539	3.21261e-60	6.42521e-57	0.106	0.383	hypothetical protein, conserved	protein binding
0	34.6625	1.82688	LmjF.35.1310	0.250986	2.25385e-22	4.50771e-19	0.232	0.354	histone H4	DNA binding;protein heterodimerization activity
0	34.6625	1.82688	LmjF.36.5810	0.249395	3.9434e-123	7.88679e-120	0.192	0.502	hypothetical protein, conserved	N/A
0	34.6625	1.82688	LmjF.06.0210	0.249078	2.01484e-34	4.02968e-31	0.438	0.498	FHA domain containing protein, putative	protein binding
0	34.6625	1.82688	LmjF.36.4650	0.246453	1.32882e-180	2.65764e-177	0.174	0.512	60S acidic ribosomal protein, putative	N/A
0	34.6625	1.82688	LmjF.27.0750	0.245188	1.2108e-37	2.42159e-34	0.215	0.461	Stress responsive A/B Barrel Domain, putative	N/A
0	34.6625	1.82688	LmjF.34.4540	0.237544	1.10047e-145	2.20094e-142	0.158	0.481	13 kDa deflagellation-inducible protein, putative	N/A
0	34.6625	1.82688	LmjF.30.3330	0.237368	4.43472e-13	8.86944e-10	0.118	0.281	hypothetical protein, conserved	N/A
0	34.6625	1.82688	LmjF.08.0680	0.234812	1.40611e-29	2.81221e-26	0.641	0.799	amastin-like protein	N/A
0	34.6625	1.82688	LmjF.06.0200	0.234112	6.38476e-17	1.27695e-13	0.141	0.376	hypothetical protein, conserved	N/A
0	34.6625	1.82688	LmjF.33.0605	0.232325	6.65822e-26	1.33164e-22	0.306	0.541	hypothetical protein, conserved	N/A
0	34.6625	1.82688	LmjF.24.1400	0.23184	1.73208e-120	3.46417e-117	0.188	0.496	hypothetical protein, conserved	N/A
0	34.6625	1.82688	LmjF.04.0790	0.231449	3.03651e-50	6.07303e-47	0.134	0.402	hypothetical protein, conserved	N/A
0	34.6625	1.82688	LmjF.23.1250	0.229316	8.84023e-06	0.0176805	0.138	0.354	Protein of unknown function (DUF3250), putative	N/A
0	34.6625	1.82688	LmjF.35.1355	0.228116	4.95809e-110	9.91618e-107	0.12	0.423	hypothetical protein	N/A
0	34.6625	1.82688	LmjF.06.0430	0.222092	5.48688e-128	1.09738e-124	0.126	0.203	hypothetical protein, conserved	N/A
0	34.6625	1.82688	LmjF.25.0320	0.221662	1.18509e-70	2.37018e-67	0.223	0.503	B9 domain-containing protein 2	N/A
0	34.6625	1.82688	LmjF.31.2220	0.221009	8.54188e-84	1.70838e-80	0.134	0.421	hypothetical protein, unknown function	N/A
0	34.6625	1.82688	LmjF.32.2960	0.218353	3.34696e-83	6.69392e-80	0.135	0.42	DNA replication licensing factor MCM7, putative	ATP binding;DNA binding;DNA helicase activity
0	34.6625	1.82688	LmjF.19.1110	0.215269	2.83939e-25	5.67879e-22	0.158	0.401	mitochondrial carrier protein, putative	N/A
0	34.6625	1.82688	LmjF.09.0190	0.215083	6.30238e-11	1.26048e-07	0.145	0.372	hypothetical protein, conserved	N/A
0	34.6625	1.82688	LmjF.15.1540	0.214001	1.86547e-10	3.73094e-07	0.119	0.348	Radical SAM superfamily/Wyosine base formation, putative	4 iron, 4 sulfur cluster binding;catalytic activity;iron-sulfur cluster binding
0	34.6625	1.82688	LmjF.32.0680	0.213913	4.35628e-87	8.71256e-84	0.259	0.549	OSM3-like kinesin, putative	ATP binding;microtubule binding;microtubule motor activity
0	34.6625	1.82688	LmjF.34.3470	0.211596	5.08561e-08	0.000101712	0.233	0.442	amidinotransferase, putative	N/A
0	34.6625	1.82688	LmjF.35.1490	0.210496	7.08337e-26	1.41667e-22	0.431	0.667	hypothetical protein, conserved	N/A
0	34.6625	1.82688	LmjF.26.2660	0.204443	1.69273e-09	3.38546e-06	0.167	0.322	Nucleoporin NUP92	N/A
0	34.6625	1.82688	LmjF.35.4190	0.203833	2.33568e-157	4.67136e-154	0.23	0.563	hypothetical protein, conserved	N/A
0	34.6625	1.82688	LmjF.23.0845	0.203611	1.78054e-210	3.56108e-207	0.108	0.456	hypothetical protein	N/A
0	34.6625	1.82688	LmjF.28.0390	0.203	1.95057e-28	3.90114e-25	0.158	0.408	Nucleus and spindle associated protein 1, putative	N/A
0	34.6625	1.82688	LmjF.20.1110	0.202331	1.20136e-43	2.40273e-40	0.207	0.467	hypothetical protein, conserved	N/A
0	34.6625	1.82688	LmjF.24.1760	0.202086	3.51471e-41	7.02941e-38	0.082	0.347	hypothetical protein, conserved	N/A
0	34.6625	1.82688	LmjF.35.4970	0.201296	4.17729e-290	8.35457e-287	0.161	0.542	hypothetical protein, conserved	N/A
0	34.6625	1.82688	LmjF.36.1330	0.199336	2.15673e-227	4.31346e-224	0.188	0.548	heat shock protein, putative	N/A
0	34.6625	1.82688	LmjF.01.0030	0.199038	5.61466e-217	1.12293e-213	0.149	0.502	Kinesin-13 1, putative	ATP binding;microtubule binding;microtubule motor activity
0	34.6625	1.82688	LmjF.09.0080	0.197508	7.23438e-189	1.44688e-185	0.118	0.457	RNA-binding protein 5-like protein	nucleic acid binding
0	34.6625	1.82688	LmjF.35.0180	0.196711	2.53839e-167	5.07679e-164	0.079	0.153	hypothetical protein, conserved	N/A
0	34.6625	1.82688	LmjF.06.1200	0.196695	9.20968e-20	1.84194e-16	0.134	0.37	hypothetical protein, unknown function	N/A
0	34.6625	1.82688	LmjF.30.3140	0.195532	3.55577e-171	7.11154e-168	0.253	0.597	hypothetical protein, conserved	N/A
0	34.6625	1.82688	LmjF.28.1790	0.195085	1.87351e-05	0.0374702	0.094	0.276	ATPase-like protein	ATP binding;ATPase activity
0	34.6625	1.82688	LmjF.31.2320	0.194304	1.11324e-30	2.22649e-27	0.116	0.372	helicase-like protein	ATP binding
0	34.6625	1.82688	LmjF.21.1220	0.193595	1.65139e-151	3.30278e-148	0.185	0.513	hypothetical protein, conserved	N/A
0	34.6625	1.82688	LmjF.07.0210	0.193284	2.00466e-283	4.00932e-280	0.148	0.52	hypothetical protein, conserved	N/A
0	34.6625	1.82688	LmjF.15.0040	0.189608	1.56229e-54	3.12457e-51	0.183	0.45	Possible lysine decarboxylase, putative	N/A
0	34.6625	1.82688	LmjF.23.1610	0.187066	1.23875e-65	2.47751e-62	0.068	0.197	hypothetical protein, conserved	N/A
0	34.6625	1.82688	LmjF.32.3430	0.186498	1.50562e-12	3.01124e-09	0.153	0.379	Uncharacterised protein family UPF0564, putative	N/A
0	34.6625	1.82688	LmjF.18.1410	0.186001	5.1665e-78	1.0333e-74	0.191	0.476	hypothetical protein, conserved	N/A
0	34.6625	1.82688	LmjF.33.1740	0.178576	1.12302e-145	2.24603e-142	0.095	0.416	macrophage migration inhibitory factor-like protein	N/A
0	34.6625	1.82688	LmjF.07.0025	0.178221	3.39373e-21	6.78746e-18	0.373	0.591	histone-lysine N-methyltransferase, putative	histone methyltransferase activity (H3-K79 specific);histone-lysine N-methyltransferase activity
0	34.6625	1.82688	LmjF.32.2930	0.178191	2.66438e-122	5.32876e-119	0.137	0.448	tubulin-tyrosine ligase-like protein	N/A
0	34.6625	1.82688	LmjF.28.1120	0.176794	1.66879e-31	3.33757e-28	0.124	0.383	hypothetical protein, conserved	N/A
0	34.6625	1.82688	LmjF.25.0390	0.176562	1.17552e-200	2.35104e-197	0.22	0.571	hypothetical protein, conserved	N/A
0	34.6625	1.82688	LmjF.31.0320	0.17638	6.09341e-06	0.0121868	0.518	0.722	amino acid transporter, putative	N/A
0	34.6625	1.82688	LmjF.11.1320	0.175818	2.93876e-50	5.87752e-47	0.185	0.451	hypothetical protein, conserved	N/A
0	34.6625	1.82688	LmjF.29.0280	0.175598	6.28134e-25	1.25627e-21	0.444	0.683	D-lactate dehydrogenase-like protein	FAD binding;catalytic activity;flavin adenine dinucleotide binding;oxidoreductase activity
0	34.6625	1.82688	LmjF.11.0150	0.174052	1.3149e-122	2.62979e-119	0.185	0.496	hypothetical protein, conserved	N/A
0	34.6625	1.82688	LmjF.35.2075	0.17316	7.38024e-131	1.47605e-127	0.266	0.585	hypothetical protein	N/A
0	34.6625	1.82688	LmjF.31.2870	0.171645	2.27225e-32	4.5445e-29	0.304	0.549	hypothetical protein, conserved	N/A
0	34.6625	1.82688	LmjF.07.0070	0.17077	7.46827e-149	1.49365e-145	0.163	0.489	hypothetical protein, conserved	N/A
0	34.6625	1.82688	LmjF.27.2020	0.170087	2.31874e-83	4.63749e-80	0.323	0.62	D-lactate dehydrogenase-like protein	FAD binding;catalytic activity;flavin adenine dinucleotide binding;oxidoreductase activity
0	34.6625	1.82688	LmjF.07.0360	0.169583	2.66689e-89	5.33379e-86	0.229	0.521	Protein of unknown function (DUF1674), putative	N/A
0	34.6625	1.82688	LmjF.36.5970	0.169539	6.50944e-118	1.30189e-114	0.192	0.505	Flagellum attachment zone protein 5	N/A
0	34.6625	1.82688	LmjF.14.0430	0.166437	1.11621e-79	2.23243e-76	0.095	0.213	mRNA capping enzyme, beta chain, putative	polynucleotide 5'-phosphatase activity
0	34.6625	1.82688	LmjF.24.1720	0.166218	6.14061e-94	1.22812e-90	0.15	0.45	cell division cycle protein 20, putative	anaphase-promoting complex binding;protein binding;ubiquitin-protein transferase activator activity
0	34.6625	1.82688	LmjF.21.0450	0.165448	5.87132e-174	1.17426e-170	0.203	0.539	hypothetical protein, unknown function	N/A
0	34.6625	1.82688	LmjF.28.2480	0.164808	5.49141e-59	1.09828e-55	0.271	0.544	hypothetical protein, conserved	N/A
0	34.6625	1.82688	LmjF.35.3310	0.164385	1.83869e-45	3.67738e-42	0.208	0.472	Leucine Rich repeats (2 copies), putative	protein binding
0	34.6625	1.82688	LmjF.17.0690	0.164357	5.73542e-14	1.14708e-10	0.107	0.269	hypothetical protein, conserved	N/A
0	34.6625	1.82688	LmjF.03.0460	0.16382	3.62443e-09	7.24885e-06	0.151	0.373	hypothetical protein	N/A
0	34.6625	1.82688	LmjF.09.0410	0.16353	1.79965e-16	3.5993e-13	0.135	0.373	kinetoplastid kinetochore protein 19, putative	ATP binding;protein kinase activity
0	34.6625	1.82688	LmjF.34.0250	0.162607	2.18469e-59	4.36938e-56	0.372	0.644	hypothetical protein, conserved	N/A
0	34.6625	1.82688	LmjF.28.1990	0.161839	6.42824e-109	1.28565e-105	0.139	0.448	hypothetical protein, conserved	protein binding
0	34.6625	1.82688	LmjF.27.2040	0.161254	1.75165e-101	3.50331e-98	0.139	0.442	Transmembrane adaptor Erv26, putative	COPII receptor activity
0	34.6625	1.82688	LmjF.32.3320	0.160039	3.19743e-143	6.39487e-140	0.181	0.507	cyclin 6, putative	N/A
0	34.6625	1.82688	LmjF.26.2420	0.15933	8.56991e-77	1.71398e-73	0.145	0.436	hypothetical protein, conserved	protein binding
0	34.6625	1.82688	LmjF.29.0270	0.157362	0	0	0.096	0.483	hypothetical protein, conserved	N/A
0	34.6625	1.82688	LmjF.34.0550	0.157301	3.83175e-86	7.66349e-83	0.344	0.649	Cysteine leucine rich protein	N/A
0	34.6625	1.82688	LmjF.32.2640	0.156176	1.26375e-123	2.5275e-120	0.171	0.485	cysteine desulfhydrase	catalytic activity;cystathionine beta-lyase activity;pyridoxal phosphate binding
0	34.6625	1.82688	LmjF.29.1900	0.155948	3.6372e-85	7.27439e-82	0.12	0.416	hypothetical protein, conserved	N/A
0	34.6625	1.82688	LmjF.33.2120	0.15533	8.11871e-131	1.62374e-127	0.142	0.46	HIT zinc finger, putative	N/A
0	34.6625	1.82688	LmjF.27.2050	0.154893	7.41557e-25	1.48311e-21	0.244	0.48	ribonucleoside-diphosphate reductase small chain, putative	oxidoreductase activity
0	34.6625	1.82688	LmjF.34.2540	0.154435	3.35987e-49	6.71973e-46	0.181	0.449	Coiled-coil and C2 domain-containing protein	N/A
0	34.6625	1.82688	LmjF.14.0590	0.153818	1.03276e-22	2.06551e-19	0.093	0.25	hypothetical protein, conserved	N/A
0	34.6625	1.82688	LmjF.27.0210	0.152698	1.95274e-72	3.90547e-69	0.237	0.521	Vacuolar iron transporter 1, putative	manganese ion transmembrane transporter activity
0	34.6625	1.82688	LmjF.16.1310	0.152638	4.66455e-67	9.3291e-64	0.343	0.63	cytochrome c, putative	electron transfer activity;heme binding
0	34.6625	1.82688	LmjF.07.0030	0.149905	6.47853e-31	1.29571e-27	0.197	0.32	hypothetical protein, conserved	N/A
0	34.6625	1.82688	LmjF.36.0260	0.14982	7.57119e-63	1.51424e-59	0.374	0.653	xylulokinase, putative	phosphotransferase activity, alcohol group as acceptor;xylulokinase activity
0	34.6625	1.82688	LmjF.16.0400	0.149712	9.27129e-45	1.85426e-41	0.186	0.447	hypothetical protein, conserved	N/A
0	34.6625	1.82688	LmjF.21.0570	0.149283	4.13185e-153	8.2637e-150	0.189	0.519	hypothetical protein, conserved	N/A
0	34.6625	1.82688	LmjF.34.2570	0.149154	6.52368e-96	1.30474e-92	0.185	0.484	Flagellum attachment zone protein 8	N/A
0	34.6625	1.82688	LmjF.36.6710	0.14844	3.92524e-47	7.85047e-44	0.135	0.4	replication factor C subunit 3, putative	DNA binding
0	34.6625	1.82688	LmjF.34.0980	0.148052	2.33048e-190	4.66096e-187	0.196	0.542	amastin-like protein	N/A
0	34.6625	1.82688	LmjF.32.0290	0.147228	1.3887e-304	2.77741e-301	0.137	0.519	hypothetical protein, conserved	N/A
0	34.6625	1.82688	LmjF.34.0970	0.146326	8.71506e-10	1.74301e-06	0.71	0.777	amastin-like protein	N/A
0	34.6625	1.82688	LmjF.27.2160	0.146142	1.08569e-58	2.17138e-55	0.242	0.517	hypothetical protein, conserved	N/A
0	34.6625	1.82688	LmjF.31.1770	0.145694	1.40863e-122	2.81727e-119	0.228	0.546	hypothetical protein, unknown function	N/A
0	34.6625	1.82688	LmjF.19.0010	0.143884	5.71401e-159	1.1428e-155	0.219	0.549	Qb-SNARE protein, putative	N/A
0	34.6625	1.82688	LmjF.35.4440	0.139392	4.50896e-07	0.000901791	0.135	0.303	hypothetical protein, conserved	N/A
0	34.6625	1.82688	LmjF.05.1050	0.138038	2.31236e-127	4.62471e-124	0.106	0.191	hypothetical protein, unknown function	N/A
0	34.6625	1.82688	LmjF.31.0530	0.136473	3.30664e-82	6.61328e-79	0.22	0.51	hypothetical protein, unknown function	N/A
0	34.6625	1.82688	LmjF.30.0705	0.136439	1.04408e-237	2.08816e-234	0.123	0.481	hypothetical protein, conserved	catalytic activity
0	34.6625	1.82688	LmjF.26.1340	0.135784	4.31628e-14	8.63256e-11	0.42	0.626	DNA ligase k alpha, putative	ATP binding;DNA ligase (ATP) activity
0	34.6625	1.82688	LmjF.20.0030	0.135641	3.34612e-06	0.00669225	0.193	0.402	Histone-lysine N-methyltransferase, H3 lysine-76 specific	histone methyltransferase activity (H3-K79 specific);histone-lysine N-methyltransferase activity
0	34.6625	1.82688	LmjF.09.1310	0.135557	0	0	0.145	0.535	PPPDE putative peptidase domain containing protein, putative	N/A
0	34.6625	1.82688	LmjF.23.0223	0.134863	1.47807e-101	2.95614e-98	0.094	0.398	hypothetical protein, conserved	N/A
0	34.6625	1.82688	LmjF.20.1660	0.134529	4.69011e-94	9.38022e-91	0.087	0.387	hypothetical protein, conserved	N/A
0	34.6625	1.82688	LmjF.27.2310	0.133624	1.74403e-26	3.48807e-23	0.046	0.214	hypothetical protein, conserved	N/A
0	34.6625	1.82688	LmjF.30.2690	0.133265	1.85948e-106	3.71897e-103	0.113	0.415	SH3 domain protein-like protein	protein binding
0	34.6625	1.82688	LmjF.30.0500	0.131593	3.62647e-14	7.25294e-11	0.085	0.255	hypothetical protein, conserved	N/A
0	34.6625	1.82688	LmjF.25.0750	0.131559	2.73044e-109	5.46087e-106	0.216	0.523	protein phosphatase 2C, putative	cation binding;phosphatase activity
0	34.6625	1.82688	LmjF.11.0130	0.128127	5.47008e-153	1.09402e-149	0.171	0.5	NGG1 interacting factor 3-like protein	N/A
0	34.6625	1.82688	LmjF.34.2479	0.127516	6.98356e-24	1.39671e-20	0.078	0.238	hypothetical protein, conserved	N/A
0	34.6625	1.82688	LmjF.04.0590	0.127144	2.56584e-44	5.13169e-41	0.206	0.467	hypothetical protein	N/A
0	34.6625	1.82688	LmjF.27.0110	0.126117	5.78426e-41	1.15685e-37	0.267	0.523	hypothetical protein, conserved	N/A
0	34.6625	1.82688	LmjF.17.0850	0.123927	6.7004e-83	1.34008e-79	0.13	0.422	hypothetical protein, conserved	N/A
0	34.6625	1.82688	LmjF.35.2660	0.123486	1.45647e-06	0.00291293	0.135	0.354	hypothetical protein, conserved	N/A
0	34.6625	1.82688	LmjF.27.1090	0.122889	6.15743e-195	1.23149e-191	0.171	0.518	Emopamil binding protein, putative	N/A
0	34.6625	1.82688	LmjF.04.1165	0.122199	1.11954e-239	2.23909e-236	0.08	0.13	hypothetical protein	N/A
0	34.6625	1.82688	LmjF.10.0560	0.121814	4.75501e-33	9.51001e-30	0.083	0.236	zinc binding dehydrogenase-like protein	oxidoreductase activity
0	34.6625	1.82688	LmjF.24.0530	0.120497	1.23802e-06	0.00247605	0.091	0.32	hypothetical protein, conserved	N/A
0	34.6625	1.82688	LmjF.30.3015	0.120459	2.0216e-122	4.04319e-119	0.111	0.423	Lsm5p, putative	N/A
0	34.6625	1.82688	LmjF.32.2980	0.120323	6.76595e-39	1.35319e-35	0.125	0.388	ATP binding protein-like protein	N/A
0	34.6625	1.82688	LmjF.29.1970	0.119749	4.47034e-80	8.94069e-77	0.12	0.412	hypothetical protein, unknown function	N/A
0	34.6625	1.82688	LmjF.35.4420	0.117562	2.28373e-131	4.56746e-128	0.112	0.429	mitochondrial phosphate transporter, putative	N/A
0	34.6625	1.82688	LmjF.34.2740	0.116647	5.84766e-144	1.16953e-140	0.162	0.486	hypothetical protein, unknown function	N/A
0	34.6625	1.82688	LmjF.18.0810	0.115883	4.15576e-100	8.31151e-97	0.126	0.431	ethanolamine phosphotransferase, putative	phosphotransferase activity, for other substituted phosphate groups
0	34.6625	1.82688	LmjF.23.1160	0.115681	1.67397e-18	3.34794e-15	0.102	0.348	hypothetical protein, conserved	N/A
0	34.6625	1.82688	LmjF.36.4200	0.11545	3.68369e-81	7.36739e-78	0.283	0.57	Arrestin (or S-antigen), N-terminal domain containing protein, putative	N/A
0	34.6625	1.82688	LmjF.29.2820	0.113294	1.36271e-77	2.72542e-74	0.074	0.369	hypothetical protein, conserved	N/A
0	34.6625	1.82688	LmjF.28.1050	0.112229	6.23378e-10	1.24676e-06	0.154	0.318	hypothetical protein, conserved	N/A
0	34.6625	1.82688	LmjF.13.1690	0.111476	6.52247e-13	1.30449e-09	0.206	0.431	Protein Associated with Differentiation, putative	transmembrane transporter activity
0	34.6625	1.82688	LmjF.27.0130	0.110711	4.56177e-27	9.12354e-24	0.989	0.967	WW domain/Zinc finger C-x8-C-x5-C-x3-H type (and similar), putative	metal ion binding;protein binding
0	34.6625	1.82688	LmjF.36.5100	0.1104	5.48888e-21	1.09778e-17	0.245	0.374	hypothetical protein, conserved	N/A
0	34.6625	1.82688	LmjF.16.1280	0.109907	3.97571e-157	7.95142e-154	0.269	0.602	hypothetical protein, conserved	N/A
0	34.6625	1.82688	LmjF.16.0490	0.109887	1.41613e-179	2.83227e-176	0.231	0.578	hypothetical protein, conserved	N/A
0	34.6625	1.82688	LmjF.28.2640	0.109707	4.96949e-51	9.93899e-48	0.128	0.397	molybdenum cofactor biosynthesis protein, putative	N/A
0	34.6625	1.82688	LmjF.35.2090	0.109279	2.13194e-177	4.26389e-174	0.134	0.47	kinesin, putative	ATP binding;microtubule binding;microtubule motor activity
0	34.6625	1.82688	LmjF.31.1580	0.10915	2.09913e-253	4.19825e-250	0.19	0.558	hypothetical protein, conserved	N/A
0	34.6625	1.82688	LmjF.30.1255	0.108089	9.01581e-60	1.80316e-56	0.163	0.441	hypothetical protein, conserved	N-acetyltransferase activity
0	34.6625	1.82688	LmjF.21.1680	0.107951	7.13195e-159	1.42639e-155	0.114	0.186	pumillio protein 3, putative	RNA binding
0	34.6625	1.82688	LmjF.16.1660	0.107248	3.76873e-95	7.53747e-92	0.073	0.378	Flagellar Member 3	protein binding
0	34.6625	1.82688	LmjF.24.1210	0.106874	1.18087e-95	2.36175e-92	0.114	0.213	Eukaryotic translation initiation factor 1, putative	translation initiation factor activity
0	34.6625	1.82688	LmjF.12.0080	0.106437	1.13163e-32	2.26326e-29	0.06	0.218	kinetoplastid kinetochore protein 6, putative	N/A
0	34.6625	1.82688	LmjF.36.3800	0.105899	1.40014e-20	2.80029e-17	0.358	0.588	aminomethyltransferase, mitochondrial, putative	aminomethyltransferase activity;protein binding
0	34.6625	1.82688	LmjF.35.2480	0.104187	1.38374e-125	2.76748e-122	0.17	0.485	Nop53 (60S ribosomal biogenesis), putative	N/A
0	34.6625	1.82688	LmjF.31.0200	0.103708	2.24293e-34	4.48587e-31	0.144	0.281	WD repeat protein	protein binding
0	34.6625	1.82688	LmjF.28.0180	0.103468	8.78711e-12	1.75742e-08	0.205	0.425	hypothetical protein, conserved	N/A
0	34.6625	1.82688	LmjF.36.1310	0.100192	9.53424e-78	1.90685e-74	0.106	0.396	hypothetical protein, conserved	N/A
0	34.6625	1.82688	LmjF.36.6290	0.100056	3.8861e-75	7.77221e-72	0.325	0.616	glucose transporter 2	transmembrane transporter activity
0	34.6625	1.82688	LmjF.36.4750	-0.100051	8.96308e-133	1.79262e-129	0.027	0.144	PIG-P, putative	phosphatidylinositol N-acetylglucosaminyltransferase activity
0	34.6625	1.82688	LmjF.14.0770	-0.100081	6.46958e-32	1.29392e-28	0.093	0.358	hypothetical protein, unknown function	N/A
0	34.6625	1.82688	LmjF.34.3980	-0.100097	2.3499e-22	4.69979e-19	0.13	0.284	nucleolar protein family a member-like protein	N/A
0	34.6625	1.82688	LmjF.10.0540	-0.100113	4.13028e-27	8.26056e-24	0.241	0.487	hypothetical protein, unknown function	N/A
0	34.6625	1.82688	LmjF.04.0080	-0.100172	9.07118e-182	1.81424e-178	0.034	0.129	hypothetical protein, conserved	N/A
0	34.6625	1.82688	LmjF.06.0130	-0.100618	3.03567e-14	6.07134e-11	0.079	0.257	conserved hypothetical protein, putative	N/A
0	34.6625	1.82688	LmjF.25.0360	-0.100807	3.03721e-07	0.000607442	0.034	0.276	hypothetical protein, conserved	N/A
0	34.6625	1.82688	LmjF.36.0280	-0.100842	1.12668e-28	2.25337e-25	0.055	0.32	hypothetical protein, conserved	N/A
0	34.6625	1.82688	LmjF.30.1550	-0.101292	5.6333e-47	1.12666e-43	0.084	0.361	pseudouridine synthase A-like protein, putative	RNA binding;pseudouridine synthase activity
0	34.6625	1.82688	LmjF.36.2860	-0.101331	3.7321e-105	7.4642e-102	0.196	0.502	40S ribosomal protein S24e	structural constituent of ribosome
0	34.6625	1.82688	LmjF.07.0510	-0.10156	5.31518e-06	0.0106304	0.586	0.71	60S ribosomal protein L7a, putative	N/A
0	34.6625	1.82688	LmjF.35.3370	-0.101585	1.4326e-105	2.8652e-102	0.145	0.456	hypothetical protein, conserved	N/A
0	34.6625	1.82688	LmjF.04.0100	-0.101707	4.32023e-08	8.64046e-05	0.106	0.343	hypothetical protein, conserved	N/A
0	34.6625	1.82688	LmjF.36.6380	-0.101849	1.52476e-243	3.04952e-240	0.176	0.549	rib72 protein-like protein	calcium ion binding
0	34.6625	1.82688	LmjF.34.0380	-0.101926	9.71937e-06	0.0194387	0.084	0.277	hypothetical protein, unknown function	N/A
0	34.6625	1.82688	LmjF.35.0350	-0.101978	8.94192e-33	1.78838e-29	0.094	0.249	hypothetical protein, conserved	N/A
0	34.6625	1.82688	LmjF.01.0800	-0.101993	7.40465e-103	1.48093e-99	0.109	0.421	hypothetical protein, conserved	N/A
0	34.6625	1.82688	LmjF.35.1120	-0.102076	1.02872e-223	2.05743e-220	0.098	0.456	Selenoprotein T, putative	N/A
0	34.6625	1.82688	LmjF.32.2690	-0.102117	1.0803e-07	0.000216061	0.444	0.615	ribosomal protein L27, putative	structural constituent of ribosome
0	34.6625	1.82688	LmjF.14.1390	-0.10293	1.32465e-72	2.64931e-69	0.144	0.435	emp24/gp25L/p24 family/GOLD, putative	N/A
0	34.6625	1.82688	LmjF.26.1060	-0.102992	7.10086e-41	1.42017e-37	0.076	0.351	RNA recognition motif. (a.k.a. RRM, RBD, or RNP domain), putative	nucleic acid binding
0	34.6625	1.82688	LmjF.28.2940	-0.103312	1.04008e-11	2.08016e-08	0.051	0.239	hypothetical protein, unknown function	N/A
0	34.6625	1.82688	LmjF.13.1200	-0.103317	5.2044e-13	1.04088e-09	0.068	0.316	hypothetical protein, conserved	N/A
0	34.6625	1.82688	LmjF.16.0520	-0.104358	3.84705e-33	7.6941e-30	0.134	0.275	hypothetical protein, conserved	N/A
0	34.6625	1.82688	LmjF.25.0700	-0.104514	8.2363e-175	1.64726e-171	0.018	0.121	hypothetical protein, conserved	N/A
0	34.6625	1.82688	LmjF.32.3750	-0.104638	0	0	0.074	0.465	Methyltransferase TYW3, putative	N/A
0	34.6625	1.82688	LmjF.36.4950	-0.105069	6.76807e-41	1.35361e-37	0.068	0.343	2OG-Fe(II) oxygenase superfamily, putative	N/A
0	34.6625	1.82688	LmjF.30.0700	-0.105525	8.02209e-63	1.60442e-59	0.036	0.183	nuclear movement protein, putative	N/A
0	34.6625	1.82688	LmjF.06.0570	-0.105622	1.81823e-236	3.63645e-233	0.043	0.115	60S ribosomal protein L23a, putative	structural constituent of ribosome
0	34.6625	1.82688	LmjF.04.0270	-0.105766	3.85057e-161	7.70114e-158	0.11	0.448	Mitochondrial 39-S ribosomal protein L47 (MRP-L47), putative	structural constituent of ribosome
0	34.6625	1.82688	LmjF.28.0950	-0.106145	8.0499e-149	1.60998e-145	0.103	0.438	Tctex-1 family, putative	N/A
0	34.6625	1.82688	LmjF.33.1880	-0.106253	2.75165e-18	5.5033e-15	0.054	0.233	hypothetical protein, conserved	protein binding
0	34.6625	1.82688	LmjF.36.0130	-0.106417	7.14254e-295	1.42851e-291	0.041	0.1	PUB domain containing protein, putative	N/A
0	34.6625	1.82688	LmjF.25.0160	-0.106435	4.90343e-191	9.80685e-188	0.027	0.121	hypothetical protein, conserved	N/A
0	34.6625	1.82688	LmjF.29.2740	-0.10654	2.42282e-182	4.84564e-179	0.011	0.113	actin-like protein, putative	N/A
0	34.6625	1.82688	LmjF.32.1610	-0.106789	5.18745e-55	1.03749e-51	0.08	0.22	hypothetical protein, conserved	N/A
0	34.6625	1.82688	LmjF.30.2310	-0.106965	1.71151e-22	3.42302e-19	0.074	0.333	hypothetical protein, conserved	N/A
0	34.6625	1.82688	LmjF.29.0180	-0.10703	5.41227e-128	1.08245e-124	0.135	0.455	hypothetical protein, conserved	N/A
0	34.6625	1.82688	LmjF.23.0130	-0.107104	1.41877e-59	2.83754e-56	0.024	0.177	vacuolar type h+ ATPase subunit, putative	proton transmembrane transporter activity
0	34.6625	1.82688	LmjF.10.0930	-0.107166	3.58061e-67	7.16121e-64	0.037	0.183	hypothetical protein, conserved (pseudogene)	N/A
0	34.6625	1.82688	LmjF.36.0535	-0.107347	6.77001e-11	1.354e-07	0.037	0.23	U2 small nuclear ribonucleoprotein 16.5K, putative	N/A
0	34.6625	1.82688	LmjF.31.2600	-0.107458	4.63948e-22	9.27895e-19	0.296	0.528	calreticulin, putative	calcium ion binding;protein binding;unfolded protein binding
0	34.6625	1.82688	LmjF.31.0390	-0.107493	1.16255e-24	2.3251e-21	0.116	0.271	Calpain-like protein 2	calcium-dependent cysteine-type endopeptidase activity
0	34.6625	1.82688	LmjF.17.0350	-0.107539	3.19054e-47	6.38108e-44	0.125	0.401	dihydrouridine synthase (Dus), putative	catalytic activity;flavin adenine dinucleotide binding;tRNA dihydrouridine synthase activity
0	34.6625	1.82688	LmjF.01.0520	-0.107847	5.2922e-79	1.05844e-75	0.108	0.406	long-chain-fatty-acid-CoA ligase, putative	N/A
0	34.6625	1.82688	LmjF.16.0290	-0.108274	2.05703e-215	4.11405e-212	0.044	0.125	proteasome 26S non-ATPase subunit 9, putative	protein binding
0	34.6625	1.82688	LmjF.10.1120	-0.108327	2.43193e-18	4.86385e-15	0.061	0.316	hypothetical protein, conserved	N/A
0	34.6625	1.82688	LmjF.35.5260	-0.108948	6.24729e-20	1.24946e-16	0.064	0.24	hypothetical protein, conserved	transcription coactivator activity
0	34.6625	1.82688	LmjF.34.0190	-0.10898	1.00684e-16	2.01368e-13	0.132	0.373	Domain of unknown function (DUF1935), putative	N/A
0	34.6625	1.82688	LmjF.35.4460	-0.109155	5.95366e-61	1.19073e-57	0.104	0.391	sm-f snRNP core complex protein, putative	N/A
0	34.6625	1.82688	LmjF.10.1228	-0.109186	3.64045e-50	7.2809e-47	0.039	0.194	methyltransferase domain containing protein, putative	N/A
0	34.6625	1.82688	LmjF.10.0770	-0.10945	2.21233e-22	4.42466e-19	0.112	0.366	hypothetical protein, unknown function	N/A
0	34.6625	1.82688	LmjF.30.3730	-0.109615	4.22535e-110	8.4507e-107	0.076	0.183	60S acidic ribosomal protein P2, putative	structural constituent of ribosome
0	34.6625	1.82688	LmjF.31.2250	-0.110024	5.66435e-107	1.13287e-103	0.073	0.182	3,2-trans-enoyl-CoA isomerase, mitochondrial precursor, putative	catalytic activity
0	34.6625	1.82688	LmjF.30.0170	-0.111015	6.90716e-96	1.38143e-92	0.044	0.171	Rubisco LSMT substrate-binding, putative	N/A
0	34.6625	1.82688	LmjF.17.1360	-0.111054	1.08265e-07	0.000216531	0.111	0.343	L-galactonolactone oxidase, putative	D-arabinono-1,4-lactone oxidase activity;FAD binding;flavin adenine dinucleotide binding;oxidoreductase activity;oxidoreductase activity, acting on the CH-OH group of donors, oxygen as acceptor
0	34.6625	1.82688	LmjF.18.0780	-0.111681	2.94119e-20	5.88239e-17	0.098	0.349	DNA-directed RNA polymerase II/III subunit, putative	DNA binding;DNA-directed 5'-3' RNA polymerase activity
0	34.6625	1.82688	LmjF.15.0010	-0.111696	3.38767e-08	6.77534e-05	0.453	0.62	histone H4	DNA binding;protein heterodimerization activity
0	34.6625	1.82688	LmjF.36.6880	-0.111712	1.62272e-16	3.24544e-13	0.042	0.297	Bromodomain factor 1	protein binding
0	34.6625	1.82688	LmjF.33.2370	-0.111739	1.371e-59	2.74201e-56	0.096	0.382	Nucleoporin NUP59	N/A
0	34.6625	1.82688	LmjF.34.2820	-0.111885	1.62279e-06	0.00324558	0.219	0.436	regulatory subunit of protein kinase a-like protein	N/A
0	34.6625	1.82688	LmjF.18.0120	-0.1119	3.97245e-89	7.94491e-86	0.078	0.381	ADP-ribosylation factor-like protein 2-binding protein, putative	N/A
0	34.6625	1.82688	LmjF.16.0110	-0.11205	7.57765e-135	1.51553e-131	0.23	0.558	Phosphotransferase enzyme family, putative	N/A
0	34.6625	1.82688	LmjF.35.4750	-0.112737	3.28203e-128	6.56406e-125	0.155	0.479	glyceraldehyde-3-phosphate dehydrogenase-like protein	NAD binding;oxidoreductase activity, acting on the aldehyde or oxo group of donors, NAD or NADP as acceptor
0	34.6625	1.82688	LmjF.31.3070	-0.11312	7.23035e-133	1.44607e-129	0.066	0.167	iron/zinc transporter protein-like protein	metal ion transmembrane transporter activity
0	34.6625	1.82688	LmjF.05.1130	-0.11371	7.12871e-25	1.42574e-21	0.024	0.203	hypothetical protein, conserved	N/A
0	34.6625	1.82688	LmjF.35.0060	-0.114941	2.66163e-06	0.00532326	0.119	0.35	hypothetical protein, conserved	N/A
0	34.6625	1.82688	LmjF.34.3720	-0.115069	9.31479e-97	1.86296e-93	0.016	0.149	Protein of unknown function (DUF501), putative	N/A
0	34.6625	1.82688	LmjF.10.0390	-0.11583	3.09217e-23	6.18434e-20	0.086	0.342	folate/biopterin transporter, putative	N/A
0	34.6625	1.82688	LmjF.28.0540	-0.115888	2.87758e-53	5.75516e-50	0.337	0.588	ribosomal protein S26, putative	structural constituent of ribosome
0	34.6625	1.82688	LmjF.04.0820	-0.115933	2.798e-93	5.59601e-90	0.116	0.422	Peptide deformylase 2, putative	N/A
0	34.6625	1.82688	LmjF.31.2640	-0.115968	4.59098e-20	9.18197e-17	0.123	0.282	2-oxoglutarate dehydrogenase, e3 component, lipoamidedehydrogenase-like protein	flavin adenine dinucleotide binding;oxidoreductase activity
0	34.6625	1.82688	LmjF.25.0400	-0.11605	4.67098e-22	9.34196e-19	0.087	0.343	hypothetical protein, unknown function	N/A
0	34.6625	1.82688	LmjF.36.1040	-0.116384	1.0645e-27	2.129e-24	0.087	0.353	Flagellar C1a complex subunit C1a-32, putative	N/A
0	34.6625	1.82688	LmjF.35.0780	-0.116656	1.6024e-145	3.2048e-142	0.149	0.48	hypothetical protein, unknown function	N/A
0	34.6625	1.82688	LmjF.07.0850	-0.116716	7.32009e-06	0.0146402	0.105	0.291	ubiquitin-conjugating enzyme E2, putative	N/A
0	34.6625	1.82688	LmjF.24.1290	-0.11727	1.78032e-201	3.56063e-198	0.112	0.461	WASH complex subunit 7, N-terminal/WASH complex subunit 7/WASH complex subunit 7, C-terminal, putative	N/A
0	34.6625	1.82688	LmjF.35.2220	-0.117369	4.72928e-31	9.45856e-28	0.143	0.282	kinetoplastid membrane protein-11	N/A
0	34.6625	1.82688	LmjF.06.1050	-0.117704	1.74106e-42	3.48212e-39	0.268	0.525	protein disulfide isomerase	protein disulfide isomerase activity
0	34.6625	1.82688	LmjF.30.2845	-0.117862	3.39563e-27	6.79126e-24	0.07	0.235	succinate dehydrogenase subunit 3	N/A
0	34.6625	1.82688	LmjF.36.6050	-0.117887	2.16366e-26	4.32732e-23	0.091	0.35	hypothetical protein, conserved	N/A
0	34.6625	1.82688	LmjF.25.1090	-0.117909	2.05193e-16	4.10386e-13	0.216	0.356	magnesium transporter protein 2	magnesium ion transmembrane transporter activity;metal ion transmembrane transporter activity
0	34.6625	1.82688	LmjF.20.1440	-0.118384	7.65711e-96	1.53142e-92	0.073	0.189	hypothetical protein, conserved	N/A
0	34.6625	1.82688	LmjF.32.2360	-0.11866	1.36942e-10	2.73883e-07	0.08	0.323	hypothetical protein, conserved	N/A
0	34.6625	1.82688	LmjF.36.0470	-0.118719	1.22212e-165	2.44424e-162	0.064	0.402	dihydrouridine synthase domain protein-like protein	catalytic activity;flavin adenine dinucleotide binding;tRNA dihydrouridine synthase activity
0	34.6625	1.82688	LmjF.31.3110	-0.118873	1.33675e-189	2.67351e-186	0.032	0.127	Flagellum attachment zone protein 14	N/A
0	34.6625	1.82688	LmjF.21.0910	-0.119346	1.5845e-20	3.16901e-17	0.073	0.329	Aminoacyl-tRNA editing domain containing protein, putative	aminoacyl-tRNA editing activity
0	34.6625	1.82688	LmjF.31.1090	-0.119374	5.59892e-25	1.11978e-21	0.091	0.347	hypothetical protein, conserved	N/A
0	34.6625	1.82688	LmjF.34.3830	-0.11943	9.12093e-72	1.82419e-68	0.013	0.158	hypothetical protein, conserved	N/A
0	34.6625	1.82688	LmjF.30.0690	-0.119577	5.45173e-15	1.09035e-11	0.039	0.223	40S ribosomal protein S30, putative	structural constituent of ribosome
0	34.6625	1.82688	LmjF.14.1050	-0.11993	2.08765e-215	4.17531e-212	0.053	0.129	COQ9, putative	lipid binding
0	34.6625	1.82688	LmjF.12.0090	-0.120259	2.80706e-160	5.61412e-157	0.071	0.159	hypothetical protein, conserved	N/A
0	34.6625	1.82688	LmjF.30.2000	-0.120352	4.97817e-178	9.95633e-175	0.111	0.454	intraflagellar transport (IFT) protein, putative	N/A
0	34.6625	1.82688	LmjF.34.3680	-0.120738	7.82715e-12	1.56543e-08	0.059	0.308	50S ribosomal protein L13-like protein	structural constituent of ribosome
0	34.6625	1.82688	LmjF.06.0290	-0.120781	4.65671e-105	9.31342e-102	0.028	0.156	ribonuclease H1, putative	RNA-DNA hybrid ribonuclease activity;magnesium ion binding;nucleic acid binding
0	34.6625	1.82688	LmjF.04.0470	-0.120808	9.49333e-29	1.89867e-25	0.351	0.578	60S ribosomal protein L11 (L5, L16)	structural constituent of ribosome
0	34.6625	1.82688	LmjF.31.1160	-0.121015	4.50335e-187	9.0067e-184	0.058	0.146	hypothetical protein, unknown function	N/A
0	34.6625	1.82688	LmjF.34.2780	-0.121167	1.55528e-06	0.00311056	0.459	0.619	40S ribosomal protein S19 protein, putative	structural constituent of ribosome
0	34.6625	1.82688	LmjF.32.0020	-0.121233	1.56981e-28	3.13963e-25	0.123	0.381	nuclear segregation protein, putative	N/A
0	34.6625	1.82688	LmjF.15.1207	-0.121262	1.80784e-195	3.61568e-192	0.053	0.136	60S acidic ribosomal protein P2	structural constituent of ribosome
0	34.6625	1.82688	LmjF.36.2610	-0.121766	7.95686e-17	1.59137e-13	0.122	0.366	folylpolyglutamate synthetase	ATP binding;ligase activity;tetrahydrofolylpolyglutamate synthase activity
0	34.6625	1.82688	LmjF.11.0960	-0.122133	6.17749e-08	0.00012355	0.502	0.651	40S ribosomal protein S5	structural constituent of ribosome
0	34.6625	1.82688	LmjF.36.4150	-0.122151	3.44955e-296	6.8991e-293	0.2	0.596	hypothetical protein, conserved	N/A
0	34.6625	1.82688	LmjF.34.4020	-0.12216	1.70325e-26	3.40649e-23	0.066	0.233	hypothetical protein, conserved	N/A
0	34.6625	1.82688	LmjF.28.2555	-0.12229	3.25333e-11	6.50667e-08	0.718	0.814	40S ribosomal protein S17, putative	structural constituent of ribosome
0	34.6625	1.82688	LmjF.36.6525	-0.122542	2.02378e-218	4.04755e-215	0.128	0.486	hypothetical protein, conserved	N/A
0	34.6625	1.82688	LmjF.10.0890	-0.122622	4.8518e-25	9.70359e-22	0.142	0.29	FKBP-type peptidyl-prolyl cis-trans isomerase, putative	peptidyl-prolyl cis-trans isomerase activity
0	34.6625	1.82688	LmjF.21.0380	-0.122857	2.82846e-112	5.65692e-109	0.169	0.485	Protein of unknown function (DUF667), putative	N/A
0	34.6625	1.82688	LmjF.20.0890	-0.122958	1.2552e-16	2.51041e-13	0.027	0.214	Transcription elongation factor 1 domain-containing protein	N/A
0	34.6625	1.82688	LmjF.36.0320	-0.122993	1.88595e-228	3.7719e-225	0.182	0.544	proteasome subunit beta type-2, putative	threonine-type endopeptidase activity
0	34.6625	1.82688	LmjF.25.0260	-0.122999	3.95556e-10	7.91112e-07	0.08	0.322	Dynein light chain 1, cytoplasmic, putative	N/A
0	34.6625	1.82688	LmjF.35.5040	-0.123081	1.31688e-36	2.63377e-33	0.265	0.52	polyadenylate-binding protein 1	RNA binding;nucleic acid binding
0	34.6625	1.82688	LmjF.36.1070	-0.123093	7.07203e-12	1.41441e-08	0.222	0.368	ribosomal protein L24, putative	N/A
0	34.6625	1.82688	LmjF.19.0140	-0.123221	1.99943e-86	3.99886e-83	0.187	0.485	Associated kinase of Tb14-3-3, putative	ATP binding;protein kinase activity
0	34.6625	1.82688	LmjF.05.1200	-0.123309	4.12837e-64	8.25674e-61	0.046	0.19	prefoldin subunit, putative	unfolded protein binding
0	34.6625	1.82688	LmjF.36.1290	-0.124386	4.78785e-11	9.57571e-08	0.092	0.334	hypothetical protein, conserved	N/A
0	34.6625	1.82688	LmjF.29.2610	-0.12439	2.24166e-08	4.48332e-05	0.088	0.274	hypothetical protein, conserved	N/A
0	34.6625	1.82688	LmjF.31.1620	-0.124656	1.01834e-83	2.03668e-80	0.064	0.191	Protein of unknown function DUF84, putative	N/A
0	34.6625	1.82688	LmjF.27.1850	-0.124669	6.49064e-107	1.29813e-103	0.052	0.172	paraflagellar rod protein 5, putative	calmodulin binding;protein binding
0	34.6625	1.82688	LmjF.08.0330	-0.124685	2.54209e-16	5.08419e-13	0.053	0.307	Tim10/DDP family zinc finger, putative	N/A
0	34.6625	1.82688	LmjF.14.0720	-0.124733	5.57684e-24	1.11537e-20	0.052	0.315	fatty acid elongase, putative	N/A
0	34.6625	1.82688	LmjF.20.1600	-0.125395	5.30781e-79	1.06156e-75	0.041	0.18	hypothetical protein, conserved	protein binding
0	34.6625	1.82688	LmjF.36.1980	-0.125886	2.50105e-15	5.0021e-12	0.039	0.224	serine/threonine protein phosphatase 2B catalytic subunit A2, putative	calmodulin-dependent protein phosphatase activity;hydrolase activity
0	34.6625	1.82688	LmjF.24.1850	-0.126034	1.90212e-19	3.80425e-16	0.056	0.233	hypothetical predicted multi-pass transmembrane protein	N/A
0	34.6625	1.82688	LmjF.04.0040	-0.126124	1.22472e-27	2.44944e-24	0.151	0.294	hypothetical protein	N/A
0	34.6625	1.82688	LmjF.18.1580	-0.12631	6.38553e-161	1.27711e-157	0.137	0.471	nonspecific nucleoside hydrolase	hydrolase activity, hydrolyzing N-glycosyl compounds
0	34.6625	1.82688	LmjF.36.1340	-0.12649	4.89997e-70	9.79993e-67	0.091	0.217	N-acetyltransferase subunit Nat1, putative	protein binding
0	34.6625	1.82688	LmjF.26.2110	-0.126626	2.61575e-234	5.23151e-231	0.101	0.464	protein kinase, putative	ATP binding;protein kinase activity
0	34.6625	1.82688	LmjF.36.2350	-0.127016	1.60941e-39	3.21882e-36	0.079	0.353	glyceraldehyde 3-phosphate dehydrogenase, cytosolic, putative	N/A
0	34.6625	1.82688	LmjF.14.1095	-0.127737	2.00869e-51	4.01738e-48	0.064	0.212	hypothetical protein, unknown function	N/A
0	34.6625	1.82688	LmjF.34.1370	-0.128101	6.08245e-168	1.21649e-164	0.026	0.131	hypothetical protein, conserved	N/A
0	34.6625	1.82688	LmjF.09.0210	-0.128381	1.75145e-145	3.50291e-142	0.345	0.687	Domain of unknown function (DUF4586), putative	N/A
0	34.6625	1.82688	LmjF.34.1190	-0.128731	5.39581e-110	1.07916e-106	0.062	0.176	ATP-dependent RNA helicase-like protein	ATP binding;helicase activity;nucleic acid binding
0	34.6625	1.82688	LmjF.12.0540	-0.12891	3.79326e-09	7.58653e-06	0.113	0.29	Present in the outer mitochondrial membrane proteome 18	N/A
0	34.6625	1.82688	LmjF.27.2450	-0.128954	9.90854e-256	1.98171e-252	0.139	0.512	hypothetical protein, conserved	N/A
0	34.6625	1.82688	LmjF.28.0570	-0.129027	1.74438e-07	0.000348877	0.084	0.322	major surface protease gp63, putative	metalloendopeptidase activity
0	34.6625	1.82688	LmjF.31.2115	-0.129437	6.88646e-11	1.37729e-07	0.06	0.247	hypothetical protein, unknown function	N/A
0	34.6625	1.82688	LmjF.36.5150	-0.129685	3.32183e-195	6.64366e-192	0.185	0.541	kinesin-D	ATP binding;microtubule binding;microtubule motor activity
0	34.6625	1.82688	LmjF.30.0620	-0.129849	2.9583e-133	5.91661e-130	0.021	0.139	ribosome biogenesis regulatory protein (RRS1), putative	N/A
0	34.6625	1.82688	LmjF.19.1610	-0.130177	7.6516e-09	1.53032e-05	0.029	0.226	protein kinase, putative	ATP binding;protein kinase activity
0	34.6625	1.82688	LmjF.26.1010	-0.130628	1.27791e-131	2.55582e-128	0.048	0.159	hypothetical protein, conserved	N/A
0	34.6625	1.82688	LmjF.17.0370	-0.130931	5.10885e-195	1.02177e-191	0.044	0.131	hypothetical protein, unknown function	N/A
0	34.6625	1.82688	LmjF.26.0830	-0.131602	3.67998e-45	7.35995e-42	0.089	0.232	aspartate--ammonia ligase, putative	aspartate-ammonia ligase activity
0	34.6625	1.82688	LmjF.32.0400	-0.131653	1.05603e-104	2.11207e-101	0.338	0.642	ATP-dependent RNA helicase HEL67	ATP binding;helicase activity;nucleic acid binding
0	34.6625	1.82688	LmjF.31.1560	-0.132235	1.56725e-93	3.13449e-90	0.032	0.163	hypothetical protein, conserved	N/A
0	34.6625	1.82688	LmjF.32.2750	-0.132614	9.61328e-09	1.92266e-05	0.106	0.343	Guanine nucleotide exchange factor in Golgi transport N-terminal/Sec7 domain containing protein, putative	N/A
0	34.6625	1.82688	LmjF.15.0590	-0.134005	3.49226e-10	6.98453e-07	0.047	0.238	hypothetical protein, conserved	N/A
0	34.6625	1.82688	LmjF.13.0260	-0.134055	5.00452e-13	1.0009e-09	0.07	0.253	N-acetyltransferase subunit ARD1, putative	N-acetyltransferase activity
0	34.6625	1.82688	LmjF.21.0710	-0.134606	3.17618e-53	6.35236e-50	0.1	0.234	ATP-binding cassette protein subfamily E, member 1, putative	ATP binding;ATPase activity
0	34.6625	1.82688	LmjF.26.0190	-0.134647	3.53094e-105	7.06189e-102	0.034	0.16	Scaffold protein Nfu/NifU N terminal/NifU-like domain containing protein, putative	iron ion binding;iron-sulfur cluster binding
0	34.6625	1.82688	LmjF.31.2260	-0.134739	4.76363e-98	9.52725e-95	0.081	0.195	aminopeptidase, putative	metallopeptidase activity;zinc ion binding
0	34.6625	1.82688	LmjF.28.0980	-0.134775	2.77123e-71	5.54247e-68	0.061	0.195	P27 protein, putative	N/A
0	34.6625	1.82688	LmjF.36.3830	-0.134975	1.18115e-19	2.3623e-16	0.095	0.261	Zinc finger, C3HC4 type (RING finger), putative	N/A
0	34.6625	1.82688	LmjF.30.3235	-0.135083	1.02052e-233	2.04104e-230	0.044	0.404	hypothetical protein, conserved	N/A
0	34.6625	1.82688	LmjF.18.0300	-0.135197	2.69208e-08	5.38417e-05	0.097	0.331	hypothetical protein, conserved	N/A
0	34.6625	1.82688	LmjF.31.2850	-0.135437	3.01789e-88	6.03577e-85	0.039	0.173	ribosomal protein l7/l12-like protein	structural constituent of ribosome
0	34.6625	1.82688	LmjF.31.1260	-0.13557	5.53389e-49	1.10678e-45	0.042	0.197	Microtubule-binding stalk of dynein motor, putative	ATP-dependent microtubule motor activity, minus-end-directed
0	34.6625	1.82688	LmjF.25.0720	-0.1356	2.44518e-120	4.89037e-117	0.078	0.183	eukaryotic initiation factor 5a, putative	RNA binding;ribosome binding;translation elongation factor activity
0	34.6625	1.82688	LmjF.36.1080	-0.13561	2.92271e-245	5.84541e-242	0.023	0.105	hypothetical protein, conserved	N/A
0	34.6625	1.82688	LmjF.31.1760	-0.135687	1.02013e-205	2.04027e-202	0.207	0.562	hypothetical protein, unknown function	N/A
0	34.6625	1.82688	LmjF.25.1440	-0.13571	1.63187e-183	3.26374e-180	0.095	0.438	hypothetical protein, conserved	nucleic acid binding
0	34.6625	1.82688	LmjF.36.1250	-0.135769	2.19568e-38	4.39137e-35	0.522	0.738	40S ribosomal protein S9, putative	RNA binding;rRNA binding;structural constituent of ribosome
0	34.6625	1.82688	LmjF.22.1230	-0.135897	3.79211e-14	7.58421e-11	0.058	0.243	hypothetical protein, conserved	N/A
0	34.6625	1.82688	LmjF.24.1900	-0.136087	8.96047e-124	1.79209e-120	0.058	0.169	WD domain, G-beta repeat/PFU (PLAA family ubiquitin binding), putative	protein binding
0	34.6625	1.82688	LmjF.14.1370	-0.137113	3.62462e-10	7.24924e-07	0.14	0.314	tyrosyl-tRNA synthetase, putative	ATP binding;aminoacyl-tRNA ligase activity;nucleotide binding
0	34.6625	1.82688	LmjF.28.0600	-0.137368	6.51712e-28	1.30342e-24	0.089	0.351	hypothetical protein, conserved	N/A
0	34.6625	1.82688	LmjF.36.3530	-0.137652	1.65548e-112	3.31097e-109	0.271	0.584	polyubiquitin, putative	protein binding
0	34.6625	1.82688	LmjF.28.2150	-0.137704	1.02379e-147	2.04758e-144	0.049	0.15	hypothetical protein, conserved	protein binding
0	34.6625	1.82688	LmjF.11.0020	-0.137734	9.30732e-68	1.86146e-64	0.024	0.172	Endoplasmic Reticulum-Golgi Intermediate Compartment (ERGIC)/Endoplasmic reticulum vesicle transporter, putative	N/A
0	34.6625	1.82688	LmjF.36.5390	-0.138013	3.75784e-43	7.51568e-40	0.1	0.373	phosphoribosylpyrophosphate synthetase, putative	magnesium ion binding;ribose phosphate diphosphokinase activity
0	34.6625	1.82688	LmjF.04.0460	-0.138166	5.79787e-136	1.15957e-132	0.075	0.174	adenylosuccinate lyase, putative	N6-(1,2-dicarboxyethyl)AMP AMP-lyase (fumarate-forming) activity;catalytic activity
0	34.6625	1.82688	LmjF.13.0050	-0.138419	1.12179e-121	2.24357e-118	0.048	0.162	ribonuclease HII, putative	RNA binding;RNA-DNA hybrid ribonuclease activity;nucleic acid binding
0	34.6625	1.82688	LmjF.32.3850	-0.139047	3.31131e-08	6.62261e-05	0.115	0.351	hypothetical protein, unknown function	N/A
0	34.6625	1.82688	LmjF.17.1330	-0.139429	5.71054e-143	1.14211e-139	0.046	0.151	hypothetical protein, conserved	N/A
0	34.6625	1.82688	LmjF.24.0070	-0.139474	9.37421e-34	1.87484e-30	0.038	0.206	hypothetical protein, conserved	N/A
0	34.6625	1.82688	LmjF.32.2900	-0.140026	1.9604e-208	3.92079e-205	0.131	0.489	outer dynein arm docking complex, putative	N/A
0	34.6625	1.82688	LmjF.11.0840	-0.1403	2.26133e-23	4.52267e-20	0.088	0.347	Alpha/beta hydrolase family, putative	N/A
0	34.6625	1.82688	LmjF.27.1780	-0.140873	3.77037e-30	7.54075e-27	0.084	0.241	casein kinase I-like protein	ATP binding;protein kinase activity
0	34.6625	1.82688	LmjF.28.0810	-0.140978	3.61507e-57	7.23015e-54	0.043	0.192	RNA polymerase B subunit RPB8, putative	N/A
0	34.6625	1.82688	LmjF.16.0150	-0.141149	6.52054e-219	1.30411e-215	0.095	0.454	hypothetical protein, conserved	N/A
0	34.6625	1.82688	LmjF.35.1890	-0.141868	1.56103e-15	3.12206e-12	0.545	0.712	60S ribosomal protein L5, putative	5S rRNA binding;structural constituent of ribosome
0	34.6625	1.82688	LmjF.32.3100	-0.142423	5.94054e-117	1.18811e-113	0.047	0.165	hypothetical protein, unknown function	N/A
0	34.6625	1.82688	LmjF.31.0560	-0.143293	5.28664e-140	1.05733e-136	0.057	0.161	mevalonate kinase, putative	ATP binding;mevalonate kinase activity
0	34.6625	1.82688	LmjF.24.0200	-0.143431	2.01104e-220	4.02209e-217	0.019	0.108	transcription elongation factor-like protein	N/A
0	34.6625	1.82688	LmjF.32.3280	-0.143638	1.17847e-35	2.35695e-32	0.111	0.258	hypothetical protein, conserved	N/A
0	34.6625	1.82688	LmjF.35.2840	-0.144182	1.06202e-58	2.12404e-55	0.06	0.203	aminotransferase, putative	catalytic activity;cysteine desulfurase activity;pyridoxal phosphate binding
0	34.6625	1.82688	LmjF.12.0590	-0.144598	1.05226e-67	2.10452e-64	0.04	0.335	Fusaric acid resistance protein-like, putative	N/A
0	34.6625	1.82688	LmjF.21.1720	-0.146438	6.2849e-16	1.25698e-12	0.258	0.479	60S ribosomal protein L32	structural constituent of ribosome
0	34.6625	1.82688	LmjF.31.1270	-0.146695	4.21168e-106	8.42336e-103	0.22	0.534	p-glycoprotein e	ATP binding;ATPase activity;ATPase-coupled transmembrane transporter activity
0	34.6625	1.82688	LmjF.10.1190	-0.146766	9.68445e-46	1.93689e-42	0.106	0.387	flagellar protofilament ribbon protein-like protein	N/A
0	34.6625	1.82688	LmjF.31.2370	-0.146864	8.42595e-14	1.68519e-10	0.058	0.241	hypothetical protein, conserved	protein binding
0	34.6625	1.82688	LmjF.26.1150	-0.147025	8.35333e-09	1.67067e-05	0.03	0.276	hypothetical protein, conserved	N/A
0	34.6625	1.82688	LmjF.35.3490	-0.147117	9.79217e-78	1.95843e-74	0.123	0.42	hypothetical protein, conserved	N/A
0	34.6625	1.82688	LmjF.15.1270	-0.147261	8.70865e-21	1.74173e-17	0.106	0.268	hypothetical protein, conserved	N/A
0	34.6625	1.82688	LmjF.17.0630	-0.14728	1.10929e-47	2.21859e-44	0.052	0.333	hypothetical protein, unknown function	N/A
0	34.6625	1.82688	LmjF.33.0510	-0.147455	2.04882e-42	4.09765e-39	0.07	0.224	SET domain containing protein, putative	protein binding
0	34.6625	1.82688	LmjF.28.1310	-0.147844	1.20683e-13	2.41366e-10	0.121	0.362	ATP-dependent RNA helicase, putative	ATP binding;helicase activity;nucleic acid binding
0	34.6625	1.82688	LmjF.33.1650	-0.148904	3.12648e-18	6.25297e-15	0.042	0.227	hypothetical protein, conserved	N/A
0	34.6625	1.82688	LmjF.27.1970	-0.149105	2.88568e-18	5.77137e-15	0.071	0.324	small nuclear ribonucleoprotein protein, putative	N/A
0	34.6625	1.82688	LmjF.16.0750	-0.149113	4.86106e-15	9.72213e-12	0.093	0.34	hypothetical protein, unknown function	N/A
0	34.6625	1.82688	LmjF.36.3235	-0.14985	2.16228e-50	4.32456e-47	0.031	0.189	hypothetical protein, conserved	N/A
0	34.6625	1.82688	LmjF.29.2350	-0.151335	1.18842e-55	2.37685e-52	0.037	0.189	Ubiquinone biosynthesis protein COQ7, putative	monooxygenase activity
0	34.6625	1.82688	LmjF.23.0560	-0.152279	1.01886e-229	2.03772e-226	0.233	0.605	kinesin-C	ATP binding;microtubule binding;microtubule motor activity
0	34.6625	1.82688	LmjF.32.2390	-0.152363	9.30088e-06	0.0186018	0.057	0.257	hypothetical protein, conserved	N/A
0	34.6625	1.82688	LmjF.26.1500	-0.152528	2.01039e-46	4.02078e-43	0.116	0.25	hypothetical protein, unknown function	N/A
0	34.6625	1.82688	LmjF.36.5110	-0.152531	3.50865e-13	7.0173e-10	0.068	0.317	Domain of unknown function (DUF4496), putative	N/A
0	34.6625	1.82688	LmjF.22.0260	-0.153708	3.07674e-31	6.15348e-28	0.162	0.418	translocon-associated protein (TRAP), alpha subunit, putative	N/A
0	34.6625	1.82688	LmjF.16.0540	-0.154504	1.13779e-91	2.27557e-88	0.068	0.193	aspartate carbamoyltransferase, putative	amino acid binding;aspartate carbamoyltransferase activity;carboxyl- or carbamoyltransferase activity
0	34.6625	1.82688	LmjF.34.1070	-0.1555	2.13443e-44	4.26885e-41	0.079	0.362	Lipase (class 3), putative	N/A
0	34.6625	1.82688	LmjF.27.1980	-0.156047	5.37986e-99	1.07597e-95	0.064	0.184	FtsJ cell division protein, putative	methyltransferase activity;rRNA methyltransferase activity
0	34.6625	1.82688	LmjF.28.2650	-0.156246	4.06686e-28	8.13372e-25	0.095	0.256	membrane-bound acid phosphatase, putative	N/A
0	34.6625	1.82688	LmjF.36.4220	-0.156474	1.46786e-266	2.93573e-263	0.101	0.473	hypothetical protein, conserved	N/A
0	34.6625	1.82688	LmjF.36.6460	-0.156565	6.3005e-98	1.2601e-94	0.019	0.153	tartrate-sensitive acid phosphatase acp-3.2, putative	N/A
0	34.6625	1.82688	LmjF.28.2565	-0.157117	1.87474e-148	3.74948e-145	0.016	0.131	hypothetical protein, conserved	N/A
0	34.6625	1.82688	LmjF.27.2305	-0.157624	3.12251e-24	6.24502e-21	0.068	0.334	MORN repeat, putative	N/A
0	34.6625	1.82688	LmjF.06.1190	-0.157854	6.21246e-54	1.24249e-50	0.095	0.232	thioredoxin, putative	N/A
0	34.6625	1.82688	LmjF.21.1130	-0.158371	1.06949e-27	2.13899e-24	0.047	0.219	hypothetical protein, conserved	N/A
0	34.6625	1.82688	LmjF.05.0460	-0.158814	1.42483e-72	2.84967e-69	0.052	0.189	GTPase, putative	GTP binding
0	34.6625	1.82688	LmjF.15.0540	-0.159583	7.83195e-73	1.56639e-69	0.107	0.23	hypothetical protein, conserved	N/A
0	34.6625	1.82688	LmjF.12.1230	-0.159594	3.75448e-54	7.50896e-51	0.043	0.194	SNARE associated Golgi protein, putative	N/A
0	34.6625	1.82688	LmjF.29.0930	-0.159605	2.77701e-87	5.55402e-84	0.028	0.167	ABC transporter-like protein	ATP binding
0	34.6625	1.82688	LmjF.17.0083	-0.159607	1.40646e-17	2.81292e-14	0.876	0.912	elongation factor 1-alpha	GTP binding;GTPase activity;translation elongation factor activity
0	34.6625	1.82688	LmjF.34.3645	-0.159966	5.71486e-24	1.14297e-20	0.044	0.219	hypothetical protein (pseudogene)	N/A
0	34.6625	1.82688	LmjF.31.0255	-0.160061	2.32712e-16	4.65425e-13	0.069	0.246	hypothetical protein, conserved	N/A
0	34.6625	1.82688	LmjF.28.2780	-0.160505	2.35562e-19	4.71125e-16	0.786	0.858	heat-shock protein hsp70, putative	N/A
0	34.6625	1.82688	LmjF.27.2335	-0.160891	2.74027e-104	5.48054e-101	0.038	0.161	hypothetical protein, conserved	N/A
0	34.6625	1.82688	LmjF.36.1680	-0.161371	3.27556e-29	6.55113e-26	0.157	0.421	hypothetical protein, conserved	N/A
0	34.6625	1.82688	LmjF.10.0370	-0.161668	4.44331e-28	8.88661e-25	0.167	0.422	folate/biopterin transporter, putative	N/A
0	34.6625	1.82688	LmjF.36.6210	-0.161713	2.40899e-05	0.0481798	0.102	0.293	Vps54-like protein, putative	N/A
0	34.6625	1.82688	LmjF.21.1050	-0.162137	3.57244e-30	7.14488e-27	0.564	0.744	60S ribosomal protein L9, putative	rRNA binding;structural constituent of ribosome
0	34.6625	1.82688	LmjF.21.1640	-0.162155	1.84971e-100	3.69942e-97	0.032	0.162	hypothetical protein, conserved	N/A
0	34.6625	1.82688	LmjF.26.1980	-0.162366	7.83491e-272	1.56698e-268	0.179	0.563	hypothetical protein, conserved	N/A
0	34.6625	1.82688	LmjF.36.5180	-0.163182	2.99771e-58	5.99543e-55	0.114	0.241	aldehyde dehydrogenase, putative	oxidoreductase activity;oxidoreductase activity, acting on the aldehyde or oxo group of donors, NAD or NADP as acceptor
0	34.6625	1.82688	LmjF.26.1940	-0.163301	3.75857e-189	7.51714e-186	0.008	0.107	Thioesterase-like superfamily, putative	N/A
0	34.6625	1.82688	LmjF.24.0100	-0.163389	1.33646e-73	2.67292e-70	0.098	0.395	Calmodulin-binding, putative	N/A
0	34.6625	1.82688	LmjF.23.0050	-0.164299	5.63353e-16	1.12671e-12	0.044	0.227	cyclophilin 11, putative	peptidyl-prolyl cis-trans isomerase activity
0	34.6625	1.82688	LmjF.15.0630	-0.164855	6.00371e-102	1.20074e-98	0.147	0.46	hypothetical protein, unknown function	N/A
0	34.6625	1.82688	LmjF.03.0920	-0.164973	6.04826e-206	1.20965e-202	0.01	0.103	Got1/Sft2-like family, putative	N/A
0	34.6625	1.82688	LmjF.04.1200	-0.164994	1.17269e-193	2.34538e-190	0.064	0.413	hypothetical protein, conserved	N/A
0	34.6625	1.82688	LmjF.33.1355	-0.165304	4.58552e-162	9.17103e-159	0.051	0.151	iron-sulfur cluster assembly protein, putative	N/A
0	34.6625	1.82688	LmjF.29.0670	-0.165864	4.79186e-165	9.58372e-162	0.032	0.137	hypothetical protein, conserved	N/A
0	34.6625	1.82688	LmjF.27.2370	-0.166175	1.28681e-238	2.57362e-235	0.04	0.112	hypothetical protein, conserved	N/A
0	34.6625	1.82688	LmjF.35.2880	-0.166745	7.40592e-23	1.48118e-19	0.024	0.205	Sybindin-like family, putative	N/A
0	34.6625	1.82688	LmjF.16.1470	-0.166865	1.0761e-145	2.1522e-142	0.191	0.524	kinesin, putative	ATP binding;microtubule binding;microtubule motor activity
0	34.6625	1.82688	LmjF.06.1040	-0.166942	3.98199e-209	7.96399e-206	0.037	0.123	hypothetical protein, conserved	N/A
0	34.6625	1.82688	LmjF.31.1190	-0.167084	1.39841e-18	2.79681e-15	0.04	0.221	cytochrome b5-like Heme/Steroid binding domain containing protein, putative	N/A
0	34.6625	1.82688	LmjF.23.0200	-0.167437	1.36308e-14	2.72616e-11	0.164	0.403	endoribonuclease L-PSP (pb5), putative	N/A
0	34.6625	1.82688	LmjF.23.1590	-0.16807	2.56325e-247	5.1265e-244	0.024	0.103	oxidoreductase-like protein	oxidoreductase activity
0	34.6625	1.82688	LmjF.30.0330	-0.168301	1.0294e-131	2.0588e-128	0.051	0.16	Rab-GTPase-TBC domain containing protein, putative	N/A
0	34.6625	1.82688	LmjF.12.0330	-0.168344	8.58402e-228	1.7168e-224	0.044	0.121	hypothetical protein, unknown function	N/A
0	34.6625	1.82688	LmjF.01.0590	-0.168611	3.15363e-09	6.30727e-06	0.055	0.3	mitochondrial RNA editing ligase 1	ATP binding;RNA ligase (ATP) activity;ligase activity
0	34.6625	1.82688	LmjF.16.0590	-0.168702	2.18527e-13	4.37053e-10	0.133	0.303	carbamoyl-phosphate synthase, putative	ATP binding;argininosuccinate synthase activity;carbamoyl-phosphate synthase (glutamine-hydrolyzing) activity;metal ion binding
0	34.6625	1.82688	LmjF.33.3270	-0.168935	7.46385e-48	1.49277e-44	0.105	0.245	delta-12 fatty acid desaturase	N/A
0	34.6625	1.82688	LmjF.19.0930	-0.169115	1.44828e-221	2.89657e-218	0.035	0.118	hypothetical protein, conserved	N/A
0	34.6625	1.82688	LmjF.03.0220	-0.169429	8.9789e-55	1.79578e-51	0.062	0.21	hypothetical protein, conserved	N/A
0	34.6625	1.82688	LmjF.10.0080	-0.169628	2.16883e-156	4.33765e-153	0.05	0.148	hypothetical protein, unknown function	N/A
0	34.6625	1.82688	LmjF.36.5700	-0.169787	1.26869e-13	2.53739e-10	0.082	0.261	hypothetical protein, conserved	N/A
0	34.6625	1.82688	LmjF.16.1150	-0.169848	3.95874e-96	7.91748e-93	0.03	0.162	hypothetical protein, conserved	N/A
0	34.6625	1.82688	LmjF.14.0500	-0.170853	8.43807e-145	1.68761e-141	0.025	0.139	hypothetical protein, unknown function	N/A
0	34.6625	1.82688	LmjF.35.4800	-0.170917	2.57418e-18	5.14836e-15	0.153	0.404	AMP deaminase, putative	AMP deaminase activity;deaminase activity
0	34.6625	1.82688	LmjF.36.2970	-0.171122	1.16464e-77	2.32928e-74	0.03	0.171	hypothetical protein, conserved	N/A
0	34.6625	1.82688	LmjF.12.0110	-0.171882	1.04034e-157	2.08069e-154	0.042	0.143	hypothetical protein, conserved	metal ion binding
0	34.6625	1.82688	LmjF.32.2610	-0.172324	3.90574e-47	7.81148e-44	0.287	0.553	Tip Of Extending FAZ protein 1	N/A
0	34.6625	1.82688	LmjF.19.1000	-0.172754	4.73439e-215	9.46878e-212	0.027	0.112	glycerol uptake protein, putative	N/A
0	34.6625	1.82688	LmjF.07.0450	-0.172834	9.66512e-218	1.93302e-214	0.015	0.105	hypothetical protein, conserved	N/A
0	34.6625	1.82688	LmjF.32.3740	-0.172987	1.06362e-91	2.12724e-88	0.049	0.177	hypothetical protein, conserved	N/A
0	34.6625	1.82688	LmjF.26.2350	-0.173434	8.06543e-23	1.61309e-19	0.058	0.231	hypothetical protein, conserved	N/A
0	34.6625	1.82688	LmjF.02.0160	-0.173744	2.53983e-204	5.07966e-201	0.035	0.125	phosphoglycan beta 1,3 galactosyltransferase	N/A
0	34.6625	1.82688	LmjF.26.0180	-0.173769	1.95104e-07	0.000390208	0.383	0.559	60S ribosomal protein L7, putative	structural constituent of ribosome
0	34.6625	1.82688	LmjF.02.0310	-0.175278	0	0	0.15	0.567	Soluble NSF attachment protein, SNAP, putative	protein binding
0	34.6625	1.82688	LmjF.20.0240	-0.175394	1.22285e-35	2.44571e-32	0.102	0.252	transmembrane protein, putative	N/A
0	34.6625	1.82688	LmjF.20.1185	-0.175657	5.51841e-23	1.10368e-19	0.032	0.213	calpain-like cysteine peptidase, putative	calcium-dependent cysteine-type endopeptidase activity
0	34.6625	1.82688	LmjF.04.0930	-0.176086	1.37839e-11	2.75677e-08	0.059	0.248	hypothetical protein, conserved	N/A
0	34.6625	1.82688	LmjF.16.0140	-0.176218	2.54161e-155	5.08322e-152	0.057	0.155	eukaryotic translation initiation factor 1A, putative	RNA binding;translation initiation factor activity
0	34.6625	1.82688	LmjF.10.0830	-0.176334	2.93241e-61	5.86483e-58	0.089	0.226	serine/threonine-protein kinase, putative	ATP binding;protein kinase activity
0	34.6625	1.82688	LmjF.22.1560	-0.176735	1.82397e-120	3.64794e-117	0.033	0.155	60S ribosomal protein L14, putative	RNA binding;structural constituent of ribosome
0	34.6625	1.82688	LmjF.31.0190	-0.176832	1.11968e-148	2.23936e-145	0.053	0.154	nucleolar protein, putative	RNA binding;S-adenosylmethionine-dependent methyltransferase activity;methyltransferase activity
0	34.6625	1.82688	LmjF.36.4210	-0.176941	6.61512e-17	1.32302e-13	0.059	0.315	WD domain, G-beta repeat/Utp21 specific WD40 associated putative domain containing protein, putative	catalytic activity;protein binding
0	34.6625	1.82688	LmjF.29.1270	-0.177921	1.78742e-08	3.57484e-05	0.061	0.252	Heat shock protein 100 kDa	ATP binding;ATPase activity
0	34.6625	1.82688	LmjF.36.6870	-0.178052	5.43358e-27	1.08672e-23	0.055	0.225	EVE domain containing protein, putative	N/A
0	34.6625	1.82688	LmjF.20.0910	-0.178595	9.0751e-132	1.81502e-128	0.053	0.161	hypothetical protein, conserved	N/A
0	34.6625	1.82688	LmjF.29.0190	-0.17886	1.10758e-76	2.21515e-73	0.03	0.172	hypothetical protein, conserved	N/A
0	34.6625	1.82688	LmjF.26.2610	-0.179465	1.28274e-193	2.56548e-190	0.026	0.123	FAD binding domain containing protein, putative	FAD binding
0	34.6625	1.82688	LmjF.23.1267	-0.179564	3.76979e-211	7.53958e-208	0.044	0.126	hypothetical protein, unknown function	N/A
0	34.6625	1.82688	LmjF.32.0850	-0.180121	5.27601e-154	1.0552e-150	0.052	0.154	polypyrimidine tract-binding protein, putative	nucleic acid binding
0	34.6625	1.82688	LmjF.06.1000	-0.180281	6.8338e-26	1.36676e-22	0.056	0.228	SET domain containing protein, putative	protein binding
0	34.6625	1.82688	LmjF.05.0450	-0.180339	7.46989e-39	1.49398e-35	0.117	0.257	hypothetical protein, conserved	N/A
0	34.6625	1.82688	LmjF.32.1940	-0.180546	1.94961e-32	3.89923e-29	0.091	0.251	DnaJ homolog, putative	unfolded protein binding
0	34.6625	1.82688	LmjF.31.1960	-0.181103	1.60703e-13	3.21406e-10	0.066	0.315	tryparedoxin 3, putative	N/A
0	34.6625	1.82688	LmjF.28.2250	-0.181148	1.55949e-07	0.000311898	0.082	0.272	glycosomal membrane protein-like protein	N/A
0	34.6625	1.82688	LmjF.36.6620	-0.181156	6.96768e-55	1.39354e-51	0.074	0.215	hypothetical protein, conserved	N/A
0	34.6625	1.82688	LmjF.31.1640	-0.182074	3.63125e-136	7.26249e-133	0.071	0.172	thiolase protein-like protein	transferase activity, transferring acyl groups;transferase activity, transferring acyl groups other than amino-acyl groups
0	34.6625	1.82688	LmjF.15.0820	-0.182077	2.89849e-99	5.79698e-96	0.068	0.186	GDP dissociation inhibitor, putative	GDP-dissociation inhibitor activity
0	34.6625	1.82688	LmjF.22.0060	-0.18231	4.6112e-39	9.2224e-36	0.111	0.384	transcription factor-like protein	DNA-binding transcription factor activity;nucleic acid binding;zinc ion binding
0	34.6625	1.82688	LmjF.16.0460	-0.182767	2.19619e-25	4.39237e-22	0.386	0.602	60S ribosomal protein L21, putative	structural constituent of ribosome
0	34.6625	1.82688	LmjF.04.0990	-0.183393	8.56515e-113	1.71303e-109	0.073	0.184	hypothetical protein, conserved	N/A
0	34.6625	1.82688	LmjF.32.3910	-0.183551	1.87395e-253	3.7479e-250	0.025	0.104	Endoplasmic Reticulum-Golgi Intermediate Compartment (ERGIC)/Endoplasmic reticulum vesicle transporter, putative	N/A
0	34.6625	1.82688	LmjF.33.0160	-0.183566	3.26361e-57	6.52722e-54	0.051	0.197	hypothetical protein, unknown function	N/A
0	34.6625	1.82688	LmjF.28.2590	-0.184242	1.26122e-22	2.52243e-19	0.082	0.342	ADP-ribosylglycohydrolase, putative	N/A
0	34.6625	1.82688	LmjF.35.0420	-0.184246	3.02344e-12	6.04688e-09	0.467	0.638	40S ribosomal protein S3A, putative	structural constituent of ribosome
0	34.6625	1.82688	LmjF.30.2600	-0.185358	2.49746e-137	4.99492e-134	0.066	0.168	formate--tetrahydrofolate ligase	ATP binding;formate-tetrahydrofolate ligase activity
0	34.6625	1.82688	LmjF.08.1100	-0.186299	9.22213e-132	1.84443e-128	0.062	0.167	hypothetical protein, conserved	N/A
0	34.6625	1.82688	LmjF.04.1110	-0.186713	1.90318e-235	3.80635e-232	0.034	0.112	proton motive ATPase, putative	nucleotide binding
0	34.6625	1.82688	LmjF.23.0310	-0.187254	4.62905e-98	9.2581e-95	0.017	0.152	hypothetical protein, conserved	N/A
0	34.6625	1.82688	LmjF.10.0380	-0.187457	1.95122e-07	0.000390244	0.927	0.951	folate/biopterin transporter, putative	N/A
0	34.6625	1.82688	LmjF.33.1750	-0.187465	4.57812e-202	9.15623e-199	0.039	0.127	macrophage migration inhibitory factor-like protein	N/A
0	34.6625	1.82688	LmjF.32.2370	-0.188554	1.70803e-50	3.41607e-47	0.037	0.194	aquaporin-like protein	channel activity
0	34.6625	1.82688	LmjF.36.1140	-0.189034	8.87207e-19	1.77441e-15	0.114	0.278	short chain 3-hydroxyacyl-CoA dehydrogenase, putative	3-hydroxyacyl-CoA dehydrogenase activity;NAD+ binding;oxidoreductase activity
0	34.6625	1.82688	LmjF.32.3130	-0.189583	1.37428e-11	2.74857e-08	0.523	0.674	ribosomal protein L3, putative	structural constituent of ribosome
0	34.6625	1.82688	LmjF.17.0260	-0.190744	1.43058e-131	2.86115e-128	0.245	0.571	hypothetical protein, conserved	N/A
0	34.6625	1.82688	LmjF.10.0070	-0.191578	1.24884e-34	2.49768e-31	0.256	0.5	ribosomal protein l35a, putative	structural constituent of ribosome
0	34.6625	1.82688	LmjF.18.0140	-0.191596	8.91936e-112	1.78387e-108	0.045	0.165	Domain of unknown function DUF21, putative	N/A
0	34.6625	1.82688	LmjF.28.1410	-0.191685	7.41739e-14	1.48348e-10	0.104	0.351	DNA polymerase kappa, putative	DNA-directed DNA polymerase activity;damaged DNA binding
0	34.6625	1.82688	LmjF.30.1420	-0.191974	2.98148e-165	5.96296e-162	0.045	0.143	ama1 protein, putative	N/A
0	34.6625	1.82688	LmjF.22.0790	-0.192808	4.29283e-24	8.58567e-21	0.076	0.241	translation initiation factor SUI1, putative	RNA binding;translation initiation factor activity
0	34.6625	1.82688	LmjF.35.2650	-0.192819	6.43554e-21	1.28711e-17	0.06	0.318	Present in the outer mitochondrial membrane proteome 8	N/A
0	34.6625	1.82688	LmjF.29.1170	-0.192986	1.23437e-181	2.46874e-178	0.31	0.667	hypothetical protein, conserved	calcium ion binding
0	34.6625	1.82688	LmjF.09.0880	-0.193332	8.81677e-136	1.76335e-132	0.181	0.509	histone h1-like protein	N/A
0	34.6625	1.82688	LmjF.23.0360	-0.194166	1.0252e-95	2.0504e-92	0.082	0.196	NADP-dependent alcohol dehydrogenase, putative	oxidoreductase activity;zinc ion binding
0	34.6625	1.82688	LmjF.31.2490	-0.194355	3.3607e-103	6.7214e-100	0.052	0.174	ferredoxin, 2fe-2s-like protein	2 iron, 2 sulfur cluster binding;electron transfer activity;iron-sulfur cluster binding
0	34.6625	1.82688	LmjF.35.3800	-0.194491	1.08997e-28	2.17994e-25	0.584	0.752	60S ribosomal protein L23, putative	structural constituent of ribosome
0	34.6625	1.82688	LmjF.30.0750	-0.194889	4.84397e-22	9.68795e-19	0.117	0.274	4-methyl-5(beta-hydroxyethyl)-thiazole monophosphate synthesis protein, putative	N/A
0	34.6625	1.82688	LmjF.31.0270	-0.194971	6.142e-244	1.2284e-240	0.035	0.111	2OG-Fe(II) oxygenase superfamily, putative	L-ascorbic acid binding;iron ion binding;oxidoreductase activity;oxidoreductase activity, acting on paired donors, with incorporation or reduction of molecular oxygen
0	34.6625	1.82688	LmjF.16.0690	-0.195791	7.01083e-62	1.40217e-58	0.072	0.212	eukaryotic translation initiation factor eIF2A, putative	translation initiation factor activity
0	34.6625	1.82688	LmjF.30.2250	-0.19625	3.32513e-140	6.65027e-137	0.111	0.439	zinc-finger protein, conserved	nucleic acid binding;zinc ion binding
0	34.6625	1.82688	LmjF.06.0190	-0.196634	3.12969e-41	6.25937e-38	0.109	0.387	hypothetical protein, conserved	N/A
0	34.6625	1.82688	LmjF.13.1210	-0.197345	1.11834e-07	0.000223669	0.832	0.893	nucleobase transporter	nucleoside transmembrane transporter activity
0	34.6625	1.82688	LmjF.05.1215	-0.19771	5.21791e-36	1.04358e-32	0.106	0.253	surface antigen-like protein	N/A
0	34.6625	1.82688	LmjF.31.3120	-0.198377	1.47943e-76	2.95886e-73	0.095	0.222	phosphatidylethanolaminen-methyltransferase-lik e protein	N/A
0	34.6625	1.82688	LmjF.17.0580	-0.199385	3.36262e-24	6.72523e-21	0.043	0.22	bis(5'-nucleosyl)-tetraphosphatase, symmetrical-like protein	hydrolase activity
0	34.6625	1.82688	LmjF.30.0220	-0.199412	4.56543e-240	9.13087e-237	0.027	0.108	hypothetical protein, conserved	N/A
0	34.6625	1.82688	LmjF.11.1200	-0.199479	2.32089e-99	4.64179e-96	0.069	0.19	Organic solute transporter Ostalpha, putative	N/A
0	34.6625	1.82688	LmjF.35.4125	-0.200384	1.08295e-94	2.16589e-91	0.132	0.443	hypothetical protein, conserved	N/A
0	34.6625	1.82688	LmjF.31.1370	-0.200536	2.63806e-149	5.27612e-146	0.045	0.149	hypothetical protein, conserved	protein binding
0	34.6625	1.82688	LmjF.23.0840	-0.20152	2.23083e-93	4.46165e-90	0.059	0.184	hypothetical protein, unknown function	N/A
0	34.6625	1.82688	LmjF.35.2770	-0.201719	8.39956e-207	1.67991e-203	0.196	0.556	hypothetical protein, conserved	protein binding
0	34.6625	1.82688	LmjF.12.1140	-0.202094	1.5718e-120	3.14359e-117	0.086	0.408	n-ethylmaleimide reductase-like protein	FMN binding;catalytic activity;oxidoreductase activity
0	34.6625	1.82688	LmjF.09.0870	-0.202479	2.38638e-38	4.77275e-35	0.091	0.366	hypothetical protein, conserved	N/A
0	34.6625	1.82688	LmjF.21.0880	-0.203222	2.54372e-74	5.08745e-71	0.055	0.191	ABC transporter, putative	ATP binding
0	34.6625	1.82688	LmjF.17.1370	-0.203469	1.51403e-44	3.02805e-41	0.052	0.209	NUC130/3NT domain/SDA1, putative	N/A
0	34.6625	1.82688	LmjF.06.1280	-0.203592	9.47553e-233	1.89511e-229	0.026	0.107	protoporphyrinogen oxidase-like protein	N/A
0	34.6625	1.82688	LmjF.29.2270	-0.204781	1.04206e-14	2.08412e-11	0.042	0.229	acyltransferase, putative	transferase activity, transferring acyl groups
0	34.6625	1.82688	LmjF.26.2570	-0.204818	1.31764e-52	2.63528e-49	0.506	0.744	Serine/threonine-protein kinase NEK15, putative	ATP binding;protein kinase activity
0	34.6625	1.82688	LmjF.31.0810	-0.206967	4.27125e-177	8.5425e-174	0.054	0.144	hypothetical protein, conserved	N/A
0	34.6625	1.82688	LmjF.31.2740	-0.207619	5.67963e-84	1.13593e-80	0.069	0.197	Endoplasmic Reticulum-Golgi Intermediate Compartment (ERGIC)/Endoplasmic reticulum vesicle transporter, putative	N/A
0	34.6625	1.82688	LmjF.29.1860	-0.209347	1.78117e-57	3.56234e-54	0.028	0.182	hypothetical protein, conserved	N/A
0	34.6625	1.82688	LmjF.18.1650	-0.211222	1.70949e-54	3.41897e-51	0.081	0.225	chaperone protein DnaJ, putative	protein binding
0	34.6625	1.82688	LmjF.29.2370	-0.212458	1.65263e-38	3.30527e-35	0.093	0.362	60S ribosomal protein L39, putative	structural constituent of ribosome
0	34.6625	1.82688	LmjF.29.1740	-0.212837	1.55544e-28	3.11089e-25	0.792	0.854	histone H2A, putative	DNA binding;protein heterodimerization activity
0	34.6625	1.82688	LmjF.07.1070	-0.213601	2.1502e-14	4.30039e-11	0.034	0.224	RNA-editing complex protein, putative	N/A
0	34.6625	1.82688	LmjF.30.2020	-0.213985	3.07249e-31	6.14497e-28	0.044	0.214	hypothetical protein, unknown function	N/A
0	34.6625	1.82688	LmjF.31.1395	-0.214084	7.54813e-32	1.50963e-28	0.129	0.277	zinc finger domain, LSD1 subclass, putative	N/A
0	34.6625	1.82688	LmjF.14.0870	-0.2161	2.65267e-48	5.30533e-45	0.086	0.229	hypothetical protein, conserved	N/A
0	34.6625	1.82688	LmjF.27.2330	-0.217619	5.08121e-64	1.01624e-60	0.096	0.225	GTP binding protein, putative	GTP binding
0	34.6625	1.82688	LmjF.30.2330	-0.217791	2.08173e-12	4.16346e-09	0.134	0.301	hypothetical protein, unknown function	N/A
0	34.6625	1.82688	LmjF.35.3925	-0.217804	6.14422e-263	1.22884e-259	0.126	0.505	hypothetical protein, conserved	N/A
0	34.6625	1.82688	LmjF.05.0970	-0.219538	9.21062e-103	1.84212e-99	0.053	0.176	3-mercaptopyruvate sulfurtransferase	N/A
0	34.6625	1.82688	LmjF.31.0610	-0.219541	3.47657e-140	6.95314e-137	0.042	0.154	hypothetical protein, conserved	selenocysteine insertion sequence binding
0	34.6625	1.82688	LmjF.15.0660	-0.219712	4.62106e-37	9.24213e-34	0.117	0.261	hypothetical protein, conserved	N/A
0	34.6625	1.82688	LmjF.31.0710	-0.219826	5.2335e-14	1.0467e-10	0.166	0.328	hypothetical protein, unknown function	N/A
0	34.6625	1.82688	LmjF.08.0840	-0.221072	9.66825e-37	1.93365e-33	0.133	0.404	amastin-like protein	N/A
0	34.6625	1.82688	LmjF.30.1610	-0.221896	3.15108e-101	6.30216e-98	0.076	0.191	ferric reductase transmembrane protein, putative	oxidoreductase activity
0	34.6625	1.82688	LmjF.23.0547	-0.223033	5.80658e-145	1.16132e-141	0.055	0.159	hypothetical protein, conserved	N/A
0	34.6625	1.82688	LmjF.05.0600	-0.223604	2.38987e-89	4.77974e-86	0.05	0.181	COG4 transport protein, putative	N/A
0	34.6625	1.82688	LmjF.34.4600	-0.224008	2.46658e-20	4.93316e-17	0.124	0.285	1,2-Dihydroxy-3-keto-5-methylthiopentene dioxygenase, putative	acireductone dioxygenase [iron(II)-requiring] activity
0	34.6625	1.82688	LmjF.06.0010	-0.22421	7.62798e-32	1.5256e-28	0.532	0.728	histone H4	DNA binding;protein heterodimerization activity
0	34.6625	1.82688	LmjF.31.3140	-0.22583	1.01892e-92	2.03783e-89	0.056	0.181	hypothetical protein, conserved	N/A
0	34.6625	1.82688	LmjF.26.0730	-0.226548	3.34596e-43	6.69192e-40	0.098	0.245	hypothetical protein, conserved	N/A
0	34.6625	1.82688	LmjF.26.2680	-0.227041	8.4629e-18	1.69258e-14	0.159	0.402	hypothetical protein, unknown function	N/A
0	34.6625	1.82688	LmjF.22.0480	-0.22774	1.97493e-92	3.94985e-89	0.041	0.175	Dynamin family, putative	N/A
0	34.6625	1.82688	LmjF.14.0230	-0.227997	1.99193e-116	3.98387e-113	0.048	0.166	hypothetical protein, conserved	N/A
0	34.6625	1.82688	LmjF.32.0760	-0.23067	1.54238e-13	3.08476e-10	0.035	0.225	cyclin 9, putative	cyclin-dependent protein serine/threonine kinase regulator activity
0	34.6625	1.82688	LmjF.29.0350	-0.231841	1.55977e-27	3.11954e-24	0.171	0.427	hypothetical protein, conserved	N/A
0	34.6625	1.82688	LmjF.23.1050	-0.233064	3.31201e-25	6.62402e-22	0.181	0.429	small hydrophilic endoplasmic reticulum-associated protein (sherp)	N/A
0	34.6625	1.82688	LmjF.28.1690	-0.233445	2.39833e-292	4.79665e-289	0.157	0.544	sulfate transporter-like protein	secondary active sulfate transmembrane transporter activity;sulfate transmembrane transporter activity
0	34.6625	1.82688	LmjF.36.4780	-0.233667	1.03785e-21	2.0757e-18	0.139	0.3	paraflagellar rod component, putative	N/A
0	34.6625	1.82688	LmjF.16.0920	-0.234324	2.48678e-196	4.97356e-193	0.04	0.129	flagellar calcium-binding protein, putative	N/A
0	34.6625	1.82688	LmjF.07.0100	-0.23491	2.74826e-134	5.49653e-131	0.063	0.17	metallo-peptidase, Clan ME, Family M16C	metal ion binding
0	34.6625	1.82688	LmjF.20.1410	-0.235421	7.29243e-08	0.000145849	0.052	0.249	hypothetical protein, conserved	N/A
0	34.6625	1.82688	LmjF.07.1000	-0.235768	3.7077e-132	7.41541e-129	0.067	0.173	RNA binding protein-like protein	N/A
0	34.6625	1.82688	LmjF.04.1000	-0.238432	3.67665e-123	7.3533e-120	0.131	0.453	Voltage-gated Chloride channel Like 1, putative	voltage-gated chloride channel activity
0	34.6625	1.82688	LmjF.31.0140	-0.238868	1.39906e-06	0.00279812	0.093	0.281	ubiquitin carboxyl-terminal hydrolase, putative	protein binding;thiol-dependent ubiquitin-specific protease activity
0	34.6625	1.82688	LmjF.24.1120	-0.239601	3.02262e-08	6.04523e-05	0.075	0.269	hypothetical protein, conserved	N/A
0	34.6625	1.82688	LmjF.17.0340	-0.239848	1.62188e-16	3.24375e-13	0.053	0.233	hypothetical protein, conserved	N/A
0	34.6625	1.82688	LmjF.20.1620	-0.240899	6.92941e-233	1.38588e-229	0.032	0.111	CHORD, putative	N/A
0	34.6625	1.82688	LmjF.36.6140	-0.242867	1.51709e-99	3.03419e-96	0.048	0.175	hypothetical protein, conserved	N/A
0	34.6625	1.82688	LmjF.31.1700	-0.244547	5.17312e-137	1.03462e-133	0.048	0.158	hypothetical protein, conserved	protein binding
0	34.6625	1.82688	LmjF.26.0350	-0.24684	5.15562e-107	1.03112e-103	0.044	0.168	Vps52 / Sac2 family, putative	N/A
0	34.6625	1.82688	LmjF.06.0050	-0.247341	3.06947e-163	6.13895e-160	0.309	0.649	pumilio/PUF RNA binding protein 5, putative	RNA binding
0	34.6625	1.82688	LmjF.17.1380	-0.251926	1.46522e-18	2.93045e-15	0.056	0.239	hypothetical protein, conserved	protein binding
0	34.6625	1.82688	LmjF.11.0810	-0.253257	0	0	0.153	0.577	hypothetical protein, conserved	calcium ion binding
0	34.6625	1.82688	LmjF.17.0500	-0.254698	2.80175e-75	5.6035e-72	0.049	0.356	hypothetical protein	N/A
0	34.6625	1.82688	LmjF.36.1970	-0.255347	2.76339e-248	5.52677e-245	0.023	0.102	2OG-Fe(II) oxygenase superfamily, putative	oxidoreductase activity
0	34.6625	1.82688	LmjF.10.0483	-0.259437	1.32247e-33	2.64495e-30	0.063	0.338	hypothetical protein, unknown function	N/A
0	34.6625	1.82688	LmjF.02.0550	-0.262707	1.80469e-123	3.60938e-120	0.396	0.716	hypothetical protein, unknown function	N/A
0	34.6625	1.82688	LmjF.31.0455	-0.266826	1.51769e-24	3.03537e-21	0.901	0.943	tuzin	N/A
0	34.6625	1.82688	LmjF.04.0580	-0.267462	1.05691e-76	2.11382e-73	0.051	0.184	spermidine synthase	catalytic activity
0	34.6625	1.82688	LmjF.35.0570	-0.268188	1.87164e-97	3.74328e-94	0.142	0.454	hypothetical protein, conserved	protein binding
0	34.6625	1.82688	LmjF.15.0780	-0.270248	6.51192e-120	1.30238e-116	0.053	0.17	hypothetical protein, conserved	N/A
0	34.6625	1.82688	LmjF.32.1680	-0.272944	1.41864e-05	0.0283727	0.165	0.397	Paraflagellar Rod Proteome Component 9, putative	N/A
0	34.6625	1.82688	LmjF.31.1440	-0.274985	1.01151e-24	2.02301e-21	0.277	0.516	hypothetical protein, unknown function (pseudogene)	N/A
0	34.6625	1.82688	LmjF.07.0310	-0.278271	0	0	0.186	0.602	paraflagellar rod protein, putative	calmodulin binding
0	34.6625	1.82688	LmjF.36.4140	-0.285284	2.3033e-134	4.60661e-131	0.04	0.151	Amastin surface glycoprotein, putative	N/A
0	34.6625	1.82688	LmjF.07.0920	-0.28695	4.60436e-31	9.20872e-28	0.106	0.263	Protein of unknown function (DUF3608), putative	GTPase activator activity
0	34.6625	1.82688	LmjF.32.2550	-0.287394	2.70736e-26	5.41472e-23	0.08	0.25	adenosine monophosphate deaminase-like protein	AMP deaminase activity;deaminase activity
0	34.6625	1.82688	LmjF.22.0520	-0.29119	2.07963e-108	4.15927e-105	0.049	0.172	Rab-GTPase-TBC domain containing protein, putative	N/A
0	34.6625	1.82688	LmjF.09.0030	-0.293401	7.19906e-152	1.43981e-148	0.024	0.135	Peroxisomal biogenesis factor 11 (PEX11), putative	N/A
0	34.6625	1.82688	LmjF.31.2890	-0.294319	2.5085e-157	5.017e-154	0.037	0.144	Region in Clathrin and VPS, putative	protein binding
0	34.6625	1.82688	LmjF.12.0290	-0.294343	4.72593e-32	9.45186e-29	0.05	0.217	hypothetical protein, unknown function	N/A
0	34.6625	1.82688	LmjF.35.0500	-0.298384	8.55358e-69	1.71072e-65	0.251	0.53	proteophosphoglycan ppg3, putative	protein binding;transmembrane signaling receptor activity
0	34.6625	1.82688	LmjF.36.5340	-0.302748	3.86443e-86	7.72887e-83	0.128	0.437	hypothetical protein, conserved	N/A
0	34.6625	1.82688	LmjF.27.0680	-0.307554	1.40199e-24	2.80399e-21	0.531	0.687	amino acid permease, putative	N/A
0	34.6625	1.82688	LmjF.06.0830	-0.312045	1.84309e-17	3.68619e-14	0.246	0.477	lipin, putative	N/A
0	34.6625	1.82688	LmjF.29.1750	-0.328354	1.88303e-172	3.76607e-169	0.311	0.662	paraflagellar rod protein 1D, putative	calmodulin binding
0	34.6625	1.82688	LmjF.23.0990	-0.333582	1.34065e-113	2.6813e-110	0.251	0.571	hypothetical protein, conserved	N/A
0	34.6625	1.82688	LmjF.31.3030	-0.341535	4.24792e-84	8.49583e-81	0.055	0.186	hypothetical protein, unknown function	N/A
0	34.6625	1.82688	LmjF.33.0610	-0.344636	5.48861e-11	1.09772e-07	0.127	0.31	paraflagellar rod component, putative	N/A
0	34.6625	1.82688	LmjF.22.0050	-0.348318	1.49408e-174	2.98816e-171	0.019	0.125	hypothetical protein, conserved	N/A
0	34.6625	1.82688	LmjF.29.2480	-0.356185	2.13425e-57	4.2685e-54	0.132	0.424	hypothetical protein, conserved	N/A
0	34.6625	1.82688	LmjF.22.1670	-0.365127	1.11755e-230	2.23509e-227	0.013	0.1	hypothetical protein, conserved	N/A
0	34.6625	1.82688	LmjF.12.0890	-0.366562	3.62265e-117	7.24531e-114	0.037	0.157	promastigote surface antigen 38S	N/A
0	34.6625	1.82688	LmjF.24.1560	-0.415313	1.33303e-159	2.66605e-156	0.434	0.764	hypothetical protein, conserved	N/A
0	34.6625	1.82688	LmjF.16.1425	-0.433766	1.98566e-73	3.97132e-70	0.335	0.625	Paraflagellar rod protein 2-3	calmodulin binding
0	34.6625	1.82688	LmjF.30.2850	-0.463696	1.74425e-122	3.4885e-119	0.182	0.505	hypothetical protein, conserved	N/A
0	34.6625	1.82688	LmjF.19.0520	-0.479014	3.96206e-09	7.92412e-06	0.187	0.432	hypothetical protein, conserved	N/A
0	34.6625	1.82688	LmjF.36.4230	-0.496664	3.1632e-193	6.3264e-190	0.159	0.53	paraflagellar rod component, putative	protein binding
0	34.6625	1.82688	LmjF.18.1640	-0.527324	8.11577e-46	1.62315e-42	0.24	0.522	hypothetical protein, conserved	N/A
0	34.6625	1.82688	LmjF.10.0185	-0.66262	0	0	0.261	0.686	hypothetical protein	N/A
0	34.6625	1.82688	LmjF.29.1770	-0.743103	0	0	0.354	0.771	paraflagellar rod protein 1D, putative	calmodulin binding
1	34.1921	0.931829	LmjF.34.2500	0.432546	3.89823e-221	7.79646e-218	0.217	0.61	protein phosphatase 2C-like protein	cation binding;phosphatase activity;protein serine/threonine phosphatase activity
1	34.1921	0.931829	LmjF.02.0550	0.387542	7.29882e-29	1.45976e-25	0.408	0.711	hypothetical protein, unknown function	N/A
1	34.1921	0.931829	LmjF.10.0185	0.360996	3.68666e-71	7.37331e-68	0.338	0.661	hypothetical protein	N/A
1	34.1921	0.931829	LmjF.19.0520	0.354437	4.23105e-14	8.46209e-11	0.249	0.413	hypothetical protein, conserved	N/A
1	34.1921	0.931829	LmjF.24.1560	0.352809	4.21481e-09	8.42963e-06	0.481	0.748	hypothetical protein, conserved	N/A
1	34.1921	0.931829	LmjF.10.0370	0.350609	1.28514e-23	2.57028e-20	0.158	0.423	folate/biopterin transporter, putative	N/A
1	34.1921	0.931829	LmjF.10.0480	0.34501	5.33754e-230	1.06751e-226	0.224	0.631	GP63, leishmanolysin	metalloendopeptidase activity
1	34.1921	0.931829	LmjF.36.4230	0.315662	9.8302e-76	1.96604e-72	0.202	0.516	paraflagellar rod component, putative	protein binding
1	34.1921	0.931829	LmjF.33.3010	0.309387	2.09985e-246	4.19971e-243	0.161	0.552	hypothetical protein, conserved	N/A
1	34.1921	0.931829	LmjF.01.0010	0.291923	0	0	0.131	0.552	Protein of unknown function (DUF2946), putative	N/A
1	34.1921	0.931829	LmjF.33.1460	0.279795	4.57044e-236	9.14089e-233	0.21	0.612	RNA recognition motif. (a.k.a. RRM, RBD, or RNP domain), putative	nucleic acid binding
1	34.1921	0.931829	LmjF.14.0720	0.273301	1.79764e-18	3.59528e-15	0.052	0.313	fatty acid elongase, putative	N/A
1	34.1921	0.931829	LmjF.09.0210	0.268983	1.03928e-117	2.07856e-114	0.322	0.69	Domain of unknown function (DUF4586), putative	N/A
1	34.1921	0.931829	LmjF.26.1450	0.249502	3.17966e-235	6.35932e-232	0.18	0.576	hypothetical protein, conserved	N/A
1	34.1921	0.931829	LmjF.17.0190	0.247136	0	0	0.082	0.484	receptor-type adenylate cyclase, putative	N/A
1	34.1921	0.931829	LmjF.09.1310	0.24422	0	0	0.11	0.542	PPPDE putative peptidase domain containing protein, putative	N/A
1	34.1921	0.931829	LmjF.36.3800	0.229495	1.15489e-53	2.30977e-50	0.287	0.605	aminomethyltransferase, mitochondrial, putative	aminomethyltransferase activity;protein binding
1	34.1921	0.931829	LmjF.23.0720	0.228107	5.36318e-56	1.07264e-52	0.4	0.732	RNA recognition motif. (a.k.a. RRM, RBD, or RNP domain), putative	nucleic acid binding
1	34.1921	0.931829	LmjF.26.0005	0.227155	2.6486e-147	5.29721e-144	0.125	0.476	Lsm7p protein, putative	N/A
1	34.1921	0.931829	LmjF.36.4150	0.227133	3.6534e-284	7.30679e-281	0.184	0.597	hypothetical protein, conserved	N/A
1	34.1921	0.931829	LmjF.36.6290	0.223208	3.58142e-136	7.16284e-133	0.262	0.631	glucose transporter 2	transmembrane transporter activity
1	34.1921	0.931829	LmjF.23.0010	0.218874	7.1702e-250	1.43404e-246	0.216	0.625	hypothetical protein, conserved	N/A
1	34.1921	0.931829	LmjF.25.1860	0.21494	1.55152e-263	3.10305e-260	0.132	0.527	TLP18.3, Psb32 and MOLO-1 founding proteins of phosphatase, putative	N/A
1	34.1921	0.931829	LmjF.08.0680	0.213511	3.3248e-06	0.0066496	0.512	0.834	amastin-like protein	N/A
1	34.1921	0.931829	LmjF.29.1750	0.212695	1.14993e-86	2.29985e-83	0.317	0.657	paraflagellar rod protein 1D, putative	calmodulin binding
1	34.1921	0.931829	LmjF.24.2320	0.208635	2.01793e-203	4.03585e-200	0.256	0.665	mitogen-activated protein kinase kinase 4, putative	ATP binding;protein kinase activity
1	34.1921	0.931829	LmjF.10.0250	0.208593	8.05313e-89	1.61063e-85	0.148	0.473	pterin 4 alpha carbinolamine dehydratase, putative	4-alpha-hydroxytetrahydrobiopterin dehydratase activity
1	34.1921	0.931829	LmjF.27.2020	0.199973	2.20084e-203	4.40168e-200	0.238	0.641	D-lactate dehydrogenase-like protein	FAD binding;catalytic activity;flavin adenine dinucleotide binding;oxidoreductase activity
1	34.1921	0.931829	LmjF.04.1210	0.199787	0	0	0.075	0.506	casein kinase I, putative	ATP binding;protein kinase activity
1	34.1921	0.931829	LmjF.34.1310	0.196422	4.3632e-155	8.7264e-152	0.144	0.501	hypothetical protein, conserved	N/A
1	34.1921	0.931829	LmjF.32.0350	0.196267	5.30376e-273	1.06075e-269	0.155	0.565	hypothetical protein, conserved	N/A
1	34.1921	0.931829	LmjF.21.0950	0.195593	5.60633e-59	1.12127e-55	0.097	0.393	Programmed cell death protein 2, C-terminal putative domain containing protein, putative	N/A
1	34.1921	0.931829	LmjF.15.0630	0.193249	1.09641e-101	2.19282e-98	0.133	0.461	hypothetical protein, unknown function	N/A
1	34.1921	0.931829	LmjF.22.0060	0.192464	3.14421e-29	6.28842e-26	0.109	0.383	transcription factor-like protein	DNA-binding transcription factor activity;nucleic acid binding;zinc ion binding
1	34.1921	0.931829	LmjF.25.1120	0.188613	4.58162e-142	9.16324e-139	0.283	0.656	aldehyde dehydrogenase, mitochondrial precursor	oxidoreductase activity;oxidoreductase activity, acting on the aldehyde or oxo group of donors, NAD or NADP as acceptor
1	34.1921	0.931829	LmjF.02.0310	0.188243	0	0	0.14	0.567	Soluble NSF attachment protein, SNAP, putative	protein binding
1	34.1921	0.931829	LmjF.29.1170	0.187423	3.8065e-165	7.61299e-162	0.281	0.672	hypothetical protein, conserved	calcium ion binding
1	34.1921	0.931829	LmjF.26.1980	0.183399	1.92796e-271	3.85593e-268	0.161	0.565	hypothetical protein, conserved	N/A
1	34.1921	0.931829	LmjF.35.0500	0.183116	8.73744e-56	1.74749e-52	0.232	0.533	proteophosphoglycan ppg3, putative	protein binding;transmembrane signaling receptor activity
1	34.1921	0.931829	LmjF.23.1650	0.1824	2.86858e-171	5.73716e-168	0.2	0.572	Putative tRNA binding domain containing protein, putative	tRNA binding
1	34.1921	0.931829	LmjF.35.4190	0.182173	7.59931e-276	1.51986e-272	0.166	0.578	hypothetical protein, conserved	N/A
1	34.1921	0.931829	LmjF.36.5830	0.180509	9.49978e-62	1.89996e-58	0.11	0.409	Nitroreductase family, putative	oxidoreductase activity;oxidoreductase activity, acting on NAD(P)H, nitrogenous group as acceptor
1	34.1921	0.931829	LmjF.29.1360	0.18009	0	0	0.075	0.518	RNA binding protein, putative	nucleic acid binding
1	34.1921	0.931829	LmjF.36.4250	0.175318	0	0	0.095	0.514	CMGC/DYRK protein kinase, putative	ATP binding;protein kinase activity
1	34.1921	0.931829	LmjF.35.0980	0.174468	5.64213e-233	1.12843e-229	0.161	0.552	aldose 1-epimerase-like protein	carbohydrate binding;catalytic activity;isomerase activity
1	34.1921	0.931829	LmjF.16.0110	0.174066	4.3527e-150	8.7054e-147	0.201	0.563	Phosphotransferase enzyme family, putative	N/A
1	34.1921	0.931829	LmjF.29.2870	0.172814	7.85295e-43	1.57059e-39	0.105	0.395	hypothetical protein, conserved	N/A
1	34.1921	0.931829	LmjF.26.1590	0.171226	1.59316e-130	3.18632e-127	0.2	0.555	hypothetical protein, unknown function	protein binding
1	34.1921	0.931829	LmjF.17.0030	0.169303	1.40828e-200	2.81656e-197	0.135	0.512	Ring finger domain containing protein, putative	N/A
1	34.1921	0.931829	LmjF.26.2250	0.168321	7.75167e-218	1.55033e-214	0.153	0.538	hypothetical protein, conserved	N/A
1	34.1921	0.931829	LmjF.12.1260	0.167763	2.54203e-104	5.08407e-101	0.164	0.5	hypothetical protein, conserved	N/A
1	34.1921	0.931829	LmjF.29.0280	0.167107	4.0535e-104	8.107e-101	0.344	0.709	D-lactate dehydrogenase-like protein	FAD binding;catalytic activity;flavin adenine dinucleotide binding;oxidoreductase activity
1	34.1921	0.931829	LmjF.27.0210	0.165801	2.49378e-137	4.98756e-134	0.18	0.535	Vacuolar iron transporter 1, putative	manganese ion transmembrane transporter activity
1	34.1921	0.931829	LmjF.28.1930	0.16391	2.4738e-306	4.94759e-303	0.06	0.456	Zinc transporter 3, putative	metal ion transmembrane transporter activity
1	34.1921	0.931829	LmjF.24.1880	0.162991	0	0	0.15	0.578	cyclin 11, putative	protein kinase binding
1	34.1921	0.931829	LmjF.05.1215	0.161761	3.68688e-36	7.37375e-33	0.098	0.254	surface antigen-like protein	N/A
1	34.1921	0.931829	LmjF.11.1350	0.161448	5.17609e-06	0.0103522	0.076	0.323	hypothetical protein, conserved	N/A
1	34.1921	0.931829	LmjF.19.0980	0.16093	8.98296e-157	1.79659e-153	0.228	0.605	FYVE zinc finger, putative	metal ion binding
1	34.1921	0.931829	LmjF.35.3925	0.159234	4.05726e-246	8.11452e-243	0.119	0.504	hypothetical protein, conserved	N/A
1	34.1921	0.931829	LmjF.23.1690	0.157166	1.37901e-267	2.75802e-264	0.145	0.547	hypothetical protein	N/A
1	34.1921	0.931829	LmjF.16.1310	0.153713	7.57315e-164	1.51463e-160	0.258	0.651	cytochrome c, putative	electron transfer activity;heme binding
1	34.1921	0.931829	LmjF.30.3690	0.15308	0	0	0.098	0.524	Protein of unknown function (DUF3808), putative	protein binding
1	34.1921	0.931829	LmjF.22.0275	0.151606	0	0	0.119	0.528	hypothetical protein, conserved	N/A
1	34.1921	0.931829	LmjF.34.2740	0.150825	8.44328e-218	1.68866e-214	0.117	0.496	hypothetical protein, unknown function	N/A
1	34.1921	0.931829	LmjF.35.1040	0.149581	4.68452e-145	9.36904e-142	0.249	0.616	zinc finger CCCH domain containing protein 11	metal ion binding
1	34.1921	0.931829	LmjF.16.1145	0.149352	3.10692e-111	6.21383e-108	0.081	0.411	hypothetical protein	N/A
1	34.1921	0.931829	LmjF.02.0320	0.147862	3.60237e-40	7.20473e-37	0.082	0.369	ribosomal RNA processing protein 41B, putative	N/A
1	34.1921	0.931829	LmjF.24.2020	0.147502	1.22332e-137	2.44664e-134	0.086	0.432	tubulin folding cofactor D, putative	GTPase activator activity;beta-tubulin binding
1	34.1921	0.931829	LmjF.34.0400	0.146943	8.50784e-192	1.70157e-188	0.093	0.456	hypothetical protein, conserved	rRNA binding;structural constituent of ribosome
1	34.1921	0.931829	LmjF.11.1040	0.14682	1.08163e-23	2.16326e-20	0.118	0.286	hypothetical protein, conserved	N/A
1	34.1921	0.931829	LmjF.04.0230	0.145544	9.49282e-102	1.89856e-98	0.093	0.415	hypothetical protein, conserved	N/A
1	34.1921	0.931829	LmjF.24.1540	0.145081	7.14396e-242	1.42879e-238	0.123	0.511	adaptor complex AP-3 small subunit, putative	N/A
1	34.1921	0.931829	LmjF.35.0460	0.143044	0	0	0.105	0.544	Generative cell specific 1 protein, putative	N/A
1	34.1921	0.931829	LmjF.06.1210	0.142566	1.16286e-171	2.32572e-168	0.128	0.488	hypothetical protein, unknown function	N/A
1	34.1921	0.931829	LmjF.35.4510	0.141873	2.23269e-289	4.46538e-286	0.148	0.556	MICOS complex subunit MIC60, putative	N/A
1	34.1921	0.931829	LmjF.23.0355	0.139695	2.60455e-254	5.20909e-251	0.093	0.477	hypothetical protein	N/A
1	34.1921	0.931829	LmjF.07.0310	0.138856	0	0	0.177	0.602	paraflagellar rod protein, putative	calmodulin binding
1	34.1921	0.931829	LmjF.34.0550	0.137994	1.99136e-214	3.98271e-211	0.258	0.671	Cysteine leucine rich protein	N/A
1	34.1921	0.931829	LmjF.35.3510	0.137987	1.14522e-28	2.29043e-25	0.158	0.432	structural maintenance of chromosome (SMC) family protein, putative	ATP binding;protein binding
1	34.1921	0.931829	LmjF.32.2900	0.137942	4.01163e-211	8.02327e-208	0.116	0.49	outer dynein arm docking complex, putative	N/A
1	34.1921	0.931829	LmjF.30.3140	0.137507	0	0	0.18	0.614	hypothetical protein, conserved	N/A
1	34.1921	0.931829	LmjF.29.0865	0.137328	7.08126e-76	1.41625e-72	0.081	0.39	RNA recognition motif. (a.k.a. RRM, RBD, or RNP domain), putative	nucleic acid binding
1	34.1921	0.931829	LmjF.26.0160	0.136699	8.97619e-170	1.79524e-166	0.05	0.398	nuclear lim interactor-interacting factor-like protein	phosphatase activity
1	34.1921	0.931829	LmjF.36.1910	0.13634	9.83771e-54	1.96754e-50	0.11	0.411	T-lymphocyte triggering factor, putative	microtubule binding
1	34.1921	0.931829	LmjF.26.1310	0.135606	1.07931e-284	2.15862e-281	0.106	0.506	hypothetical protein, conserved	N/A
1	34.1921	0.931829	LmjF.11.0810	0.134651	0	0	0.145	0.576	hypothetical protein, conserved	calcium ion binding
1	34.1921	0.931829	LmjF.33.0080	0.133434	9.34931e-237	1.86986e-233	0.071	0.448	hypothetical protein, conserved	N/A
1	34.1921	0.931829	LmjF.19.0180	0.133285	1.96197e-248	3.92395e-245	0.175	0.578	mitogen-activated protein kinase 9, putative	ATP binding;protein kinase activity
1	34.1921	0.931829	LmjF.09.0080	0.131924	1.43526e-260	2.87053e-257	0.08	0.465	RNA-binding protein 5-like protein	nucleic acid binding
1	34.1921	0.931829	LmjF.26.1015	0.13031	1.86508e-203	3.73017e-200	0.098	0.466	hypothetical protein	N/A
1	34.1921	0.931829	LmjF.36.1330	0.130007	0	0	0.132	0.561	heat shock protein, putative	N/A
1	34.1921	0.931829	LmjF.36.0740	0.129359	0	0	0.149	0.578	zinc finger protein family member, putative	metal ion binding
1	34.1921	0.931829	LmjF.20.1330	0.128725	2.94169e-208	5.88338e-205	0.054	0.418	protein kinase, putative	ATP binding;protein kinase activity
1	34.1921	0.931829	LmjF.33.0610	0.128239	1.13121e-25	2.26241e-22	0.138	0.306	paraflagellar rod component, putative	N/A
1	34.1921	0.931829	LmjF.31.0710	0.125989	2.00738e-21	4.01476e-18	0.16	0.328	hypothetical protein, unknown function	N/A
1	34.1921	0.931829	LmjF.31.0840	0.124364	3.23288e-284	6.46576e-281	0.068	0.455	lipase precursor-like protein	N/A
1	34.1921	0.931829	LmjF.29.1900	0.124237	5.07915e-140	1.01583e-136	0.079	0.425	hypothetical protein, conserved	N/A
1	34.1921	0.931829	LmjF.02.0530	0.123394	0	0	0.18	0.608	hypothetical protein, conserved	N/A
1	34.1921	0.931829	LmjF.27.1590	0.122499	6.27791e-07	0.00125558	0.071	0.319	diacylglycerol acyltransferase, putative	transferase activity, transferring acyl groups other than amino-acyl groups
1	34.1921	0.931829	LmjF.07.0210	0.122378	0	0	0.097	0.531	hypothetical protein, conserved	N/A
1	34.1921	0.931829	LmjF.29.1290	0.122278	1.12718e-254	2.25435e-251	0.125	0.517	hypothetical protein, conserved	N/A
1	34.1921	0.931829	LmjF.27.0020	0.121747	1.35613e-253	2.71227e-250	0.116	0.506	Meckelin (Transmembrane protein 67), putative	N/A
1	34.1921	0.931829	LmjF.24.1315	0.121445	5.70627e-146	1.14125e-142	0.076	0.417	cyclophilin 8, putative	peptidyl-prolyl cis-trans isomerase activity
1	34.1921	0.931829	LmjF.27.2305	0.121423	4.85257e-09	9.70513e-06	0.079	0.329	MORN repeat, putative	N/A
1	34.1921	0.931829	LmjF.35.4330	0.120816	3.63047e-07	0.000726095	0.083	0.286	pre-RNA processing PIH1/Nop17, putative	N/A
1	34.1921	0.931829	LmjF.31.0200	0.120273	2.89563e-11	5.79126e-08	0.099	0.292	WD repeat protein	protein binding
1	34.1921	0.931829	LmjF.25.0390	0.120222	0	0	0.152	0.587	hypothetical protein, conserved	N/A
1	34.1921	0.931829	LmjF.29.1120	0.119628	8.81018e-276	1.76204e-272	0.101	0.5	PSP1 C-terminal conserved region, putative	N/A
1	34.1921	0.931829	LmjF.09.0090	0.119253	0	0	0.041	0.459	RNA-binding protein 5-like protein	nucleic acid binding
1	34.1921	0.931829	LmjF.28.2650	0.118302	9.37103e-30	1.87421e-26	0.091	0.256	membrane-bound acid phosphatase, putative	N/A
1	34.1921	0.931829	LmjF.36.3230	0.117762	3.90742e-34	7.81483e-31	0.102	0.383	oxidoreductase, putative	flavin adenine dinucleotide binding;oxidoreductase activity, acting on CH-OH group of donors
1	34.1921	0.931829	LmjF.25.1450	0.116898	8.28589e-14	1.65718e-10	0.049	0.243	Peptide chain release factor 1, mitochondrial, putative	translation release factor activity
1	34.1921	0.931829	LmjF.33.2840	0.116279	2.28854e-82	4.57708e-79	0.087	0.402	lipid-like atypical dual specificity phosphatase, putative	phosphoprotein phosphatase activity;protein tyrosine phosphatase activity
1	34.1921	0.931829	LmjF.24.1180	0.11567	4.09151e-78	8.18303e-75	0.063	0.375	Surfeit locus protein 6, putative	N/A
1	34.1921	0.931829	LmjF.07.0070	0.115404	1.37786e-253	2.75573e-250	0.111	0.501	hypothetical protein, conserved	N/A
1	34.1921	0.931829	LmjF.33.2930	0.115373	2.16432e-173	4.32865e-170	0.082	0.438	Present in the outer mitochondrial membrane proteome 22	N/A
1	34.1921	0.931829	LmjF.33.1820	0.115094	4.94857e-260	9.89714e-257	0.09	0.478	hypothetical protein, conserved	N/A
1	34.1921	0.931829	LmjF.20.1600	0.113668	1.96181e-102	3.92361e-99	0.047	0.177	hypothetical protein, conserved	protein binding
1	34.1921	0.931829	LmjF.11.1300	0.113538	2.19949e-152	4.39899e-149	0.093	0.44	hypothetical protein, conserved	N/A
1	34.1921	0.931829	LmjF.19.0340	0.113481	2.43749e-233	4.87498e-230	0.191	0.594	hypothetical protein, conserved	N/A
1	34.1921	0.931829	LmjF.29.1590	0.111335	0	0	0.168	0.598	hypothetical protein, unknown function	N/A
1	34.1921	0.931829	LmjF.36.0260	0.110193	2.83592e-198	5.67184e-195	0.273	0.678	xylulokinase, putative	phosphotransferase activity, alcohol group as acceptor;xylulokinase activity
1	34.1921	0.931829	LmjF.35.4970	0.109119	0	0	0.108	0.554	hypothetical protein, conserved	N/A
1	34.1921	0.931829	LmjF.10.0945	0.108238	1.8111e-25	3.62219e-22	0.125	0.296	Archaic translocase of outer membrane 12 kDa subunit, putative	N/A
1	34.1921	0.931829	LmjF.31.0530	0.108212	3.63034e-165	7.26068e-162	0.158	0.525	hypothetical protein, unknown function	N/A
1	34.1921	0.931829	LmjF.28.2210	0.107013	4.82727e-91	9.65453e-88	0.147	0.477	glycoprotein 96-92, putative	N/A
1	34.1921	0.931829	LmjF.28.1640	0.106578	2.33655e-94	4.67309e-91	0.097	0.422	hypothetical protein, conserved	N/A
1	34.1921	0.931829	LmjF.36.5480	0.106228	7.39248e-281	1.4785e-277	0.139	0.542	hypothetical protein, conserved	N/A
1	34.1921	0.931829	LmjF.24.1030	0.106106	2.90654e-249	5.81308e-246	0.132	0.531	dynein light chain, putative	protein binding
1	34.1921	0.931829	LmjF.35.4750	0.105713	2.38786e-140	4.77572e-137	0.135	0.482	glyceraldehyde-3-phosphate dehydrogenase-like protein	NAD binding;oxidoreductase activity, acting on the aldehyde or oxo group of donors, NAD or NADP as acceptor
1	34.1921	0.931829	LmjF.34.0960	0.105575	2.48837e-290	4.97673e-287	0.199	0.628	amastin-like surface protein, putative	N/A
1	34.1921	0.931829	LmjF.29.1970	0.103982	1.47549e-121	2.95097e-118	0.084	0.42	hypothetical protein, unknown function	N/A
1	34.1921	0.931829	LmjF.35.2770	0.103629	2.79678e-223	5.59356e-220	0.17	0.56	hypothetical protein, conserved	protein binding
1	34.1921	0.931829	LmjF.29.1400	0.102013	6.21649e-110	1.2433e-106	0.065	0.393	LYAR-type C2HC zinc finger, putative	DNA binding
1	34.1921	0.931829	LmjF.34.1400	0.100581	0	0	0.077	0.477	d-isomer specific 2-hydroxyacid dehydrogenase- protein	NAD binding
1	34.1921	0.931829	LmjF.25.2400	-0.10087	1.40556e-26	2.81112e-23	0.034	0.218	Arv1-like family, putative	N/A
1	34.1921	0.931829	LmjF.30.0090	-0.100918	6.53889e-196	1.30778e-192	0.21	0.604	hypothetical protein, conserved	N/A
1	34.1921	0.931829	LmjF.31.1260	-0.101048	1.17792e-40	2.35584e-37	0.028	0.2	Microtubule-binding stalk of dynein motor, putative	ATP-dependent microtubule motor activity, minus-end-directed
1	34.1921	0.931829	LmjF.34.2570	-0.101071	2.947e-228	5.89401e-225	0.11	0.502	Flagellum attachment zone protein 8	N/A
1	34.1921	0.931829	LmjF.31.2580	-0.101285	1.57529e-16	3.15058e-13	0.156	0.429	ubiquinol-cytochrome-c reductase-like protein	ubiquinol-cytochrome-c reductase activity
1	34.1921	0.931829	LmjF.36.6990	-0.102182	2.43276e-141	4.86552e-138	0.029	0.374	acetyltransferase, putative	histone acetyltransferase activity
1	34.1921	0.931829	LmjF.31.2461	-0.102292	2.1208e-133	4.2416e-130	0.036	0.159	hypothetical protein, conserved	N/A
1	34.1921	0.931829	LmjF.27.1850	-0.102351	1.08218e-122	2.16437e-119	0.047	0.172	paraflagellar rod protein 5, putative	calmodulin binding;protein binding
1	34.1921	0.931829	LmjF.29.0670	-0.102873	1.39164e-156	2.78328e-153	0.023	0.139	hypothetical protein, conserved	N/A
1	34.1921	0.931829	LmjF.08.0120	-0.102881	3.20823e-50	6.41646e-47	0.055	0.216	hypothetical protein, conserved	N/A
1	34.1921	0.931829	LmjF.33.1590	-0.103039	1.40591e-33	2.81182e-30	0.091	0.379	3-ketoacyl-CoA reductase, putative	N/A
1	34.1921	0.931829	LmjF.27.1980	-0.103262	1.41017e-99	2.82034e-96	0.052	0.186	FtsJ cell division protein, putative	methyltransferase activity;rRNA methyltransferase activity
1	34.1921	0.931829	LmjF.24.1290	-0.103321	4.74553e-262	9.49106e-259	0.079	0.468	WASH complex subunit 7, N-terminal/WASH complex subunit 7/WASH complex subunit 7, C-terminal, putative	N/A
1	34.1921	0.931829	LmjF.29.0840	-0.103502	5.0316e-57	1.00632e-53	0.052	0.213	hypothetical protein, conserved	N/A
1	34.1921	0.931829	LmjF.03.0130	-0.103868	8.97173e-39	1.79435e-35	0.044	0.334	acetyltransferase, putative	N-acetyltransferase activity
1	34.1921	0.931829	LmjF.07.0100	-0.103888	5.93907e-127	1.18781e-123	0.05	0.173	metallo-peptidase, Clan ME, Family M16C	metal ion binding
1	34.1921	0.931829	LmjF.36.2610	-0.103981	1.19941e-36	2.39883e-33	0.085	0.374	folylpolyglutamate synthetase	ATP binding;ligase activity;tetrahydrofolylpolyglutamate synthase activity
1	34.1921	0.931829	LmjF.34.3720	-0.104194	8.3273e-106	1.66546e-102	0.012	0.149	Protein of unknown function (DUF501), putative	N/A
1	34.1921	0.931829	LmjF.29.0450	-0.10422	6.1896e-06	0.0123792	0.035	0.286	recA bacterial DNA recombination protein, putative	N/A
1	34.1921	0.931829	LmjF.11.1190	-0.104418	1.29539e-10	2.59078e-07	0.295	0.562	40S ribosomal protein S15A, putative	structural constituent of ribosome
1	34.1921	0.931829	LmjF.26.2470	-0.104667	1.49134e-32	2.98268e-29	0.044	0.327	hypothetical protein, conserved	N/A
1	34.1921	0.931829	LmjF.15.0510	-0.104701	8.54456e-11	1.70891e-07	0.071	0.331	ecotin, putative	serine-type endopeptidase inhibitor activity
1	34.1921	0.931829	LmjF.25.0750	-0.105144	5.85515e-275	1.17103e-271	0.131	0.544	protein phosphatase 2C, putative	cation binding;phosphatase activity
1	34.1921	0.931829	LmjF.36.0190	-0.10519	4.94317e-21	9.88635e-18	0.932	0.986	elongation factor 2	GTP binding;GTPase activity
1	34.1921	0.931829	LmjF.33.1870	-0.105206	7.77374e-155	1.55475e-151	0.085	0.437	nucleolar GTP-binding protein, putative	GTP binding
1	34.1921	0.931829	LmjF.35.1910	-0.105243	2.1451e-40	4.29021e-37	0.515	0.811	ribosomal protein L15, putative	structural constituent of ribosome
1	34.1921	0.931829	LmjF.03.0960	-0.105445	1.59615e-88	3.19231e-85	0.161	0.493	hypothetical protein, conserved	N/A
1	34.1921	0.931829	LmjF.08.1110	-0.105755	3.60484e-11	7.20968e-08	0.11	0.371	stress-induced protein sti1	protein binding
1	34.1921	0.931829	LmjF.32.2370	-0.106688	7.19001e-37	1.438e-33	0.021	0.197	aquaporin-like protein	channel activity
1	34.1921	0.931829	LmjF.05.1110	-0.107022	8.31529e-12	1.66306e-08	0.018	0.221	hypothetical protein, conserved	nucleic acid binding
1	34.1921	0.931829	LmjF.13.0450	-0.107399	1.28735e-16	2.5747e-13	0.621	0.84	ALBA-domain protein 1	nucleic acid binding
1	34.1921	0.931829	LmjF.03.0570	-0.107591	5.68373e-190	1.13675e-186	0.055	0.42	quinone oxidoreductase, putative	oxidoreductase activity
1	34.1921	0.931829	LmjF.35.1200	-0.108061	5.32705e-16	1.06541e-12	0.031	0.226	pre-mRNA splicing factor ATP-dependent RNA helicase, putative	ATP binding;helicase activity;nucleic acid binding
1	34.1921	0.931829	LmjF.36.0320	-0.108215	0	0	0.132	0.554	proteasome subunit beta type-2, putative	threonine-type endopeptidase activity
1	34.1921	0.931829	LmjF.14.0660	-0.108491	4.04045e-11	8.08091e-08	0.138	0.33	fatty acid elongase, putative	N/A
1	34.1921	0.931829	LmjF.23.0760	-0.10853	1.45626e-169	2.91253e-166	0.05	0.406	mitochondrial RNA binding protein, putative	N/A
1	34.1921	0.931829	LmjF.33.1955	-0.109662	1.34741e-35	2.69482e-32	0.598	0.868	60S ribosomal protein L37	structural constituent of ribosome
1	34.1921	0.931829	LmjF.36.4940	-0.10982	3.49718e-138	6.99435e-135	0.05	0.168	Uncharacterized protein family UPF0029, putative	protein binding
1	34.1921	0.931829	LmjF.29.2740	-0.109833	2.14924e-213	4.29848e-210	0.014	0.111	actin-like protein, putative	N/A
1	34.1921	0.931829	LmjF.26.2330	-0.110032	5.97636e-30	1.19527e-26	0.424	0.716	60S ribosomal protein L35, putative	structural constituent of ribosome
1	34.1921	0.931829	LmjF.25.0260	-0.110172	5.694e-19	1.1388e-15	0.055	0.327	Dynein light chain 1, cytoplasmic, putative	N/A
1	34.1921	0.931829	LmjF.35.1830	-0.110439	5.6991e-298	1.13982e-294	0.128	0.551	hypothetical protein, conserved	N/A
1	34.1921	0.931829	LmjF.35.0420	-0.110483	1.85412e-27	3.70824e-24	0.374	0.662	40S ribosomal protein S3A, putative	structural constituent of ribosome
1	34.1921	0.931829	LmjF.04.0990	-0.111502	1.26892e-117	2.53784e-114	0.063	0.185	hypothetical protein, conserved	N/A
1	34.1921	0.931829	LmjF.21.0150	-0.111891	4.65018e-251	9.30036e-248	0.014	0.102	CAMK/CAMKL pseudokinase, putative	ATP binding;protein kinase activity
1	34.1921	0.931829	LmjF.29.0940	-0.11205	5.70072e-07	0.00114014	0.07	0.28	5-histidylcysteine sulfoxide synthase, putative	N/A
1	34.1921	0.931829	LmjF.12.1340	-0.112713	6.21124e-116	1.24225e-112	0.042	0.373	hypothetical protein, conserved	N/A
1	34.1921	0.931829	LmjF.36.1850	-0.113268	3.14897e-07	0.000629794	0.065	0.317	DEAD box RNA helicase, putative	ATP binding;helicase activity;nucleic acid binding
1	34.1921	0.931829	LmjF.27.1870	-0.113311	3.4257e-146	6.8514e-143	0.186	0.56	trypanothione synthetase	N/A
1	34.1921	0.931829	LmjF.10.1080	-0.113361	0	0	0.138	0.569	Eukaryotic translation initiation factor 4 gamma 5	RNA binding;protein binding
1	34.1921	0.931829	LmjF.35.3370	-0.113698	1.77536e-183	3.55072e-180	0.095	0.468	hypothetical protein, conserved	N/A
1	34.1921	0.931829	LmjF.34.2580	-0.114684	8.43968e-17	1.68794e-13	0.885	0.977	ALBA-domain protein 3	nucleic acid binding
1	34.1921	0.931829	LmjF.20.0890	-0.114771	1.25822e-15	2.51645e-12	0.017	0.215	Transcription elongation factor 1 domain-containing protein	N/A
1	34.1921	0.931829	LmjF.23.0360	-0.114967	2.58815e-89	5.1763e-86	0.065	0.199	NADP-dependent alcohol dehydrogenase, putative	oxidoreductase activity;zinc ion binding
1	34.1921	0.931829	LmjF.26.1665	-0.11531	1.17491e-64	2.34983e-61	0.069	0.217	hypothetical protein, conserved	N/A
1	34.1921	0.931829	LmjF.29.2850	-0.115339	1.33358e-114	2.66716e-111	0.034	0.365	hypothetical protein, conserved	N/A
1	34.1921	0.931829	LmjF.31.2740	-0.116099	2.1101e-94	4.2202e-91	0.063	0.197	Endoplasmic Reticulum-Golgi Intermediate Compartment (ERGIC)/Endoplasmic reticulum vesicle transporter, putative	N/A
1	34.1921	0.931829	LmjF.35.2220	-0.116109	2.98932e-20	5.97864e-17	0.107	0.291	kinetoplastid membrane protein-11	N/A
1	34.1921	0.931829	LmjF.23.0170	-0.116286	7.7426e-178	1.54852e-174	0.041	0.146	hypothetical protein, conserved	N/A
1	34.1921	0.931829	LmjF.27.1970	-0.116318	1.2361e-33	2.47219e-30	0.045	0.329	small nuclear ribonucleoprotein protein, putative	N/A
1	34.1921	0.931829	LmjF.24.1850	-0.116622	1.472e-11	2.944e-08	0.037	0.237	hypothetical predicted multi-pass transmembrane protein	N/A
1	34.1921	0.931829	LmjF.36.5150	-0.116756	8.01023e-298	1.60205e-294	0.131	0.553	kinesin-D	ATP binding;microtubule binding;microtubule motor activity
1	34.1921	0.931829	LmjF.05.1200	-0.116904	2.01162e-51	4.02324e-48	0.027	0.194	prefoldin subunit, putative	unfolded protein binding
1	34.1921	0.931829	LmjF.21.0430	-0.116991	5.54381e-108	1.10876e-104	0.259	0.615	hypothetical protein, conserved	N/A
1	34.1921	0.931829	LmjF.36.6880	-0.11708	4.7935e-19	9.58699e-16	0.029	0.298	Bromodomain factor 1	protein binding
1	34.1921	0.931829	LmjF.15.0390	-0.117603	1.41258e-46	2.82517e-43	0.024	0.193	cytoplasmic l-asparaginase i-like protein	N/A
1	34.1921	0.931829	LmjF.28.2940	-0.117716	9.33482e-08	0.000186696	0.034	0.242	hypothetical protein, unknown function	N/A
1	34.1921	0.931829	LmjF.27.2050	-0.117779	3.54281e-117	7.08562e-114	0.151	0.504	ribonucleoside-diphosphate reductase small chain, putative	oxidoreductase activity
1	34.1921	0.931829	LmjF.31.0270	-0.118309	3.42816e-250	6.85631e-247	0.029	0.112	2OG-Fe(II) oxygenase superfamily, putative	L-ascorbic acid binding;iron ion binding;oxidoreductase activity;oxidoreductase activity, acting on paired donors, with incorporation or reduction of molecular oxygen
1	34.1921	0.931829	LmjF.34.0705	-0.118561	5.61807e-131	1.12361e-127	0.015	0.144	Predicted membrane protein, putative	N/A
1	34.1921	0.931829	LmjF.19.1450	-0.118621	3.67522e-14	7.35045e-11	0.066	0.26	oxidoreductase-like protein	oxidoreductase activity
1	34.1921	0.931829	LmjF.16.1150	-0.118627	5.27583e-106	1.05517e-102	0.026	0.162	hypothetical protein, conserved	N/A
1	34.1921	0.931829	LmjF.31.2890	-0.118719	2.23724e-172	4.47447e-169	0.035	0.143	Region in Clathrin and VPS, putative	protein binding
1	34.1921	0.931829	LmjF.31.2850	-0.119647	8.29979e-99	1.65996e-95	0.036	0.173	ribosomal protein l7/l12-like protein	structural constituent of ribosome
1	34.1921	0.931829	LmjF.36.4210	-0.119872	9.96647e-26	1.99329e-22	0.04	0.318	WD domain, G-beta repeat/Utp21 specific WD40 associated putative domain containing protein, putative	catalytic activity;protein binding
1	34.1921	0.931829	LmjF.05.0290	-0.120472	1.35238e-152	2.70475e-149	0.106	0.465	phosphate carrier protein, mitochondrial precursor-like protein	N/A
1	34.1921	0.931829	LmjF.30.0620	-0.120876	4.69812e-121	9.39625e-118	0.009	0.141	ribosome biogenesis regulatory protein (RRS1), putative	N/A
1	34.1921	0.931829	LmjF.32.1960	-0.121407	2.62373e-209	5.24746e-206	0.035	0.132	1-acyl-sn-glycerol-3-phosphateacyltransferase-like protein, putative	transferase activity, transferring acyl groups
1	34.1921	0.931829	LmjF.31.1590	-0.122102	5.05093e-98	1.01019e-94	0.038	0.177	hypothetical protein, conserved	N/A
1	34.1921	0.931829	LmjF.15.0940	-0.122374	1.76154e-94	3.52308e-91	0.075	0.412	Nucleus and spindle associated protein 2, putative	N/A
1	34.1921	0.931829	LmjF.35.2880	-0.122395	1.09881e-20	2.19761e-17	0.015	0.206	Sybindin-like family, putative	N/A
1	34.1921	0.931829	LmjF.12.0290	-0.122515	1.17173e-40	2.34345e-37	0.048	0.217	hypothetical protein, unknown function	N/A
1	34.1921	0.931829	LmjF.01.0590	-0.12273	1.79841e-18	3.59682e-15	0.033	0.304	mitochondrial RNA editing ligase 1	ATP binding;RNA ligase (ATP) activity;ligase activity
1	34.1921	0.931829	LmjF.30.1420	-0.122741	5.83724e-159	1.16745e-155	0.034	0.145	ama1 protein, putative	N/A
1	34.1921	0.931829	LmjF.23.0547	-0.122965	1.3321e-134	2.6642e-131	0.042	0.161	hypothetical protein, conserved	N/A
1	34.1921	0.931829	LmjF.17.0310	-0.124134	1.2964e-169	2.5928e-166	0.029	0.14	hypothetical protein, conserved	N/A
1	34.1921	0.931829	LmjF.24.0200	-0.124329	2.97992e-247	5.95983e-244	0.019	0.107	transcription elongation factor-like protein	N/A
1	34.1921	0.931829	LmjF.04.1190	-0.124608	7.92927e-12	1.58585e-08	0.066	0.264	tRNA nucleotidyltransferase, putative	RNA binding;nucleotidyltransferase activity
1	34.1921	0.931829	LmjF.14.1270	-0.125062	5.64997e-13	1.12999e-09	0.341	0.611	ubiquitin/ribosomal protein S27a, putative	protein binding;structural constituent of ribosome
1	34.1921	0.931829	LmjF.26.0020	-0.125536	1.03475e-07	0.00020695	0.042	0.248	methylmalonyl-coa epimerase-like protein	N/A
1	34.1921	0.931829	LmjF.17.1330	-0.125605	1.97788e-141	3.95576e-138	0.034	0.154	hypothetical protein, conserved	N/A
1	34.1921	0.931829	LmjF.10.0218	-0.125676	2.91002e-55	5.82004e-52	0.074	0.374	hypothetical protein, unknown function	N/A
1	34.1921	0.931829	LmjF.35.1430	-0.126	2.68273e-09	5.36545e-06	0.143	0.396	60S ribosomal protein L2, putative	structural constituent of ribosome
1	34.1921	0.931829	LmjF.33.1880	-0.12607	1.64031e-15	3.28062e-12	0.041	0.235	hypothetical protein, conserved	protein binding
1	34.1921	0.931829	LmjF.20.1560	-0.126483	1.01673e-73	2.03347e-70	0.055	0.204	amidohydrolase, putative	hydrolase activity
1	34.1921	0.931829	LmjF.17.0083	-0.126531	4.09947e-19	8.19895e-16	0.789	0.935	elongation factor 1-alpha	GTP binding;GTPase activity;translation elongation factor activity
1	34.1921	0.931829	LmjF.29.1860	-0.126533	1.38184e-71	2.76369e-68	0.028	0.181	hypothetical protein, conserved	N/A
1	34.1921	0.931829	LmjF.25.0930	-0.126602	1.11483e-101	2.22966e-98	0.064	0.396	Ankyrin repeats (many copies), putative	protein binding
1	34.1921	0.931829	LmjF.20.0640	-0.126736	5.24113e-13	1.04823e-09	0.09	0.364	kinesin heavy chain, putative	ATP binding;microtubule binding;microtubule motor activity
1	34.1921	0.931829	LmjF.30.3190	-0.127214	1.53894e-24	3.07788e-21	0.093	0.375	3-hydroxy-3-methylglutaryl-CoA reductase	hydroxymethylglutaryl-CoA reductase (NADPH) activity;oxidoreductase activity, acting on the CH-OH group of donors, NAD or NADP as acceptor;protein binding
1	34.1921	0.931829	LmjF.13.0880	-0.127438	0	0	0.123	0.551	hypothetical protein, conserved	N/A
1	34.1921	0.931829	LmjF.31.2880	-0.128007	2.10896e-41	4.21792e-38	0.102	0.399	aldehyde reductase, putative	oxidoreductase activity
1	34.1921	0.931829	LmjF.18.0140	-0.128138	2.83788e-129	5.67577e-126	0.041	0.165	Domain of unknown function DUF21, putative	N/A
1	34.1921	0.931829	LmjF.22.0260	-0.128306	1.53244e-57	3.06487e-54	0.121	0.427	translocon-associated protein (TRAP), alpha subunit, putative	N/A
1	34.1921	0.931829	LmjF.25.0360	-0.128834	3.64136e-11	7.28272e-08	0.018	0.278	hypothetical protein, conserved	N/A
1	34.1921	0.931829	LmjF.36.6050	-0.129066	3.34753e-42	6.69506e-39	0.064	0.355	hypothetical protein, conserved	N/A
1	34.1921	0.931829	LmjF.17.0780	-0.129396	1.82585e-24	3.6517e-21	0.11	0.291	Acyl CoA binding protein, putative	fatty-acyl-CoA binding
1	34.1921	0.931829	LmjF.30.0805	-0.129474	3.13577e-45	6.27154e-42	0.059	0.354	hypothetical protein, conserved	N/A
1	34.1921	0.931829	LmjF.29.1090	-0.129881	2.06493e-70	4.12985e-67	0.011	0.167	ribosomal protein L1a, putative	structural constituent of ribosome
1	34.1921	0.931829	LmjF.31.2490	-0.129893	1.50207e-94	3.00414e-91	0.039	0.177	ferredoxin, 2fe-2s-like protein	2 iron, 2 sulfur cluster binding;electron transfer activity;iron-sulfur cluster binding
1	34.1921	0.931829	LmjF.10.0620	-0.129895	0	0	0.139	0.599	FLA1-binding protein	N/A
1	34.1921	0.931829	LmjF.23.1720	-0.130048	3.97754e-42	7.95508e-39	0.049	0.218	hypothetical protein, conserved	N/A
1	34.1921	0.931829	LmjF.22.1560	-0.130225	9.02645e-130	1.80529e-126	0.03	0.155	60S ribosomal protein L14, putative	RNA binding;structural constituent of ribosome
1	34.1921	0.931829	LmjF.30.1180	-0.130267	8.30988e-10	1.66198e-06	0.046	0.306	transmembrane protein, putative	N/A
1	34.1921	0.931829	LmjF.36.2020	-0.130281	4.96207e-41	9.92414e-38	0.247	0.548	chaperonin HSP60, mitochondrial precursor	ATP binding
1	34.1921	0.931829	LmjF.18.1310	-0.130362	1.77276e-18	3.54553e-15	0.101	0.378	Acetyltransferase (GNAT) family, putative	N-acetyltransferase activity
1	34.1921	0.931829	LmjF.27.0750	-0.130478	3.54809e-148	7.09619e-145	0.126	0.484	Stress responsive A/B Barrel Domain, putative	N/A
1	34.1921	0.931829	LmjF.04.0460	-0.13053	1.52251e-120	3.04502e-117	0.053	0.179	adenylosuccinate lyase, putative	N6-(1,2-dicarboxyethyl)AMP AMP-lyase (fumarate-forming) activity;catalytic activity
1	34.1921	0.931829	LmjF.36.0930	-0.13079	1.06538e-23	2.13076e-20	0.37	0.653	40S ribosomal protein S18, putative	RNA binding;nucleic acid binding;structural constituent of ribosome
1	34.1921	0.931829	LmjF.35.2050	-0.131102	2.31295e-20	4.62591e-17	0.79	0.94	60S ribosomal protein L32	structural constituent of ribosome
1	34.1921	0.931829	LmjF.36.0940	-0.131104	3.8894e-20	7.77879e-17	0.058	0.334	40S ribosomal protein S18, putative	RNA binding;nucleic acid binding;structural constituent of ribosome
1	34.1921	0.931829	LmjF.32.0850	-0.13126	8.03768e-154	1.60754e-150	0.041	0.156	polypyrimidine tract-binding protein, putative	nucleic acid binding
1	34.1921	0.931829	LmjF.06.0200	-0.131349	2.81157e-64	5.62314e-61	0.078	0.391	hypothetical protein, conserved	N/A
1	34.1921	0.931829	LmjF.15.0380	-0.131374	7.00438e-47	1.40088e-43	0.546	0.836	60S acidic ribosomal protein, putative	structural constituent of ribosome
1	34.1921	0.931829	LmjF.16.0540	-0.131421	6.1748e-82	1.23496e-78	0.053	0.196	aspartate carbamoyltransferase, putative	amino acid binding;aspartate carbamoyltransferase activity;carboxyl- or carbamoyltransferase activity
1	34.1921	0.931829	LmjF.14.0500	-0.131646	7.02736e-151	1.40547e-147	0.021	0.14	hypothetical protein, unknown function	N/A
1	34.1921	0.931829	LmjF.35.1250	-0.131802	4.37526e-22	8.75053e-19	0.041	0.229	monothiol glutaredoxin, putative	protein disulfide oxidoreductase activity
1	34.1921	0.931829	LmjF.31.0140	-0.131952	1.05444e-05	0.0210889	0.078	0.284	ubiquitin carboxyl-terminal hydrolase, putative	protein binding;thiol-dependent ubiquitin-specific protease activity
1	34.1921	0.931829	LmjF.16.0460	-0.132664	6.77717e-55	1.35543e-51	0.308	0.622	60S ribosomal protein L21, putative	structural constituent of ribosome
1	34.1921	0.931829	LmjF.06.1040	-0.132888	5.02791e-206	1.00558e-202	0.027	0.125	hypothetical protein, conserved	N/A
1	34.1921	0.931829	LmjF.06.0380	-0.133037	9.10811e-168	1.82162e-164	0.033	0.144	Present in the outer mitochondrial membrane proteome 35	metal ion binding
1	34.1921	0.931829	LmjF.09.0670	-0.133957	1.10129e-17	2.20257e-14	0.057	0.328	prefoldin subunit 2, putative	unfolded protein binding
1	34.1921	0.931829	LmjF.12.0330	-0.134739	3.93691e-223	7.87382e-220	0.033	0.123	hypothetical protein, unknown function	N/A
1	34.1921	0.931829	LmjF.31.3070	-0.135613	6.23945e-118	1.24789e-114	0.045	0.172	iron/zinc transporter protein-like protein	metal ion transmembrane transporter activity
1	34.1921	0.931829	LmjF.21.0710	-0.135849	3.31556e-46	6.63112e-43	0.078	0.239	ATP-binding cassette protein subfamily E, member 1, putative	ATP binding;ATPase activity
1	34.1921	0.931829	LmjF.32.3130	-0.135873	1.74727e-24	3.49455e-21	0.425	0.7	ribosomal protein L3, putative	structural constituent of ribosome
1	34.1921	0.931829	LmjF.26.0350	-0.136452	1.23562e-115	2.47124e-112	0.038	0.168	Vps52 / Sac2 family, putative	N/A
1	34.1921	0.931829	LmjF.25.0320	-0.136469	3.48809e-221	6.97619e-218	0.13	0.527	B9 domain-containing protein 2	N/A
1	34.1921	0.931829	LmjF.36.6870	-0.136638	4.09158e-35	8.18316e-32	0.051	0.225	EVE domain containing protein, putative	N/A
1	34.1921	0.931829	LmjF.04.1110	-0.136897	2.11564e-235	4.23128e-232	0.026	0.114	proton motive ATPase, putative	nucleotide binding
1	34.1921	0.931829	LmjF.27.0110	-0.137668	1.12057e-151	2.24114e-148	0.175	0.546	hypothetical protein, conserved	N/A
1	34.1921	0.931829	LmjF.15.0950	-0.138387	6.76249e-28	1.3525e-24	0.605	0.849	40S ribosomal protein S3, putative	RNA binding;structural constituent of ribosome
1	34.1921	0.931829	LmjF.36.1100	-0.138408	1.38161e-07	0.000276322	0.068	0.274	ribosomal protein L24, putative	N/A
1	34.1921	0.931829	LmjF.19.1610	-0.13843	2.76471e-08	5.52943e-05	0.02	0.227	protein kinase, putative	ATP binding;protein kinase activity
1	34.1921	0.931829	LmjF.30.2540	-0.138998	4.54213e-194	9.08427e-191	0.013	0.119	AAA family ATPase-like protein	ATP binding;ATPase activity
1	34.1921	0.931829	LmjF.22.0800	-0.139276	6.28467e-39	1.25693e-35	0.033	0.319	hypothetical protein, conserved	N/A
1	34.1921	0.931829	LmjF.35.3100	-0.140424	9.00821e-22	1.80164e-18	0.731	0.929	ATP-dependent RNA helicase, putative	ATP binding;helicase activity;nucleic acid binding
1	34.1921	0.931829	LmjF.21.0880	-0.140998	2.63615e-77	5.2723e-74	0.046	0.192	ABC transporter, putative	ATP binding
1	34.1921	0.931829	LmjF.23.1180	-0.14113	4.26327e-150	8.52654e-147	0.023	0.143	Uncharacterised protein family UPF0546, putative	N/A
1	34.1921	0.931829	LmjF.36.2800	-0.141339	5.28402e-226	1.0568e-222	0.053	0.436	hypothetical protein, conserved	N/A
1	34.1921	0.931829	LmjF.33.3180	-0.141689	5.59379e-108	1.11876e-104	0.076	0.414	hypothetical protein, conserved	N/A
1	34.1921	0.931829	LmjF.21.1605	-0.141767	4.72992e-29	9.45983e-26	0.035	0.219	hypothetical protein, conserved	N/A
1	34.1921	0.931829	LmjF.23.0960	-0.142163	5.06886e-205	1.01377e-201	0.074	0.448	hypothetical protein, conserved	N/A
1	34.1921	0.931829	LmjF.07.0500	-0.142306	4.51379e-62	9.02757e-59	0.415	0.743	60S ribosomal protein L7a, putative	N/A
1	34.1921	0.931829	LmjF.35.0140	-0.142915	3.97338e-118	7.94676e-115	0.12	0.465	hypothetical protein, conserved	N/A
1	34.1921	0.931829	LmjF.36.2120	-0.143044	3.30381e-28	6.60763e-25	0.055	0.346	hypothetical protein, conserved	N/A
1	34.1921	0.931829	LmjF.31.1660	-0.143208	2.62588e-10	5.25176e-07	0.037	0.297	GINS complex subunit Psf3, putative	N/A
1	34.1921	0.931829	LmjF.32.2930	-0.143326	2.10478e-261	4.20957e-258	0.069	0.464	tubulin-tyrosine ligase-like protein	N/A
1	34.1921	0.931829	LmjF.30.0690	-0.143629	1.99462e-15	3.98924e-12	0.029	0.225	40S ribosomal protein S30, putative	structural constituent of ribosome
1	34.1921	0.931829	LmjF.07.1080	-0.144004	4.95614e-119	9.91228e-116	0.055	0.395	hypothetical protein, conserved	protein binding
1	34.1921	0.931829	LmjF.17.1370	-0.144572	7.12682e-35	1.42536e-31	0.036	0.212	NUC130/3NT domain/SDA1, putative	N/A
1	34.1921	0.931829	LmjF.31.1620	-0.144712	1.89949e-73	3.79898e-70	0.046	0.195	Protein of unknown function DUF84, putative	N/A
1	34.1921	0.931829	LmjF.15.0820	-0.144727	4.8085e-102	9.617e-99	0.056	0.189	GDP dissociation inhibitor, putative	GDP-dissociation inhibitor activity
1	34.1921	0.931829	LmjF.21.1090	-0.145266	6.56803e-184	1.31361e-180	0.215	0.607	T-complex protein 1, delta subunit, putative	ATP binding;unfolded protein binding
1	34.1921	0.931829	LmjF.31.1700	-0.146098	2.54384e-143	5.08768e-140	0.042	0.159	hypothetical protein, conserved	protein binding
1	34.1921	0.931829	LmjF.30.2600	-0.146154	3.24906e-131	6.49813e-128	0.051	0.171	formate--tetrahydrofolate ligase	ATP binding;formate-tetrahydrofolate ligase activity
1	34.1921	0.931829	LmjF.02.0450	-0.146603	1.31789e-52	2.63579e-49	0.183	0.495	voltage-dependent anion-selective channel, putative	voltage-gated anion channel activity
1	34.1921	0.931829	LmjF.19.0190	-0.146687	1.1753e-198	2.35061e-195	0.128	0.508	multiprotein-bridging factor 1, putative	DNA binding
1	34.1921	0.931829	LmjF.31.1165	-0.146739	9.15898e-79	1.8318e-75	0.05	0.197	hypothetical protein	N/A
1	34.1921	0.931829	LmjF.16.0140	-0.147141	6.64844e-146	1.32969e-142	0.043	0.158	eukaryotic translation initiation factor 1A, putative	RNA binding;translation initiation factor activity
1	34.1921	0.931829	LmjF.36.5180	-0.14727	1.2172e-37	2.43439e-34	0.08	0.25	aldehyde dehydrogenase, putative	oxidoreductase activity;oxidoreductase activity, acting on the aldehyde or oxo group of donors, NAD or NADP as acceptor
1	34.1921	0.931829	LmjF.26.0190	-0.147321	6.95226e-126	1.39045e-122	0.034	0.159	Scaffold protein Nfu/NifU N terminal/NifU-like domain containing protein, putative	iron ion binding;iron-sulfur cluster binding
1	34.1921	0.931829	LmjF.24.1680	-0.147514	3.36714e-53	6.73429e-50	0.037	0.336	Ssl1-like, putative	N/A
1	34.1921	0.931829	LmjF.30.2520	-0.147949	1.01636e-42	2.03271e-39	0.056	0.355	hypothetical protein, conserved	protein binding
1	34.1921	0.931829	LmjF.24.2210	-0.148076	5.17635e-91	1.03527e-87	0.435	0.787	60S ribosomal protein L12, putative	structural constituent of ribosome
1	34.1921	0.931829	LmjF.12.1090	-0.148916	2.92454e-07	0.000584909	0.273	0.531	surface antigen protein, putative	N/A
1	34.1921	0.931829	LmjF.28.0960	-0.15006	3.96656e-19	7.93312e-16	0.421	0.694	40S ribosomal protein S14	structural constituent of ribosome
1	34.1921	0.931829	LmjF.35.4470	-0.150303	1.9907e-56	3.9814e-53	0.46	0.777	Co-chaperone protein P23	N/A
1	34.1921	0.931829	LmjF.11.0020	-0.151077	5.03638e-87	1.00728e-83	0.025	0.171	Endoplasmic Reticulum-Golgi Intermediate Compartment (ERGIC)/Endoplasmic reticulum vesicle transporter, putative	N/A
1	34.1921	0.931829	LmjF.18.1180	-0.151526	5.11206e-106	1.02241e-102	0.087	0.421	hypothetical protein, conserved	N/A
1	34.1921	0.931829	LmjF.17.0370	-0.152047	2.8171e-177	5.6342e-174	0.027	0.135	hypothetical protein, unknown function	N/A
1	34.1921	0.931829	LmjF.35.3860	-0.15207	4.43867e-12	8.87735e-09	0.157	0.425	T-complex protein 1, eta subunit, putative	ATP binding;unfolded protein binding
1	34.1921	0.931829	LmjF.32.3780	-0.152448	7.46684e-19	1.49337e-15	0.045	0.24	kinetoplast-associated protein 3, putative	N/A
1	34.1921	0.931829	LmjF.14.0230	-0.152498	1.27478e-119	2.54956e-116	0.041	0.167	hypothetical protein, conserved	N/A
1	34.1921	0.931829	LmjF.30.2845	-0.153297	6.0839e-22	1.21678e-18	0.05	0.239	succinate dehydrogenase subunit 3	N/A
1	34.1921	0.931829	LmjF.35.5100	-0.153523	7.3763e-66	1.47526e-62	0.228	0.55	60S ribosomal protein L37	structural constituent of ribosome
1	34.1921	0.931829	LmjF.24.1510	-0.154249	4.36735e-13	8.7347e-10	0.167	0.435	translationally controlled tumor protein (TCTP), putative	N/A
1	34.1921	0.931829	LmjF.31.0070	-0.154314	2.93432e-57	5.86863e-54	0.067	0.229	helicase-like protein	ATP binding;DNA binding;hydrolase activity
1	34.1921	0.931829	LmjF.34.2540	-0.154506	8.99341e-155	1.79868e-151	0.102	0.469	Coiled-coil and C2 domain-containing protein	N/A
1	34.1921	0.931829	LmjF.11.0780	-0.154566	9.05728e-24	1.81146e-20	0.603	0.842	40S ribosomal protein S21, putative	structural constituent of ribosome
1	34.1921	0.931829	LmjF.31.2250	-0.154923	3.99555e-105	7.99109e-102	0.055	0.187	3,2-trans-enoyl-CoA isomerase, mitochondrial precursor, putative	catalytic activity
1	34.1921	0.931829	LmjF.29.1040	-0.155078	0	0	0.101	0.523	Flagellar Member 6	N/A
1	34.1921	0.931829	LmjF.35.4500	-0.155666	5.30117e-27	1.06023e-23	0.034	0.313	anaphase promoting complex subunit protein, putative	cullin family protein binding;ubiquitin protein ligase activity;zinc ion binding
1	34.1921	0.931829	LmjF.15.0200	-0.155989	1.64689e-13	3.29379e-10	0.31	0.582	60S ribosomal protein L13a, putative	structural constituent of ribosome
1	34.1921	0.931829	LmjF.18.1190	-0.156056	1.13468e-259	2.26936e-256	0.018	0.102	hypothetical protein, conserved	N/A
1	34.1921	0.931829	LmjF.36.1955	-0.156067	1.13421e-30	2.26843e-27	0.052	0.23	TLD, putative	N/A
1	34.1921	0.931829	LmjF.12.0080	-0.156944	2.00757e-25	4.01514e-22	0.035	0.224	kinetoplastid kinetochore protein 6, putative	N/A
1	34.1921	0.931829	LmjF.23.1590	-0.156979	1.26019e-261	2.52038e-258	0.02	0.103	oxidoreductase-like protein	oxidoreductase activity
1	34.1921	0.931829	LmjF.01.0410	-0.157233	1.0606e-35	2.1212e-32	0.383	0.684	ribosomal protein S7, putative	structural constituent of ribosome
1	34.1921	0.931829	LmjF.07.0450	-0.157401	3.12428e-236	6.24856e-233	0.012	0.105	hypothetical protein, conserved	N/A
1	34.1921	0.931829	LmjF.23.1150	-0.158271	1.41015e-129	2.82029e-126	0.036	0.161	hypothetical protein, conserved	N/A
1	34.1921	0.931829	LmjF.27.2335	-0.158432	6.60102e-98	1.3202e-94	0.024	0.164	hypothetical protein, conserved	N/A
1	34.1921	0.931829	LmjF.30.3730	-0.158445	1.72132e-97	3.44264e-94	0.052	0.189	60S acidic ribosomal protein P2, putative	structural constituent of ribosome
1	34.1921	0.931829	LmjF.35.2660	-0.158671	1.44137e-43	2.88274e-40	0.071	0.369	hypothetical protein, conserved	N/A
1	34.1921	0.931829	LmjF.10.0080	-0.158782	3.23301e-153	6.46603e-150	0.037	0.151	hypothetical protein, unknown function	N/A
1	34.1921	0.931829	LmjF.26.0620	-0.16015	4.91432e-157	9.82865e-154	0.297	0.687	10 kDa heat shock protein, putative	N/A
1	34.1921	0.931829	LmjF.31.0190	-0.161296	4.90154e-141	9.80308e-138	0.038	0.157	nucleolar protein, putative	RNA binding;S-adenosylmethionine-dependent methyltransferase activity;methyltransferase activity
1	34.1921	0.931829	LmjF.05.0450	-0.161787	2.13971e-25	4.27943e-22	0.087	0.264	hypothetical protein, conserved	N/A
1	34.1921	0.931829	LmjF.15.1345	-0.162341	1.06471e-99	2.12942e-96	0.033	0.173	hypothetical protein, conserved	N/A
1	34.1921	0.931829	LmjF.05.0010	-0.162578	1.69679e-09	3.39359e-06	0.027	0.234	hypothetical protein, conserved	N/A
1	34.1921	0.931829	LmjF.27.0290	-0.162634	3.17768e-17	6.35536e-14	0.095	0.286	acyl carrier protein, mitochondrial, putative	N/A
1	34.1921	0.931829	LmjF.27.0090	-0.162641	5.51057e-08	0.000110211	0.046	0.254	cytochrome p450-like protein	heme binding;iron ion binding;monooxygenase activity;oxidoreductase activity, acting on paired donors, with incorporation or reduction of molecular oxygen
1	34.1921	0.931829	LmjF.01.0030	-0.162705	0	0	0.081	0.518	Kinesin-13 1, putative	ATP binding;microtubule binding;microtubule motor activity
1	34.1921	0.931829	LmjF.30.3720	-0.163001	1.46575e-09	2.93151e-06	0.136	0.396	60S acidic ribosomal protein P2, putative	structural constituent of ribosome
1	34.1921	0.931829	LmjF.03.0430	-0.163335	3.46372e-18	6.92744e-15	0.106	0.295	60S acidic ribosomal protein P2, putative	structural constituent of ribosome
1	34.1921	0.931829	LmjF.20.1620	-0.164121	5.8386e-253	1.16772e-249	0.028	0.112	CHORD, putative	N/A
1	34.1921	0.931829	LmjF.24.1210	-0.164228	1.26171e-49	2.52342e-46	0.061	0.226	Eukaryotic translation initiation factor 1, putative	translation initiation factor activity
1	34.1921	0.931829	LmjF.33.0920	-0.164672	8.88247e-33	1.77649e-29	0.405	0.693	40S ribosomal protein S3, putative	RNA binding;structural constituent of ribosome
1	34.1921	0.931829	LmjF.26.2210	-0.164815	5.53888e-217	1.10778e-213	0.065	0.444	AAA ATPase domain containing protein, putative	N/A
1	34.1921	0.931829	LmjF.26.1640	-0.165201	3.7311e-22	7.4622e-19	0.776	0.934	40S ribosomal protein S33, putative	structural constituent of ribosome
1	34.1921	0.931829	LmjF.36.2660	-0.165358	6.67509e-28	1.33502e-24	0.023	0.3	dihydrolipoamide acetyltransferase precursor, putative	transferase activity, transferring acyl groups
1	34.1921	0.931829	LmjF.07.0510	-0.165542	2.54434e-31	5.08868e-28	0.465	0.743	60S ribosomal protein L7a, putative	N/A
1	34.1921	0.931829	LmjF.21.0780	-0.165722	1.20875e-78	2.4175e-75	0.031	0.183	hypothetical protein, conserved	N/A
1	34.1921	0.931829	LmjF.31.3140	-0.166037	7.99957e-96	1.59991e-92	0.047	0.183	hypothetical protein, conserved	N/A
1	34.1921	0.931829	LmjF.22.0050	-0.166573	1.17049e-190	2.34098e-187	0.02	0.124	hypothetical protein, conserved	N/A
1	34.1921	0.931829	LmjF.35.1450	-0.167284	4.35285e-12	8.70571e-09	0.093	0.296	hypothetical protein, conserved	N/A
1	34.1921	0.931829	LmjF.30.0770	-0.167355	4.22527e-85	8.45055e-82	0.079	0.404	hypothetical protein, conserved	N/A
1	34.1921	0.931829	LmjF.34.0910	-0.167872	5.05875e-110	1.01175e-106	0.183	0.535	hypothetical protein, conserved	N/A
1	34.1921	0.931829	LmjF.06.0570	-0.1687	2.35765e-230	4.7153e-227	0.026	0.119	60S ribosomal protein L23a, putative	structural constituent of ribosome
1	34.1921	0.931829	LmjF.14.0670	-0.169056	7.65791e-188	1.53158e-184	0.244	0.649	fatty acid elongase, putative	N/A
1	34.1921	0.931829	LmjF.04.0850	-0.169714	1.7417e-07	0.000348341	0.066	0.272	serine peptidase, Clan S-, family S54, putative	serine-type endopeptidase activity
1	34.1921	0.931829	LmjF.06.0290	-0.169867	4.42643e-101	8.85287e-98	0.017	0.158	ribonuclease H1, putative	RNA-DNA hybrid ribonuclease activity;magnesium ion binding;nucleic acid binding
1	34.1921	0.931829	LmjF.15.0010	-0.170374	1.52648e-45	3.05295e-42	0.342	0.65	histone H4	DNA binding;protein heterodimerization activity
1	34.1921	0.931829	LmjF.34.1190	-0.170549	2.16854e-106	4.33708e-103	0.044	0.18	ATP-dependent RNA helicase-like protein	ATP binding;helicase activity;nucleic acid binding
1	34.1921	0.931829	LmjF.36.1570	-0.171075	1.79111e-43	3.58222e-40	0.024	0.321	hypothetical protein, conserved	N/A
1	34.1921	0.931829	LmjF.20.1440	-0.171898	1.02068e-89	2.04136e-86	0.054	0.194	hypothetical protein, conserved	N/A
1	34.1921	0.931829	LmjF.05.0350	-0.171912	1.54274e-07	0.000308547	0.137	0.343	trypanothione reductase	disulfide oxidoreductase activity;flavin adenine dinucleotide binding;oxidoreductase activity;oxidoreductase activity, acting on a sulfur group of donors, NAD(P) as acceptor
1	34.1921	0.931829	LmjF.30.3700	-0.17208	5.47155e-231	1.09431e-227	0.057	0.44	hypothetical protein, conserved	N/A
1	34.1921	0.931829	LmjF.34.0970	-0.17308	8.05828e-48	1.61166e-44	0.524	0.828	amastin-like protein	N/A
1	34.1921	0.931829	LmjF.21.0740	-0.173166	1.66846e-28	3.33691e-25	0.25	0.541	ATPase subunit 9, putative	proton transmembrane transporter activity
1	34.1921	0.931829	LmjF.35.2840	-0.173235	4.73899e-61	9.47798e-58	0.047	0.206	aminotransferase, putative	catalytic activity;cysteine desulfurase activity;pyridoxal phosphate binding
1	34.1921	0.931829	LmjF.34.2820	-0.174034	2.56089e-29	5.12178e-26	0.159	0.45	regulatory subunit of protein kinase a-like protein	N/A
1	34.1921	0.931829	LmjF.36.3840	-0.17562	1.05244e-51	2.10489e-48	0.16	0.471	glycyl tRNA synthetase, putative	ATP binding;glycine-tRNA ligase activity;nucleotide binding
1	34.1921	0.931829	LmjF.32.1640	-0.175795	1.05436e-111	2.10873e-108	0.043	0.381	chromosomal passenger complex 2	N/A
1	34.1921	0.931829	LmjF.29.1500	-0.176042	1.36775e-29	2.73551e-26	0.533	0.793	Nodulin-like, putative	N/A
1	34.1921	0.931829	LmjF.26.1940	-0.176377	1.84624e-216	3.69247e-213	0.008	0.106	Thioesterase-like superfamily, putative	N/A
1	34.1921	0.931829	LmjF.23.0080	-0.17644	2.69037e-12	5.38074e-09	0.166	0.439	hypothetical protein, conserved	N/A
1	34.1921	0.931829	LmjF.21.1860	-0.176794	6.91819e-35	1.38364e-31	0.576	0.825	beta tubulin	GTP binding;GTPase activity;structural constituent of cytoskeleton
1	34.1921	0.931829	LmjF.23.0560	-0.176934	0	0	0.173	0.618	kinesin-C	ATP binding;microtubule binding;microtubule motor activity
1	34.1921	0.931829	LmjF.24.2050	-0.177047	7.83854e-70	1.56771e-66	0.48	0.803	60S ribosomal protein L26, putative	RNA binding;structural constituent of ribosome
1	34.1921	0.931829	LmjF.18.1580	-0.177334	1.21113e-256	2.42226e-253	0.087	0.482	nonspecific nucleoside hydrolase	hydrolase activity, hydrolyzing N-glycosyl compounds
1	34.1921	0.931829	LmjF.35.1440	-0.178313	3.82778e-26	7.65557e-23	0.362	0.644	60S ribosomal protein L2, putative	structural constituent of ribosome
1	34.1921	0.931829	LmjF.27.1240	-0.178493	5.94096e-15	1.18819e-11	0.183	0.455	histone H1, putative	N/A
1	34.1921	0.931829	LmjF.36.6620	-0.178614	5.9163e-55	1.18326e-51	0.06	0.218	hypothetical protein, conserved	N/A
1	34.1921	0.931829	LmjF.30.1610	-0.178907	9.8173e-92	1.96346e-88	0.058	0.195	ferric reductase transmembrane protein, putative	oxidoreductase activity
1	34.1921	0.931829	LmjF.36.2750	-0.17945	8.61447e-47	1.72289e-43	0.073	0.24	acetyltransferase-like protein	N-acetyltransferase activity
1	34.1921	0.931829	LmjF.36.3270	-0.179479	2.36667e-18	4.73333e-15	0.296	0.576	60S ribosomal protein L22, putative	structural constituent of ribosome
1	34.1921	0.931829	LmjF.33.3150	-0.179668	3.10315e-116	6.2063e-113	0.369	0.733	40S ribosomal protein S13, putative	structural constituent of ribosome
1	34.1921	0.931829	LmjF.32.0760	-0.180172	2.56853e-12	5.13706e-09	0.026	0.226	cyclin 9, putative	cyclin-dependent protein serine/threonine kinase regulator activity
1	34.1921	0.931829	LmjF.19.0140	-0.180422	1.81223e-166	3.62447e-163	0.126	0.5	Associated kinase of Tb14-3-3, putative	ATP binding;protein kinase activity
1	34.1921	0.931829	LmjF.18.1030	-0.180568	1.72293e-05	0.0344585	0.067	0.324	hypothetical protein, conserved	N/A
1	34.1921	0.931829	LmjF.04.1165	-0.18075	5.7158e-187	1.14316e-183	0.035	0.142	hypothetical protein	N/A
1	34.1921	0.931829	LmjF.27.2330	-0.18155	2.0056e-51	4.0112e-48	0.072	0.231	GTP binding protein, putative	GTP binding
1	34.1921	0.931829	LmjF.09.0030	-0.181583	8.42033e-163	1.68407e-159	0.022	0.135	Peroxisomal biogenesis factor 11 (PEX11), putative	N/A
1	34.1921	0.931829	LmjF.36.5365	-0.181776	4.82949e-07	0.000965899	0.021	0.232	hypothetical protein, conserved	protein binding
1	34.1921	0.931829	LmjF.31.3110	-0.182635	1.27452e-192	2.54904e-189	0.022	0.129	Flagellum attachment zone protein 14	N/A
1	34.1921	0.931829	LmjF.31.1440	-0.182868	3.99763e-46	7.99525e-43	0.222	0.529	hypothetical protein, unknown function (pseudogene)	N/A
1	34.1921	0.931829	LmjF.35.0570	-0.183977	4.02312e-124	8.04624e-121	0.11	0.46	hypothetical protein, conserved	protein binding
1	34.1921	0.931829	LmjF.32.0400	-0.184043	7.98133e-231	1.59627e-227	0.247	0.665	ATP-dependent RNA helicase HEL67	ATP binding;helicase activity;nucleic acid binding
1	34.1921	0.931829	LmjF.36.1970	-0.185004	1.24588e-268	2.49177e-265	0.021	0.102	2OG-Fe(II) oxygenase superfamily, putative	oxidoreductase activity
1	34.1921	0.931829	LmjF.24.0460	-0.185725	9.40796e-24	1.88159e-20	0.037	0.313	ubiquitin-activating enzyme, putative	ubiquitin-like modifier activating enzyme activity
1	34.1921	0.931829	LmjF.35.1230	-0.186564	1.6844e-131	3.36879e-128	0.108	0.46	short chain dehydrogenase, putative	N/A
1	34.1921	0.931829	LmjF.23.0600	-0.187226	2.2377e-26	4.4754e-23	0.052	0.236	hypothetical protein, conserved	N/A
1	34.1921	0.931829	LmjF.06.1050	-0.187495	1.65361e-102	3.30722e-99	0.196	0.543	protein disulfide isomerase	protein disulfide isomerase activity
1	34.1921	0.931829	LmjF.27.2370	-0.189137	1.65371e-242	3.30742e-239	0.028	0.115	hypothetical protein, conserved	N/A
1	34.1921	0.931829	LmjF.07.0715	-0.189395	6.38269e-13	1.27654e-09	0.046	0.249	hypothetical protein	N/A
1	34.1921	0.931829	LmjF.31.3105	-0.189402	3.26056e-100	6.52112e-97	0.096	0.436	autophagy protein 10	N/A
1	34.1921	0.931829	LmjF.06.0415	-0.189712	5.44025e-21	1.08805e-17	0.298	0.583	60S ribosomal protein L19, putative	RNA binding;structural constituent of ribosome
1	34.1921	0.931829	LmjF.34.2479	-0.190103	1.8396e-08	3.67919e-05	0.037	0.248	hypothetical protein, conserved	N/A
1	34.1921	0.931829	LmjF.30.0290	-0.19017	1.75906e-280	3.51813e-277	0.088	0.496	hypothetical protein, unknown function	N/A
1	34.1921	0.931829	LmjF.19.0390	-0.190443	4.46901e-37	8.93802e-34	0.458	0.742	40S ribosomal protein S13, putative	structural constituent of ribosome
1	34.1921	0.931829	LmjF.26.2550	-0.190899	1.51685e-32	3.03371e-29	0.075	0.363	hypothetical protein, conserved	N/A
1	34.1921	0.931829	LmjF.20.1110	-0.190937	5.83537e-186	1.16707e-182	0.108	0.493	hypothetical protein, conserved	N/A
1	34.1921	0.931829	LmjF.36.3740	-0.191368	2.60668e-13	5.21336e-10	0.237	0.504	60S ribosomal protein L34, putative	structural constituent of ribosome
1	34.1921	0.931829	LmjF.23.0200	-0.191517	7.72637e-38	1.54527e-34	0.118	0.414	endoribonuclease L-PSP (pb5), putative	N/A
1	34.1921	0.931829	LmjF.06.1280	-0.191859	8.15018e-247	1.63004e-243	0.019	0.108	protoporphyrinogen oxidase-like protein	N/A
1	34.1921	0.931829	LmjF.18.0780	-0.193068	3.64065e-39	7.2813e-36	0.065	0.356	DNA-directed RNA polymerase II/III subunit, putative	DNA binding;DNA-directed 5'-3' RNA polymerase activity
1	34.1921	0.931829	LmjF.32.2690	-0.194028	8.35486e-53	1.67097e-49	0.33	0.646	ribosomal protein L27, putative	structural constituent of ribosome
1	34.1921	0.931829	LmjF.36.4190	-0.194268	5.14547e-180	1.02909e-176	0.077	0.445	GINS complex protein, putative	N/A
1	34.1921	0.931829	LmjF.35.1670	-0.196175	3.82623e-17	7.65245e-14	0.153	0.426	60S ribosomal protein L26, putative	RNA binding;structural constituent of ribosome
1	34.1921	0.931829	LmjF.35.1890	-0.198018	3.76019e-59	7.52038e-56	0.425	0.743	60S ribosomal protein L5, putative	5S rRNA binding;structural constituent of ribosome
1	34.1921	0.931829	LmjF.31.0810	-0.198631	2.63052e-168	5.26105e-165	0.037	0.148	hypothetical protein, conserved	N/A
1	34.1921	0.931829	LmjF.36.5010	-0.19877	7.52144e-37	1.50429e-33	0.701	0.911	40S ribosomal protein SA, putative	structural constituent of ribosome
1	34.1921	0.931829	LmjF.20.0910	-0.199126	3.30382e-116	6.60763e-113	0.035	0.165	hypothetical protein, conserved	N/A
1	34.1921	0.931829	LmjF.23.1050	-0.200069	1.43838e-51	2.87675e-48	0.136	0.439	small hydrophilic endoplasmic reticulum-associated protein (sherp)	N/A
1	34.1921	0.931829	LmjF.23.1610	-0.200083	6.62835e-34	1.32567e-30	0.023	0.208	hypothetical protein, conserved	N/A
1	34.1921	0.931829	LmjF.29.2470	-0.200711	1.46832e-40	2.93664e-37	0.55	0.821	60S ribosomal protein L13, putative	structural constituent of ribosome
1	34.1921	0.931829	LmjF.04.1120	-0.203234	3.67779e-26	7.35557e-23	0.095	0.383	hypothetical protein, conserved	N/A
1	34.1921	0.931829	LmjF.21.1210	-0.20386	1.98131e-34	3.96263e-31	0.07	0.364	thymidine kinase, putative	ATP binding;thymidine kinase activity
1	34.1921	0.931829	LmjF.36.5930	-0.204795	5.82517e-113	1.16503e-109	0.089	0.429	hypothetical protein, conserved	N/A
1	34.1921	0.931829	LmjF.36.0600	-0.206103	1.30265e-06	0.0026053	0.199	0.455	ubiquitin/ribosomal protein S27a, putative	protein binding;structural constituent of ribosome
1	34.1921	0.931829	LmjF.21.1060	-0.206204	5.47473e-50	1.09495e-46	0.22	0.535	40S ribosomal protein S23, putative	structural constituent of ribosome
1	34.1921	0.931829	LmjF.24.1760	-0.206735	4.93169e-99	9.86337e-96	0.032	0.359	hypothetical protein, conserved	N/A
1	34.1921	0.931829	LmjF.32.0880	-0.206952	2.41041e-65	4.82082e-62	0.451	0.776	60S ribosomal protein L18a, putative	structural constituent of ribosome
1	34.1921	0.931829	LmjF.34.2780	-0.207881	4.07295e-49	8.1459e-46	0.339	0.651	40S ribosomal protein S19 protein, putative	structural constituent of ribosome
1	34.1921	0.931829	LmjF.35.0240	-0.208898	1.67776e-26	3.35551e-23	0.306	0.594	60S ribosomal protein L30	RNA binding;structural constituent of ribosome
1	34.1921	0.931829	LmjF.07.0040	-0.210439	0	0	0.042	0.455	hypothetical protein, conserved	N/A
1	34.1921	0.931829	LmjF.36.1250	-0.21055	1.6302e-106	3.2604e-103	0.41	0.768	40S ribosomal protein S9, putative	RNA binding;rRNA binding;structural constituent of ribosome
1	34.1921	0.931829	LmjF.16.0520	-0.21238	2.95182e-16	5.90364e-13	0.092	0.285	hypothetical protein, conserved	N/A
1	34.1921	0.931829	LmjF.04.0620	-0.213237	8.34809e-54	1.66962e-50	0.061	0.226	hypothetical protein	N/A
1	34.1921	0.931829	LmjF.22.0790	-0.213445	2.1424e-17	4.28481e-14	0.053	0.246	translation initiation factor SUI1, putative	RNA binding;translation initiation factor activity
1	34.1921	0.931829	LmjF.35.2630	-0.213897	2.11773e-79	4.23546e-76	0.032	0.185	PHD-like zinc-binding domain containing protein, putative	N/A
1	34.1921	0.931829	LmjF.31.2320	-0.214865	2.82185e-89	5.64371e-86	0.056	0.387	helicase-like protein	ATP binding
1	34.1921	0.931829	LmjF.16.0320	-0.215077	5.59381e-13	1.11876e-09	0.048	0.316	FHA domain containing protein, putative	protein binding
1	34.1921	0.931829	LmjF.25.0720	-0.215586	7.86264e-98	1.57253e-94	0.05	0.19	eukaryotic initiation factor 5a, putative	RNA binding;ribosome binding;translation elongation factor activity
1	34.1921	0.931829	LmjF.36.0990	-0.216541	7.43788e-81	1.48758e-77	0.303	0.643	40S ribosomal protein S10, putative	N/A
1	34.1921	0.931829	LmjF.04.0950	-0.217239	1.12132e-32	2.24264e-29	0.886	0.972	60S ribosomal protein L10, putative	structural constituent of ribosome
1	34.1921	0.931829	LmjF.12.0070	-0.218569	2.39066e-65	4.78133e-62	0.046	0.205	hypothetical protein, conserved	N/A
1	34.1921	0.931829	LmjF.36.1340	-0.220215	3.45678e-44	6.91355e-41	0.056	0.226	N-acetyltransferase subunit Nat1, putative	protein binding
1	34.1921	0.931829	LmjF.30.2690	-0.220609	6.59309e-209	1.31862e-205	0.054	0.429	SH3 domain protein-like protein	protein binding
1	34.1921	0.931829	LmjF.22.1410	-0.221073	2.17616e-05	0.0435231	0.087	0.334	centrin-4, putative	calcium ion binding
1	34.1921	0.931829	LmjF.35.1920	-0.224462	1.81052e-139	3.62104e-136	0.236	0.607	60S ribosomal protein L36, putative	structural constituent of ribosome
1	34.1921	0.931829	LmjF.10.0070	-0.224497	4.2928e-92	8.5856e-89	0.182	0.518	ribosomal protein l35a, putative	structural constituent of ribosome
1	34.1921	0.931829	LmjF.26.0170	-0.225194	6.76181e-09	1.35236e-05	0.167	0.429	60S ribosomal protein L7, putative	structural constituent of ribosome
1	34.1921	0.931829	LmjF.04.0470	-0.225416	1.03629e-111	2.07258e-108	0.248	0.604	60S ribosomal protein L11 (L5, L16)	structural constituent of ribosome
1	34.1921	0.931829	LmjF.18.0300	-0.225469	3.97497e-20	7.94994e-17	0.064	0.338	hypothetical protein, conserved	N/A
1	34.1921	0.931829	LmjF.36.5350	-0.225569	2.33539e-61	4.67078e-58	0.058	0.37	kinetoplastid kinetochore protein 2, putative	ATP binding;protein kinase activity
1	34.1921	0.931829	LmjF.12.0690	-0.226792	1.24496e-27	2.48993e-24	0.046	0.331	hypothetical protein, conserved	N/A
1	34.1921	0.931829	LmjF.31.1570	-0.22687	5.62078e-12	1.12416e-08	0.192	0.46	cytochrome c oxidase VIII (COX VIII), putative	N/A
1	34.1921	0.931829	LmjF.22.0460	-0.229594	9.17078e-37	1.83416e-33	0.728	0.921	40S ribosomal protein S15, putative	RNA binding;structural constituent of ribosome
1	34.1921	0.931829	LmjF.05.0620	-0.229632	1.70196e-43	3.40392e-40	0.06	0.36	hypothetical protein, conserved	protein binding
1	34.1921	0.931829	LmjF.19.1080	-0.229665	1.95163e-236	3.90326e-233	0.02	0.393	hypothetical protein, conserved	N/A
1	34.1921	0.931829	LmjF.21.1720	-0.230999	1.80954e-55	3.61909e-52	0.186	0.497	60S ribosomal protein L32	structural constituent of ribosome
1	34.1921	0.931829	LmjF.28.0390	-0.232931	1.1789e-112	2.3578e-109	0.079	0.428	Nucleus and spindle associated protein 1, putative	N/A
1	34.1921	0.931829	LmjF.31.0560	-0.233569	3.5509e-121	7.10179e-118	0.034	0.167	mevalonate kinase, putative	ATP binding;mevalonate kinase activity
1	34.1921	0.931829	LmjF.35.1650	-0.234812	1.66826e-10	3.33652e-07	0.038	0.247	hypothetical protein, conserved	N/A
1	34.1921	0.931829	LmjF.11.0960	-0.235431	3.32796e-52	6.65591e-49	0.372	0.686	40S ribosomal protein S5	structural constituent of ribosome
1	34.1921	0.931829	LmjF.34.3650	-0.236206	6.64304e-21	1.32861e-17	0.192	0.477	60S ribosomal protein L21, putative	structural constituent of ribosome
1	34.1921	0.931829	LmjF.18.1360	-0.236411	2.7019e-184	5.4038e-181	0.069	0.439	hypothetical protein, conserved	N/A
1	34.1921	0.931829	LmjF.35.4125	-0.238911	2.77662e-145	5.55324e-142	0.089	0.452	hypothetical protein, conserved	N/A
1	34.1921	0.931829	LmjF.31.1370	-0.239489	3.41106e-142	6.82212e-139	0.029	0.152	hypothetical protein, conserved	protein binding
1	34.1921	0.931829	LmjF.30.3200	-0.239894	3.182e-06	0.00636399	0.159	0.417	ribosomal protein S26, putative	structural constituent of ribosome
1	34.1921	0.931829	LmjF.34.1245	-0.240727	4.1734e-253	8.34681e-250	0.015	0.101	hypothetical protein, conserved	N/A
1	34.1921	0.931829	LmjF.32.0680	-0.241631	0	0	0.136	0.581	OSM3-like kinesin, putative	ATP binding;microtubule binding;microtubule motor activity
1	34.1921	0.931829	LmjF.30.0800	-0.241812	2.15367e-44	4.30735e-41	0.04	0.212	rac serine-threonine kinase, putative	ATP binding;protein kinase activity;protein serine/threonine kinase activity
1	34.1921	0.931829	LmjF.36.5120	-0.244632	1.51502e-55	3.03003e-52	0.672	0.899	40S ribosomal protein SA, putative	structural constituent of ribosome
1	34.1921	0.931829	LmjF.33.1630	-0.24583	7.16973e-28	1.43395e-24	0.061	0.244	cyclophilin 4, putative	peptidyl-prolyl cis-trans isomerase activity
1	34.1921	0.931829	LmjF.20.1650	-0.246151	4.95945e-94	9.9189e-91	0.422	0.761	ribosomal protein S11 homolog	structural constituent of ribosome
1	34.1921	0.931829	LmjF.30.0750	-0.246457	6.38113e-13	1.27623e-09	0.086	0.281	4-methyl-5(beta-hydroxyethyl)-thiazole monophosphate synthesis protein, putative	N/A
1	34.1921	0.931829	LmjF.02.0610	-0.2471	5.32763e-13	1.06553e-09	0.037	0.246	hypothetical protein, conserved	N/A
1	34.1921	0.931829	LmjF.36.4420	-0.247187	1.71916e-60	3.43832e-57	0.423	0.746	60S ribosomal protein L22, putative	structural constituent of ribosome
1	34.1921	0.931829	LmjF.35.4130	-0.247976	2.99639e-307	5.99279e-304	0.151	0.584	polyadenylate-binding protein 2	RNA binding;nucleic acid binding
1	34.1921	0.931829	LmjF.08.1100	-0.248794	6.01159e-118	1.20232e-114	0.041	0.172	hypothetical protein, conserved	N/A
1	34.1921	0.931829	LmjF.04.0750	-0.249485	2.84099e-62	5.68198e-59	0.362	0.685	60S ribosomal protein L10, putative	structural constituent of ribosome
1	34.1921	0.931829	LmjF.10.0120	-0.249742	3.19406e-106	6.38812e-103	0.045	0.385	PSP1 C-terminal conserved region, putative	N/A
1	34.1921	0.931829	LmjF.20.1660	-0.249896	5.92336e-187	1.18467e-183	0.033	0.399	hypothetical protein, conserved	N/A
1	34.1921	0.931829	LmjF.27.0680	-0.25052	6.9051e-43	1.38102e-39	0.423	0.715	amino acid permease, putative	N/A
1	34.1921	0.931829	LmjF.06.0580	-0.251348	3.48217e-12	6.96435e-09	0.193	0.463	60S ribosomal protein L23a, putative	structural constituent of ribosome
1	34.1921	0.931829	LmjF.30.3340	-0.251419	1.93433e-25	3.86866e-22	0.362	0.635	60S ribosomal protein L9, putative	rRNA binding;structural constituent of ribosome
1	34.1921	0.931829	LmjF.34.0010	-0.25466	5.88303e-98	1.17661e-94	0.423	0.776	short chain dehydrogenase, putative	N/A
1	34.1921	0.931829	LmjF.28.2560	-0.255248	3.47695e-51	6.9539e-48	0.626	0.879	40S ribosomal protein S17, putative	structural constituent of ribosome
1	34.1921	0.931829	LmjF.32.2960	-0.255968	1.27262e-217	2.54523e-214	0.06	0.438	DNA replication licensing factor MCM7, putative	ATP binding;DNA binding;DNA helicase activity
1	34.1921	0.931829	LmjF.21.1050	-0.25607	3.34588e-108	6.69177e-105	0.428	0.78	60S ribosomal protein L9, putative	rRNA binding;structural constituent of ribosome
1	34.1921	0.931829	LmjF.19.1530	-0.257771	6.89303e-06	0.0137861	0.094	0.355	FK506-binding protein (FKBP)-type peptidyl-prolyl isomerase, putative	peptidyl-prolyl cis-trans isomerase activity;protein binding
1	34.1921	0.931829	LmjF.11.0150	-0.2587	0	0	0.094	0.518	hypothetical protein, conserved	N/A
1	34.1921	0.931829	LmjF.29.2370	-0.26195	1.85057e-60	3.70113e-57	0.063	0.368	60S ribosomal protein L39, putative	structural constituent of ribosome
1	34.1921	0.931829	LmjF.30.3090	-0.263154	1.73111e-15	3.46223e-12	0.192	0.464	RNA-binding protein 42 (RNA-binding motif protein 42), putative	N/A
1	34.1921	0.931829	LmjF.11.0970	-0.265929	5.40315e-73	1.08063e-69	0.497	0.804	40S ribosomal protein S5	structural constituent of ribosome
1	34.1921	0.931829	LmjF.21.0730	-0.265954	2.92528e-13	5.85057e-10	0.102	0.37	60S ribosomal protein L36, putative	structural constituent of ribosome
1	34.1921	0.931829	LmjF.31.3030	-0.267962	1.99861e-80	3.99722e-77	0.04	0.189	hypothetical protein, unknown function	N/A
1	34.1921	0.931829	LmjF.04.0790	-0.268515	2.58838e-168	5.17675e-165	0.055	0.422	hypothetical protein, conserved	N/A
1	34.1921	0.931829	LmjF.32.1990	-0.269146	1.29631e-69	2.59262e-66	0.063	0.38	hypothetical protein, conserved	N/A
1	34.1921	0.931829	LmjF.30.1220	-0.269926	1.12768e-161	2.25536e-158	0.035	0.397	hypothetical protein, unknown function	N/A
1	34.1921	0.931829	LmjF.12.0890	-0.270745	3.4088e-126	6.81759e-123	0.033	0.158	promastigote surface antigen 38S	N/A
1	34.1921	0.931829	LmjF.15.1545	-0.272586	3.01764e-171	6.03529e-168	0.018	0.134	hypothetical protein, conserved	N/A
1	34.1921	0.931829	LmjF.17.0430	-0.274814	2.42032e-81	4.84064e-78	0.082	0.411	hypothetical protein, conserved	N/A
1	34.1921	0.931829	LmjF.12.0240	-0.274974	1.04869e-13	2.09738e-10	0.09	0.363	hypothetical protein, unknown function	N/A
1	34.1921	0.931829	LmjF.05.0580	-0.280078	2.40826e-169	4.81652e-166	0.095	0.474	hypothetical protein, conserved	N/A
1	34.1921	0.931829	LmjF.13.0560	-0.280657	1.25377e-130	2.50755e-127	0.411	0.78	60S ribosomal protein L18, putative	structural constituent of ribosome
1	34.1921	0.931829	LmjF.09.0410	-0.281687	2.71152e-71	5.42304e-68	0.067	0.39	kinetoplastid kinetochore protein 19, putative	ATP binding;protein kinase activity
1	34.1921	0.931829	LmjF.23.1250	-0.284013	1.72326e-49	3.44652e-46	0.067	0.372	Protein of unknown function (DUF3250), putative	N/A
1	34.1921	0.931829	LmjF.21.1820	-0.286007	4.52634e-98	9.05269e-95	0.459	0.808	60S ribosomal protein L37a, putative	structural constituent of ribosome
1	34.1921	0.931829	LmjF.17.0340	-0.288417	8.98407e-12	1.79681e-08	0.033	0.237	hypothetical protein, conserved	N/A
1	34.1921	0.931829	LmjF.09.0100	-0.290408	1.46658e-79	2.93316e-76	0.085	0.416	flagellar pocket cytoskeletal protein bilbo1	calcium ion binding
1	34.1921	0.931829	LmjF.31.0920	-0.292693	1.5383e-37	3.0766e-34	0.07	0.245	sodium stibogluconate resistance protein, putative	N/A
1	34.1921	0.931829	LmjF.10.0660	-0.294695	3.45338e-108	6.90675e-105	0.108	0.461	hypothetical protein, unknown function	N/A
1	34.1921	0.931829	LmjF.36.0230	-0.295547	3.69383e-39	7.38766e-36	0.045	0.223	peptidyl-prolyl cis-trans isomerase, putative	peptidyl-prolyl cis-trans isomerase activity
1	34.1921	0.931829	LmjF.30.3650	-0.295822	2.05482e-16	4.10964e-13	0.806	0.948	ribosomal protein L15, putative	structural constituent of ribosome
1	34.1921	0.931829	LmjF.32.2190	-0.296454	0	0	0.047	0.453	hypothetical protein, unknown function	N/A
1	34.1921	0.931829	LmjF.11.0720	-0.298052	1.92505e-122	3.8501e-119	0.147	0.516	PUF nine target 1	N/A
1	34.1921	0.931829	LmjF.15.0040	-0.298473	6.67912e-183	1.33582e-179	0.095	0.472	Possible lysine decarboxylase, putative	N/A
1	34.1921	0.931829	LmjF.32.2940	-0.29867	2.45334e-77	4.90669e-74	0.051	0.376	hypothetical protein, conserved	N/A
1	34.1921	0.931829	LmjF.36.5845	-0.301215	1.6078e-16	3.21559e-13	0.05	0.326	kinetoplast-associated protein, putative	N/A
1	34.1921	0.931829	LmjF.26.0180	-0.304043	6.50101e-45	1.3002e-41	0.279	0.586	60S ribosomal protein L7, putative	structural constituent of ribosome
1	34.1921	0.931829	LmjF.35.3790	-0.304441	1.62861e-07	0.000325723	0.144	0.405	60S ribosomal protein L23, putative	structural constituent of ribosome
1	34.1921	0.931829	LmjF.35.0380	-0.307808	6.44646e-298	1.28929e-294	0.095	0.512	thioredoxin, putative	N/A
1	34.1921	0.931829	LmjF.28.0590	-0.309215	2.55913e-07	0.000511826	0.058	0.273	hypothetical protein, unknown function	N/A
1	34.1921	0.931829	LmjF.13.1660	-0.310201	6.05838e-78	1.21168e-74	0.16	0.495	chaperonin TCP20, putative	ATP binding;unfolded protein binding
1	34.1921	0.931829	LmjF.26.1330	-0.313112	0	0	0.129	0.589	hypothetical protein, conserved	N/A
1	34.1921	0.931829	LmjF.35.0180	-0.313236	1.57947e-109	3.15893e-106	0.024	0.168	hypothetical protein, conserved	N/A
1	34.1921	0.931829	LmjF.12.1120	-0.315727	6.62168e-63	1.32434e-59	0.082	0.399	Flagellum attachment zone protein 2	N/A
1	34.1921	0.931829	LmjF.35.2010	-0.316519	3.51396e-81	7.02792e-78	0.653	0.896	40S ribosomal protein S6, putative	structural constituent of ribosome
1	34.1921	0.931829	LmjF.25.0920	-0.319043	6.72531e-100	1.34506e-96	0.053	0.389	Histone RNA hairpin-binding protein RNA-binding domain containing protein, putative	RNA binding;mRNA binding
1	34.1921	0.931829	LmjF.06.0430	-0.321389	2.83738e-56	5.67475e-53	0.053	0.223	hypothetical protein, conserved	N/A
1	34.1921	0.931829	LmjF.30.3310	-0.323577	0	0	0.137	0.595	MORN repeat-containing protein 1	N/A
1	34.1921	0.931829	LmjF.26.1610	-0.325232	1.39347e-185	2.78695e-182	0.393	0.808	Proline dehydrogenase, mitochondrial	calcium ion binding;proline dehydrogenase activity
1	34.1921	0.931829	LmjF.04.0580	-0.326173	5.69099e-67	1.1382e-63	0.031	0.188	spermidine synthase	catalytic activity
1	34.1921	0.931829	LmjF.18.1410	-0.3352	2.25712e-293	4.51424e-290	0.083	0.503	hypothetical protein, conserved	N/A
1	34.1921	0.931829	LmjF.35.3800	-0.335648	1.37491e-125	2.74982e-122	0.439	0.791	60S ribosomal protein L23, putative	structural constituent of ribosome
1	34.1921	0.931829	LmjF.29.0970	-0.336764	1.97057e-05	0.0394115	0.053	0.311	kinesin, putative	ATP binding;microtubule binding;microtubule motor activity
1	34.1921	0.931829	LmjF.29.0850	-0.342804	2.81437e-95	5.62875e-92	0.185	0.54	High mobility group protein TDP1	N/A
1	34.1921	0.931829	LmjF.33.0680	-0.34796	5.18648e-43	1.0373e-39	0.054	0.232	sterol C-24 reductase, putative	oxidoreductase activity, acting on the CH-CH group of donors, NAD or NADP as acceptor
1	34.1921	0.931829	LmjF.22.0120	-0.348601	0	0	0.044	0.498	hypothetical protein, conserved	N/A
1	34.1921	0.931829	LmjF.15.1490	-0.348755	2.25822e-58	4.51644e-55	0.11	0.429	hypothetical protein, conserved	N/A
1	34.1921	0.931829	LmjF.22.0660	-0.355175	0	0	0.1	0.567	glucoamylase-like protein	N/A
1	34.1921	0.931829	LmjF.28.0550	-0.355376	4.00627e-18	8.01254e-15	0.072	0.355	DNA repair protein RAD51, putative	ATP binding;DNA binding;DNA-dependent ATPase activity;double-stranded DNA binding;nucleotide binding;recombinase activity;single-stranded DNA binding
1	34.1921	0.931829	LmjF.29.2480	-0.356419	1.77506e-84	3.55012e-81	0.095	0.432	hypothetical protein, conserved	N/A
1	34.1921	0.931829	LmjF.31.2220	-0.358861	2.00015e-224	4.00029e-221	0.053	0.441	hypothetical protein, unknown function	N/A
1	34.1921	0.931829	LmjF.28.2555	-0.364903	1.36852e-113	2.73703e-110	0.546	0.861	40S ribosomal protein S17, putative	structural constituent of ribosome
1	34.1921	0.931829	LmjF.36.3550	-0.374018	1.16376e-34	2.32751e-31	0.037	0.335	hypothetical protein, conserved	N/A
1	34.1921	0.931829	LmjF.22.1670	-0.374334	1.82139e-244	3.64277e-241	0.007	0.101	hypothetical protein, conserved	N/A
1	34.1921	0.931829	LmjF.32.2610	-0.37952	7.03539e-140	1.40708e-136	0.194	0.577	Tip Of Extending FAZ protein 1	N/A
1	34.1921	0.931829	LmjF.10.0870	-0.380398	0	0	0.148	0.596	histone H3	DNA binding;protein heterodimerization activity
1	34.1921	0.931829	LmjF.29.2420	-0.386616	0	0	0.063	0.485	hypothetical protein, conserved	N/A
1	34.1921	0.931829	LmjF.28.0540	-0.388988	1.47625e-214	2.9525e-211	0.215	0.62	ribosomal protein S26, putative	structural constituent of ribosome
1	34.1921	0.931829	LmjF.24.1720	-0.400344	3.15132e-261	6.30264e-258	0.064	0.471	cell division cycle protein 20, putative	anaphase-promoting complex binding;protein binding;ubiquitin-protein transferase activator activity
1	34.1921	0.931829	LmjF.27.0430	-0.415057	2.77295e-242	5.5459e-239	0.078	0.488	hypothetical protein, conserved	N/A
1	34.1921	0.931829	LmjF.36.7000	-0.42098	2.02435e-42	4.0487e-39	0.024	0.207	PSP1 C-terminal conserved region, putative	N/A
1	34.1921	0.931829	LmjF.28.1990	-0.422136	1.21472e-269	2.42944e-266	0.059	0.467	hypothetical protein, conserved	protein binding
1	34.1921	0.931829	LmjF.32.1130	-0.435509	7.43868e-150	1.48774e-146	0.057	0.427	hypothetical protein, conserved	N/A
1	34.1921	0.931829	LmjF.35.2030	-0.436284	4.47015e-151	8.9403e-148	0.062	0.431	hypothetical protein, unknown function	calcium ion binding
1	34.1921	0.931829	LmjF.13.0690	-0.437123	0	0	0.127	0.606	PSP1 C-terminal conserved region, putative	N/A
1	34.1921	0.931829	LmjF.09.1100	-0.450946	2.02705e-232	4.0541e-229	0.068	0.476	hypothetical protein, conserved	N/A
1	34.1921	0.931829	LmjF.24.1400	-0.451934	0	0	0.076	0.524	hypothetical protein, conserved	N/A
1	34.1921	0.931829	LmjF.34.2970	-0.458285	1.16248e-84	2.32496e-81	0.023	0.18	Nucleus and spindle associated protein 4, putative	N/A
1	34.1921	0.931829	LmjF.36.3220	-0.459026	0	0	0.086	0.542	hypothetical protein, conserved	N/A
1	34.1921	0.931829	LmjF.35.1310	-0.462688	2.08132e-10	4.16265e-07	0.109	0.387	histone H4	DNA binding;protein heterodimerization activity
1	34.1921	0.931829	LmjF.21.1220	-0.465987	0	0	0.079	0.539	hypothetical protein, conserved	N/A
1	34.1921	0.931829	LmjF.36.5920	-0.472056	6.95896e-114	1.39179e-110	0.082	0.444	kinetoplast DNA-associated protein, putative	N/A
1	34.1921	0.931829	LmjF.09.0400	-0.480078	6.64859e-282	1.32972e-278	0.118	0.55	kinetoplastid kinetochore protein 10, putative	ATP binding;protein kinase activity
1	34.1921	0.931829	LmjF.35.1100	-0.480731	0	0	0.053	0.48	hypothetical protein, conserved	N/A
1	34.1921	0.931829	LmjF.30.2130	-0.490361	5.75528e-160	1.15106e-156	0.034	0.398	Serine/threonine-protein kinase NEK10, putative	ATP binding;protein kinase activity;zinc ion binding
1	34.1921	0.931829	LmjF.17.0500	-0.492219	3.95755e-87	7.9151e-84	0.029	0.359	hypothetical protein	N/A
1	34.1921	0.931829	LmjF.30.1370	-0.497651	0	0	0.082	0.579	PSP1 C-terminal conserved region, putative	N/A
1	34.1921	0.931829	LmjF.20.1365	-0.504747	0	0	0.041	0.526	pumillio protein 9, putative	RNA binding
1	34.1921	0.931829	LmjF.21.1480	-0.52148	2.54952e-100	5.09904e-97	0.136	0.497	hypothetical protein, conserved	N/A
1	34.1921	0.931829	LmjF.24.0290	-0.52159	6.70131e-226	1.34026e-222	0.041	0.441	NLI interacting factor-like phosphatase, putative	N/A
1	34.1921	0.931829	LmjF.32.3790	-0.533938	2.419e-69	4.83799e-66	0.085	0.426	cyclin-dependent kinase regulatory subunit	cyclin-dependent protein serine/threonine kinase regulator activity
1	34.1921	0.931829	LmjF.27.2270	-0.536515	7.23544e-222	1.44709e-218	0.058	0.462	hypothetical protein, conserved	N/A
1	34.1921	0.931829	LmjF.35.4760	-0.537136	3.64882e-46	7.29763e-43	0.052	0.365	hypothetical protein, conserved	N/A
1	34.1921	0.931829	LmjF.36.1900	-0.543583	3.35476e-123	6.70952e-120	0.05	0.412	kinetoplastid kinetochore protein 1	N/A
1	34.1921	0.931829	LmjF.07.0025	-0.547625	0	0	0.178	0.643	histone-lysine N-methyltransferase, putative	histone methyltransferase activity (H3-K79 specific);histone-lysine N-methyltransferase activity
1	34.1921	0.931829	LmjF.09.0880	-0.557555	0	0	0.089	0.532	histone h1-like protein	N/A
1	34.1921	0.931829	LmjF.06.0830	-0.559581	2.42088e-70	4.84176e-67	0.163	0.498	lipin, putative	N/A
1	34.1921	0.931829	LmjF.34.0250	-0.59726	0	0	0.178	0.695	hypothetical protein, conserved	N/A
1	34.1921	0.931829	LmjF.35.0230	-0.627887	6.54918e-213	1.30984e-209	0.068	0.471	hypothetical protein, conserved	metal ion binding
1	34.1921	0.931829	LmjF.27.1080	-0.647193	0	0	0.169	0.657	hypothetical protein, conserved	protein binding
1	34.1921	0.931829	LmjF.26.2660	-0.652822	6.90992e-31	1.38198e-27	0.045	0.354	Nucleoporin NUP92	N/A
1	34.1921	0.931829	LmjF.36.0550	-0.723753	0	0	0.052	0.548	cdc2-related kinase 3	ATP binding;protein kinase activity
1	34.1921	0.931829	LmjF.32.3320	-0.742293	0	0	0.054	0.539	cyclin 6, putative	N/A
1	34.1921	0.931829	LmjF.20.0030	-0.746199	5.59561e-117	1.11912e-113	0.069	0.435	Histone-lysine N-methyltransferase, H3 lysine-76 specific	histone methyltransferase activity (H3-K79 specific);histone-lysine N-methyltransferase activity
1	34.1921	0.931829	LmjF.26.1340	-0.773129	0	0	0.189	0.688	DNA ligase k alpha, putative	ATP binding;DNA ligase (ATP) activity
1	34.1921	0.931829	LmjF.16.1470	-0.794017	0	0	0.076	0.552	kinesin, putative	ATP binding;microtubule binding;microtubule motor activity
1	34.1921	0.931829	LmjF.16.1420	-0.832562	0	0	0.089	0.589	hypothetical protein, conserved	N/A
2	16.7861	21.947	LmjF.09.0880	1.09551	9.12268e-170	1.82454e-166	0.592	0.4	histone h1-like protein	N/A
2	16.7861	21.947	LmjF.32.3320	0.974789	0	0	0.628	0.39	cyclin 6, putative	N/A
2	16.7861	21.947	LmjF.32.2610	0.946114	0	0	0.779	0.428	Tip Of Extending FAZ protein 1	N/A
2	16.7861	21.947	LmjF.17.0500	0.937622	9.21858e-10	1.84372e-06	0.356	0.272	hypothetical protein	N/A
2	16.7861	21.947	LmjF.29.1770	0.915838	0	0	0.913	0.624	paraflagellar rod protein 1D, putative	calmodulin binding
2	16.7861	21.947	LmjF.35.0230	0.880851	3.96829e-138	7.93658e-135	0.542	0.348	hypothetical protein, conserved	metal ion binding
2	16.7861	21.947	LmjF.29.2480	0.87968	0	0	0.615	0.3	hypothetical protein, conserved	N/A
2	16.7861	21.947	LmjF.36.0550	0.876758	2.83361e-147	5.66723e-144	0.57	0.411	cdc2-related kinase 3	ATP binding;protein kinase activity
2	16.7861	21.947	LmjF.16.1420	0.875938	1.38894e-154	2.77788e-151	0.642	0.444	hypothetical protein, conserved	N/A
2	16.7861	21.947	LmjF.16.1470	0.87081	6.99138e-158	1.39828e-154	0.616	0.411	kinesin, putative	ATP binding;microtubule binding;microtubule motor activity
2	16.7861	21.947	LmjF.10.0185	0.846002	0	0	0.815	0.54	hypothetical protein	N/A
2	16.7861	21.947	LmjF.34.0250	0.806665	0	0	0.789	0.536	hypothetical protein, conserved	N/A
2	16.7861	21.947	LmjF.35.4125	0.732893	3.8646e-108	7.7292e-105	0.525	0.339	hypothetical protein, conserved	N/A
2	16.7861	21.947	LmjF.27.1080	0.714813	2.61029e-195	5.22058e-192	0.73	0.51	hypothetical protein, conserved	protein binding
2	16.7861	21.947	LmjF.06.0830	0.678515	1.15636e-209	2.31271e-206	0.669	0.37	lipin, putative	N/A
2	16.7861	21.947	LmjF.09.0210	0.669327	0	0	0.815	0.564	Domain of unknown function (DUF4586), putative	N/A
2	16.7861	21.947	LmjF.21.1350	0.658634	4.10803e-272	8.21605e-269	0.661	0.436	PB1 domain containing protein, putative	protein binding
2	16.7861	21.947	LmjF.23.0560	0.657661	1.67495e-254	3.3499e-251	0.709	0.479	kinesin-C	ATP binding;microtubule binding;microtubule motor activity
2	16.7861	21.947	LmjF.36.5150	0.631111	5.12882e-105	1.02576e-101	0.609	0.427	kinesin-D	ATP binding;microtubule binding;microtubule motor activity
2	16.7861	21.947	LmjF.21.1480	0.630303	7.75793e-116	1.55159e-112	0.587	0.381	hypothetical protein, conserved	N/A
2	16.7861	21.947	LmjF.11.0720	0.589164	2.00772e-130	4.01544e-127	0.605	0.397	PUF nine target 1	N/A
2	16.7861	21.947	LmjF.36.4230	0.563419	4.53458e-41	9.06916e-38	0.556	0.423	paraflagellar rod component, putative	protein binding
2	16.7861	21.947	LmjF.28.1990	0.561059	2.12097e-125	4.24193e-122	0.518	0.347	hypothetical protein, conserved	protein binding
2	16.7861	21.947	LmjF.24.1560	0.552044	1.15151e-201	2.30302e-198	0.869	0.649	hypothetical protein, conserved	N/A
2	16.7861	21.947	LmjF.26.1340	0.527979	1.31941e-113	2.63882e-110	0.725	0.547	DNA ligase k alpha, putative	ATP binding;DNA ligase (ATP) activity
2	16.7861	21.947	LmjF.30.3310	0.514741	8.76347e-169	1.75269e-165	0.658	0.459	MORN repeat-containing protein 1	N/A
2	16.7861	21.947	LmjF.30.1220	0.499753	3.08645e-24	6.17291e-21	0.395	0.302	hypothetical protein, unknown function	N/A
2	16.7861	21.947	LmjF.29.1170	0.497509	5.31405e-179	1.06281e-175	0.762	0.547	hypothetical protein, conserved	calcium ion binding
2	16.7861	21.947	LmjF.30.3700	0.495568	3.44031e-260	6.88061e-257	0.532	0.317	hypothetical protein, conserved	N/A
2	16.7861	21.947	LmjF.20.0030	0.494546	2.57271e-85	5.14541e-82	0.488	0.325	Histone-lysine N-methyltransferase, H3 lysine-76 specific	histone methyltransferase activity (H3-K79 specific);histone-lysine N-methyltransferase activity
2	16.7861	21.947	LmjF.31.1680	0.489565	2.84654e-185	5.69309e-182	0.533	0.259	hypothetical protein, conserved	N/A
2	16.7861	21.947	LmjF.10.0660	0.484778	8.67631e-156	1.73526e-152	0.572	0.342	hypothetical protein, unknown function	N/A
2	16.7861	21.947	LmjF.07.0310	0.483143	4.63356e-167	9.26713e-164	0.672	0.472	paraflagellar rod protein, putative	calmodulin binding
2	16.7861	21.947	LmjF.09.0400	0.482449	2.60894e-103	5.21788e-100	0.601	0.424	kinetoplastid kinetochore protein 10, putative	ATP binding;protein kinase activity
2	16.7861	21.947	LmjF.11.0810	0.471785	1.76824e-167	3.53649e-164	0.638	0.447	hypothetical protein, conserved	calcium ion binding
2	16.7861	21.947	LmjF.18.1640	0.466515	1.43376e-130	2.86751e-127	0.672	0.41	hypothetical protein, conserved	N/A
2	16.7861	21.947	LmjF.07.0025	0.46143	3.65453e-146	7.30906e-143	0.715	0.503	histone-lysine N-methyltransferase, putative	histone methyltransferase activity (H3-K79 specific);histone-lysine N-methyltransferase activity
2	16.7861	21.947	LmjF.26.2250	0.458777	5.40961e-205	1.08192e-201	0.63	0.414	hypothetical protein, conserved	N/A
2	16.7861	21.947	LmjF.16.1425	0.457167	2.59126e-156	5.18252e-153	0.774	0.511	Paraflagellar rod protein 2-3	calmodulin binding
2	16.7861	21.947	LmjF.21.1220	0.438704	7.1073e-103	1.42146e-99	0.563	0.412	hypothetical protein, conserved	N/A
2	16.7861	21.947	LmjF.19.0520	0.434795	8.76034e-139	1.75207e-135	0.602	0.326	hypothetical protein, conserved	N/A
2	16.7861	21.947	LmjF.24.1720	0.429218	8.65497e-86	1.73099e-82	0.507	0.355	cell division cycle protein 20, putative	anaphase-promoting complex binding;protein binding;ubiquitin-protein transferase activator activity
2	16.7861	21.947	LmjF.31.3105	0.42848	3.77315e-229	7.54631e-226	0.561	0.316	autophagy protein 10	N/A
2	16.7861	21.947	LmjF.35.4800	0.407275	2.61816e-135	5.23633e-132	0.53	0.306	AMP deaminase, putative	AMP deaminase activity;deaminase activity
2	16.7861	21.947	LmjF.32.0680	0.401865	5.41653e-167	1.08331e-163	0.628	0.452	OSM3-like kinesin, putative	ATP binding;microtubule binding;microtubule motor activity
2	16.7861	21.947	LmjF.20.1365	0.401359	2.57039e-46	5.14078e-43	0.511	0.401	pumillio protein 9, putative	RNA binding
2	16.7861	21.947	LmjF.05.0350	0.383899	2.49413e-77	4.98827e-74	0.473	0.258	trypanothione reductase	disulfide oxidoreductase activity;flavin adenine dinucleotide binding;oxidoreductase activity;oxidoreductase activity, acting on a sulfur group of donors, NAD(P) as acceptor
2	16.7861	21.947	LmjF.36.2120	0.38226	1.07466e-265	2.14933e-262	0.489	0.236	hypothetical protein, conserved	N/A
2	16.7861	21.947	LmjF.32.2190	0.380044	3.02659e-30	6.05318e-27	0.437	0.348	hypothetical protein, unknown function	N/A
2	16.7861	21.947	LmjF.35.5340	0.376318	1.178e-23	2.356e-20	0.39	0.245	Dynein heavy chain and region D6 of dynein motor/Ankyrin repeats (3 copies), putative	protein binding
2	16.7861	21.947	LmjF.33.0610	0.376139	8.61458e-67	1.72292e-63	0.45	0.228	paraflagellar rod component, putative	N/A
2	16.7861	21.947	LmjF.23.0080	0.374401	4.35391e-193	8.70781e-190	0.611	0.327	hypothetical protein, conserved	N/A
2	16.7861	21.947	LmjF.32.0350	0.373723	9.21295e-115	1.84259e-111	0.629	0.441	hypothetical protein, conserved	N/A
2	16.7861	21.947	LmjF.02.0310	0.370981	1.35091e-182	2.70181e-179	0.613	0.442	Soluble NSF attachment protein, SNAP, putative	protein binding
2	16.7861	21.947	LmjF.29.1040	0.37054	4.25294e-162	8.50587e-159	0.589	0.396	Flagellar Member 6	N/A
2	16.7861	21.947	LmjF.34.3040	0.360783	2.70207e-138	5.40413e-135	0.677	0.48	hypothetical protein, conserved	N/A
2	16.7861	21.947	LmjF.23.0990	0.35762	8.60453e-89	1.72091e-85	0.658	0.463	hypothetical protein, conserved	N/A
2	16.7861	21.947	LmjF.36.5970	0.356294	9.9073e-119	1.98146e-115	0.578	0.402	Flagellum attachment zone protein 5	N/A
2	16.7861	21.947	LmjF.36.5290	0.350563	1.09348e-130	2.18696e-127	0.406	0.219	hypothetical protein, conserved	N/A
2	16.7861	21.947	LmjF.09.1100	0.342345	4.27594e-160	8.55188e-157	0.553	0.35	hypothetical protein, conserved	N/A
2	16.7861	21.947	LmjF.19.0140	0.338507	4.89988e-147	9.79976e-144	0.592	0.379	Associated kinase of Tb14-3-3, putative	ATP binding;protein kinase activity
2	16.7861	21.947	LmjF.32.1680	0.335419	9.40358e-115	1.88072e-111	0.531	0.303	Paraflagellar Rod Proteome Component 9, putative	N/A
2	16.7861	21.947	LmjF.35.3925	0.334995	9.15055e-172	1.83011e-168	0.572	0.386	hypothetical protein, conserved	N/A
2	16.7861	21.947	LmjF.26.1610	0.333041	1.07588e-109	2.15177e-106	0.871	0.683	Proline dehydrogenase, mitochondrial	calcium ion binding;proline dehydrogenase activity
2	16.7861	21.947	LmjF.21.0380	0.332648	1.96712e-70	3.93423e-67	0.539	0.386	Protein of unknown function (DUF667), putative	N/A
2	16.7861	21.947	LmjF.29.2420	0.332309	5.16305e-116	1.03261e-112	0.518	0.365	hypothetical protein, conserved	N/A
2	16.7861	21.947	LmjF.17.1380	0.331908	3.12769e-45	6.25539e-42	0.311	0.172	hypothetical protein, conserved	protein binding
2	16.7861	21.947	LmjF.24.1950	0.329023	8.80597e-133	1.76119e-129	0.619	0.434	hypothetical protein, conserved	N/A
2	16.7861	21.947	LmjF.36.6380	0.328554	4.71005e-90	9.42009e-87	0.591	0.437	rib72 protein-like protein	calcium ion binding
2	16.7861	21.947	LmjF.09.0410	0.322435	1.55757e-59	3.11513e-56	0.436	0.294	kinetoplastid kinetochore protein 19, putative	ATP binding;protein kinase activity
2	16.7861	21.947	LmjF.25.2200	0.32237	6.18647e-14	1.23729e-10	0.394	0.284	parkin co-regulated protein, putative	N/A
2	16.7861	21.947	LmjF.21.0570	0.3201	4.63847e-173	9.27695e-170	0.592	0.412	hypothetical protein, conserved	N/A
2	16.7861	21.947	LmjF.35.0570	0.317914	5.78131e-73	1.15626e-69	0.515	0.354	hypothetical protein, conserved	protein binding
2	16.7861	21.947	LmjF.26.2660	0.316399	8.55928e-07	0.00171186	0.356	0.271	Nucleoporin NUP92	N/A
2	16.7861	21.947	LmjF.09.0870	0.313203	1.23045e-09	2.46091e-06	0.374	0.289	hypothetical protein, conserved	N/A
2	16.7861	21.947	LmjF.15.0260	0.312754	3.53193e-150	7.06386e-147	0.485	0.272	hypothetical protein, conserved	N/A
2	16.7861	21.947	LmjF.32.2900	0.31228	1.54722e-169	3.09444e-166	0.557	0.376	outer dynein arm docking complex, putative	N/A
2	16.7861	21.947	LmjF.34.2820	0.310268	2.10089e-74	4.20178e-71	0.54	0.352	regulatory subunit of protein kinase a-like protein	N/A
2	16.7861	21.947	LmjF.19.0080	0.2968	1.78419e-162	3.56838e-159	0.526	0.276	DnaJ domain containing protein, putative	N/A
2	16.7861	21.947	LmjF.09.0910	0.292935	1.06527e-61	2.13054e-58	0.556	0.338	calmodulin, putative	calcium ion binding
2	16.7861	21.947	LmjF.10.0620	0.291209	8.17531e-137	1.63506e-133	0.632	0.47	FLA1-binding protein	N/A
2	16.7861	21.947	LmjF.27.1730	0.277943	2.80992e-92	5.61984e-89	0.699	0.504	Flabarin, putative	N/A
2	16.7861	21.947	LmjF.24.1120	0.276364	2.95495e-28	5.9099e-25	0.328	0.203	hypothetical protein, conserved	N/A
2	16.7861	21.947	LmjF.32.0360	0.276243	1.84917e-05	0.0369835	0.403	0.301	hypothetical protein, conserved	N/A
2	16.7861	21.947	LmjF.15.0940	0.276049	7.11549e-95	1.4231e-91	0.482	0.306	Nucleus and spindle associated protein 2, putative	N/A
2	16.7861	21.947	LmjF.24.1400	0.273938	7.07344e-38	1.41469e-34	0.52	0.406	hypothetical protein, conserved	N/A
2	16.7861	21.947	LmjF.36.2400	0.27306	5.07224e-23	1.01445e-19	0.461	0.343	hypothetical protein, conserved	calcium ion binding
2	16.7861	21.947	LmjF.30.2850	0.272514	1.08508e-10	2.17016e-07	0.506	0.416	hypothetical protein, conserved	N/A
2	16.7861	21.947	LmjF.18.1410	0.254382	1.92081e-18	3.84161e-15	0.487	0.395	hypothetical protein, conserved	N/A
2	16.7861	21.947	LmjF.20.1660	0.253787	5.05539e-73	1.01108e-69	0.428	0.295	hypothetical protein, conserved	N/A
2	16.7861	21.947	LmjF.02.0590	0.253236	5.88669e-135	1.17734e-131	0.428	0.25	TPR repeat/Tetratricopeptide repeat, putative	protein binding
2	16.7861	21.947	LmjF.09.0530	0.252547	2.01859e-31	4.03718e-28	0.438	0.322	leucine-rich repeat protein, putative	N/A
2	16.7861	21.947	LmjF.27.0140	0.250536	2.85139e-48	5.70277e-45	0.441	0.316	hypothetical protein, conserved	N/A
2	16.7861	21.947	LmjF.16.0940	0.249786	2.19426e-38	4.38853e-35	0.42	0.298	dynein light chain, putative	N/A
2	16.7861	21.947	LmjF.34.2970	0.248136	1.10687e-08	2.21373e-05	0.225	0.128	Nucleus and spindle associated protein 4, putative	N/A
2	16.7861	21.947	LmjF.29.1750	0.244153	1.24002e-76	2.48003e-73	0.727	0.551	paraflagellar rod protein 1D, putative	calmodulin binding
2	16.7861	21.947	LmjF.35.0060	0.241373	6.88264e-28	1.37653e-24	0.398	0.276	hypothetical protein, conserved	N/A
2	16.7861	21.947	LmjF.01.0030	0.240553	1.7807e-32	3.56141e-29	0.504	0.405	Kinesin-13 1, putative	ATP binding;microtubule binding;microtubule motor activity
2	16.7861	21.947	LmjF.32.1640	0.239592	7.26224e-52	1.45245e-48	0.406	0.286	chromosomal passenger complex 2	N/A
2	16.7861	21.947	LmjF.23.0550	0.239235	9.23585e-66	1.84717e-62	0.447	0.273	ubiquitin-activating enzyme E1, putative	ubiquitin-like modifier activating enzyme activity
2	16.7861	21.947	LmjF.34.1070	0.236889	1.15645e-84	2.31291e-81	0.432	0.268	Lipase (class 3), putative	N/A
2	16.7861	21.947	LmjF.35.1470	0.23579	8.7049e-87	1.74098e-83	0.705	0.516	choline/ethanolamine kinase, putative	N/A
2	16.7861	21.947	LmjF.24.1030	0.235191	8.70603e-79	1.74121e-75	0.573	0.415	dynein light chain, putative	protein binding
2	16.7861	21.947	LmjF.05.1070	0.233936	7.04487e-121	1.40897e-117	0.387	0.205	Legume-like lectin family, putative	N/A
2	16.7861	21.947	LmjF.17.0260	0.233405	1.32254e-15	2.64507e-12	0.579	0.48	hypothetical protein, conserved	N/A
2	16.7861	21.947	LmjF.34.3390	0.23192	4.91845e-24	9.8369e-21	0.428	0.315	hypothetical protein, conserved	N/A
2	16.7861	21.947	LmjF.26.1330	0.227332	6.22308e-47	1.24462e-43	0.6	0.464	hypothetical protein, conserved	N/A
2	16.7861	21.947	LmjF.34.4600	0.224486	2.33577e-72	4.67153e-69	0.399	0.215	1,2-Dihydroxy-3-keto-5-methylthiopentene dioxygenase, putative	acireductone dioxygenase [iron(II)-requiring] activity
2	16.7861	21.947	LmjF.17.0870	0.223332	1.33017e-74	2.66035e-71	0.553	0.329	META domain containing protein	N/A
2	16.7861	21.947	LmjF.02.0530	0.2218	5.33768e-92	1.06754e-88	0.641	0.487	hypothetical protein, conserved	N/A
2	16.7861	21.947	LmjF.27.2305	0.22149	3.06377e-157	6.12753e-154	0.443	0.236	MORN repeat, putative	N/A
2	16.7861	21.947	LmjF.25.0320	0.220217	5.48118e-165	1.09624e-161	0.602	0.404	B9 domain-containing protein 2	N/A
2	16.7861	21.947	LmjF.27.1870	0.218296	3.43337e-110	6.86673e-107	0.645	0.441	trypanothione synthetase	N/A
2	16.7861	21.947	LmjF.36.1680	0.216954	1.02169e-57	2.04338e-54	0.492	0.333	hypothetical protein, conserved	N/A
2	16.7861	21.947	LmjF.20.0640	0.214274	1.27455e-129	2.5491e-126	0.476	0.265	kinesin heavy chain, putative	ATP binding;microtubule binding;microtubule motor activity
2	16.7861	21.947	LmjF.27.2450	0.209869	4.2153e-91	8.4306e-88	0.54	0.404	hypothetical protein, conserved	N/A
2	16.7861	21.947	LmjF.29.0270	0.205875	3.50918e-117	7.01837e-114	0.505	0.372	hypothetical protein, conserved	N/A
2	16.7861	21.947	LmjF.36.4150	0.204334	2.95933e-87	5.91866e-84	0.634	0.479	hypothetical protein, conserved	N/A
2	16.7861	21.947	LmjF.26.1770	0.203495	2.671e-33	5.342e-30	0.434	0.319	hypothetical protein, conserved	N/A
2	16.7861	21.947	LmjF.35.0460	0.202597	1.86756e-122	3.73512e-119	0.557	0.425	Generative cell specific 1 protein, putative	N/A
2	16.7861	21.947	LmjF.02.0550	0.198558	3.73278e-57	7.46555e-54	0.788	0.612	hypothetical protein, unknown function	N/A
2	16.7861	21.947	LmjF.06.0130	0.19825	3.40553e-14	6.81106e-11	0.298	0.199	conserved hypothetical protein, putative	N/A
2	16.7861	21.947	LmjF.35.5070	0.196374	7.23615e-181	1.44723e-177	0.582	0.392	hypothetical protein, conserved	N/A
2	16.7861	21.947	LmjF.16.0590	0.195583	1.84172e-216	3.68345e-213	0.48	0.216	carbamoyl-phosphate synthase, putative	ATP binding;argininosuccinate synthase activity;carbamoyl-phosphate synthase (glutamine-hydrolyzing) activity;metal ion binding
2	16.7861	21.947	LmjF.36.4780	0.195346	3.04463e-21	6.08926e-18	0.392	0.234	paraflagellar rod component, putative	N/A
2	16.7861	21.947	LmjF.30.2200	0.192626	8.58818e-97	1.71764e-93	0.706	0.55	Zinc finger C-x8-C-x5-C-x3-H type (and similar), putative	metal ion binding
2	16.7861	21.947	LmjF.10.1190	0.19194	1.92822e-14	3.85645e-11	0.331	0.323	flagellar protofilament ribbon protein-like protein	N/A
2	16.7861	21.947	LmjF.31.2905	0.190988	4.86066e-09	9.72132e-06	0.327	0.238	hypothetical protein, conserved	N/A
2	16.7861	21.947	LmjF.29.0090	0.190772	1.3015e-14	2.60301e-11	0.378	0.295	intraflagellar transport protein 27	GTP binding;GTPase activity
2	16.7861	21.947	LmjF.17.0350	0.189789	2.39957e-25	4.79914e-22	0.431	0.319	dihydrouridine synthase (Dus), putative	catalytic activity;flavin adenine dinucleotide binding;tRNA dihydrouridine synthase activity
2	16.7861	21.947	LmjF.12.1120	0.189248	8.74675e-08	0.000174935	0.397	0.315	Flagellum attachment zone protein 2	N/A
2	16.7861	21.947	LmjF.22.1150	0.189202	1.24861e-21	2.49722e-18	0.218	0.104	Protein kinase domain containing protein, putative	ATP binding;protein kinase activity
2	16.7861	21.947	LmjF.35.4045	0.188497	1.64135e-18	3.2827e-15	0.419	0.325	hypothetical protein, conserved	N/A
2	16.7861	21.947	LmjF.28.0950	0.188484	2.39792e-20	4.79585e-17	0.447	0.345	Tctex-1 family, putative	N/A
2	16.7861	21.947	LmjF.31.2320	0.187713	5.68556e-18	1.13711e-14	0.391	0.298	helicase-like protein	ATP binding
2	16.7861	21.947	LmjF.05.0600	0.185884	7.00779e-74	1.40156e-70	0.28	0.123	COG4 transport protein, putative	N/A
2	16.7861	21.947	LmjF.31.2750	0.185795	4.21829e-33	8.43658e-30	0.359	0.236	kinetoplastid kinetochore protein 8, putative	N/A
2	16.7861	21.947	LmjF.19.1080	0.184927	8.1818e-103	1.63636e-99	0.428	0.285	hypothetical protein, conserved	N/A
2	16.7861	21.947	LmjF.36.0560	0.184641	1.34622e-117	2.69245e-114	0.389	0.212	hypothetical protein, conserved	N/A
2	16.7861	21.947	LmjF.36.5110	0.184367	7.07811e-07	0.00141562	0.275	0.258	Domain of unknown function (DUF4496), putative	N/A
2	16.7861	21.947	LmjF.33.3180	0.181815	2.64606e-52	5.29213e-49	0.451	0.315	hypothetical protein, conserved	N/A
2	16.7861	21.947	LmjF.23.0570	0.180698	1.13058e-119	2.26115e-116	0.51	0.298	MYCBP-associated protein family, putative	N/A
2	16.7861	21.947	LmjF.29.2390	0.178628	2.60289e-53	5.20579e-50	0.527	0.375	kinesin, putative	ATP binding;microtubule binding;microtubule motor activity
2	16.7861	21.947	LmjF.18.1010	0.178627	4.37775e-26	8.75551e-23	0.376	0.254	Outer arm dynein light chain 7	N/A
2	16.7861	21.947	LmjF.19.0340	0.177649	4.85088e-76	9.70177e-73	0.639	0.477	hypothetical protein, conserved	N/A
2	16.7861	21.947	LmjF.35.1830	0.177529	2.33758e-144	4.67516e-141	0.61	0.425	hypothetical protein, conserved	N/A
2	16.7861	21.947	LmjF.21.1640	0.176472	3.18547e-14	6.37093e-11	0.2	0.117	hypothetical protein, conserved	N/A
2	16.7861	21.947	LmjF.07.0715	0.17627	2.11499e-21	4.22999e-18	0.202	0.206	hypothetical protein	N/A
2	16.7861	21.947	LmjF.15.0660	0.174839	9.6308e-29	1.92616e-25	0.339	0.203	hypothetical protein, conserved	N/A
2	16.7861	21.947	LmjF.25.0260	0.174177	2.80504e-08	5.61007e-05	0.33	0.254	Dynein light chain 1, cytoplasmic, putative	N/A
2	16.7861	21.947	LmjF.30.1205	0.174032	2.11011e-107	4.22022e-104	0.508	0.322	small nuclear ribonucleoprotein polypeptide e, putative	N/A
2	16.7861	21.947	LmjF.36.0320	0.172108	2.97365e-76	5.9473e-73	0.579	0.437	proteasome subunit beta type-2, putative	threonine-type endopeptidase activity
2	16.7861	21.947	LmjF.04.0460	0.171342	1.87974e-18	3.75949e-15	0.243	0.131	adenylosuccinate lyase, putative	N6-(1,2-dicarboxyethyl)AMP AMP-lyase (fumarate-forming) activity;catalytic activity
2	16.7861	21.947	LmjF.33.1720	0.170906	7.2996e-18	1.45992e-14	0.328	0.208	Tetratricopeptide repeat, putative	protein binding
2	16.7861	21.947	LmjF.36.6590	0.169929	2.94777e-63	5.89554e-60	0.542	0.39	Sperm tail/Sperm tail C-terminal domain containing protein, putative	N/A
2	16.7861	21.947	LmjF.30.0030	0.167072	2.51593e-228	5.03186e-225	0.514	0.3	hypothetical protein, conserved	N/A
2	16.7861	21.947	LmjF.07.0030	0.166438	7.99148e-16	1.5983e-12	0.397	0.268	hypothetical protein, conserved	N/A
2	16.7861	21.947	LmjF.23.0850	0.166131	6.50135e-19	1.30027e-15	0.314	0.213	hypothetical protein, conserved	N/A
2	16.7861	21.947	LmjF.17.0180	0.166109	5.88887e-69	1.17777e-65	0.538	0.369	receptor-type adenylate cyclase b	N/A
2	16.7861	21.947	LmjF.28.0390	0.165877	3.34606e-25	6.69212e-22	0.438	0.332	Nucleus and spindle associated protein 1, putative	N/A
2	16.7861	21.947	LmjF.06.1050	0.164621	2.27244e-79	4.54488e-76	0.634	0.43	protein disulfide isomerase	protein disulfide isomerase activity
2	16.7861	21.947	LmjF.34.2180	0.162807	5.46191e-102	1.09238e-98	0.566	0.41	hypothetical protein, conserved	N/A
2	16.7861	21.947	LmjF.07.0920	0.162526	1.21699e-23	2.43397e-20	0.329	0.205	Protein of unknown function (DUF3608), putative	GTPase activator activity
2	16.7861	21.947	LmjF.25.0930	0.161868	1.07654e-27	2.15307e-24	0.411	0.305	Ankyrin repeats (many copies), putative	protein binding
2	16.7861	21.947	LmjF.16.0100	0.16076	1.92428e-148	3.84856e-145	0.402	0.204	MORN repeat, putative	N/A
2	16.7861	21.947	LmjF.27.1850	0.159217	2.7705e-06	0.005541	0.191	0.135	paraflagellar rod protein 5, putative	calmodulin binding;protein binding
2	16.7861	21.947	LmjF.34.1310	0.15888	8.85112e-46	1.77022e-42	0.534	0.398	hypothetical protein, conserved	N/A
2	16.7861	21.947	LmjF.26.2460	0.158473	3.39672e-239	6.79343e-236	0.405	0.162	hypothetical protein, conserved	N/A
2	16.7861	21.947	LmjF.02.0450	0.158152	4.86268e-93	9.72537e-90	0.599	0.388	voltage-dependent anion-selective channel, putative	voltage-gated anion channel activity
2	16.7861	21.947	LmjF.31.3170	0.157046	7.47636e-27	1.49527e-23	0.432	0.301	major facilitator superfamily, putative	transmembrane transporter activity
2	16.7861	21.947	LmjF.20.1110	0.156558	4.65336e-50	9.30672e-47	0.518	0.384	hypothetical protein, conserved	N/A
2	16.7861	21.947	LmjF.09.0100	0.152954	1.79716e-92	3.59433e-89	0.48	0.313	flagellar pocket cytoskeletal protein bilbo1	calcium ion binding
2	16.7861	21.947	LmjF.18.0890	0.152199	5.29624e-58	1.05925e-54	0.541	0.38	rab7 GTP binding protein, putative	GTP binding;GTPase activity
2	16.7861	21.947	LmjF.17.1440	0.150171	1.54926e-17	3.09853e-14	0.238	0.237	ion transport protein, putative	ion channel activity
2	16.7861	21.947	LmjF.32.0290	0.149433	2.34541e-99	4.69082e-96	0.537	0.411	hypothetical protein, conserved	N/A
2	16.7861	21.947	LmjF.31.2870	0.147107	7.35079e-119	1.47016e-115	0.652	0.458	hypothetical protein, conserved	N/A
2	16.7861	21.947	LmjF.35.3960	0.146764	1.22447e-98	2.44894e-95	0.503	0.369	cAMP-dependent protein kinase catalytic subunit 2	ATP binding;protein kinase activity;protein serine/threonine kinase activity
2	16.7861	21.947	LmjF.29.1460	0.146141	4.9379e-84	9.8758e-81	0.62	0.465	hypothetical protein, conserved	N/A
2	16.7861	21.947	LmjF.31.1270	0.142554	4.20805e-114	8.41609e-111	0.624	0.427	p-glycoprotein e	ATP binding;ATPase activity;ATPase-coupled transmembrane transporter activity
2	16.7861	21.947	LmjF.26.1010	0.142332	4.83561e-35	9.67122e-32	0.232	0.112	hypothetical protein, conserved	N/A
2	16.7861	21.947	LmjF.36.3260	0.141769	4.04745e-114	8.0949e-111	0.363	0.192	hypothetical protein, conserved	rRNA binding;structural constituent of ribosome
2	16.7861	21.947	LmjF.16.1280	0.141295	9.67696e-97	1.93539e-93	0.639	0.502	hypothetical protein, conserved	N/A
2	16.7861	21.947	LmjF.34.1370	0.140335	3.67711e-11	7.35423e-08	0.135	0.101	hypothetical protein, conserved	N/A
2	16.7861	21.947	LmjF.20.1100	0.140285	6.56133e-83	1.31227e-79	0.415	0.243	MORN repeat-containing protein	N/A
2	16.7861	21.947	LmjF.35.2770	0.140121	5.38356e-46	1.07671e-42	0.592	0.449	hypothetical protein, conserved	protein binding
2	16.7861	21.947	LmjF.18.0730	0.139665	1.67452e-133	3.34904e-130	0.445	0.265	dynein light chain Tctex-type, putative	N/A
2	16.7861	21.947	LmjF.35.3370	0.138502	3.56315e-71	7.1263e-68	0.51	0.359	hypothetical protein, conserved	N/A
2	16.7861	21.947	LmjF.07.1055	0.137822	1.36321e-13	2.72642e-10	0.26	0.249	Dpy-30 motif containing protein, putative	N/A
2	16.7861	21.947	LmjF.15.0540	0.137385	1.1259e-06	0.00225179	0.287	0.183	hypothetical protein, conserved	N/A
2	16.7861	21.947	LmjF.32.3870	0.137224	2.50988e-153	5.01977e-150	0.556	0.359	myosin XXI, putative	ATP binding;motor activity;protein binding
2	16.7861	21.947	LmjF.36.1910	0.136802	1.56129e-07	0.000312259	0.412	0.331	T-lymphocyte triggering factor, putative	microtubule binding
2	16.7861	21.947	LmjF.24.1290	0.136212	6.72151e-46	1.3443e-42	0.479	0.362	WASH complex subunit 7, N-terminal/WASH complex subunit 7/WASH complex subunit 7, C-terminal, putative	N/A
2	16.7861	21.947	LmjF.17.0120	0.135329	6.6616e-118	1.33232e-114	0.571	0.365	hypothetical protein, conserved	protein binding
2	16.7861	21.947	LmjF.31.1430	0.135184	2.79768e-102	5.59537e-99	0.514	0.309	pentamidine resistance protein 1	ATP binding;ATPase activity;ATPase-coupled transmembrane transporter activity
2	16.7861	21.947	LmjF.19.1350	0.134769	4.36639e-99	8.73278e-96	0.496	0.32	phosphatidic acid phosphatase protein-like protein	phosphatidate phosphatase activity
2	16.7861	21.947	LmjF.33.0700	0.13222	1.46418e-155	2.92837e-152	0.522	0.375	hypothetical protein, conserved	Hsp90 protein binding;protein binding
2	16.7861	21.947	LmjF.31.0810	0.132191	9.61812e-08	0.000192362	0.197	0.108	hypothetical protein, conserved	N/A
2	16.7861	21.947	LmjF.19.1005	0.132023	3.11819e-49	6.23638e-46	0.517	0.379	4-coumarate:coa ligase-like protein	N/A
2	16.7861	21.947	LmjF.19.0960	0.131917	6.38425e-36	1.27685e-32	0.405	0.283	dynein light chain, putative	N/A
2	16.7861	21.947	LmjF.36.0960	0.131288	1.82805e-121	3.6561e-118	0.619	0.476	hypothetical protein, unknown function	N/A
2	16.7861	21.947	LmjF.25.0440	0.130817	6.31267e-100	1.26253e-96	0.504	0.339	transcription factor IIIb, putative	TBP-class protein binding
2	16.7861	21.947	LmjF.30.2130	0.130629	3.16529e-22	6.33059e-19	0.388	0.304	Serine/threonine-protein kinase NEK10, putative	ATP binding;protein kinase activity;zinc ion binding
2	16.7861	21.947	LmjF.32.1990	0.130098	9.16758e-09	1.83352e-05	0.375	0.297	hypothetical protein, conserved	N/A
2	16.7861	21.947	LmjF.31.1770	0.12993	7.80439e-80	1.56088e-76	0.606	0.445	hypothetical protein, unknown function	N/A
2	16.7861	21.947	LmjF.19.0980	0.12953	2.9855e-99	5.971e-96	0.677	0.488	FYVE zinc finger, putative	metal ion binding
2	16.7861	21.947	LmjF.21.0855	0.129472	2.48098e-131	4.96195e-128	0.436	0.249	hypothetical protein, conserved	chaperone binding
2	16.7861	21.947	LmjF.31.2380	0.128971	5.29879e-87	1.05976e-83	0.669	0.514	hypothetical protein, unknown function	N/A
2	16.7861	21.947	LmjF.24.2010	0.126927	3.42496e-24	6.84993e-21	0.345	0.228	phosphatidylinositol 3-kinase, putative	1-phosphatidylinositol-3-kinase activity;kinase activity
2	16.7861	21.947	LmjF.07.1040	0.126917	6.54308e-67	1.30862e-63	0.527	0.376	hypothetical protein, conserved	protein binding
2	16.7861	21.947	LmjF.23.0600	0.126664	2.39635e-44	4.79269e-41	0.309	0.171	hypothetical protein, conserved	N/A
2	16.7861	21.947	LmjF.08.0840	0.125689	5.91637e-122	1.18327e-118	0.513	0.305	amastin-like protein	N/A
2	16.7861	21.947	LmjF.16.0340	0.125627	1.19663e-47	2.39326e-44	0.581	0.449	3-Beta-hydroxysteroid-delta(8), delta(7)-isomerase, putative	cholestenol delta-isomerase activity
2	16.7861	21.947	LmjF.29.0300	0.125402	5.47263e-49	1.09453e-45	0.4	0.266	hypothetical protein, conserved	protein binding
2	16.7861	21.947	LmjF.34.1150	0.123982	6.64241e-44	1.32848e-40	0.244	0.125	hypothetical protein, conserved	N/A
2	16.7861	21.947	LmjF.36.2800	0.123811	4.41885e-124	8.83771e-121	0.476	0.324	hypothetical protein, conserved	N/A
2	16.7861	21.947	LmjF.33.2610	0.123386	2.0617e-82	4.12339e-79	0.557	0.412	Mitochondrial-processing peptidase subunit alpha	metal ion binding
2	16.7861	21.947	LmjF.17.0720	0.121908	1.22336e-64	2.44671e-61	0.371	0.224	hypothetical protein, conserved	N/A
2	16.7861	21.947	LmjF.05.0540	0.121282	1.17834e-116	2.35669e-113	0.336	0.161	u6 snrna-associated sm-like protein lsm3	N/A
2	16.7861	21.947	LmjF.26.2420	0.121178	3.23298e-27	6.46597e-24	0.47	0.349	hypothetical protein, conserved	protein binding
2	16.7861	21.947	LmjF.08.1110	0.120953	3.25382e-121	6.50764e-118	0.48	0.277	stress-induced protein sti1	protein binding
2	16.7861	21.947	LmjF.35.1450	0.120901	6.55268e-10	1.31054e-06	0.342	0.231	hypothetical protein, conserved	N/A
2	16.7861	21.947	LmjF.36.2350	0.120816	9.38296e-06	0.0187659	0.308	0.289	glyceraldehyde 3-phosphate dehydrogenase, cytosolic, putative	N/A
2	16.7861	21.947	LmjF.35.0140	0.120157	2.58529e-73	5.17057e-70	0.519	0.361	hypothetical protein, conserved	N/A
2	16.7861	21.947	LmjF.36.0470	0.120078	2.40358e-39	4.80715e-36	0.415	0.307	dihydrouridine synthase domain protein-like protein	catalytic activity;flavin adenine dinucleotide binding;tRNA dihydrouridine synthase activity
2	16.7861	21.947	LmjF.30.0500	0.119384	1.8589e-36	3.7178e-33	0.314	0.195	hypothetical protein, conserved	N/A
2	16.7861	21.947	LmjF.32.3850	0.119369	3.33537e-113	6.67075e-110	0.451	0.263	hypothetical protein, unknown function	N/A
2	16.7861	21.947	LmjF.16.0320	0.119203	5.05677e-27	1.01135e-23	0.248	0.261	FHA domain containing protein, putative	protein binding
2	16.7861	21.947	LmjF.32.2100	0.118231	1.38662e-06	0.00277324	0.186	0.17	hypothetical protein, conserved	N/A
2	16.7861	21.947	LmjF.26.1060	0.118057	3.07473e-98	6.14946e-95	0.423	0.259	RNA recognition motif. (a.k.a. RRM, RBD, or RNP domain), putative	nucleic acid binding
2	16.7861	21.947	LmjF.26.2550	0.117925	4.5968e-15	9.1936e-12	0.301	0.3	hypothetical protein, conserved	N/A
2	16.7861	21.947	LmjF.18.1310	0.117513	2.71637e-151	5.43275e-148	0.497	0.277	Acetyltransferase (GNAT) family, putative	N-acetyltransferase activity
2	16.7861	21.947	LmjF.35.4640	0.11739	2.92258e-126	5.84517e-123	0.403	0.22	hypothetical protein, conserved	N/A
2	16.7861	21.947	LmjF.34.2479	0.117103	1.67243e-137	3.34486e-134	0.353	0.168	hypothetical protein, conserved	N/A
2	16.7861	21.947	LmjF.28.1410	0.11634	4.68296e-117	9.36592e-114	0.448	0.261	DNA polymerase kappa, putative	DNA-directed DNA polymerase activity;damaged DNA binding
2	16.7861	21.947	LmjF.35.4460	0.116314	2.71233e-142	5.42467e-139	0.481	0.291	sm-f snRNP core complex protein, putative	N/A
2	16.7861	21.947	LmjF.24.1315	0.113819	3.8578e-81	7.71561e-78	0.285	0.357	cyclophilin 8, putative	peptidyl-prolyl cis-trans isomerase activity
2	16.7861	21.947	LmjF.36.7000	0.11316	4.27138e-06	0.00854276	0.207	0.158	PSP1 C-terminal conserved region, putative	N/A
2	16.7861	21.947	LmjF.09.0700	0.112531	1.6275e-76	3.255e-73	0.5	0.357	hypothetical protein, conserved	N/A
2	16.7861	21.947	LmjF.16.1460	0.112152	2.74316e-167	5.48631e-164	0.369	0.16	kinesin, putative	ATP binding;microtubule binding;microtubule motor activity
2	16.7861	21.947	LmjF.06.1210	0.111258	1.01732e-54	2.03465e-51	0.516	0.385	hypothetical protein, unknown function	N/A
2	16.7861	21.947	LmjF.25.0660	0.111092	3.10661e-76	6.21323e-73	0.42	0.274	hypothetical protein, conserved	N/A
2	16.7861	21.947	LmjF.34.3360	0.110737	2.40984e-164	4.81968e-161	0.472	0.298	D-Tyr-tRNA(Tyr) deacylase, putative	D-aminoacyl-tRNA deacylase activity;aminoacyl-tRNA editing activity
2	16.7861	21.947	LmjF.32.1070	0.110634	1.22221e-68	2.44442e-65	0.406	0.258	small nuclear ribonucleoprotein, putative	N/A
2	16.7861	21.947	LmjF.29.1440	0.109979	2.60053e-185	5.20107e-182	0.454	0.27	clathrin coat assembly protein ap19, putative	N/A
2	16.7861	21.947	LmjF.20.1180	0.109216	2.18169e-24	4.36337e-21	0.715	0.595	calpain-like cysteine peptidase, putative	calcium-dependent cysteine-type endopeptidase activity
2	16.7861	21.947	LmjF.23.0845	0.108494	1.0299e-119	2.05979e-116	0.498	0.351	hypothetical protein	N/A
2	16.7861	21.947	LmjF.19.1530	0.108489	6.35563e-59	1.27113e-55	0.433	0.268	FK506-binding protein (FKBP)-type peptidyl-prolyl isomerase, putative	peptidyl-prolyl cis-trans isomerase activity;protein binding
2	16.7861	21.947	LmjF.35.3300	0.10808	9.5902e-71	1.91804e-67	0.504	0.371	hypothetical protein, unknown function	protein binding
2	16.7861	21.947	LmjF.35.4750	0.108064	1.88077e-07	0.000376154	0.476	0.391	glyceraldehyde-3-phosphate dehydrogenase-like protein	NAD binding;oxidoreductase activity, acting on the aldehyde or oxo group of donors, NAD or NADP as acceptor
2	16.7861	21.947	LmjF.28.1290	0.107353	1.77461e-39	3.54922e-36	0.39	0.267	hypothetical protein, conserved	N/A
2	16.7861	21.947	LmjF.29.2870	0.106995	5.19677e-74	1.03935e-70	0.464	0.302	hypothetical protein, conserved	N/A
2	16.7861	21.947	LmjF.34.3900	0.106975	5.98818e-56	1.19764e-52	0.277	0.135	Histidine kinase-, DNA gyrase B-, and HSP90-like ATPase, putative	protein kinase activity
2	16.7861	21.947	LmjF.07.0240	0.106807	1.9562e-44	3.91241e-41	0.363	0.236	hypothetical protein, conserved	N/A
2	16.7861	21.947	LmjF.10.1228	0.106759	3.33693e-55	6.67386e-52	0.265	0.135	methyltransferase domain containing protein, putative	N/A
2	16.7861	21.947	LmjF.36.1290	0.106344	3.36075e-22	6.7215e-19	0.362	0.261	hypothetical protein, conserved	N/A
2	16.7861	21.947	LmjF.15.0590	0.105934	1.09777e-53	2.19555e-50	0.299	0.172	hypothetical protein, conserved	N/A
2	16.7861	21.947	LmjF.29.1700	0.105555	1.99448e-18	3.98897e-15	0.376	0.247	MORN repeat, putative	N/A
2	16.7861	21.947	LmjF.01.0520	0.104975	1.42555e-73	2.85111e-70	0.468	0.31	long-chain-fatty-acid-CoA ligase, putative	N/A
2	16.7861	21.947	LmjF.36.0030	0.104912	2.2273e-64	4.4546e-61	0.473	0.333	hypothetical protein, conserved	N/A
2	16.7861	21.947	LmjF.31.0270	0.104847	3.99381e-08	7.98761e-05	0.147	0.081	2OG-Fe(II) oxygenase superfamily, putative	L-ascorbic acid binding;iron ion binding;oxidoreductase activity;oxidoreductase activity, acting on paired donors, with incorporation or reduction of molecular oxygen
2	16.7861	21.947	LmjF.11.1350	0.104228	2.7823e-262	5.5646e-259	0.466	0.224	hypothetical protein, conserved	N/A
2	16.7861	21.947	LmjF.05.0010	0.104139	1.65783e-10	3.31566e-07	0.2	0.187	hypothetical protein, conserved	N/A
2	16.7861	21.947	LmjF.16.0520	0.103793	3.84064e-22	7.68129e-19	0.346	0.22	hypothetical protein, conserved	N/A
2	16.7861	21.947	LmjF.34.1130	0.103686	1.74558e-50	3.49116e-47	0.354	0.245	hypothetical protein, conserved	N/A
2	16.7861	21.947	LmjF.21.0910	0.103429	1.81782e-252	3.63563e-249	0.46	0.228	Aminoacyl-tRNA editing domain containing protein, putative	aminoacyl-tRNA editing activity
2	16.7861	21.947	LmjF.36.4220	0.102967	6.34669e-80	1.26934e-76	0.504	0.364	hypothetical protein, conserved	N/A
2	16.7861	21.947	LmjF.34.4280	0.102955	1.13129e-142	2.26259e-139	0.428	0.238	Ankyrin repeats (3 copies), putative	protein binding
2	16.7861	21.947	LmjF.34.0175	0.102717	2.53009e-12	5.06017e-09	0.277	0.184	hypothetical protein	N/A
2	16.7861	21.947	LmjF.10.0110	0.102441	4.64387e-125	9.28773e-122	0.415	0.231	WD-repeat containing protein	protein binding
2	16.7861	21.947	LmjF.31.0710	0.102195	4.51205e-23	9.0241e-20	0.413	0.264	hypothetical protein, unknown function	N/A
2	16.7861	21.947	LmjF.26.2040	0.100901	1.1516e-202	2.30319e-199	0.423	0.203	PQ loop repeat, putative	N/A
2	16.7861	21.947	LmjF.26.2600	0.100772	1.77427e-25	3.54855e-22	0.328	0.219	hypothetical protein, conserved	N/A
2	16.7861	21.947	LmjF.34.2500	0.100337	3.51302e-103	7.02604e-100	0.64	0.498	protein phosphatase 2C-like protein	cation binding;phosphatase activity;protein serine/threonine phosphatase activity
2	16.7861	21.947	LmjF.21.1800	-0.100282	5.12435e-09	1.02487e-05	0.23	0.205	vacuolar ATP synthase, putative	proton transmembrane transporter activity
2	16.7861	21.947	LmjF.18.1360	-0.100322	9.55208e-21	1.91042e-17	0.348	0.362	hypothetical protein, conserved	N/A
2	16.7861	21.947	LmjF.36.1250	-0.100476	1.49922e-07	0.000299843	0.805	0.664	40S ribosomal protein S9, putative	RNA binding;rRNA binding;structural constituent of ribosome
2	16.7861	21.947	LmjF.36.6995	-0.100751	2.36763e-63	4.73527e-60	0.22	0.264	cytochrome oxidase subunit IX, putative	N/A
2	16.7861	21.947	LmjF.09.0090	-0.101015	4.08429e-11	8.16859e-08	0.439	0.353	RNA-binding protein 5-like protein	nucleic acid binding
2	16.7861	21.947	LmjF.24.0040	-0.101211	4.0614e-23	8.12281e-20	0.398	0.292	60S ribosomal protein L17, putative	structural constituent of ribosome
2	16.7861	21.947	LmjF.26.0190	-0.101323	1.17409e-83	2.34818e-80	0.1	0.14	Scaffold protein Nfu/NifU N terminal/NifU-like domain containing protein, putative	iron ion binding;iron-sulfur cluster binding
2	16.7861	21.947	LmjF.16.0070	-0.101646	1.50899e-05	0.0301797	0.387	0.352	hypothetical protein, conserved	N/A
2	16.7861	21.947	LmjF.27.1780	-0.101945	1.92612e-12	3.85224e-09	0.216	0.204	casein kinase I-like protein	ATP binding;protein kinase activity
2	16.7861	21.947	LmjF.34.2740	-0.102693	4.10818e-71	8.21637e-68	0.525	0.388	hypothetical protein, unknown function	N/A
2	16.7861	21.947	LmjF.25.0160	-0.103596	7.72322e-35	1.54464e-31	0.178	0.082	hypothetical protein, conserved	N/A
2	16.7861	21.947	LmjF.12.0590	-0.104574	8.26429e-41	1.65286e-37	0.249	0.274	Fusaric acid resistance protein-like, putative	N/A
2	16.7861	21.947	LmjF.24.1260	-0.10516	2.07872e-27	4.15745e-24	0.46	0.355	amastin-like surface protein-like protein	N/A
2	16.7861	21.947	LmjF.28.0720	-0.105777	1.14675e-50	2.2935e-47	0.206	0.246	Sas10/Utp3/C1D family/Sas10 C-terminal domain containing protein, putative	N/A
2	16.7861	21.947	LmjF.31.0100	-0.106346	3.14968e-08	6.29937e-05	0.379	0.358	O-sialoglycoprotein endopeptidase, putative	N/A
2	16.7861	21.947	LmjF.14.0490	-0.106507	3.00763e-20	6.01526e-17	0.723	0.586	Amastin surface glycoprotein, putative	N/A
2	16.7861	21.947	LmjF.24.1760	-0.107684	1.20248e-22	2.40496e-19	0.36	0.271	hypothetical protein, conserved	N/A
2	16.7861	21.947	LmjF.34.2290	-0.107707	5.70404e-51	1.14081e-47	0.394	0.266	twinfilin	actin binding
2	16.7861	21.947	LmjF.31.2115	-0.109201	2.14191e-36	4.28381e-33	0.181	0.211	hypothetical protein, unknown function	N/A
2	16.7861	21.947	LmjF.33.2870	-0.109301	8.79547e-165	1.75909e-161	0.127	0.226	hypothetical protein, conserved	N/A
2	16.7861	21.947	LmjF.27.1300	-0.109309	1.15907e-15	2.31814e-12	0.608	0.49	KH domain containing protein, putative	RNA binding;metal ion binding;nucleic acid binding
2	16.7861	21.947	LmjF.36.0190	-0.109704	3.39034e-10	6.78067e-07	0.995	0.97	elongation factor 2	GTP binding;GTPase activity
2	16.7861	21.947	LmjF.36.4140	-0.109711	1.35527e-11	2.71054e-08	0.128	0.126	Amastin surface glycoprotein, putative	N/A
2	16.7861	21.947	LmjF.29.0620	-0.109747	2.18983e-15	4.37966e-12	0.278	0.282	ATP-binding cassette protein subfamily A, member 10, putative	ATP binding;ATPase activity;ATPase-coupled transmembrane transporter activity
2	16.7861	21.947	LmjF.12.0130	-0.110033	1.15173e-07	0.000230347	0.246	0.168	Cell division protein kinase, putative	ATP binding;protein kinase activity
2	16.7861	21.947	LmjF.07.0230	-0.110254	7.51163e-35	1.50233e-31	0.415	0.288	Cytokine-induced anti-apoptosis inhibitor 1, Fe-S biogenesis, putative	iron-sulfur cluster binding
2	16.7861	21.947	LmjF.26.2570	-0.110469	2.48558e-18	4.97116e-15	0.804	0.666	Serine/threonine-protein kinase NEK15, putative	ATP binding;protein kinase activity
2	16.7861	21.947	LmjF.36.3810	-0.110899	6.76828e-40	1.35366e-36	0.208	0.244	aminomethyltransferase, mitochondrial, putative	aminomethyltransferase activity;protein binding
2	16.7861	21.947	LmjF.10.0370	-0.111507	1.01954e-100	2.03909e-97	0.516	0.331	folate/biopterin transporter, putative	N/A
2	16.7861	21.947	LmjF.05.0800	-0.111966	3.67045e-20	7.3409e-17	0.211	0.205	MYND zinc finger (ZnF) domain-like protein	N/A
2	16.7861	21.947	LmjF.29.1140	-0.11198	3.84272e-08	7.68545e-05	0.409	0.389	tryparedoxin-like protein	N/A
2	16.7861	21.947	LmjF.20.0460	-0.112083	8.04353e-61	1.60871e-57	0.311	0.178	Transmembrane protein 231, putative	N/A
2	16.7861	21.947	LmjF.35.3860	-0.113135	1.18762e-08	2.37524e-05	0.452	0.347	T-complex protein 1, eta subunit, putative	ATP binding;unfolded protein binding
2	16.7861	21.947	LmjF.18.0780	-0.115165	7.471e-43	1.4942e-39	0.266	0.299	DNA-directed RNA polymerase II/III subunit, putative	DNA binding;DNA-directed 5'-3' RNA polymerase activity
2	16.7861	21.947	LmjF.24.1210	-0.115468	5.07392e-06	0.0101478	0.205	0.187	Eukaryotic translation initiation factor 1, putative	translation initiation factor activity
2	16.7861	21.947	LmjF.31.1440	-0.115604	4.1692e-17	8.33839e-14	0.597	0.432	hypothetical protein, unknown function (pseudogene)	N/A
2	16.7861	21.947	LmjF.30.3200	-0.115659	3.46075e-12	6.92151e-09	0.459	0.339	ribosomal protein S26, putative	structural constituent of ribosome
2	16.7861	21.947	LmjF.07.1080	-0.115775	4.35885e-07	0.000871771	0.336	0.318	hypothetical protein, conserved	protein binding
2	16.7861	21.947	LmjF.21.0780	-0.11598	2.54103e-102	5.08206e-99	0.106	0.16	hypothetical protein, conserved	N/A
2	16.7861	21.947	LmjF.04.0580	-0.116504	3.31663e-28	6.63326e-25	0.148	0.156	spermidine synthase	catalytic activity
2	16.7861	21.947	LmjF.29.2270	-0.11836	5.80601e-11	1.1612e-07	0.199	0.184	acyltransferase, putative	transferase activity, transferring acyl groups
2	16.7861	21.947	LmjF.22.0910	-0.119817	6.34289e-23	1.26858e-19	0.387	0.4	Prp18 domain containing protein, putative	N/A
2	16.7861	21.947	LmjF.26.0140	-0.120258	1.37118e-14	2.74236e-11	0.274	0.256	adenine phosphoribosyltransferase	N/A
2	16.7861	21.947	LmjF.26.0020	-0.12083	8.83268e-103	1.76654e-99	0.15	0.216	methylmalonyl-coa epimerase-like protein	N/A
2	16.7861	21.947	LmjF.06.0870	-0.121078	4.18364e-58	8.36728e-55	0.156	0.18	protein arginine n-methyltransferase 7	protein-arginine N-methyltransferase activity
2	16.7861	21.947	LmjF.22.1410	-0.121692	2.29663e-12	4.59325e-09	0.287	0.28	centrin-4, putative	calcium ion binding
2	16.7861	21.947	LmjF.32.1810	-0.122321	6.75791e-06	0.0135158	0.396	0.33	Serine/threonine-protein kinase NEK21, putative	ATP binding;protein kinase activity
2	16.7861	21.947	LmjF.33.1930	-0.122447	7.40771e-28	1.48154e-24	0.208	0.224	phosphoribosylpyrophosphate synthetase, putative	magnesium ion binding;ribose phosphate diphosphokinase activity
2	16.7861	21.947	LmjF.08.0680	-0.12338	4.83088e-31	9.66176e-28	0.86	0.742	amastin-like protein	N/A
2	16.7861	21.947	LmjF.16.0400	-0.123936	1.16053e-05	0.0232106	0.452	0.375	hypothetical protein, conserved	N/A
2	16.7861	21.947	LmjF.33.0960	-0.124087	3.77994e-37	7.55988e-34	0.152	0.177	nicotinate phosphoribosyltransferase, putative	nicotinate phosphoribosyltransferase activity;nicotinate-nucleotide diphosphorylase (carboxylating) activity
2	16.7861	21.947	LmjF.26.0620	-0.125748	1.00703e-09	2.01406e-06	0.703	0.58	10 kDa heat shock protein, putative	N/A
2	16.7861	21.947	LmjF.31.1900	-0.125986	2.27489e-09	4.54978e-06	0.485	0.356	ubiquitin-fusion protein	protein binding;structural constituent of ribosome
2	16.7861	21.947	LmjF.36.0600	-0.128539	1.74539e-08	3.49078e-05	0.518	0.373	ubiquitin/ribosomal protein S27a, putative	protein binding;structural constituent of ribosome
2	16.7861	21.947	LmjF.15.0440	-0.129109	2.33391e-24	4.66782e-21	0.374	0.277	tb-292 membrane associated protein-like protein (pseudogene)	N/A
2	16.7861	21.947	LmjF.34.4200	-0.130301	4.05136e-161	8.10272e-158	0.141	0.238	hypothetical protein, unknown function	N/A
2	16.7861	21.947	LmjF.36.3580	-0.132784	8.73987e-27	1.74797e-23	0.284	0.29	Protein of unknown function (DUF2009), putative	N/A
2	16.7861	21.947	LmjF.36.5480	-0.133324	2.07184e-45	4.14369e-42	0.541	0.435	hypothetical protein, conserved	N/A
2	16.7861	21.947	LmjF.34.2330	-0.134432	1.22938e-63	2.45876e-60	0.311	0.368	clathrin coat assembly protein AP17, putative	clathrin adaptor activity
2	16.7861	21.947	LmjF.34.4250	-0.135881	1.39251e-83	2.78501e-80	0.155	0.203	hypothetical protein, conserved	N/A
2	16.7861	21.947	LmjF.01.0010	-0.13651	8.40185e-39	1.68037e-35	0.546	0.442	Protein of unknown function (DUF2946), putative	N/A
2	16.7861	21.947	LmjF.31.0530	-0.136571	1.55974e-74	3.11949e-71	0.57	0.417	hypothetical protein, unknown function	N/A
2	16.7861	21.947	LmjF.23.0200	-0.136855	2.30687e-14	4.61373e-11	0.45	0.327	endoribonuclease L-PSP (pb5), putative	N/A
2	16.7861	21.947	LmjF.15.0630	-0.13794	1.03405e-97	2.0681e-94	0.533	0.357	hypothetical protein, unknown function	N/A
2	16.7861	21.947	LmjF.34.2000	-0.142331	8.79935e-191	1.75987e-187	0.231	0.362	pyroglutamyl-peptidase I (C15 family)	N/A
2	16.7861	21.947	LmjF.23.1000	-0.142822	7.82829e-32	1.56566e-28	0.352	0.382	hypothetical protein, unknown function	N/A
2	16.7861	21.947	LmjF.36.6290	-0.143481	4.07867e-17	8.15734e-14	0.652	0.528	glucose transporter 2	transmembrane transporter activity
2	16.7861	21.947	LmjF.31.1090	-0.144205	3.95907e-24	7.91815e-21	0.372	0.271	hypothetical protein, conserved	N/A
2	16.7861	21.947	LmjF.32.1960	-0.145376	2.19826e-22	4.39652e-19	0.119	0.109	1-acyl-sn-glycerol-3-phosphateacyltransferase-like protein, putative	transferase activity, transferring acyl groups
2	16.7861	21.947	LmjF.31.1420	-0.14753	1.59235e-10	3.18471e-07	0.45	0.369	hypothetical protein, conserved	N/A
2	16.7861	21.947	LmjF.14.0590	-0.149975	5.74472e-07	0.00114894	0.271	0.202	hypothetical protein, conserved	N/A
2	16.7861	21.947	LmjF.17.0690	-0.151333	1.84932e-28	3.69865e-25	0.214	0.237	hypothetical protein, conserved	N/A
2	16.7861	21.947	LmjF.07.0800	-0.151576	1.26594e-34	2.53188e-31	0.533	0.387	flavoprotein subunit-like protein	heme binding
2	16.7861	21.947	LmjF.11.1040	-0.15159	3.63148e-06	0.00726295	0.266	0.246	hypothetical protein, conserved	N/A
2	16.7861	21.947	LmjF.10.1225	-0.152624	2.63598e-36	5.27195e-33	0.161	0.173	hypothetical protein, conserved	N/A
2	16.7861	21.947	LmjF.33.0220	-0.153031	1.33346e-201	2.66691e-198	0.158	0.29	hypothetical protein, conserved	N/A
2	16.7861	21.947	LmjF.09.0080	-0.154861	6.53332e-27	1.30666e-23	0.373	0.384	RNA-binding protein 5-like protein	nucleic acid binding
2	16.7861	21.947	LmjF.03.0190	-0.157362	2.57542e-18	5.15083e-15	0.322	0.332	U2 splicing auxiliary factor, putative	RNA binding;metal ion binding;nucleic acid binding
2	16.7861	21.947	LmjF.10.1210	-0.157638	5.23882e-104	1.04776e-100	0.176	0.252	hypothetical protein, conserved	N/A
2	16.7861	21.947	LmjF.01.0420	-0.158028	2.66747e-08	5.33495e-05	0.489	0.347	ribosomal protein S7, putative	structural constituent of ribosome
2	16.7861	21.947	LmjF.17.0630	-0.158657	1.67393e-19	3.34785e-16	0.269	0.271	hypothetical protein, unknown function	N/A
2	16.7861	21.947	LmjF.34.4290	-0.15931	6.00948e-19	1.2019e-15	0.27	0.274	nucleolar protein family a, putative	N/A
2	16.7861	21.947	LmjF.35.0900	-0.159809	2.88391e-19	5.76783e-16	0.202	0.177	hypothetical protein, conserved	N/A
2	16.7861	21.947	LmjF.03.0460	-0.161613	1.03649e-32	2.07297e-29	0.416	0.303	hypothetical protein	N/A
2	16.7861	21.947	LmjF.12.0890	-0.161724	2.36303e-05	0.0472606	0.181	0.119	promastigote surface antigen 38S	N/A
2	16.7861	21.947	LmjF.30.3190	-0.162046	1.33002e-35	2.66004e-32	0.411	0.292	3-hydroxy-3-methylglutaryl-CoA reductase	hydroxymethylglutaryl-CoA reductase (NADPH) activity;oxidoreductase activity, acting on the CH-OH group of donors, NAD or NADP as acceptor;protein binding
2	16.7861	21.947	LmjF.17.0083	-0.162048	3.16485e-06	0.0063297	0.96	0.891	elongation factor 1-alpha	GTP binding;GTPase activity;translation elongation factor activity
2	16.7861	21.947	LmjF.26.1980	-0.162127	5.87628e-30	1.17526e-26	0.579	0.454	hypothetical protein, conserved	N/A
2	16.7861	21.947	LmjF.06.0310	-0.16221	7.44914e-17	1.48983e-13	0.346	0.353	folate/biopterin transporter, putative	N/A
2	16.7861	21.947	LmjF.34.0860	-0.1647	5.58791e-10	1.11758e-06	0.648	0.51	60S ribosomal protein L13a, putative	structural constituent of ribosome
2	16.7861	21.947	LmjF.36.5810	-0.167223	2.07899e-11	4.15798e-08	0.499	0.418	hypothetical protein, conserved	N/A
2	16.7861	21.947	LmjF.22.0790	-0.169924	3.92611e-31	7.85222e-28	0.198	0.205	translation initiation factor SUI1, putative	RNA binding;translation initiation factor activity
2	16.7861	21.947	LmjF.35.1430	-0.169953	2.19807e-06	0.00439614	0.361	0.337	60S ribosomal protein L2, putative	structural constituent of ribosome
2	16.7861	21.947	LmjF.35.2630	-0.171351	1.64623e-53	3.29247e-50	0.137	0.156	PHD-like zinc-binding domain containing protein, putative	N/A
2	16.7861	21.947	LmjF.27.1200	-0.174764	2.00523e-19	4.01045e-16	0.354	0.36	RING-H2 zinc finger, putative	N/A
2	16.7861	21.947	LmjF.30.3340	-0.175612	1.75241e-05	0.0350481	0.713	0.544	60S ribosomal protein L9, putative	rRNA binding;structural constituent of ribosome
2	16.7861	21.947	LmjF.33.1630	-0.176526	2.75514e-14	5.51028e-11	0.218	0.202	cyclophilin 4, putative	peptidyl-prolyl cis-trans isomerase activity
2	16.7861	21.947	LmjF.30.3590	-0.182971	9.87767e-06	0.0197553	0.382	0.281	40S ribosomal protein S14	structural constituent of ribosome
2	16.7861	21.947	LmjF.13.1690	-0.186312	6.10817e-41	1.22163e-37	0.494	0.354	Protein Associated with Differentiation, putative	transmembrane transporter activity
2	16.7861	21.947	LmjF.36.3830	-0.18738	4.93306e-40	9.86612e-37	0.207	0.228	Zinc finger, C3HC4 type (RING finger), putative	N/A
2	16.7861	21.947	LmjF.32.1050	-0.18864	6.32835e-176	1.26567e-172	0.193	0.311	vacuolar sorting-like protein	N/A
2	16.7861	21.947	LmjF.30.0300	-0.19676	5.04011e-19	1.00802e-15	0.31	0.319	hypothetical protein, conserved	N/A
2	16.7861	21.947	LmjF.34.2470	-0.197675	2.77048e-09	5.54096e-06	0.607	0.432	ribosomal protein l35a, putative	structural constituent of ribosome
2	16.7861	21.947	LmjF.13.0080	-0.200394	2.76347e-09	5.52693e-06	0.31	0.3	mitochondrial DNA polymerase I protein B, putative	DNA binding;DNA-directed DNA polymerase activity;nucleic acid binding
2	16.7861	21.947	LmjF.21.0791	-0.204306	7.64514e-11	1.52903e-07	0.176	0.169	putative PfkB family sugar kinase	N/A
2	16.7861	21.947	LmjF.26.0330	-0.209188	2.14832e-216	4.29663e-213	0.407	0.192	mitotic cyclin, putative	N/A
2	16.7861	21.947	LmjF.29.0280	-0.2116	9.59586e-10	1.91917e-06	0.726	0.608	D-lactate dehydrogenase-like protein	FAD binding;catalytic activity;flavin adenine dinucleotide binding;oxidoreductase activity
2	16.7861	21.947	LmjF.36.0850	-0.213315	3.55671e-12	7.11343e-09	0.347	0.273	hypothetical protein, conserved	N/A
2	16.7861	21.947	LmjF.33.2930	-0.215472	1.97519e-61	3.95037e-58	0.317	0.371	Present in the outer mitochondrial membrane proteome 22	N/A
2	16.7861	21.947	LmjF.35.2660	-0.216704	7.64252e-86	1.5285e-82	0.434	0.275	hypothetical protein, conserved	N/A
2	16.7861	21.947	LmjF.30.0805	-0.216962	9.08396e-179	1.81679e-175	0.188	0.313	hypothetical protein, conserved	N/A
2	16.7861	21.947	LmjF.35.3250	-0.230334	8.54735e-20	1.70947e-16	0.367	0.264	replication factor C, subunit 3, putative	ATP binding;ATPase activity;DNA binding
2	16.7861	21.947	LmjF.03.0590	-0.233511	3.35177e-24	6.70354e-21	0.335	0.228	DNA repair helicase, putative	ATP binding;DNA binding;DNA helicase activity;helicase activity;hydrolase activity, acting on acid anhydrides, in phosphorus-containing anhydrides;nucleic acid binding
2	16.7861	21.947	LmjF.23.0720	-0.233926	4.30048e-08	8.60096e-05	0.752	0.639	RNA recognition motif. (a.k.a. RRM, RBD, or RNP domain), putative	nucleic acid binding
2	16.7861	21.947	LmjF.23.1050	-0.233952	5.94462e-09	1.18892e-05	0.467	0.352	small hydrophilic endoplasmic reticulum-associated protein (sherp)	N/A
2	16.7861	21.947	LmjF.10.0380	-0.235137	1.46886e-11	2.93772e-08	0.982	0.937	folate/biopterin transporter, putative	N/A
2	16.7861	21.947	LmjF.25.1120	-0.235281	5.89277e-08	0.000117855	0.66	0.556	aldehyde dehydrogenase, mitochondrial precursor	oxidoreductase activity;oxidoreductase activity, acting on the aldehyde or oxo group of donors, NAD or NADP as acceptor
2	16.7861	21.947	LmjF.21.1150	-0.236178	1.92561e-49	3.85123e-46	0.182	0.232	hypothetical protein, conserved	N/A
2	16.7861	21.947	LmjF.36.5350	-0.246444	2.74471e-23	5.48941e-20	0.283	0.307	kinetoplastid kinetochore protein 2, putative	ATP binding;protein kinase activity
2	16.7861	21.947	LmjF.36.3400	-0.252971	1.206e-11	2.41201e-08	0.391	0.366	ribosomal protein L29, putative	structural constituent of ribosome
2	16.7861	21.947	LmjF.36.1310	-0.256016	1.12185e-11	2.24371e-08	0.337	0.33	hypothetical protein, conserved	N/A
2	16.7861	21.947	LmjF.34.3650	-0.26069	1.06493e-06	0.00212986	0.53	0.389	60S ribosomal protein L21, putative	structural constituent of ribosome
2	16.7861	21.947	LmjF.33.0520	-0.269638	1.76841e-22	3.53682e-19	0.368	0.375	d-xylulose reductase, putative	oxidoreductase activity;zinc ion binding
2	16.7861	21.947	LmjF.05.1215	-0.278619	6.22101e-42	1.2442e-38	0.201	0.225	surface antigen-like protein	N/A
2	16.7861	21.947	LmjF.27.0680	-0.308641	1.97889e-09	3.95778e-06	0.753	0.629	amino acid permease, putative	N/A
2	16.7861	21.947	LmjF.23.0760	-0.309763	8.10397e-17	1.62079e-13	0.403	0.312	mitochondrial RNA binding protein, putative	N/A
2	16.7861	21.947	LmjF.35.1355	-0.316156	3.66716e-09	7.33432e-06	0.358	0.355	hypothetical protein	N/A
2	16.7861	21.947	LmjF.34.0190	-0.330853	6.1541e-25	1.23082e-21	0.309	0.321	Domain of unknown function (DUF1935), putative	N/A
2	16.7861	21.947	LmjF.35.1100	-0.335147	9.6051e-15	1.92102e-11	0.458	0.371	hypothetical protein, conserved	N/A
2	16.7861	21.947	LmjF.28.0550	-0.353416	1.89421e-69	3.78843e-66	0.239	0.307	DNA repair protein RAD51, putative	ATP binding;DNA binding;DNA-dependent ATPase activity;double-stranded DNA binding;nucleotide binding;recombinase activity;single-stranded DNA binding
2	16.7861	21.947	LmjF.05.1050	-0.364675	8.58341e-22	1.71668e-18	0.153	0.176	hypothetical protein, unknown function	N/A
2	16.7861	21.947	LmjF.35.4440	-0.373457	2.74664e-40	5.49327e-37	0.364	0.243	hypothetical protein, conserved	N/A
2	16.7861	21.947	LmjF.27.2270	-0.384979	3.26945e-20	6.5389e-17	0.36	0.379	hypothetical protein, conserved	N/A
2	16.7861	21.947	LmjF.35.0500	-0.395692	3.44691e-27	6.89382e-24	0.581	0.442	proteophosphoglycan ppg3, putative	protein binding;transmembrane signaling receptor activity
2	16.7861	21.947	LmjF.35.1650	-0.40962	4.35156e-06	0.00870313	0.204	0.201	hypothetical protein, conserved	N/A
2	16.7861	21.947	LmjF.35.4550	-0.416957	4.79618e-08	9.59237e-05	0.31	0.307	hypothetical protein, conserved	protein binding
2	16.7861	21.947	LmjF.07.0040	-0.430306	7.34749e-23	1.4695e-19	0.364	0.367	hypothetical protein, conserved	N/A
2	16.7861	21.947	LmjF.23.1130	-0.430873	3.68957e-34	7.37913e-31	0.19	0.231	hypothetical protein, conserved	microtubule binding
2	16.7861	21.947	LmjF.28.2640	-0.437285	9.72618e-19	1.94524e-15	0.41	0.321	molybdenum cofactor biosynthesis protein, putative	N/A
2	16.7861	21.947	LmjF.32.3430	-0.446502	6.14451e-29	1.2289e-25	0.42	0.308	Uncharacterised protein family UPF0564, putative	N/A
2	16.7861	21.947	LmjF.25.0920	-0.456772	1.43717e-14	2.87434e-11	0.315	0.316	Histone RNA hairpin-binding protein RNA-binding domain containing protein, putative	RNA binding;mRNA binding
2	16.7861	21.947	LmjF.23.0960	-0.459321	6.76499e-69	1.353e-65	0.475	0.342	hypothetical protein, conserved	N/A
2	16.7861	21.947	LmjF.35.3440	-0.48976	1.368e-23	2.736e-20	0.427	0.435	replication factor A protein 3, putative	DNA binding
2	16.7861	21.947	LmjF.32.2940	-0.493383	3.89701e-45	7.79402e-42	0.404	0.283	hypothetical protein, conserved	N/A
2	16.7861	21.947	LmjF.18.1180	-0.502694	3.52748e-06	0.00705497	0.401	0.336	hypothetical protein, conserved	N/A
2	16.7861	21.947	LmjF.35.0950	-0.509888	7.80116e-08	0.000156023	0.38	0.305	cell cycle sequence binding phosphoprotein (RBP33), putative	N/A
2	16.7861	21.947	LmjF.06.1200	-0.512034	1.08949e-16	2.17897e-13	0.387	0.301	hypothetical protein, unknown function	N/A
2	16.7861	21.947	LmjF.08.0010	-0.524611	5.65779e-31	1.13156e-27	0.168	0.216	adaptor complex protein (AP) 3 delta subunit 1, putative	ATP binding;protein binding
2	16.7861	21.947	LmjF.36.4190	-0.534077	4.46699e-121	8.93398e-118	0.282	0.385	GINS complex protein, putative	N/A
2	16.7861	21.947	LmjF.28.2385	-0.550991	1.96251e-47	3.92503e-44	0.474	0.34	DNA replication licensing factor MCM6, putative	ATP binding;DNA binding;DNA helicase activity
2	16.7861	21.947	LmjF.28.0850	-0.573105	2.04699e-14	4.09398e-11	0.511	0.433	DNA replication licensing factor MCM2, putative	ATP binding;DNA binding
2	16.7861	21.947	LmjF.36.5820	-0.573364	2.27805e-34	4.5561e-31	0.217	0.272	mkiaa0324 protein-like protein	N/A
2	16.7861	21.947	LmjF.35.0380	-0.600715	3.55273e-07	0.000710547	0.438	0.419	thioredoxin, putative	N/A
2	16.7861	21.947	LmjF.08.0890	-0.602916	1.93925e-38	3.8785e-35	0.424	0.296	mitochondrial DNA polymerase beta	DNA binding;DNA polymerase activity;DNA-directed DNA polymerase activity
2	16.7861	21.947	LmjF.26.2210	-0.634822	5.21797e-07	0.00104359	0.427	0.347	AAA ATPase domain containing protein, putative	N/A
2	16.7861	21.947	LmjF.25.1780	-0.64838	2.26868e-21	4.53737e-18	0.347	0.362	ATP-grasp domain containing protein, putative	ATP binding;D-alanine-D-alanine ligase activity;metal ion binding;protein binding
2	16.7861	21.947	LmjF.27.0350	-0.699589	7.85138e-11	1.57028e-07	0.536	0.435	RNA recognition motif (a.k.a. RRM, RBD, or RNP domain), putative	nucleic acid binding
2	16.7861	21.947	LmjF.22.0660	-0.734907	6.99465e-18	1.39893e-14	0.477	0.464	glucoamylase-like protein	N/A
2	16.7861	21.947	LmjF.36.1590	-0.796219	1.62513e-17	3.25025e-14	0.432	0.329	STAG domain containing protein, putative	N/A
2	16.7861	21.947	LmjF.33.3240	-0.818535	1.0571e-65	2.11421e-62	0.373	0.431	h1 histone-like protein	N/A
2	16.7861	21.947	LmjF.33.0650	-0.840493	2.33151e-43	4.66302e-40	0.308	0.359	hypothetical protein, conserved	N/A
2	16.7861	21.947	LmjF.15.1490	-0.872876	1.15568e-53	2.31135e-50	0.304	0.373	hypothetical protein, conserved	N/A
2	16.7861	21.947	LmjF.13.0690	-0.918277	5.5371e-26	1.10742e-22	0.496	0.504	PSP1 C-terminal conserved region, putative	N/A
3	3.74851	37.2854	LmjF.21.1820	0.512531	9.62864e-94	1.92573e-90	0.974	0.685	60S ribosomal protein L37a, putative	structural constituent of ribosome
3	3.74851	37.2854	LmjF.30.3650	0.469791	2.80669e-32	5.61339e-29	0.997	0.902	ribosomal protein L15, putative	structural constituent of ribosome
3	3.74851	37.2854	LmjF.15.1490	0.4467	9.35746e-17	1.87149e-13	0.596	0.313	hypothetical protein, conserved	N/A
3	3.74851	37.2854	LmjF.22.0660	0.444524	0	0	0.89	0.383	glucoamylase-like protein	N/A
3	3.74851	37.2854	LmjF.22.0460	0.434068	2.21613e-80	4.43227e-77	0.994	0.857	40S ribosomal protein S15, putative	RNA binding;structural constituent of ribosome
3	3.74851	37.2854	LmjF.21.1150	0.431503	5.39734e-77	1.07947e-73	0.547	0.159	hypothetical protein, conserved	N/A
3	3.74851	37.2854	LmjF.33.0650	0.426859	1.71348e-12	3.42696e-09	0.579	0.304	hypothetical protein, conserved	N/A
3	3.74851	37.2854	LmjF.35.0450	0.425551	0	0	0.14	0.05	hypothetical protein, unknown function	N/A
3	3.74851	37.2854	LmjF.35.1100	0.397105	0	0	0.776	0.311	hypothetical protein, conserved	N/A
3	3.74851	37.2854	LmjF.21.1210	0.386873	3.83063e-19	7.66126e-16	0.556	0.25	thymidine kinase, putative	ATP binding;thymidine kinase activity
3	3.74851	37.2854	LmjF.35.2630	0.378091	5.53684e-29	1.10737e-25	0.341	0.115	PHD-like zinc-binding domain containing protein, putative	N/A
3	3.74851	37.2854	LmjF.04.0580	0.376558	6.92e-182	1.384e-178	0.264	0.133	spermidine synthase	catalytic activity
3	3.74851	37.2854	LmjF.22.0790	0.370831	1.17936e-19	2.35871e-16	0.386	0.168	translation initiation factor SUI1, putative	RNA binding;translation initiation factor activity
3	3.74851	37.2854	LmjF.29.0850	0.367836	5.10865e-24	1.02173e-20	0.685	0.42	High mobility group protein TDP1	N/A
3	3.74851	37.2854	LmjF.36.5120	0.366416	4.48345e-81	8.96691e-78	0.99	0.823	40S ribosomal protein SA, putative	structural constituent of ribosome
3	3.74851	37.2854	LmjF.27.0350	0.365542	1.99904e-56	3.99807e-53	0.707	0.404	RNA recognition motif (a.k.a. RRM, RBD, or RNP domain), putative	nucleic acid binding
3	3.74851	37.2854	LmjF.26.1640	0.361744	1.39082e-71	2.78165e-68	0.998	0.88	40S ribosomal protein S33, putative	structural constituent of ribosome
3	3.74851	37.2854	LmjF.05.0450	0.358538	5.36106e-42	1.07221e-38	0.378	0.196	hypothetical protein, conserved	N/A
3	3.74851	37.2854	LmjF.17.0690	0.358373	2.04446e-05	0.0408892	0.486	0.183	hypothetical protein, conserved	N/A
3	3.74851	37.2854	LmjF.31.1570	0.35711	7.59833e-08	0.000151967	0.608	0.361	cytochrome c oxidase VIII (COX VIII), putative	N/A
3	3.74851	37.2854	LmjF.13.0690	0.35505	0	0	0.891	0.426	PSP1 C-terminal conserved region, putative	N/A
3	3.74851	37.2854	LmjF.22.1670	0.34569	0	0	0.167	0.064	hypothetical protein, conserved	N/A
3	3.74851	37.2854	LmjF.35.0380	0.344131	0	0	0.803	0.347	thioredoxin, putative	N/A
3	3.74851	37.2854	LmjF.35.4760	0.343248	1.59855e-45	3.19709e-42	0.579	0.242	hypothetical protein, conserved	N/A
3	3.74851	37.2854	LmjF.07.0040	0.343156	0	0	0.827	0.275	hypothetical protein, conserved	N/A
3	3.74851	37.2854	LmjF.28.0540	0.338071	5.99372e-188	1.19874e-184	0.875	0.465	ribosomal protein S26, putative	structural constituent of ribosome
3	3.74851	37.2854	LmjF.25.0920	0.324152	1.6569e-90	3.3138e-87	0.625	0.255	Histone RNA hairpin-binding protein RNA-binding domain containing protein, putative	RNA binding;mRNA binding
3	3.74851	37.2854	LmjF.32.2940	0.32263	2.03822e-25	4.07644e-22	0.566	0.254	hypothetical protein, conserved	N/A
3	3.74851	37.2854	LmjF.33.3150	0.317064	3.28977e-131	6.57955e-128	0.95	0.596	40S ribosomal protein S13, putative	structural constituent of ribosome
3	3.74851	37.2854	LmjF.26.2210	0.316212	1.17018e-297	2.34036e-294	0.735	0.289	AAA ATPase domain containing protein, putative	N/A
3	3.74851	37.2854	LmjF.35.1650	0.315614	1.55038e-07	0.000310075	0.417	0.159	hypothetical protein, conserved	N/A
3	3.74851	37.2854	LmjF.34.0010	0.313006	1.40146e-86	2.80292e-83	0.934	0.653	short chain dehydrogenase, putative	N/A
3	3.74851	37.2854	LmjF.29.2470	0.311994	4.32347e-63	8.64694e-60	0.941	0.727	60S ribosomal protein L13, putative	structural constituent of ribosome
3	3.74851	37.2854	LmjF.34.4290	0.308303	1.39105e-52	2.7821e-49	0.574	0.214	nucleolar protein family a, putative	N/A
3	3.74851	37.2854	LmjF.30.3090	0.307032	4.89111e-07	0.000978222	0.612	0.365	RNA-binding protein 42 (RNA-binding motif protein 42), putative	N/A
3	3.74851	37.2854	LmjF.25.1440	0.306872	0	0	0.803	0.275	hypothetical protein, conserved	nucleic acid binding
3	3.74851	37.2854	LmjF.33.3240	0.302799	3.9842e-27	7.96839e-24	0.679	0.369	h1 histone-like protein	N/A
3	3.74851	37.2854	LmjF.36.4190	0.300476	7.92396e-304	1.58479e-300	0.75	0.29	GINS complex protein, putative	N/A
3	3.74851	37.2854	LmjF.32.2960	0.299766	0	0	0.762	0.277	DNA replication licensing factor MCM7, putative	ATP binding;DNA binding;DNA helicase activity
3	3.74851	37.2854	LmjF.21.1060	0.299197	4.87979e-87	9.75958e-84	0.768	0.407	40S ribosomal protein S23, putative	structural constituent of ribosome
3	3.74851	37.2854	LmjF.24.0290	0.297637	0	0	0.762	0.274	NLI interacting factor-like phosphatase, putative	N/A
3	3.74851	37.2854	LmjF.36.1970	0.297569	0	0	0.165	0.069	2OG-Fe(II) oxygenase superfamily, putative	oxidoreductase activity
3	3.74851	37.2854	LmjF.35.1230	0.296965	3.50907e-171	7.01815e-168	0.728	0.316	short chain dehydrogenase, putative	N/A
3	3.74851	37.2854	LmjF.23.0960	0.296242	0	0	0.77	0.288	hypothetical protein, conserved	N/A
3	3.74851	37.2854	LmjF.09.0030	0.294758	1.22617e-112	2.45233e-109	0.246	0.084	Peroxisomal biogenesis factor 11 (PEX11), putative	N/A
3	3.74851	37.2854	LmjF.31.1370	0.292192	2.70754e-229	5.41509e-226	0.216	0.108	hypothetical protein, conserved	protein binding
3	3.74851	37.2854	LmjF.36.5350	0.289181	0	0	0.718	0.221	kinetoplastid kinetochore protein 2, putative	ATP binding;protein kinase activity
3	3.74851	37.2854	LmjF.12.0890	0.288339	5.08032e-176	1.01606e-172	0.237	0.11	promastigote surface antigen 38S	N/A
3	3.74851	37.2854	LmjF.31.2715	0.286909	1.02078e-15	2.04156e-12	0.493	0.166	hypothetical protein, conserved	N/A
3	3.74851	37.2854	LmjF.33.1630	0.28647	3.7797e-32	7.5594e-29	0.372	0.172	cyclophilin 4, putative	peptidyl-prolyl cis-trans isomerase activity
3	3.74851	37.2854	LmjF.35.3100	0.283989	1.47998e-46	2.95995e-43	0.995	0.865	ATP-dependent RNA helicase, putative	ATP binding;helicase activity;nucleic acid binding
3	3.74851	37.2854	LmjF.28.2555	0.283288	3.19922e-62	6.39844e-59	0.982	0.755	40S ribosomal protein S17, putative	structural constituent of ribosome
3	3.74851	37.2854	LmjF.21.0740	0.282234	1.33282e-29	2.66563e-26	0.716	0.432	ATPase subunit 9, putative	proton transmembrane transporter activity
3	3.74851	37.2854	LmjF.05.0970	0.281595	2.72535e-98	5.45071e-95	0.277	0.124	3-mercaptopyruvate sulfurtransferase	N/A
3	3.74851	37.2854	LmjF.24.0590	0.279642	1.60226e-163	3.20452e-160	0.196	0.036	hypothetical protein, unknown function	N/A
3	3.74851	37.2854	LmjF.35.2050	0.277192	3.24258e-47	6.48517e-44	0.997	0.89	60S ribosomal protein L32	structural constituent of ribosome
3	3.74851	37.2854	LmjF.08.0010	0.276756	7.48679e-50	1.49736e-46	0.37	0.175	adaptor complex protein (AP) 3 delta subunit 1, putative	ATP binding;protein binding
3	3.74851	37.2854	LmjF.34.1240	0.274024	2.83202e-282	5.66404e-279	0.172	0.056	3'-5' exonuclease, putative	3'-5' exonuclease activity;metal ion binding;nucleic acid binding
3	3.74851	37.2854	LmjF.36.2970	0.27259	3.23681e-16	6.47363e-13	0.348	0.099	hypothetical protein, conserved	N/A
3	3.74851	37.2854	LmjF.34.1245	0.27002	2.80775e-292	5.61549e-289	0.154	0.068	hypothetical protein, conserved	N/A
3	3.74851	37.2854	LmjF.36.1340	0.270002	3.57086e-32	7.14172e-29	0.362	0.155	N-acetyltransferase subunit Nat1, putative	protein binding
3	3.74851	37.2854	LmjF.27.1240	0.268907	3.05487e-07	0.000610974	0.607	0.355	histone H1, putative	N/A
3	3.74851	37.2854	LmjF.03.0980	0.268567	2.30873e-220	4.61746e-217	0.917	0.494	eukaryotic translation initiation factor 2 subunit alpha	RNA binding;nucleic acid binding;translation initiation factor activity
3	3.74851	37.2854	LmjF.34.2970	0.266728	4.37484e-229	8.74968e-226	0.24	0.127	Nucleus and spindle associated protein 4, putative	N/A
3	3.74851	37.2854	LmjF.10.0070	0.266181	2.31731e-133	4.63463e-130	0.776	0.38	ribosomal protein l35a, putative	structural constituent of ribosome
3	3.74851	37.2854	LmjF.36.2660	0.265918	0	0	0.655	0.158	dihydrolipoamide acetyltransferase precursor, putative	transferase activity, transferring acyl groups
3	3.74851	37.2854	LmjF.36.3220	0.262282	9.51303e-194	1.90261e-190	0.777	0.378	hypothetical protein, conserved	N/A
3	3.74851	37.2854	LmjF.27.0130	0.261764	2.40373e-70	4.80747e-67	0.999	0.966	WW domain/Zinc finger C-x8-C-x5-C-x3-H type (and similar), putative	metal ion binding;protein binding
3	3.74851	37.2854	LmjF.35.1920	0.260961	5.21136e-175	1.04227e-171	0.874	0.459	60S ribosomal protein L36, putative	structural constituent of ribosome
3	3.74851	37.2854	LmjF.26.1665	0.260308	1.98667e-28	3.97333e-25	0.363	0.15	hypothetical protein, conserved	N/A
3	3.74851	37.2854	LmjF.10.0850	0.259572	1.15838e-73	2.31676e-70	0.369	0.207	nuclear transport factor 2, putative	N/A
3	3.74851	37.2854	LmjF.14.0670	0.258342	1.01235e-155	2.02471e-152	0.889	0.498	fatty acid elongase, putative	N/A
3	3.74851	37.2854	LmjF.28.0850	0.257413	9.18956e-229	1.83791e-225	0.807	0.377	DNA replication licensing factor MCM2, putative	ATP binding;DNA binding
3	3.74851	37.2854	LmjF.36.3810	0.256929	8.99607e-27	1.79921e-23	0.415	0.202	aminomethyltransferase, mitochondrial, putative	aminomethyltransferase activity;protein binding
3	3.74851	37.2854	LmjF.18.1180	0.255046	1.10805e-21	2.21611e-18	0.599	0.299	hypothetical protein, conserved	N/A
3	3.74851	37.2854	LmjF.36.1900	0.252807	3.43346e-208	6.86693e-205	0.702	0.262	kinetoplastid kinetochore protein 1	N/A
3	3.74851	37.2854	LmjF.04.0750	0.252596	3.44899e-46	6.89798e-43	0.847	0.569	60S ribosomal protein L10, putative	structural constituent of ribosome
3	3.74851	37.2854	LmjF.36.2020	0.252574	3.48801e-30	6.97602e-27	0.715	0.438	chaperonin HSP60, mitochondrial precursor	ATP binding
3	3.74851	37.2854	LmjF.04.0123	0.251959	7.69478e-90	1.53896e-86	0.597	0.204	hypothetical protein, conserved	N/A
3	3.74851	37.2854	LmjF.31.0070	0.250875	6.78109e-104	1.35622e-100	0.348	0.164	helicase-like protein	ATP binding;DNA binding;hydrolase activity
3	3.74851	37.2854	LmjF.19.1450	0.249168	9.32759e-08	0.000186552	0.42	0.179	oxidoreductase-like protein	oxidoreductase activity
3	3.74851	37.2854	LmjF.26.0620	0.248995	9.2554e-125	1.85108e-121	0.908	0.543	10 kDa heat shock protein, putative	N/A
3	3.74851	37.2854	LmjF.35.2030	0.248708	3.62883e-164	7.25765e-161	0.7	0.283	hypothetical protein, unknown function	calcium ion binding
3	3.74851	37.2854	LmjF.30.1370	0.247617	0	0	0.906	0.386	PSP1 C-terminal conserved region, putative	N/A
3	3.74851	37.2854	LmjF.30.0300	0.247607	0	0	0.757	0.231	hypothetical protein, conserved	N/A
3	3.74851	37.2854	LmjF.34.0910	0.247113	7.78465e-169	1.55693e-165	0.808	0.39	hypothetical protein, conserved	N/A
3	3.74851	37.2854	LmjF.32.2690	0.246742	1.61029e-55	3.22058e-52	0.831	0.527	ribosomal protein L27, putative	structural constituent of ribosome
3	3.74851	37.2854	LmjF.23.1130	0.24515	2.4444e-63	4.8888e-60	0.375	0.193	hypothetical protein, conserved	microtubule binding
3	3.74851	37.2854	LmjF.14.0660	0.24508	1.91326e-08	3.82652e-05	0.455	0.256	fatty acid elongase, putative	N/A
3	3.74851	37.2854	LmjF.31.0190	0.244872	1.22523e-71	2.45046e-68	0.274	0.104	nucleolar protein, putative	RNA binding;S-adenosylmethionine-dependent methyltransferase activity;methyltransferase activity
3	3.74851	37.2854	LmjF.30.0735	0.242411	2.12571e-292	4.25141e-289	0.68	0.214	heat shock protein grpe	adenyl-nucleotide exchange factor activity;chaperone binding;protein homodimerization activity
3	3.74851	37.2854	LmjF.06.1280	0.242065	0	0	0.169	0.073	protoporphyrinogen oxidase-like protein	N/A
3	3.74851	37.2854	LmjF.36.0190	0.241802	4.08668e-83	8.17337e-80	0.999	0.97	elongation factor 2	GTP binding;GTPase activity
3	3.74851	37.2854	LmjF.15.0660	0.240256	1.8381e-13	3.6762e-10	0.408	0.193	hypothetical protein, conserved	N/A
3	3.74851	37.2854	LmjF.35.0180	0.238288	7.2934e-187	1.45868e-183	0.251	0.114	hypothetical protein, conserved	N/A
3	3.74851	37.2854	LmjF.20.1620	0.238132	0	0	0.168	0.079	CHORD, putative	N/A
3	3.74851	37.2854	LmjF.07.0790	0.237513	1.24328e-08	2.48656e-05	0.465	0.235	hypothetical protein, conserved	N/A
3	3.74851	37.2854	LmjF.28.2560	0.235392	8.37543e-30	1.67509e-26	0.985	0.793	40S ribosomal protein S17, putative	structural constituent of ribosome
3	3.74851	37.2854	LmjF.32.0760	0.235107	5.39476e-66	1.07895e-62	0.501	0.12	cyclin 9, putative	cyclin-dependent protein serine/threonine kinase regulator activity
3	3.74851	37.2854	LmjF.26.2710	0.233647	0	0	0.117	0.043	glutamate 5-kinase, putative	glutamate 5-kinase activity
3	3.74851	37.2854	LmjF.08.1100	0.232602	6.4773e-256	1.29546e-252	0.235	0.126	hypothetical protein, conserved	N/A
3	3.74851	37.2854	LmjF.36.0230	0.231763	3.10439e-103	6.20878e-100	0.314	0.159	peptidyl-prolyl cis-trans isomerase, putative	peptidyl-prolyl cis-trans isomerase activity
3	3.74851	37.2854	LmjF.05.1050	0.231654	4.88737e-121	9.77473e-118	0.303	0.146	hypothetical protein, unknown function	N/A
3	3.74851	37.2854	LmjF.04.0560	0.231606	9.25664e-59	1.85133e-55	0.684	0.346	lipid-like atypical dual specificity phosphatase, putative	phosphatase activity;protein tyrosine phosphatase activity
3	3.74851	37.2854	LmjF.36.6620	0.230028	2.67855e-161	5.3571e-158	0.293	0.162	hypothetical protein, conserved	N/A
3	3.74851	37.2854	LmjF.29.1860	0.22789	1.83248e-38	3.66497e-35	0.325	0.113	hypothetical protein, conserved	N/A
3	3.74851	37.2854	LmjF.22.0260	0.226595	3.78557e-71	7.57114e-68	0.658	0.303	translocon-associated protein (TRAP), alpha subunit, putative	N/A
3	3.74851	37.2854	LmjF.36.6710	0.226007	2.10102e-68	4.20203e-65	0.633	0.284	replication factor C subunit 3, putative	DNA binding
3	3.74851	37.2854	LmjF.36.1955	0.225693	1.63243e-60	3.26487e-57	0.346	0.161	TLD, putative	N/A
3	3.74851	37.2854	LmjF.04.0035	0.225366	2.22458e-281	4.44915e-278	0.165	0.064	hypothetical protein	N/A
3	3.74851	37.2854	LmjF.27.2335	0.225261	0	0	0.215	0.118	hypothetical protein, conserved	N/A
3	3.74851	37.2854	LmjF.31.1620	0.223843	2.36549e-84	4.73098e-81	0.306	0.134	Protein of unknown function DUF84, putative	N/A
3	3.74851	37.2854	LmjF.36.3657	0.223515	1.92504e-164	3.85009e-161	0.651	0.218	Protein of unknown function (DUF1619), putative	N/A
3	3.74851	37.2854	LmjF.32.3780	0.223145	8.29887e-206	1.65977e-202	0.291	0.18	kinetoplast-associated protein 3, putative	N/A
3	3.74851	37.2854	LmjF.13.1660	0.222785	1.6766e-17	3.35319e-14	0.651	0.378	chaperonin TCP20, putative	ATP binding;unfolded protein binding
3	3.74851	37.2854	LmjF.19.0190	0.222775	1.66029e-244	3.32058e-241	0.789	0.354	multiprotein-bridging factor 1, putative	DNA binding
3	3.74851	37.2854	LmjF.31.2250	0.221587	4.19252e-188	8.38504e-185	0.266	0.137	3,2-trans-enoyl-CoA isomerase, mitochondrial precursor, putative	catalytic activity
3	3.74851	37.2854	LmjF.35.3800	0.221462	3.081e-72	6.16199e-69	0.963	0.666	60S ribosomal protein L23, putative	structural constituent of ribosome
3	3.74851	37.2854	LmjF.10.0870	0.221339	9.17458e-246	1.83492e-242	0.872	0.426	histone H3	DNA binding;protein heterodimerization activity
3	3.74851	37.2854	LmjF.29.1500	0.220998	7.77566e-38	1.55513e-34	0.916	0.702	Nodulin-like, putative	N/A
3	3.74851	37.2854	LmjF.32.1420	0.219289	0	0	0.113	0.054	hypothetical protein, conserved	N/A
3	3.74851	37.2854	LmjF.31.1440	0.218909	2.74617e-43	5.49235e-40	0.73	0.41	hypothetical protein, unknown function (pseudogene)	N/A
3	3.74851	37.2854	LmjF.04.1000	0.217125	0	0	0.807	0.297	Voltage-gated Chloride channel Like 1, putative	voltage-gated chloride channel activity
3	3.74851	37.2854	LmjF.36.7000	0.216848	2.77331e-83	5.54662e-80	0.314	0.139	PSP1 C-terminal conserved region, putative	N/A
3	3.74851	37.2854	LmjF.22.0050	0.21666	6.26531e-293	1.25306e-289	0.193	0.084	hypothetical protein, conserved	N/A
3	3.74851	37.2854	LmjF.34.2580	0.216514	5.48376e-41	1.09675e-37	1	0.949	ALBA-domain protein 3	nucleic acid binding
3	3.74851	37.2854	LmjF.25.1015	0.215803	3.47027e-26	6.94054e-23	0.429	0.237	protein transport protein Sec61 gamma subunit, putative	P-P-bond-hydrolysis-driven protein transmembrane transporter activity
3	3.74851	37.2854	LmjF.27.1970	0.214347	0	0	0.698	0.183	small nuclear ribonucleoprotein protein, putative	N/A
3	3.74851	37.2854	LmjF.04.0950	0.213015	9.51212e-24	1.90242e-20	0.999	0.944	60S ribosomal protein L10, putative	structural constituent of ribosome
3	3.74851	37.2854	LmjF.33.2060	0.210606	1.63664e-153	3.27327e-150	0.779	0.372	hypothetical protein, conserved	N/A
3	3.74851	37.2854	LmjF.36.4670	0.210573	0	0	0.745	0.249	hypothetical protein, conserved	N/A
3	3.74851	37.2854	LmjF.23.0547	0.210338	3.61118e-136	7.22236e-133	0.26	0.111	hypothetical protein, conserved	N/A
3	3.74851	37.2854	LmjF.36.0930	0.209831	2.27673e-26	4.55347e-23	0.809	0.549	40S ribosomal protein S18, putative	RNA binding;nucleic acid binding;structural constituent of ribosome
3	3.74851	37.2854	LmjF.31.0260	0.209527	0	0	0.126	0.054	hypothetical protein, conserved	N/A
3	3.74851	37.2854	LmjF.24.1520	0.208486	2.97466e-23	5.94931e-20	0.546	0.22	ERCC4 domain containing protein, putative	DNA binding;nuclease activity
3	3.74851	37.2854	LmjF.21.1700	0.207965	7.94592e-90	1.58918e-86	0.692	0.326	proteasome alpha 2 subunit, putative	N/A
3	3.74851	37.2854	LmjF.04.0040	0.20728	2.27589e-15	4.55178e-12	0.427	0.229	hypothetical protein	N/A
3	3.74851	37.2854	LmjF.35.4550	0.207006	7.13441e-13	1.42688e-09	0.482	0.273	hypothetical protein, conserved	protein binding
3	3.74851	37.2854	LmjF.31.0920	0.20695	3.94823e-90	7.89645e-87	0.327	0.184	sodium stibogluconate resistance protein, putative	N/A
3	3.74851	37.2854	LmjF.15.1545	0.205989	0	0	0.19	0.093	hypothetical protein, conserved	N/A
3	3.74851	37.2854	LmjF.31.3140	0.205576	1.99624e-209	3.99247e-206	0.248	0.135	hypothetical protein, conserved	N/A
3	3.74851	37.2854	LmjF.27.0090	0.205409	7.92754e-11	1.58551e-07	0.475	0.157	cytochrome p450-like protein	heme binding;iron ion binding;monooxygenase activity;oxidoreductase activity, acting on paired donors, with incorporation or reduction of molecular oxygen
3	3.74851	37.2854	LmjF.21.1720	0.205265	2.1469e-14	4.2938e-11	0.653	0.386	60S ribosomal protein L32	structural constituent of ribosome
3	3.74851	37.2854	LmjF.36.2730	0.204832	3.54757e-33	7.09513e-30	0.471	0.123	D-tyrosyl-tRNA deacylase, putative	D-aminoacyl-tRNA deacylase activity;aminoacyl-tRNA editing activity
3	3.74851	37.2854	LmjF.32.0020	0.204608	2.99884e-13	5.99769e-10	0.57	0.275	nuclear segregation protein, putative	N/A
3	3.74851	37.2854	LmjF.01.0730	0.204158	0	0	0.159	0.083	Meckel syndrome type 6 protein, putative	N/A
3	3.74851	37.2854	LmjF.36.5010	0.202862	8.85757e-28	1.77151e-24	0.994	0.841	40S ribosomal protein SA, putative	structural constituent of ribosome
3	3.74851	37.2854	LmjF.35.2010	0.202238	3.9472e-34	7.89439e-31	0.99	0.814	40S ribosomal protein S6, putative	structural constituent of ribosome
3	3.74851	37.2854	LmjF.12.1060	0.201987	0	0	0.119	0.046	surface antigen protein, putative	N/A
3	3.74851	37.2854	LmjF.36.5180	0.201671	1.57286e-73	3.14572e-70	0.346	0.187	aldehyde dehydrogenase, putative	oxidoreductase activity;oxidoreductase activity, acting on the aldehyde or oxo group of donors, NAD or NADP as acceptor
3	3.74851	37.2854	LmjF.12.0690	0.201663	1.47213e-19	2.94425e-16	0.534	0.218	hypothetical protein, conserved	N/A
3	3.74851	37.2854	LmjF.18.1190	0.201175	0	0	0.155	0.069	hypothetical protein, conserved	N/A
3	3.74851	37.2854	LmjF.35.0900	0.200825	4.69782e-130	9.39564e-127	0.296	0.159	hypothetical protein, conserved	N/A
3	3.74851	37.2854	LmjF.24.0460	0.20066	5.11197e-14	1.02239e-10	0.514	0.202	ubiquitin-activating enzyme, putative	ubiquitin-like modifier activating enzyme activity
3	3.74851	37.2854	LmjF.31.0810	0.200441	3.49938e-238	6.99877e-235	0.212	0.107	hypothetical protein, conserved	N/A
3	3.74851	37.2854	LmjF.03.0960	0.199287	1.64638e-71	3.29276e-68	0.708	0.365	hypothetical protein, conserved	N/A
3	3.74851	37.2854	LmjF.08.0890	0.198942	5.53913e-10	1.10783e-06	0.558	0.273	mitochondrial DNA polymerase beta	DNA binding;DNA polymerase activity;DNA-directed DNA polymerase activity
3	3.74851	37.2854	LmjF.06.1060	0.19837	0	0	0.152	0.069	2OG-Fe(II) oxygenase superfamily, putative	oxidoreductase activity
3	3.74851	37.2854	LmjF.31.1960	0.198323	1.99184e-55	3.98367e-52	0.561	0.201	tryparedoxin 3, putative	N/A
3	3.74851	37.2854	LmjF.24.1400	0.197834	0	0	0.827	0.349	hypothetical protein, conserved	N/A
3	3.74851	37.2854	LmjF.36.5700	0.197479	1.75483e-87	3.50966e-84	0.548	0.157	hypothetical protein, conserved	N/A
3	3.74851	37.2854	LmjF.36.2140	0.196462	3.94732e-93	7.89463e-90	0.647	0.288	hypothetical protein, conserved	N/A
3	3.74851	37.2854	LmjF.35.1250	0.196171	9.83554e-14	1.96711e-10	0.395	0.148	monothiol glutaredoxin, putative	protein disulfide oxidoreductase activity
3	3.74851	37.2854	LmjF.23.1610	0.196161	6.25724e-69	1.25145e-65	0.334	0.135	hypothetical protein, conserved	N/A
3	3.74851	37.2854	LmjF.34.2700	0.196083	1.01891e-104	2.03783e-101	0.347	0.216	eukaryotic translation initiation factor 3 subunit g	nucleic acid binding;translation initiation factor activity
3	3.74851	37.2854	LmjF.36.4420	0.195999	4.4937e-39	8.98741e-36	0.897	0.633	60S ribosomal protein L22, putative	structural constituent of ribosome
3	3.74851	37.2854	LmjF.30.0800	0.195338	2.82958e-79	5.65915e-76	0.32	0.147	rac serine-threonine kinase, putative	ATP binding;protein kinase activity;protein serine/threonine kinase activity
3	3.74851	37.2854	LmjF.36.3830	0.195291	1.00122e-15	2.00245e-12	0.409	0.187	Zinc finger, C3HC4 type (RING finger), putative	N/A
3	3.74851	37.2854	LmjF.34.4200	0.195096	5.19571e-72	1.03914e-68	0.537	0.157	hypothetical protein, unknown function	N/A
3	3.74851	37.2854	LmjF.35.4440	0.194842	1.54581e-42	3.09162e-39	0.412	0.237	hypothetical protein, conserved	N/A
3	3.74851	37.2854	LmjF.11.0970	0.194805	6.82613e-36	1.36523e-32	0.926	0.7	40S ribosomal protein S5	structural constituent of ribosome
3	3.74851	37.2854	LmjF.28.0590	0.193316	1.37754e-37	2.75508e-34	0.382	0.196	hypothetical protein, unknown function	N/A
3	3.74851	37.2854	LmjF.35.4750	0.192636	0	0	0.835	0.323	glyceraldehyde-3-phosphate dehydrogenase-like protein	NAD binding;oxidoreductase activity, acting on the aldehyde or oxo group of donors, NAD or NADP as acceptor
3	3.74851	37.2854	LmjF.33.0680	0.192474	2.25945e-32	4.51889e-29	0.362	0.161	sterol C-24 reductase, putative	oxidoreductase activity, acting on the CH-CH group of donors, NAD or NADP as acceptor
3	3.74851	37.2854	LmjF.31.2680	0.192454	0	0	0.155	0.062	hypothetical protein, unknown function	N/A
3	3.74851	37.2854	LmjF.26.2610	0.19198	1.91931e-101	3.83863e-98	0.241	0.074	FAD binding domain containing protein, putative	FAD binding
3	3.74851	37.2854	LmjF.31.1700	0.191622	4.44975e-191	8.89949e-188	0.223	0.116	hypothetical protein, conserved	protein binding
3	3.74851	37.2854	LmjF.05.0460	0.191069	3.57721e-44	7.15442e-41	0.332	0.125	GTPase, putative	GTP binding
3	3.74851	37.2854	LmjF.25.0740	0.190596	6.00849e-46	1.2017e-42	0.541	0.188	DNA repair protein, putative	ATP binding;DNA binding;zinc ion binding
3	3.74851	37.2854	LmjF.21.1760	0.189635	7.33611e-06	0.0146722	0.51	0.295	centromere/microtubule binding protein cbf5, putative	RNA binding;pseudouridine synthase activity
3	3.74851	37.2854	LmjF.27.2370	0.189622	0	0	0.153	0.085	hypothetical protein, conserved	N/A
3	3.74851	37.2854	LmjF.18.0740	0.188728	2.43573e-173	4.87147e-170	0.807	0.405	Elongation factor Tu, mitochondrial, putative	GTP binding;GTPase activity
3	3.74851	37.2854	LmjF.29.0080	0.188108	9.99157e-26	1.99831e-22	0.448	0.102	hypothetical protein, conserved	N/A
3	3.74851	37.2854	LmjF.36.5920	0.188028	2.02191e-36	4.04382e-33	0.627	0.314	kinetoplast DNA-associated protein, putative	N/A
3	3.74851	37.2854	LmjF.27.2330	0.187673	8.16211e-143	1.63242e-139	0.315	0.173	GTP binding protein, putative	GTP binding
3	3.74851	37.2854	LmjF.34.2830	0.187115	6.62385e-156	1.32477e-152	0.572	0.14	ubiquitin related modifier (urm1)-like protein	N/A
3	3.74851	37.2854	LmjF.36.0060	0.186456	1.36074e-243	2.72149e-240	0.725	0.281	L-ribulokinase, putative	ATP binding;phosphotransferase activity, alcohol group as acceptor;ribulokinase activity
3	3.74851	37.2854	LmjF.36.6480	0.186162	1.0323e-197	2.06461e-194	0.947	0.533	histidine secretory acid phosphatase, putative	N/A
3	3.74851	37.2854	LmjF.36.5365	0.184443	3.64367e-294	7.28733e-291	0.255	0.173	hypothetical protein, conserved	protein binding
3	3.74851	37.2854	LmjF.36.6870	0.183457	5.90968e-103	1.18194e-99	0.315	0.162	EVE domain containing protein, putative	N/A
3	3.74851	37.2854	LmjF.33.0960	0.183145	3.67968e-34	7.35937e-31	0.477	0.113	nicotinate phosphoribosyltransferase, putative	nicotinate phosphoribosyltransferase activity;nicotinate-nucleotide diphosphorylase (carboxylating) activity
3	3.74851	37.2854	LmjF.35.3440	0.182849	0	0	0.835	0.355	replication factor A protein 3, putative	DNA binding
3	3.74851	37.2854	LmjF.32.3910	0.182639	1.97366e-255	3.94733e-252	0.172	0.069	Endoplasmic Reticulum-Golgi Intermediate Compartment (ERGIC)/Endoplasmic reticulum vesicle transporter, putative	N/A
3	3.74851	37.2854	LmjF.05.0880	0.182341	3.13194e-287	6.26388e-284	0.872	0.414	hypothetical protein, conserved	N/A
3	3.74851	37.2854	LmjF.13.0560	0.182169	3.16767e-69	6.33534e-66	0.96	0.649	60S ribosomal protein L18, putative	structural constituent of ribosome
3	3.74851	37.2854	LmjF.21.1800	0.182058	3.18178e-07	0.000636355	0.468	0.159	vacuolar ATP synthase, putative	proton transmembrane transporter activity
3	3.74851	37.2854	LmjF.05.1200	0.181889	3.47582e-30	6.95164e-27	0.347	0.12	prefoldin subunit, putative	unfolded protein binding
3	3.74851	37.2854	LmjF.36.0990	0.181857	1.4968e-31	2.99359e-28	0.802	0.524	40S ribosomal protein S10, putative	N/A
3	3.74851	37.2854	LmjF.34.3980	0.181475	8.07878e-46	1.61576e-42	0.391	0.222	nucleolar protein family a member-like protein	N/A
3	3.74851	37.2854	LmjF.04.1165	0.181324	2.11338e-194	4.22677e-191	0.213	0.1	hypothetical protein	N/A
3	3.74851	37.2854	LmjF.31.2930	0.181232	0	0	0.114	0.049	hypothetical protein, conserved	N/A
3	3.74851	37.2854	LmjF.28.0600	0.180245	8.47229e-176	1.69446e-172	0.649	0.223	hypothetical protein, conserved	N/A
3	3.74851	37.2854	LmjF.36.1080	0.180218	2.34054e-26	4.68109e-23	0.283	0.048	hypothetical protein, conserved	N/A
3	3.74851	37.2854	LmjF.31.0100	0.180153	6.63336e-60	1.32667e-56	0.654	0.304	O-sialoglycoprotein endopeptidase, putative	N/A
3	3.74851	37.2854	LmjF.35.0350	0.179933	8.70774e-17	1.74155e-13	0.402	0.178	hypothetical protein, conserved	N/A
3	3.74851	37.2854	LmjF.33.2850	0.179489	8.73128e-117	1.74626e-113	0.188	0.033	cysteine peptidase, Clan CA, family C51, putative	N/A
3	3.74851	37.2854	LmjF.14.0590	0.179431	5.61211e-37	1.12242e-33	0.388	0.181	hypothetical protein, conserved	N/A
3	3.74851	37.2854	LmjF.12.0290	0.179105	8.6159e-284	1.72318e-280	0.254	0.166	hypothetical protein, unknown function	N/A
3	3.74851	37.2854	LmjF.14.0870	0.17881	3.5156e-95	7.0312e-92	0.332	0.171	hypothetical protein, conserved	N/A
3	3.74851	37.2854	LmjF.27.1400	0.178323	2.16567e-190	4.33134e-187	0.196	0.083	hypothetical protein, conserved	N/A
3	3.74851	37.2854	LmjF.04.1190	0.178066	6.99549e-50	1.3991e-46	0.378	0.19	tRNA nucleotidyltransferase, putative	RNA binding;nucleotidyltransferase activity
3	3.74851	37.2854	LmjF.30.0770	0.177885	2.18218e-263	4.36435e-260	0.727	0.256	hypothetical protein, conserved	N/A
3	3.74851	37.2854	LmjF.35.1270	0.177768	0	0	0.108	0.059	hypothetical protein, conserved	N/A
3	3.74851	37.2854	LmjF.36.1850	0.177618	1.13475e-79	2.26951e-76	0.582	0.199	DEAD box RNA helicase, putative	ATP binding;helicase activity;nucleic acid binding
3	3.74851	37.2854	LmjF.22.0120	0.177362	0	0	0.834	0.314	hypothetical protein, conserved	N/A
3	3.74851	37.2854	LmjF.06.0830	0.175748	1.30935e-11	2.6187e-08	0.653	0.381	lipin, putative	N/A
3	3.74851	37.2854	LmjF.27.2270	0.174702	6.01151e-181	1.2023e-177	0.725	0.306	hypothetical protein, conserved	N/A
3	3.74851	37.2854	LmjF.35.5230	0.174028	0	0	0.805	0.34	tRNA (guanine-N(7)-)-methyltransferase, putative	tRNA (guanine-N7-)-methyltransferase activity
3	3.74851	37.2854	LmjF.27.1000	0.173517	4.27433e-20	8.54866e-17	0.39	0.167	TatD related DNase, putative	hydrolase activity, acting on ester bonds
3	3.74851	37.2854	LmjF.11.0960	0.173149	3.27219e-26	6.54439e-23	0.833	0.576	40S ribosomal protein S5	structural constituent of ribosome
3	3.74851	37.2854	LmjF.35.4470	0.173119	8.53486e-36	1.70697e-32	0.912	0.668	Co-chaperone protein P23	N/A
3	3.74851	37.2854	LmjF.15.0040	0.172816	8.24139e-157	1.64828e-153	0.729	0.325	Possible lysine decarboxylase, putative	N/A
3	3.74851	37.2854	LmjF.15.0230	0.172452	8.82435e-49	1.76487e-45	0.425	0.274	lysyl-tRNA synthetase, putative	ATP binding;aminoacyl-tRNA ligase activity;lysine-tRNA ligase activity;nucleic acid binding;nucleotide binding
3	3.74851	37.2854	LmjF.18.0890	0.17208	0	0	0.835	0.327	rab7 GTP binding protein, putative	GTP binding;GTPase activity
3	3.74851	37.2854	LmjF.19.1000	0.17126	1.57826e-173	3.15653e-170	0.216	0.069	glycerol uptake protein, putative	N/A
3	3.74851	37.2854	LmjF.31.0270	0.170662	1.60479e-262	3.20958e-259	0.176	0.078	2OG-Fe(II) oxygenase superfamily, putative	L-ascorbic acid binding;iron ion binding;oxidoreductase activity;oxidoreductase activity, acting on paired donors, with incorporation or reduction of molecular oxygen
3	3.74851	37.2854	LmjF.36.1570	0.170139	0	0	0.723	0.165	hypothetical protein, conserved	N/A
3	3.74851	37.2854	LmjF.22.1560	0.170103	0	0	0.202	0.113	60S ribosomal protein L14, putative	RNA binding;structural constituent of ribosome
3	3.74851	37.2854	LmjF.26.1150	0.170031	3.36834e-20	6.73667e-17	0.497	0.167	hypothetical protein, conserved	N/A
3	3.74851	37.2854	LmjF.04.0170	0.169588	1.57182e-81	3.14363e-78	0.519	0.131	hypothetical protein, conserved in leishmania	N/A
3	3.74851	37.2854	LmjF.09.0050	0.169232	8.81237e-40	1.76247e-36	0.589	0.251	endonuclease III, putative	4 iron, 4 sulfur cluster binding;DNA N-glycosylase activity;DNA binding;DNA-(apurinic or apyrimidinic site) endonuclease activity;catalytic activity
3	3.74851	37.2854	LmjF.07.0450	0.16916	0	0	0.141	0.074	hypothetical protein, conserved	N/A
3	3.74851	37.2854	LmjF.31.0140	0.168737	1.38365e-24	2.7673e-21	0.407	0.206	ubiquitin carboxyl-terminal hydrolase, putative	protein binding;thiol-dependent ubiquitin-specific protease activity
3	3.74851	37.2854	LmjF.23.0200	0.168672	1.71061e-23	3.42121e-20	0.614	0.298	endoribonuclease L-PSP (pb5), putative	N/A
3	3.74851	37.2854	LmjF.31.2410	0.168431	3.65662e-52	7.31325e-49	0.596	0.244	hypothetical protein, unknown function	N/A
3	3.74851	37.2854	LmjF.18.1580	0.167798	0	0	0.84	0.309	nonspecific nucleoside hydrolase	hydrolase activity, hydrolyzing N-glycosyl compounds
3	3.74851	37.2854	LmjF.31.0680	0.167109	4.47302e-55	8.94604e-52	0.772	0.446	C2 domain containing protein, putative	N/A
3	3.74851	37.2854	LmjF.19.0420	0.166637	2.00585e-99	4.0117e-96	0.547	0.147	DNA-directed RNA polymerase III subunit C11, putative	nucleic acid binding;zinc ion binding
3	3.74851	37.2854	LmjF.31.3030	0.166032	3.3209e-150	6.6418e-147	0.299	0.128	hypothetical protein, unknown function	N/A
3	3.74851	37.2854	LmjF.30.1550	0.165897	3.57111e-300	7.14221e-297	0.7	0.221	pseudouridine synthase A-like protein, putative	RNA binding;pseudouridine synthase activity
3	3.74851	37.2854	LmjF.27.0290	0.164753	3.72444e-14	7.44888e-11	0.437	0.207	acyl carrier protein, mitochondrial, putative	N/A
3	3.74851	37.2854	LmjF.17.0370	0.164105	5.00447e-271	1.00089e-267	0.197	0.095	hypothetical protein, unknown function	N/A
3	3.74851	37.2854	LmjF.31.2490	0.164031	5.18915e-129	1.03783e-125	0.279	0.121	ferredoxin, 2fe-2s-like protein	2 iron, 2 sulfur cluster binding;electron transfer activity;iron-sulfur cluster binding
3	3.74851	37.2854	LmjF.36.1310	0.16379	8.04456e-193	1.60891e-189	0.677	0.263	hypothetical protein, conserved	N/A
3	3.74851	37.2854	LmjF.29.2350	0.163162	1.30915e-260	2.61831e-257	0.239	0.138	Ubiquinone biosynthesis protein COQ7, putative	monooxygenase activity
3	3.74851	37.2854	LmjF.35.0140	0.161766	4.25952e-26	8.51905e-23	0.638	0.342	hypothetical protein, conserved	N/A
3	3.74851	37.2854	LmjF.17.0640	0.161633	0	0	0.714	0.195	VID27 cytoplasmic protein, putative	protein binding
3	3.74851	37.2854	LmjF.16.0790	0.161317	6.52392e-89	1.30478e-85	0.308	0.144	chitinase	chitin binding
3	3.74851	37.2854	LmjF.07.1160	0.161161	2.19004e-08	4.38008e-05	0.999	0.943	amino acid transporter 19, putative	N/A
3	3.74851	37.2854	LmjF.03.0190	0.161128	6.04647e-20	1.20929e-16	0.584	0.28	U2 splicing auxiliary factor, putative	RNA binding;metal ion binding;nucleic acid binding
3	3.74851	37.2854	LmjF.05.1040	0.16089	4.04218e-110	8.08436e-107	0.342	0.19	stomatin-like protein	N/A
3	3.74851	37.2854	LmjF.26.0190	0.160356	1.34704e-286	2.69407e-283	0.195	0.12	Scaffold protein Nfu/NifU N terminal/NifU-like domain containing protein, putative	iron ion binding;iron-sulfur cluster binding
3	3.74851	37.2854	LmjF.07.0800	0.159889	2.60791e-179	5.21582e-176	0.776	0.343	flavoprotein subunit-like protein	heme binding
3	3.74851	37.2854	LmjF.35.0110	0.159651	4.92449e-32	9.84899e-29	0.382	0.182	coatomer subunit zeta, putative	N/A
3	3.74851	37.2854	LmjF.30.2850	0.159647	2.9962e-76	5.99239e-73	0.728	0.375	hypothetical protein, conserved	N/A
3	3.74851	37.2854	LmjF.16.0690	0.159241	6.9266e-92	1.38532e-88	0.313	0.155	eukaryotic translation initiation factor eIF2A, putative	translation initiation factor activity
3	3.74851	37.2854	LmjF.21.0780	0.158938	1.7815e-55	3.563e-52	0.313	0.118	hypothetical protein, conserved	N/A
3	3.74851	37.2854	LmjF.11.0020	0.158933	5.48982e-190	1.09796e-186	0.241	0.119	Endoplasmic Reticulum-Golgi Intermediate Compartment (ERGIC)/Endoplasmic reticulum vesicle transporter, putative	N/A
3	3.74851	37.2854	LmjF.20.0190	0.158699	6.66072e-95	1.33214e-91	0.569	0.183	hypothetical protein, unknown function	N/A
3	3.74851	37.2854	LmjF.10.1210	0.158388	1.4918e-173	2.9836e-170	0.61	0.165	hypothetical protein, conserved	N/A
3	3.74851	37.2854	LmjF.36.5390	0.157954	9.24592e-131	1.84918e-127	0.653	0.245	phosphoribosylpyrophosphate synthetase, putative	magnesium ion binding;ribose phosphate diphosphokinase activity
3	3.74851	37.2854	LmjF.12.1340	0.157658	0	0	0.704	0.222	hypothetical protein, conserved	N/A
3	3.74851	37.2854	LmjF.23.0130	0.157388	3.58349e-38	7.16699e-35	0.45	0.083	vacuolar type h+ ATPase subunit, putative	proton transmembrane transporter activity
3	3.74851	37.2854	LmjF.35.4730	0.15601	0	0	0.791	0.269	hypothetical protein	N/A
3	3.74851	37.2854	LmjF.20.0890	0.155745	6.94716e-11	1.38943e-07	0.377	0.132	Transcription elongation factor 1 domain-containing protein	N/A
3	3.74851	37.2854	LmjF.31.1580	0.155591	0	0	0.898	0.393	hypothetical protein, conserved	N/A
3	3.74851	37.2854	LmjF.14.0240	0.154695	4.86961e-12	9.73921e-09	0.382	0.137	HIT domain containing protein, putative	catalytic activity
3	3.74851	37.2854	LmjF.36.6140	0.153809	1.76894e-28	3.53788e-25	0.326	0.112	hypothetical protein, conserved	N/A
3	3.74851	37.2854	LmjF.16.0540	0.153522	5.32903e-189	1.06581e-185	0.264	0.146	aspartate carbamoyltransferase, putative	amino acid binding;aspartate carbamoyltransferase activity;carboxyl- or carbamoyltransferase activity
3	3.74851	37.2854	LmjF.16.0140	0.15315	2.3957e-204	4.7914e-201	0.222	0.115	eukaryotic translation initiation factor 1A, putative	RNA binding;translation initiation factor activity
3	3.74851	37.2854	LmjF.35.4580	0.153047	0	0	0.19	0.108	60Kd inner membrane protein, putative	membrane insertase activity
3	3.74851	37.2854	LmjF.18.0120	0.152979	7.20626e-308	1.44125e-304	0.717	0.234	ADP-ribosylation factor-like protein 2-binding protein, putative	N/A
3	3.74851	37.2854	LmjF.31.2390	0.152755	6.92726e-242	1.38545e-238	0.896	0.455	zinc transporter, putative	cation transmembrane transporter activity
3	3.74851	37.2854	LmjF.21.1780	0.152229	9.04381e-83	1.80876e-79	0.837	0.487	40S ribosomal protein S6, putative	structural constituent of ribosome
3	3.74851	37.2854	LmjF.06.0410	0.151814	0	0	0.112	0.051	60S ribosomal protein L19, putative	RNA binding;structural constituent of ribosome
3	3.74851	37.2854	LmjF.26.0330	0.151474	5.39096e-119	1.07819e-115	0.343	0.21	mitotic cyclin, putative	N/A
3	3.74851	37.2854	LmjF.30.0690	0.150703	7.46427e-184	1.49285e-180	0.285	0.162	40S ribosomal protein S30, putative	structural constituent of ribosome
3	3.74851	37.2854	LmjF.36.0065	0.150702	1.7194e-09	3.43879e-06	0.487	0.175	SAP domain containing protein, putative	N/A
3	3.74851	37.2854	LmjF.31.1165	0.149727	6.88034e-136	1.37607e-132	0.281	0.143	hypothetical protein	N/A
3	3.74851	37.2854	LmjF.19.0140	0.149646	4.22678e-204	8.45357e-201	0.783	0.347	Associated kinase of Tb14-3-3, putative	ATP binding;protein kinase activity
3	3.74851	37.2854	LmjF.33.0970	0.149574	0	0	0.728	0.23	hypothetical protein, conserved	N/A
3	3.74851	37.2854	LmjF.07.0360	0.149475	0	0	0.89	0.371	Protein of unknown function (DUF1674), putative	N/A
3	3.74851	37.2854	LmjF.36.2610	0.149041	1.62248e-244	3.24496e-241	0.704	0.234	folylpolyglutamate synthetase	ATP binding;ligase activity;tetrahydrofolylpolyglutamate synthase activity
3	3.74851	37.2854	LmjF.36.0280	0.148901	6.7206e-40	1.34412e-36	0.544	0.206	hypothetical protein, conserved	N/A
3	3.74851	37.2854	LmjF.19.1600	0.148594	0	0	0.655	0.157	SRP19 protein, putative	7S RNA binding
3	3.74851	37.2854	LmjF.05.0010	0.14853	4.76033e-70	9.52066e-67	0.344	0.159	hypothetical protein, conserved	N/A
3	3.74851	37.2854	LmjF.21.1860	0.148492	9.87334e-19	1.97467e-15	0.919	0.743	beta tubulin	GTP binding;GTPase activity;structural constituent of cytoskeleton
3	3.74851	37.2854	LmjF.30.0730	0.148328	6.6278e-240	1.32556e-236	0.802	0.355	co-chaperone GrpE, putative	adenyl-nucleotide exchange factor activity;chaperone binding;protein homodimerization activity
3	3.74851	37.2854	LmjF.07.0420	0.148325	1.75531e-147	3.51062e-144	0.666	0.264	hypothetical protein, conserved	N/A
3	3.74851	37.2854	LmjF.28.2420	0.147787	1.40911e-261	2.81822e-258	0.861	0.409	2-oxoglutarate dehydrogenase, E2 component, dihydrolipoamide succinyltransferase, putative	transferase activity, transferring acyl groups
3	3.74851	37.2854	LmjF.05.1130	0.147336	1.12811e-79	2.25622e-76	0.32	0.133	hypothetical protein, conserved	N/A
3	3.74851	37.2854	LmjF.07.0100	0.14703	9.55156e-224	1.91031e-220	0.249	0.126	metallo-peptidase, Clan ME, Family M16C	metal ion binding
3	3.74851	37.2854	LmjF.10.1050	0.146898	6.41237e-07	0.00128247	0.503	0.204	DnaJ domain containing protein, putative	N/A
3	3.74851	37.2854	LmjF.36.0200	0.146724	5.35197e-11	1.07039e-07	0.446	0.235	mitochondrial inner membrane signal peptidase, putative	serine-type endopeptidase activity;serine-type peptidase activity
3	3.74851	37.2854	LmjF.27.1980	0.146435	6.12546e-205	1.22509e-201	0.252	0.139	FtsJ cell division protein, putative	methyltransferase activity;rRNA methyltransferase activity
3	3.74851	37.2854	LmjF.31.2850	0.144995	9.63591e-270	1.92718e-266	0.223	0.128	ribosomal protein l7/l12-like protein	structural constituent of ribosome
3	3.74851	37.2854	LmjF.36.3580	0.144195	1.33129e-18	2.66257e-15	0.548	0.238	Protein of unknown function (DUF2009), putative	N/A
3	3.74851	37.2854	LmjF.15.0950	0.143616	1.54902e-23	3.09804e-20	0.965	0.763	40S ribosomal protein S3, putative	RNA binding;structural constituent of ribosome
3	3.74851	37.2854	LmjF.34.0740	0.143572	5.33868e-26	1.06774e-22	0.467	0.119	CBF/Mak21 family, putative	N/A
3	3.74851	37.2854	LmjF.17.0430	0.142701	3.6376e-35	7.2752e-32	0.614	0.286	hypothetical protein, conserved	N/A
3	3.74851	37.2854	LmjF.02.0450	0.141906	7.02801e-53	1.4056e-49	0.705	0.373	voltage-dependent anion-selective channel, putative	voltage-gated anion channel activity
3	3.74851	37.2854	LmjF.23.1590	0.14188	0	0	0.133	0.076	oxidoreductase-like protein	oxidoreductase activity
3	3.74851	37.2854	LmjF.03.0130	0.141129	3.61554e-87	7.23108e-84	0.594	0.208	acetyltransferase, putative	N-acetyltransferase activity
3	3.74851	37.2854	LmjF.10.0120	0.140988	7.09959e-216	1.41992e-212	0.679	0.239	PSP1 C-terminal conserved region, putative	N/A
3	3.74851	37.2854	LmjF.16.0520	0.140886	3.00178e-97	6.00357e-94	0.363	0.22	hypothetical protein, conserved	N/A
3	3.74851	37.2854	LmjF.30.0880	0.140533	9.76993e-63	1.95399e-59	0.407	0.255	adenosine kinase, putative	adenosine kinase activity
3	3.74851	37.2854	LmjF.24.0750	0.140394	7.7703e-157	1.55406e-153	0.643	0.232	hypothetical protein, conserved	N/A
3	3.74851	37.2854	LmjF.31.0255	0.140387	1.6876e-73	3.37519e-70	0.344	0.179	hypothetical protein, conserved	N/A
3	3.74851	37.2854	LmjF.26.1015	0.140309	0	0	0.829	0.299	hypothetical protein	N/A
3	3.74851	37.2854	LmjF.15.0780	0.14018	1.15783e-305	2.31566e-302	0.204	0.132	hypothetical protein, conserved	N/A
3	3.74851	37.2854	LmjF.36.6630	0.139916	4.24149e-278	8.48298e-275	0.158	0.076	RNA editing complex protein, putative	N/A
3	3.74851	37.2854	LmjF.22.0860	0.139015	2.60502e-216	5.21004e-213	0.652	0.207	Protein of unknown function (DUF3184), putative	N/A
3	3.74851	37.2854	LmjF.21.0430	0.138918	2.1585e-28	4.31701e-25	0.765	0.493	hypothetical protein, conserved	N/A
3	3.74851	37.2854	LmjF.15.0370	0.138852	1.26311e-05	0.0252622	0.509	0.217	60S acidic ribosomal protein, putative	structural constituent of ribosome
3	3.74851	37.2854	LmjF.28.2940	0.138741	6.72362e-11	1.34472e-07	0.462	0.145	hypothetical protein, unknown function	N/A
3	3.74851	37.2854	LmjF.21.1050	0.138647	2.52046e-63	5.04092e-60	0.965	0.652	60S ribosomal protein L9, putative	rRNA binding;structural constituent of ribosome
3	3.74851	37.2854	LmjF.20.1650	0.138315	5.14504e-44	1.02901e-40	0.917	0.643	ribosomal protein S11 homolog	structural constituent of ribosome
3	3.74851	37.2854	LmjF.29.0890	0.13809	3.58382e-31	7.16764e-28	0.385	0.168	Eukaryotic protein of unknown function (DUF914), putative	transmembrane transporter activity
3	3.74851	37.2854	LmjF.21.1605	0.136809	5.37036e-26	1.07407e-22	0.372	0.141	hypothetical protein, conserved	N/A
3	3.74851	37.2854	LmjF.15.1510	0.136346	1.43825e-93	2.87651e-90	0.316	0.144	hypothetical protein, conserved	N/A
3	3.74851	37.2854	LmjF.06.0415	0.136184	3.97754e-10	7.95509e-07	0.73	0.48	60S ribosomal protein L19, putative	RNA binding;structural constituent of ribosome
3	3.74851	37.2854	LmjF.35.5100	0.136112	6.61792e-31	1.32358e-27	0.727	0.432	60S ribosomal protein L37	structural constituent of ribosome
3	3.74851	37.2854	LmjF.20.1560	0.136042	9.91277e-72	1.98255e-68	0.32	0.142	amidohydrolase, putative	hydrolase activity
3	3.74851	37.2854	LmjF.32.1880	0.136005	5.8019e-147	1.16038e-143	0.737	0.337	3'-5' exonuclease, putative	3'-5' exonuclease activity;nucleic acid binding
3	3.74851	37.2854	LmjF.25.2100	0.134721	0	0	0.113	0.061	TPR repeat, putative	protein binding
[truncated: 4,459 more rows]
