# Supplementary material for: Stress conditions promote Leishmania hybridization in vitro marked by expression of the ancestral gamete fusogen HAP2 as revealed by single-cell RNA-seq
Source: eLife. 2022 Jan 7;11:e73488. doi: 10.7554/eLife.73488 (PMC8794473; doi:10.7554/eLife.73488)
Supplement: Supplementary file 3. [file elife-73488-supp3.xls]

## Sheet: L747_cluster_markers
Supplementary Table 3. Differentially expressed genes for each of the seven cell clusters identified in L747 and MA37 (integrated irradiated and untreated samples) according to FindAllMarkers function in Seurat R package, with the following cutoff values: percentage of cells expressing a given gene > 10%, log2FC > 0.1 and Wilcoxon Rank Sum test adjusted p-value < 0.05). Pct.1: percentage of cells…
L747_Cluster_ID	Gene_ID	Avg_log2FC	P_value	P_val_adj	Pct.1	Pct.2	Product_Description	Computed_GO_Functions
0	LmjF.33.3240	0.873637	6.31888e-178	5.16695e-174	0.419	0.257	h1 histone-like protein	N/A
0	LmjF.15.1490	0.85826	1.72247e-139	1.40846e-135	0.271	0.14	hypothetical protein, conserved	N/A
0	LmjF.26.2210	0.852942	1.643e-132	1.34348e-128	0.158	0.057	AAA ATPase domain containing protein, putative	N/A
0	LmjF.36.3220	0.831504	1.23969e-121	1.01369e-117	0.251	0.132	hypothetical protein, conserved	N/A
0	LmjF.23.0950	0.827608	5.02956e-123	4.11267e-119	0.236	0.118	cytosolic leucyl aminopeptidase	manganese ion binding;metalloaminopeptidase activity
0	LmjF.13.0690	0.790187	1.4632e-134	1.19646e-130	0.327	0.192	PSP1 C-terminal conserved region, putative	N/A
0	LmjF.33.0650	0.716789	8.41145e-98	6.87804e-94	0.257	0.148	hypothetical protein, conserved	N/A
0	LmjF.15.1450	0.71405	1.2314e-88	1.00692e-84	0.274	0.17	proliferative cell nuclear antigen (PCNA), putative	DNA binding;DNA polymerase processivity factor activity
0	LmjF.36.4190	0.690452	1.71839e-79	1.40513e-75	0.16	0.079	GINS complex protein, putative	N/A
0	LmjF.36.5820	0.687907	5.49797e-86	4.49569e-82	0.188	0.097	mkiaa0324 protein-like protein	N/A
0	LmjF.32.2940	0.683214	3.209e-74	2.624e-70	0.142	0.068	hypothetical protein, conserved	N/A
0	LmjF.35.3510	0.678432	9.48837e-78	7.75864e-74	0.258	0.161	structural maintenance of chromosome (SMC) family protein, putative	ATP binding;protein binding
0	LmjF.25.1780	0.676794	6.72666e-66	5.50039e-62	0.196	0.116	ATP-grasp domain containing protein, putative	ATP binding;D-alanine-D-alanine ligase activity;metal ion binding;protein binding
0	LmjF.35.0380	0.65086	1.11673e-68	9.13149e-65	0.217	0.132	thioredoxin, putative	N/A
0	LmjF.28.2385	0.648073	1.4591e-63	1.19311e-59	0.233	0.15	DNA replication licensing factor MCM6, putative	ATP binding;DNA binding;DNA helicase activity
0	LmjF.22.0660	0.63976	3.6779e-70	3.00742e-66	0.224	0.137	glucoamylase-like protein	N/A
0	LmjF.29.0850	0.629789	1.2937e-78	1.05785e-74	0.37	0.276	High mobility group protein TDP1	N/A
0	LmjF.35.4280	0.624146	1.86015e-60	1.52104e-56	0.231	0.149	Spindle assembly abnormal protein 6 homolog	N/A
0	LmjF.32.3790	0.620638	1.73203e-61	1.41628e-57	0.247	0.165	cyclin-dependent kinase regulatory subunit	cyclin-dependent protein serine/threonine kinase regulator activity
0	LmjF.31.2760	0.618725	4.16939e-57	3.40931e-53	0.237	0.158	kinetoplast-associated protein-like protein	N/A
0	LmjF.25.1010	0.607738	1.92344e-55	1.57279e-51	0.172	0.101	2OG-Fe(II) oxygenase superfamily, putative	oxidoreductase activity
0	LmjF.28.0890	0.60102	7.43555e-75	6.08005e-71	0.342	0.244	ribonucleoside-diphosphate reductase large chain, putative	ATP binding;ribonucleoside-diphosphate reductase activity, thioredoxin disulfide as acceptor
0	LmjF.30.1260	0.590752	2.39549e-59	1.95879e-55	0.262	0.179	hypothetical protein, conserved	N/A
0	LmjF.36.1590	0.589551	4.13309e-61	3.37963e-57	0.238	0.154	STAG domain containing protein, putative	N/A
0	LmjF.30.1370	0.587296	9.68086e-64	7.91604e-60	0.218	0.135	PSP1 C-terminal conserved region, putative	N/A
0	LmjF.08.0890	0.581268	3.8761e-49	3.16948e-45	0.203	0.133	mitochondrial DNA polymerase beta	DNA binding;DNA polymerase activity;DNA-directed DNA polymerase activity
0	LmjF.28.0850	0.581027	3.45963e-54	2.82894e-50	0.263	0.186	DNA replication licensing factor MCM2, putative	ATP binding;DNA binding
0	LmjF.36.0270	0.567684	5.74306e-44	4.6961e-40	0.135	0.078	hypothetical protein, conserved	N/A
0	LmjF.31.0990	0.567461	2.54766e-46	2.08322e-42	0.215	0.146	hypothetical protein, unknown function	N/A
0	LmjF.27.0350	0.563103	9.61327e-56	7.86077e-52	0.286	0.206	RNA recognition motif (a.k.a. RRM, RBD, or RNP domain), putative	nucleic acid binding
0	LmjF.06.1200	0.541694	4.50421e-41	3.68309e-37	0.137	0.081	hypothetical protein, unknown function	N/A
0	LmjF.36.5920	0.539973	1.11488e-42	9.11638e-39	0.21	0.144	kinetoplast DNA-associated protein, putative	N/A
0	LmjF.31.0070	0.538629	3.97842e-40	3.25315e-36	0.167	0.108	helicase-like protein	ATP binding;DNA binding;hydrolase activity
0	LmjF.16.1540	0.53787	8.6128e-41	7.04269e-37	0.247	0.183	DNA polymerase I alpha catalytic subunit, putative	DNA binding;DNA-directed DNA polymerase activity;nucleic acid binding;nucleotide binding
0	LmjF.32.2155	0.536226	2.34768e-34	1.9197e-30	0.201	0.145	hypothetical protein, conserved	N/A
0	LmjF.35.1100	0.526593	3.18975e-39	2.60825e-35	0.159	0.101	hypothetical protein, conserved	N/A
0	LmjF.21.1210	0.5234	2.1697e-38	1.77417e-34	0.164	0.107	thymidine kinase, putative	ATP binding;thymidine kinase activity
0	LmjF.28.1420	0.51986	9.37115e-40	7.66279e-36	0.21	0.147	DNA polymerase kappa, putative	DNA-directed DNA polymerase activity;damaged DNA binding
0	LmjF.28.2300	0.518757	4.38721e-38	3.58742e-34	0.187	0.128	hypothetical protein, conserved	N/A
0	LmjF.14.0670	0.516833	4.41329e-60	3.60875e-56	0.396	0.318	fatty acid elongase, putative	N/A
0	LmjF.12.0640	0.514819	1.05447e-35	8.6224e-32	0.192	0.134	primase 2, putative	hydrolase activity, acting on acid anhydrides
0	LmjF.36.6710	0.508305	1.60897e-32	1.31566e-28	0.136	0.087	replication factor C subunit 3, putative	DNA binding
0	LmjF.25.0920	0.504632	6.48129e-33	5.29975e-29	0.136	0.087	Histone RNA hairpin-binding protein RNA-binding domain containing protein, putative	RNA binding;mRNA binding
0	LmjF.07.0790	0.50225	6.10942e-34	4.99567e-30	0.146	0.094	hypothetical protein, conserved	N/A
0	LmjF.32.3780	0.494928	1.39594e-37	1.14146e-33	0.111	0.063	kinetoplast-associated protein 3, putative	N/A
0	LmjF.19.1170	0.494175	2.33903e-32	1.91262e-28	0.167	0.115	hypothetical protein, unknown function	N/A
0	LmjF.32.3430	0.490674	1.02214e-27	8.35808e-24	0.161	0.114	Uncharacterised protein family UPF0564, putative	N/A
0	LmjF.08.0900	0.483806	1.25991e-32	1.03023e-28	0.179	0.125	mitochondrial DNA polymerase beta-PAK, putative	DNA binding;DNA polymerase activity;DNA-directed DNA polymerase activity
0	LmjF.35.3440	0.483254	7.74584e-31	6.33377e-27	0.182	0.129	replication factor A protein 3, putative	DNA binding
0	LmjF.36.4040	0.481843	1.72544e-35	1.41089e-31	0.308	0.252	hypothetical protein, conserved	protein binding
0	LmjF.36.0330	0.480013	4.5326e-30	3.70631e-26	0.125	0.08	ribonuclease HII, putative	RNA binding;RNA-DNA hybrid ribonuclease activity;nucleic acid binding
0	LmjF.30.1900	0.477534	2.44744e-33	2.00127e-29	0.125	0.076	hypothetical protein, conserved	N/A
0	LmjF.05.1090	0.476205	1.59943e-30	1.30786e-26	0.227	0.174	double-strand-break repair protein rad21 homolog, putative	protein binding
0	LmjF.18.1180	0.473453	1.04119e-25	8.51382e-22	0.167	0.122	hypothetical protein, conserved	N/A
0	LmjF.36.6600	0.469018	6.82157e-29	5.578e-25	0.191	0.14	hypothetical protein, conserved	N/A
0	LmjF.30.2340	0.467269	1.03716e-29	8.48082e-26	0.208	0.155	zinc-finger protein, conserved	N/A
0	LmjF.34.1480	0.46467	3.65607e-28	2.98957e-24	0.154	0.107	hypothetical protein, conserved	N/A
0	LmjF.35.4560	0.4644	1.53717e-32	1.25695e-28	0.109	0.063	PHD-like zinc-binding domain containing protein, putative	N/A
0	LmjF.23.0680	0.464326	7.69967e-26	6.29602e-22	0.232	0.185	mitochondrial DNA primase, putative	hydrolase activity, acting on acid anhydrides
0	LmjF.25.1590	0.462699	6.08732e-27	4.9776e-23	0.157	0.111	hypothetical protein, conserved	N/A
0	LmjF.26.2390	0.459069	1.82335e-29	1.49095e-25	0.188	0.137	Primase zinc finger/Mcm10 replication factor, putative	double-stranded DNA binding;single-stranded DNA binding
0	LmjF.33.1230	0.454593	1.39054e-28	1.13705e-24	0.119	0.075	WD domain, G-beta repeat, putative	protein binding
0	LmjF.15.0270	0.450667	8.50859e-23	6.95748e-19	0.2	0.156	replication Factor A 28 kDa subunit, putative	DNA binding;nucleic acid binding
0	LmjF.30.1860	0.447267	1.03311e-25	8.44771e-22	0.117	0.076	hypothetical protein, unknown function	N/A
0	LmjF.35.4360	0.442841	6.38251e-32	5.21897e-28	0.218	0.161	DNA polymerase epsilon catalytic subunit, putative	DNA binding;DNA-directed DNA polymerase activity;nucleic acid binding;nucleotide binding;zinc ion binding
0	LmjF.23.0960	0.440856	4.10512e-23	3.35675e-19	0.137	0.096	hypothetical protein, conserved	N/A
0	LmjF.15.1290	0.435478	1.45549e-25	1.19016e-21	0.168	0.121	mitochondrial DNA topoisomerase II	ATP binding;DNA binding;DNA topoisomerase type II (double strand cut, ATP-hydrolyzing) activity
0	LmjF.32.2310	0.435237	3.39113e-25	2.77293e-21	0.222	0.174	hypothetical protein, conserved	N/A
0	LmjF.28.2760	0.428766	1.0958e-17	8.96032e-14	0.19	0.154	gamma-tubulin complex component 3	gamma-tubulin binding
0	LmjF.27.0600	0.426858	7.16271e-20	5.85694e-16	0.148	0.11	hypothetical protein, conserved	N/A
0	LmjF.11.0860	0.42614	4.26297e-23	3.48583e-19	0.199	0.154	hypothetical protein, conserved	N/A
0	LmjF.27.0020	0.425957	1.29157e-25	1.05612e-21	0.174	0.127	Meckelin (Transmembrane protein 67), putative	N/A
0	LmjF.27.2270	0.422919	3.38135e-21	2.76493e-17	0.191	0.15	hypothetical protein, conserved	N/A
0	LmjF.17.0650	0.421651	8.75529e-20	7.1592e-16	0.157	0.119	hypothetical protein, conserved	N/A
0	LmjF.35.4440	0.418716	3.07216e-23	2.51211e-19	0.14	0.098	hypothetical protein, conserved	N/A
0	LmjF.30.3650	0.417511	2.99534e-153	2.44929e-149	0.877	0.814	ribosomal protein L15, putative	structural constituent of ribosome
0	LmjF.36.1180	0.416605	4.01842e-22	3.28586e-18	0.137	0.096	hypothetical protein, conserved	N/A
0	LmjF.13.0530	0.416065	2.23128e-20	1.82452e-16	0.167	0.127	hypothetical protein, conserved	N/A
0	LmjF.36.6640	0.409969	1.47503e-19	1.20613e-15	0.198	0.158	hypothetical protein, conserved	N/A
0	LmjF.35.2570	0.408619	1.95676e-17	1.60004e-13	0.175	0.139	hypothetical protein, conserved	N/A
0	LmjF.32.0840	0.408446	8.88671e-46	7.26666e-42	0.454	0.393	hypothetical protein, conserved	nucleic acid binding
0	LmjF.19.1050	0.408359	1.07074e-21	8.75541e-18	0.183	0.14	hypothetical protein, unknown function	N/A
0	LmjF.26.0640	0.403901	2.90527e-45	2.37564e-41	0.509	0.46	10 kDa heat shock protein, putative	N/A
0	LmjF.13.1600	0.401402	7.73056e-24	6.32128e-20	0.216	0.169	hypothetical protein, conserved	N/A
0	LmjF.04.1090	0.398428	1.34314e-16	1.09829e-12	0.153	0.119	hypothetical protein, conserved	N/A
0	LmjF.06.0860	0.397571	3.30651e-17	2.70374e-13	0.236	0.201	dihydrofolate reductase-thymidylate synthase	dihydrofolate reductase activity;thymidylate synthase activity
0	LmjF.26.0870	0.394141	8.00658e-16	6.54698e-12	0.179	0.144	ISWI complex protein	N/A
0	LmjF.26.0460	0.392449	2.02386e-45	1.65491e-41	0.549	0.509	ATPase subunit 9, putative	proton transmembrane transporter activity
0	LmjF.21.0430	0.391227	3.6405e-27	2.97684e-23	0.34	0.29	hypothetical protein, conserved	N/A
0	LmjF.28.1210	0.390445	1.11715e-17	9.13493e-14	0.227	0.191	hypothetical protein, conserved	N/A
0	LmjF.04.0630	0.38874	1.51018e-23	1.23487e-19	0.345	0.308	hypothetical protein, conserved	N/A
0	LmjF.28.0210	0.387915	1.69034e-16	1.38219e-12	0.216	0.181	Histone H2B variant V	DNA binding;protein heterodimerization activity
0	LmjF.34.0940	0.387392	8.18066e-17	6.68933e-13	0.171	0.136	Wee1-like protein kinase, putative	ATP binding;protein kinase activity
0	LmjF.26.1710	0.384567	7.10469e-27	5.80951e-23	0.387	0.35	cytochrome c oxidase subunit V, putative	N/A
0	LmjF.17.0280	0.383496	1.11519e-16	9.11889e-13	0.169	0.134	histone H2A variant Z	DNA binding;protein heterodimerization activity
0	LmjF.30.2360	0.378576	9.84809e-21	8.05278e-17	0.101	0.066	zinc-finger protein, conserved	metal ion binding;zinc ion binding
0	LmjF.33.2320	0.377848	3.86881e-19	3.16353e-15	0.127	0.09	cell division cycle 45 (CDC45), putative	N/A
0	LmjF.36.5350	0.377268	3.0486e-14	2.49284e-10	0.122	0.092	kinetoplastid kinetochore protein 2, putative	ATP binding;protein kinase activity
0	LmjF.20.1070	0.375652	3.35987e-13	2.74737e-09	0.136	0.107	hypothetical protein, unknown function	N/A
0	LmjF.35.1355	0.373803	2.50165e-15	2.0456e-11	0.101	0.072	hypothetical protein	N/A
0	LmjF.29.0805	0.371599	7.8607e-19	6.42769e-15	0.107	0.073	hypothetical protein, conserved	N/A
0	LmjF.35.4050	0.371293	7.04367e-15	5.75961e-11	0.157	0.124	kinetoplastid kinetochore protein 3, putative	ATP binding;protein kinase activity
0	LmjF.17.0430	0.370922	2.07576e-14	1.69735e-10	0.161	0.129	hypothetical protein, conserved	N/A
0	LmjF.35.4550	0.370173	1.3952e-15	1.14086e-11	0.218	0.185	hypothetical protein, conserved	protein binding
0	LmjF.24.0290	0.36957	1.6258e-13	1.32942e-09	0.157	0.127	NLI interacting factor-like phosphatase, putative	N/A
0	LmjF.22.0680	0.367324	6.37014e-17	5.20887e-13	0.1	0.069	hypothetical protein, conserved	N/A
0	LmjF.36.3870	0.36689	2.86158e-12	2.33991e-08	0.174	0.145	hypothetical protein, conserved	N/A
0	LmjF.21.1568	0.365114	2.46213e-16	2.01329e-12	0.115	0.083	hypothetical protein, conserved	N/A
0	LmjF.18.0210	0.364345	4.05517e-25	3.31592e-21	0.423	0.397	Activator of Hsp90 ATPase, N-terminal/Activator of Hsp90 ATPase homolog 1-like protein, putative	ATPase activator activity;Hsp90 protein binding;chaperone binding
0	LmjF.26.1640	0.364141	4.81097e-124	3.93393e-120	0.864	0.817	40S ribosomal protein S33, putative	structural constituent of ribosome
0	LmjF.14.0920	0.360445	1.95497e-15	1.59858e-11	0.259	0.228	mitochondrial DNA polymerase I protein C	DNA binding;DNA-directed DNA polymerase activity
0	LmjF.36.0480	0.360377	1.24358e-59	1.01687e-55	0.67	0.632	hypothetical protein, conserved	N/A
0	LmjF.21.0340	0.356609	1.35704e-31	1.10965e-27	0.47	0.432	mitochondrial processing peptidase alpha subunit, putative	metal ion binding
0	LmjF.21.0740	0.356161	1.28095e-17	1.04743e-13	0.372	0.347	ATPase subunit 9, putative	proton transmembrane transporter activity
0	LmjF.22.1000	0.356137	4.97247e-15	4.06599e-11	0.128	0.097	hypothetical protein, conserved	N/A
0	LmjF.09.0010	0.354972	1.0735e-28	8.77799e-25	0.45	0.415	hypothetical protein, conserved	N/A
0	LmjF.21.1820	0.354479	4.78604e-49	3.91354e-45	0.585	0.536	60S ribosomal protein L37a, putative	structural constituent of ribosome
0	LmjF.25.1180	0.354267	6.81635e-34	5.57373e-30	0.459	0.413	ATP synthase subunit beta, mitochondrial, putative	ATP binding;proton-transporting ATP synthase activity, rotational mechanism
0	LmjF.34.0010	0.353618	4.60405e-44	3.76473e-40	0.584	0.548	short chain dehydrogenase, putative	N/A
0	LmjF.16.1320	0.352413	1.45809e-44	1.19228e-40	0.585	0.551	cytochrome c, putative	electron transfer activity;heme binding
0	LmjF.31.0730	0.350688	1.30051e-15	1.06343e-11	0.27	0.238	hypothetical protein, unknown function	N/A
0	LmjF.35.4760	0.350218	3.60801e-15	2.95027e-11	0.125	0.093	hypothetical protein, conserved	N/A
0	LmjF.35.0100	0.34848	8.26239e-29	6.75616e-25	0.44	0.404	ubiquinol-cytochrome c reductase complex 14kD subunit, putative	N/A
0	LmjF.28.0825	0.348153	1.87774e-17	1.53543e-13	0.322	0.292	RNA binding protein rbp16, putative	nucleic acid binding
0	LmjF.25.1980	0.347603	1.86509e-12	1.52509e-08	0.179	0.15	hypothetical protein, conserved	N/A
0	LmjF.28.2640	0.346837	2.03263e-11	1.66208e-07	0.135	0.107	molybdenum cofactor biosynthesis protein, putative	N/A
0	LmjF.30.3600	0.346663	7.5846e-14	6.20193e-10	0.26	0.232	ATP synthase, epsilon chain, putative	proton-transporting ATP synthase activity, rotational mechanism
0	LmjF.22.0390	0.341632	3.05902e-13	2.50136e-09	0.141	0.111	DNA primase small subunit, putative	DNA primase activity
0	LmjF.34.3450	0.339555	1.44295e-11	1.1799e-07	0.188	0.16	hypothetical protein, conserved	N/A
0	LmjF.27.0750	0.338329	6.98717e-10	5.71341e-06	0.202	0.18	Stress responsive A/B Barrel Domain, putative	N/A
0	LmjF.34.1320	0.33775	4.56614e-16	3.73374e-12	0.288	0.256	hypothetical protein, conserved	N/A
0	LmjF.33.3250	0.336926	8.20768e-10	6.71142e-06	0.144	0.12	hypothetical protein, conserved	N/A
0	LmjF.29.1870	0.336263	1.21952e-09	9.97203e-06	0.154	0.13	hypothetical protein, conserved	N/A
0	LmjF.34.2250	0.33619	1.85196e-13	1.51435e-09	0.108	0.08	Galactose oxidase, central domain containing protein, putative	protein binding
0	LmjF.29.0020	0.33502	2.04144e-08	0.000166928	0.164	0.143	transcription factor-like protein	N/A
0	LmjF.05.1050	0.333201	8.37087e-12	6.84486e-08	0.103	0.078	hypothetical protein, unknown function	N/A
0	LmjF.19.0210	0.333053	8.57719e-53	7.01357e-49	0.654	0.61	ADP,ATP carrier protein 1, mitochondrial precursor, putative	ATP:ADP antiporter activity
0	LmjF.13.0180	0.330169	2.78685e-10	2.2788e-06	0.107	0.083	Tetratricopeptide repeat, putative	protein binding
0	LmjF.15.0280	0.329377	1.62468e-15	1.3285e-11	0.377	0.36	ribonucleoprotein p18, mitochondrial precursor, putative	protein binding
0	LmjF.24.0310	0.328716	6.97996e-10	5.70751e-06	0.151	0.126	hypothetical protein, conserved	N/A
0	LmjF.22.0460	0.328076	1.77466e-89	1.45114e-85	0.819	0.778	40S ribosomal protein S15, putative	RNA binding;structural constituent of ribosome
0	LmjF.24.1500	0.327445	2.28793e-26	1.87084e-22	0.473	0.448	translationally controlled tumor protein (TCTP), putative	N/A
0	LmjF.36.3790	0.326392	1.55089e-09	1.26817e-05	0.106	0.084	hypothetical protein, conserved	protein binding
0	LmjF.27.0130	0.325205	4.0001e-168	3.27088e-164	0.975	0.944	WW domain/Zinc finger C-x8-C-x5-C-x3-H type (and similar), putative	metal ion binding;protein binding
0	LmjF.32.1700	0.321971	6.12627e-11	5.00945e-07	0.127	0.101	hypothetical protein, conserved	N/A
0	LmjF.27.1890	0.320671	1.34308e-12	1.09824e-08	0.106	0.079	endo/exonuclease Mre11, putative	endonuclease activity;hydrolase activity;manganese ion binding
0	LmjF.26.1190	0.319661	7.59001e-09	6.20636e-05	0.197	0.176	hypothetical protein, conserved	N/A
0	LmjF.13.0400	0.317947	1.40472e-10	1.14864e-06	0.177	0.151	Sister chromatid cohesion C-terminus, putative	chromatin binding
0	LmjF.33.2490	0.314535	1.63754e-10	1.33901e-06	0.259	0.238	recombinase rad51, putative	ATP binding;DNA binding;DNA-dependent ATPase activity
0	LmjF.35.0660	0.314421	5.41161e-09	4.42507e-05	0.126	0.104	RING finger protein, conserved	N/A
0	LmjF.34.2580	0.313529	2.21155e-129	1.80838e-125	0.945	0.915	ALBA-domain protein 3	nucleic acid binding
0	LmjF.13.1480	0.312264	9.96961e-21	8.15215e-17	0.445	0.427	Ran-binding protein 1, putative	N/A
0	LmjF.15.0380	0.310984	2.61022e-44	2.13437e-40	0.661	0.633	60S acidic ribosomal protein, putative	structural constituent of ribosome
0	LmjF.36.2020	0.308936	1.89881e-14	1.55265e-10	0.34	0.317	chaperonin HSP60, mitochondrial precursor	ATP binding
0	LmjF.36.1950	0.308512	2.68803e-07	0.002198	0.18	0.162	DNA mismatch repair protein MSH6, putative	ATP binding;mismatched DNA binding
0	LmjF.36.5810	0.308244	6.60268e-10	5.39901e-06	0.175	0.15	hypothetical protein, conserved	N/A
0	LmjF.21.1555	0.308238	8.87214e-31	7.25475e-27	0.537	0.507	hypothetical protein, conserved	N/A
0	LmjF.26.0560	0.307997	4.03177e-08	0.000329678	0.173	0.152	hypothetical protein, conserved	N/A
0	LmjF.24.1960	0.307424	1.27713e-08	0.000104431	0.188	0.166	hypothetical protein, conserved	N/A
0	LmjF.25.0280	0.307277	1.65898e-11	1.35655e-07	0.106	0.081	hypothetical protein, conserved	N/A
0	LmjF.33.0410	0.306934	2.5655e-08	0.000209781	0.155	0.133	DNA mismatch repair protein MSH2, putative	ATP binding;DNA binding;mismatched DNA binding
0	LmjF.26.0890	0.306871	1.77232e-107	1.44923e-103	0.927	0.888	40S ribosomal protein S16, putative	structural constituent of ribosome
0	LmjF.14.0665	0.306661	9.53781e-24	7.79906e-20	0.469	0.445	fatty acid elongase, putative	N/A
0	LmjF.33.1080	0.305178	1.46265e-08	0.000119601	0.216	0.196	YEATS family, putative	N/A
0	LmjF.32.3610	0.302031	2.52225e-13	2.06244e-09	0.357	0.339	hypothetical protein, conserved	N/A
0	LmjF.21.1330	0.30196	6.88558e-08	0.000563034	0.205	0.187	RecF/RecN/SMC N terminal domain/SMC proteins Flexible Hinge Domain, putative	ATP binding;protein binding
0	LmjF.31.1000	0.300705	2.17011e-10	1.77449e-06	0.245	0.221	hypothetical protein, conserved	N/A
0	LmjF.22.0120	0.299722	2.99273e-09	2.44715e-05	0.104	0.082	hypothetical protein, conserved	N/A
0	LmjF.04.0950	0.29826	6.27911e-114	5.13442e-110	0.941	0.907	60S ribosomal protein L10, putative	structural constituent of ribosome
0	LmjF.32.0240	0.29797	8.14441e-08	0.000665968	0.142	0.121	hypothetical protein, conserved	N/A
0	LmjF.34.0920	0.29474	2.60223e-06	0.0212784	0.115	0.098	hypothetical protein, conserved	N/A
0	LmjF.36.1330	0.294582	1.02954e-09	8.41855e-06	0.174	0.149	heat shock protein, putative	N/A
0	LmjF.35.0950	0.294242	1.20993e-08	9.89357e-05	0.165	0.143	cell cycle sequence binding phosphoprotein (RBP33), putative	N/A
0	LmjF.26.1785	0.293844	8.23348e-08	0.000673251	0.137	0.117	histone acetyltransferase subunit NuA4, putative	N/A
0	LmjF.31.0080	0.290995	2.19028e-25	1.79099e-21	0.548	0.533	hypothetical protein, conserved	metal ion binding
0	LmjF.35.2050	0.289781	9.18789e-77	7.51294e-73	0.866	0.842	60S ribosomal protein L32	structural constituent of ribosome
0	LmjF.34.2340	0.288342	5.43478e-21	4.44402e-17	0.441	0.417	asparaginyl-tRNA synthetase, putative	ATP binding;aminoacyl-tRNA ligase activity;asparagine-tRNA ligase activity;nucleic acid binding;nucleotide binding
0	LmjF.34.2370	0.288199	2.54644e-07	0.00208222	0.187	0.169	hypothetical protein, conserved	protein heterodimerization activity
0	LmjF.28.2460	0.286657	9.93e-103	8.11976e-99	0.935	0.904	ribosomal protein S29, putative	structural constituent of ribosome;zinc ion binding
0	LmjF.26.1100	0.286112	1.09383e-14	8.94429e-11	0.377	0.357	hypothetical protein, conserved	N/A
0	LmjF.36.4410	0.286034	2.27257e-08	0.000185828	0.186	0.164	hypothetical protein, conserved	N/A
0	LmjF.05.0500	0.285944	1.3455e-24	1.10021e-20	0.539	0.524	ATP synthase F1, alpha subunit, putative	ATP binding;proton-transporting ATP synthase activity, rotational mechanism
0	LmjF.36.0190	0.285474	4.18897e-136	3.42532e-132	0.975	0.955	elongation factor 2	GTP binding;GTPase activity
0	LmjF.29.1510	0.285084	1.93513e-07	0.00158236	0.273	0.261	Nodulin-like, putative	N/A
0	LmjF.18.0740	0.284859	2.17348e-06	0.0177726	0.221	0.208	Elongation factor Tu, mitochondrial, putative	GTP binding;GTPase activity
0	LmjF.08.1260	0.28344	1.25918e-14	1.02963e-10	0.443	0.436	hypothetical protein, conserved	N/A
0	LmjF.15.0825	0.282124	2.65673e-08	0.00021724	0.102	0.082	hypothetical protein, conserved	N/A
0	LmjF.36.2115	0.282007	1.37315e-07	0.00112282	0.119	0.099	hypothetical protein, conserved	N/A
0	LmjF.29.2650	0.28168	6.81402e-07	0.00557182	0.119	0.101	Nuclear condensing complex subunits, C-term domain containing protein, putative	N/A
0	LmjF.34.4570	0.281543	3.82305e-07	0.00312611	0.234	0.218	hypothetical protein, conserved	N/A
0	LmjF.33.1090	0.280905	9.29858e-08	0.000760344	0.251	0.236	guanylate kinase, putative	guanylate kinase activity
0	LmjF.27.1260	0.279967	1.15319e-06	0.00942964	0.273	0.265	T-complex protein 1, beta subunit, putative	ATP binding;unfolded protein binding
0	LmjF.29.2260	0.279784	4.61095e-07	0.00377038	0.105	0.087	DNA replication complex GINS protein SLD5, putative	N/A
0	LmjF.16.1520	0.277884	3.10533e-07	0.00253922	0.135	0.115	hypothetical protein, conserved	N/A
0	LmjF.03.0200	0.273306	4.81481e-11	3.93707e-07	0.347	0.331	delta-1-pyrroline-5-carboxylate dehydrogenase, putative	1-pyrroline-5-carboxylate dehydrogenase activity;oxidoreductase activity;oxidoreductase activity, acting on the aldehyde or oxo group of donors, NAD or NADP as acceptor
0	LmjF.25.0130	0.27152	1.10235e-06	0.00901389	0.165	0.147	elongation factor, putative	GTP binding;GTPase activity
0	LmjF.03.0230	0.271084	4.53766e-10	3.71044e-06	0.31	0.294	long chain fatty Acyl CoA synthetase, putative	N/A
0	LmjF.10.0870	0.269932	2.30671e-07	0.0018862	0.287	0.276	histone H3	DNA binding;protein heterodimerization activity
0	LmjF.35.4970	0.269536	1.19245e-06	0.00975063	0.131	0.112	hypothetical protein, conserved	N/A
0	LmjF.26.0620	0.268365	3.11453e-14	2.54675e-10	0.405	0.39	10 kDa heat shock protein, putative	N/A
0	LmjF.36.1770	0.267789	9.29401e-11	7.59971e-07	0.378	0.368	hypothetical protein, conserved	N/A
0	LmjF.11.1170	0.267611	1.18772e-22	9.71199e-19	0.513	0.495	eukaryotic release factor 3, putative	GTP binding;GTPase activity
0	LmjF.33.1240	0.266582	1.6789e-06	0.0137283	0.109	0.091	hypothetical protein, conserved	protein binding
0	LmjF.34.0840	0.264861	1.32275e-08	0.000108162	0.366	0.363	translation elongation factor 1-beta, putative	translation elongation factor activity
0	LmjF.26.2305	0.264692	1.26613e-06	0.0103532	0.121	0.102	hypothetical protein, conserved	N/A
0	LmjF.34.0910	0.264563	2.73766e-07	0.00223859	0.258	0.243	hypothetical protein, conserved	N/A
0	LmjF.36.0260	0.262401	2.57139e-11	2.10263e-07	0.349	0.334	xylulokinase, putative	phosphotransferase activity, alcohol group as acceptor;xylulokinase activity
0	LmjF.26.2240	0.262229	1.20649e-06	0.00986549	0.174	0.155	kynureninase, putative	catalytic activity;kynureninase activity;pyridoxal phosphate binding
0	LmjF.35.0740	0.261744	1.42382e-07	0.00116426	0.121	0.1	hypothetical protein, conserved	protein binding
0	LmjF.28.2560	0.2612	7.99182e-38	6.53491e-34	0.719	0.698	40S ribosomal protein S17, putative	structural constituent of ribosome
0	LmjF.34.0630	0.255243	2.06762e-06	0.0169069	0.101	0.084	hypothetical protein, conserved	N/A
0	LmjF.30.3090	0.255113	5.54761e-06	0.0453628	0.294	0.291	RNA-binding protein 42 (RNA-binding motif protein 42), putative	N/A
0	LmjF.36.5850	0.253895	8.23198e-66	6.73129e-62	0.859	0.832	flagellum targeting protein kharon1, putative	N/A
0	LmjF.33.1955	0.252175	1.06691e-35	8.72408e-32	0.721	0.699	60S ribosomal protein L37	structural constituent of ribosome
0	LmjF.26.0880	0.248188	6.25833e-48	5.11744e-44	0.802	0.784	40S ribosomal protein S16, putative	structural constituent of ribosome
0	LmjF.31.0010	0.246674	1.4007e-07	0.00114535	0.388	0.391	5-methyltetrahydropteroyltriglutamate-homocysteine S-methyltransferase	5-methyltetrahydropteroyltriglutamate-homocysteine S-methyltransferase activity;zinc ion binding
0	LmjF.36.5010	0.244646	9.17829e-44	7.50509e-40	0.792	0.774	40S ribosomal protein SA, putative	structural constituent of ribosome
0	LmjF.35.1300	0.242415	5.20062e-54	4.25255e-50	0.834	0.809	ubiquitin-conjugating enzyme E2, putative	N/A
0	LmjF.28.2750	0.242304	1.53982e-64	1.25911e-60	0.893	0.869	receptor for activated C kinase 1	protein binding
0	LmjF.04.1160	0.2377	4.51442e-11	3.69144e-07	0.482	0.485	fructose-1,6-bisphosphatase	fructose 1,6-bisphosphate 1-phosphatase activity;phosphatase activity;phosphoric ester hydrolase activity
0	LmjF.36.6480	0.234218	2.15408e-11	1.76139e-07	0.391	0.38	histidine secretory acid phosphatase, putative	N/A
0	LmjF.25.1120	0.23119	5.51485e-06	0.0450949	0.34	0.34	aldehyde dehydrogenase, mitochondrial precursor	oxidoreductase activity;oxidoreductase activity, acting on the aldehyde or oxo group of donors, NAD or NADP as acceptor
0	LmjF.11.0820	0.228355	1.0151e-09	8.30045e-06	0.45	0.455	hypothetical protein, conserved	N/A
0	LmjF.28.1490	0.228014	4.68142e-22	3.828e-18	0.644	0.639	Protein of unknown function (DUF423), putative	N/A
0	LmjF.36.6980	0.225877	1.68869e-08	0.000138084	0.436	0.442	eukaryotic translation initiation factor 3 subunit c	RNA binding;translation initiation factor activity;translation initiation factor binding
0	LmjF.28.2555	0.221309	7.15692e-27	5.85221e-23	0.68	0.663	40S ribosomal protein S17, putative	structural constituent of ribosome
0	LmjF.36.1430	0.218885	1.25641e-36	1.02737e-32	0.804	0.785	translation elongation factor 1-beta, putative	translation elongation factor activity
0	LmjF.29.2460	0.217918	4.28144e-32	3.50094e-28	0.753	0.742	60S ribosomal protein L13, putative	structural constituent of ribosome
0	LmjF.05.0510	0.216106	2.81074e-24	2.29834e-20	0.657	0.648	ATP synthase F1, alpha subunit, putative	ATP binding;proton-transporting ATP synthase activity, rotational mechanism
0	LmjF.27.1810	0.212555	1.36061e-35	1.11257e-31	0.77	0.751	Phosphoenolpyruvate carboxykinase [ATP], glycosomal	ATP binding;phosphoenolpyruvate carboxykinase (ATP) activity;phosphoenolpyruvate carboxykinase activity;purine nucleotide binding
0	LmjF.29.2470	0.211294	2.6319e-21	2.15211e-17	0.668	0.67	60S ribosomal protein L13, putative	structural constituent of ribosome
0	LmjF.27.1390	0.210841	2.94877e-31	2.41121e-27	0.792	0.783	60S acidic ribosomal protein P0, putative	N/A
0	LmjF.33.3150	0.210597	1.67778e-09	1.37192e-05	0.456	0.455	40S ribosomal protein S13, putative	structural constituent of ribosome
0	LmjF.28.2080	0.210513	6.26096e-21	5.11959e-17	0.661	0.664	DEAD-box ATP-dependent RNA helicase, mitochondrial	ATP binding;nucleic acid binding
0	LmjF.25.1190	0.209945	1.41772e-11	1.15927e-07	0.493	0.494	ribosomal protein S25	N/A
0	LmjF.35.1540	0.208692	1.83692e-07	0.00150205	0.412	0.414	rieske iron-sulfur protein, mitochondrial precursor, putative	2 iron, 2 sulfur cluster binding;ubiquinol-cytochrome-c reductase activity
0	LmjF.14.0190	0.206836	2.25177e-11	1.84127e-07	0.507	0.512	Thioredoxin-like, putative	N/A
0	LmjF.36.3210	0.20518	2.93753e-15	2.40202e-11	0.543	0.538	14-3-3 protein 1, putative	N/A
0	LmjF.11.0630	0.205161	1.86374e-08	0.000152398	0.43	0.431	metallo-peptidase, Clan MF, Family M17	manganese ion binding;metalloaminopeptidase activity
0	LmjF.33.1140	0.203791	1.4474e-12	1.18354e-08	0.547	0.547	hypothetical protein, conserved	N/A
0	LmjF.35.3230	0.203444	6.6045e-15	5.4005e-11	0.615	0.623	cystathione gamma lyase, putative	catalytic activity;pyridoxal phosphate binding
0	LmjF.33.1070	0.201995	2.26075e-09	1.84861e-05	0.465	0.47	hypothetical protein, unknown function	N/A
0	LmjF.32.0450	0.200329	2.84736e-27	2.32828e-23	0.79	0.779	40S ribosomal protein S2	RNA binding;structural constituent of ribosome
0	LmjF.36.0040	0.200307	2.62103e-11	2.14322e-07	0.52	0.526	N-acetylglucosamine-6-phosphate deacetylase-like protein	hydrolase activity;hydrolase activity, acting on carbon-nitrogen (but not peptide) bonds
0	LmjF.23.1220	0.199743	2.6845e-10	2.19511e-06	0.534	0.548	T-complex protein 1, gamma subunit, putative	ATP binding;unfolded protein binding
0	LmjF.25.1170	0.195574	6.52057e-09	5.33187e-05	0.485	0.493	ATP synthase subunit beta, mitochondrial, putative	ATP binding;proton-transporting ATP synthase activity, rotational mechanism
0	LmjF.35.2010	0.19187	5.11374e-27	4.18151e-23	0.761	0.746	40S ribosomal protein S6, putative	structural constituent of ribosome
0	LmjF.35.4470	0.185108	3.17249e-13	2.59415e-09	0.6	0.6	Co-chaperone protein P23	N/A
0	LmjF.35.1380	0.178187	1.81643e-10	1.4853e-06	0.538	0.547	mitochondrial processing peptidase, beta subunit, putative	metal ion binding
0	LmjF.22.0030	0.175935	7.46229e-16	6.10192e-12	0.676	0.675	60S ribosomal protein L11 (L5, L16)	structural constituent of ribosome
0	LmjF.18.1510	0.16821	1.15908e-15	9.47784e-12	0.658	0.661	P-type H+-ATPase, putative	nucleotide binding;proton-exporting ATPase activity, phosphorylative mechanism
0	LmjF.14.0650	0.165674	1.33647e-18	1.09283e-14	0.749	0.751	fatty acid elongase, putative	N/A
0	LmjF.24.2210	0.163941	1.32832e-10	1.08617e-06	0.549	0.548	60S ribosomal protein L12, putative	structural constituent of ribosome
0	LmjF.15.0950	0.162947	6.63423e-18	5.42481e-14	0.714	0.711	40S ribosomal protein S3, putative	RNA binding;structural constituent of ribosome
0	LmjF.11.0970	0.159126	3.41945e-12	2.79608e-08	0.613	0.613	40S ribosomal protein S5	structural constituent of ribosome
0	LmjF.09.0930	0.158822	1.67749e-06	0.0137168	0.506	0.521	calmodulin, putative	calcium ion binding
0	LmjF.35.3780	0.158436	6.65803e-09	5.44427e-05	0.563	0.573	60S ribosomal protein L27A/L29, putative	structural constituent of ribosome
0	LmjF.19.1160	0.152948	1.5032e-07	0.00122917	0.499	0.503	hypothetical protein, conserved	N/A
0	LmjF.35.2200	0.152135	1.06843e-07	0.000873652	0.491	0.497	RNA-binding protein, putative	nucleic acid binding
0	LmjF.28.1200	0.150773	4.17285e-06	0.0341214	0.51	0.527	luminal binding protein 1 (BiP), putative	N/A
0	LmjF.36.5120	0.148897	1.3617e-16	1.11346e-12	0.766	0.767	40S ribosomal protein SA, putative	structural constituent of ribosome
0	LmjF.36.1620	0.147053	2.01275e-28	1.64582e-24	0.918	0.907	universal minicircle sequence binding protein	nucleic acid binding;zinc ion binding
0	LmjF.25.0490	0.14631	5.26282e-24	4.30341e-20	0.764	0.758	RNA-binding protein UBP1, putative	RNA binding;nucleic acid binding
0	LmjF.35.3100	0.142491	3.2788e-18	2.68108e-14	0.835	0.83	ATP-dependent RNA helicase, putative	ATP binding;helicase activity;nucleic acid binding
0	LmjF.36.1265	0.136772	1.02817e-14	8.40733e-11	0.813	0.815	hypothetical protein	N/A
0	LmjF.25.0500	0.132628	4.61626e-10	3.77471e-06	0.52	0.517	RNA-binding protein UBP2, putative	RNA binding;nucleic acid binding
0	LmjF.24.2080	0.125813	2.20859e-06	0.0180596	0.621	0.639	40S ribosomal protein S8, putative	structural constituent of ribosome
0	LmjF.10.0990	0.123828	4.90993e-07	0.00401485	0.608	0.618	histone H3	DNA binding;protein heterodimerization activity
0	LmjF.24.2050	0.122444	1.79884e-07	0.00147091	0.588	0.601	60S ribosomal protein L26, putative	RNA binding;structural constituent of ribosome
0	LmjF.25.0910	0.116468	7.85903e-10	6.42633e-06	0.731	0.742	cyclophilin a, putative	peptidyl-prolyl cis-trans isomerase activity
0	LmjF.27.1380	0.105205	3.09152e-06	0.0252794	0.694	0.714	60S acidic ribosomal protein P0, putative	N/A
0	LmjF.35.1910	0.103707	1.89036e-06	0.0154575	0.619	0.635	ribosomal protein L15, putative	structural constituent of ribosome
1	LmjF.29.1770	1.21466	0	0	0.682	0.42	paraflagellar rod protein 1D, putative	calmodulin binding
1	LmjF.10.0185	0.896598	6.7626e-157	5.52978e-153	0.477	0.318	hypothetical protein	N/A
1	LmjF.18.1640	0.855518	6.95829e-129	5.6898e-125	0.44	0.294	hypothetical protein, conserved	N/A
1	LmjF.36.4230	0.824356	3.13244e-107	2.5614e-103	0.333	0.201	paraflagellar rod component, putative	protein binding
1	LmjF.16.1425	0.811285	7.62571e-148	6.23554e-144	0.54	0.394	Paraflagellar rod protein 2-3	calmodulin binding
1	LmjF.24.1560	0.80125	1.35517e-187	1.10812e-183	0.628	0.473	hypothetical protein, conserved	N/A
1	LmjF.19.0520	0.752384	8.99771e-93	7.35743e-89	0.368	0.245	hypothetical protein, conserved	N/A
1	LmjF.02.0550	0.575968	1.16465e-76	9.52338e-73	0.538	0.44	hypothetical protein, unknown function	N/A
1	LmjF.09.0210	0.561029	1.85359e-59	1.51568e-55	0.428	0.335	Domain of unknown function (DUF4586), putative	N/A
1	LmjF.21.1250	0.559731	1.25937e-58	1.02978e-54	0.504	0.431	adenylate kinase, putative	ATP binding;adenylate kinase activity;nucleobase-containing compound kinase activity;phosphotransferase activity, phosphate group as acceptor
1	LmjF.29.1750	0.520743	1.79748e-42	1.4698e-38	0.413	0.345	paraflagellar rod protein 1D, putative	calmodulin binding
1	LmjF.32.1680	0.51865	3.78635e-29	3.0961e-25	0.26	0.2	Paraflagellar Rod Proteome Component 9, putative	N/A
1	LmjF.24.1980	0.518337	4.72297e-53	3.86197e-49	0.443	0.362	STOP axonemal protein, putative	N/A
1	LmjF.33.0610	0.494933	5.82305e-24	4.7615e-20	0.207	0.153	paraflagellar rod component, putative	N/A
1	LmjF.29.1170	0.475536	3.29164e-33	2.69157e-29	0.413	0.359	hypothetical protein, conserved	calcium ion binding
1	LmjF.30.2850	0.45699	5.84172e-17	4.77678e-13	0.249	0.206	hypothetical protein, conserved	N/A
1	LmjF.34.2500	0.410573	2.78333e-15	2.27593e-11	0.244	0.204	protein phosphatase 2C-like protein	cation binding;phosphatase activity;protein serine/threonine phosphatase activity
1	LmjF.07.0310	0.404011	2.54017e-16	2.0771e-12	0.252	0.21	paraflagellar rod protein, putative	calmodulin binding
1	LmjF.29.1030	0.388677	8.57226e-15	7.00954e-11	0.221	0.181	hypothetical protein, conserved	N/A
1	LmjF.32.1910	0.38694	1.73301e-13	1.41708e-09	0.178	0.141	hypothetical protein, conserved	N/A
1	LmjF.36.5340	0.372271	1.7229e-13	1.40881e-09	0.179	0.141	hypothetical protein, conserved	N/A
1	LmjF.02.0310	0.371193	1.17562e-11	9.61305e-08	0.198	0.164	Soluble NSF attachment protein, SNAP, putative	protein binding
1	LmjF.30.3680	0.355207	4.26064e-14	3.48393e-10	0.413	0.39	hypothetical protein, conserved	N/A
1	LmjF.05.1080	0.352339	1.0083e-13	8.2449e-10	0.255	0.217	Phosphatidylinositol 4-phosphate 5-kinase, putative	N/A
1	LmjF.32.0360	0.347251	2.90638e-10	2.37654e-06	0.2	0.169	hypothetical protein, conserved	N/A
1	LmjF.32.0350	0.346429	4.4332e-10	3.62503e-06	0.247	0.217	hypothetical protein, conserved	N/A
1	LmjF.35.5340	0.338683	5.46235e-09	4.46657e-05	0.16	0.132	Dynein heavy chain and region D6 of dynein motor/Ankyrin repeats (3 copies), putative	protein binding
1	LmjF.09.0910	0.334567	4.92547e-09	4.02756e-05	0.304	0.282	calmodulin, putative	calcium ion binding
1	LmjF.09.0920	0.332615	6.50882e-10	5.32226e-06	0.313	0.289	calmodulin, putative	calcium ion binding
1	LmjF.11.0810	0.331857	2.29368e-10	1.87555e-06	0.202	0.169	hypothetical protein, conserved	calcium ion binding
1	LmjF.36.4780	0.321911	1.0814e-07	0.000884263	0.197	0.172	paraflagellar rod component, putative	N/A
1	LmjF.17.0260	0.320331	1.4795e-11	1.20979e-07	0.288	0.256	hypothetical protein, conserved	N/A
1	LmjF.19.1160	0.318961	1.78877e-22	1.46268e-18	0.522	0.495	hypothetical protein, conserved	N/A
1	LmjF.34.1520	0.31559	1.63147e-12	1.33405e-08	0.439	0.425	p25-alpha, putative	N/A
1	LmjF.26.2250	0.315062	5.15667e-09	4.21661e-05	0.202	0.172	hypothetical protein, conserved	N/A
1	LmjF.27.1480	0.312638	2.35959e-09	1.92944e-05	0.254	0.225	cyclic nucleotide-binding domain containing protein, putative	N/A
1	LmjF.33.1170	0.306428	7.06324e-08	0.000577561	0.171	0.145	hypothetical protein, conserved	N/A
1	LmjF.29.0660	0.301025	1.09932e-10	8.98918e-07	0.365	0.341	flagellar radial spoke protein-like, putative	N/A
1	LmjF.25.1600	0.297385	7.14766e-08	0.000584464	0.202	0.175	hypothetical protein, conserved	protein binding
1	LmjF.28.2890	0.289815	1.59619e-09	1.30521e-05	0.331	0.305	hypothetical protein, conserved	N/A
1	LmjF.21.0180	0.288511	6.7937e-09	5.55521e-05	0.315	0.292	CHAT domain containing protein, putative	protein binding
1	LmjF.29.1000	0.285321	6.86271e-08	0.000561163	0.266	0.243	hypothetical protein, conserved	N/A
1	LmjF.13.1160	0.283537	1.86422e-07	0.00152437	0.327	0.312	calmodulin, putative	calcium ion binding
1	LmjF.35.4060	0.283524	1.76202e-09	1.4408e-05	0.375	0.355	Regulatory subunit of type II PKA R-subunit, putative	calcium ion binding
1	LmjF.32.1060	0.275235	2.04651e-06	0.0167343	0.268	0.249	Dynein intermediate chain, axonemal	protein binding
1	LmjF.06.0190	0.273769	5.36877e-06	0.0439004	0.145	0.124	hypothetical protein, conserved	N/A
1	LmjF.04.0050	0.268277	1.66259e-07	0.0013595	0.382	0.375	hypothetical protein, conserved	N/A
1	LmjF.14.1440	0.266294	3.57385e-09	2.92234e-05	0.393	0.377	cytoskeleton associated protein, putative	N/A
1	LmjF.30.1240	0.265981	3.09601e-06	0.0253161	0.126	0.105	calcium-binding protein, putative	calcium ion binding
1	LmjF.14.1220	0.228865	3.62304e-09	2.96256e-05	0.489	0.488	hypothetical protein, conserved	N/A
1	LmjF.20.1310	0.228109	6.66936e-22	5.45354e-18	0.727	0.729	small myristoylated protein-1	N/A
1	LmjF.23.0720	0.220757	6.57644e-10	5.37755e-06	0.465	0.453	RNA recognition motif. (a.k.a. RRM, RBD, or RNP domain), putative	nucleic acid binding
1	LmjF.36.1635	0.201853	8.96628e-22	7.33173e-18	0.736	0.736	poly-zinc finger protein 2, putative	nucleic acid binding;zinc ion binding
1	LmjF.36.5850	0.186682	1.25448e-23	1.02579e-19	0.835	0.844	flagellum targeting protein kharon1, putative	N/A
1	LmjF.34.1410	0.183837	1.70849e-16	1.39703e-12	0.825	0.833	d-isomer specific 2-hydroxyacid dehydrogenase- like protein	NAD binding
1	LmjF.22.0730	0.174899	9.71687e-11	7.94548e-07	0.619	0.637	cytoskeleton associated protein, putative	N/A
1	LmjF.36.3620	0.127507	1.29078e-08	0.000105547	0.754	0.781	EF-hand domain pair, putative	calcium ion binding
1	LmjF.30.3650	0.118941	3.12787e-13	2.55766e-09	0.834	0.837	ribosomal protein L15, putative	structural constituent of ribosome
1	LmjF.22.0460	0.107381	6.10071e-07	0.00498855	0.773	0.798	40S ribosomal protein S15, putative	RNA binding;structural constituent of ribosome
2	LmjF.31.1440	1.96489	0	0	0.77	0.328	hypothetical protein, unknown function (pseudogene)	N/A
2	LmjF.10.0540	1.96268	0	0	0.679	0.257	hypothetical protein, unknown function	N/A
2	LmjF.27.1590	1.73474	0	0	0.534	0.105	diacylglycerol acyltransferase, putative	transferase activity, transferring acyl groups other than amino-acyl groups
2	LmjF.26.2680	1.70739	0	0	0.615	0.18	hypothetical protein, unknown function	N/A
2	LmjF.05.1215	1.69406	0	0	0.551	0.12	surface antigen-like protein	N/A
2	LmjF.28.2650	1.68497	0	0	0.522	0.124	membrane-bound acid phosphatase, putative	N/A
2	LmjF.35.0500	1.57206	0	0	0.706	0.276	proteophosphoglycan ppg3, putative	protein binding;transmembrane signaling receptor activity
2	LmjF.17.0630	1.56486	0	0	0.375	0.054	hypothetical protein, unknown function	N/A
2	LmjF.17.0100	1.56348	0	0	0.761	0.376	hypothetical protein, conserved	N/A
2	LmjF.26.2570	1.52396	0	0	0.919	0.551	Serine/threonine-protein kinase NEK15, putative	ATP binding;protein kinase activity
2	LmjF.10.0370	1.50515	0	0	0.643	0.198	folate/biopterin transporter, putative	N/A
2	LmjF.06.1260	1.49437	0	0	0.926	0.608	pteridine transporter, putative	N/A
2	LmjF.36.0660	1.46124	0	0	0.553	0.147	Enriched in surface-labeled proteome protein 18	N/A
2	LmjF.27.0680	1.41927	0	0	0.889	0.577	amino acid permease, putative	N/A
2	LmjF.12.1090	1.40282	0	0	0.741	0.394	surface antigen protein, putative	N/A
2	LmjF.04.0040	1.38147	0	0	0.536	0.169	hypothetical protein	N/A
2	LmjF.09.0060	1.37312	0	0	0.943	0.72	RNA-binding protein 5, putative	nucleic acid binding
2	LmjF.12.0980	1.35261	0	0	0.495	0.166	promastigote surface antigen protein 2 PSA2	N/A
2	LmjF.30.2950	1.23793	0	0	0.507	0.167	phospholipase c-like protein	calcium ion binding;phosphatidylinositol phospholipase C activity;phosphoric diester hydrolase activity
2	LmjF.09.0600	1.20403	0	0	0.676	0.322	cyclin 1	serine-type peptidase activity
2	LmjF.24.1250	1.18758	0	0	0.628	0.247	amastin-like surface protein-like protein	N/A
2	LmjF.35.0650	1.18128	0	0	0.632	0.264	hypothetical protein, unknown function	N/A
2	LmjF.31.0870	1.17889	0	0	0.685	0.311	amino acid permease 3	N/A
2	LmjF.04.0660	1.16867	0	0	0.393	0.116	hypothetical protein, conserved	N/A
2	LmjF.28.0980	1.15994	0	0	0.331	0.062	P27 protein, putative	N/A
2	LmjF.04.0390	1.13693	0	0	0.509	0.17	hypothetical protein	N/A
2	LmjF.10.0030	1.13161	0	0	0.627	0.297	phosphate-Repressible Phosphate Permease-like protein	inorganic phosphate transmembrane transporter activity
2	LmjF.36.2590	1.06218	0	0	0.916	0.75	membrane-bound acid phosphatase 2, putative	N/A
2	LmjF.30.3550	1.06002	0	0	0.419	0.136	cytochrome p450-like protein	heme binding;iron ion binding;monooxygenase activity;oxidoreductase activity, acting on paired donors, with incorporation or reduction of molecular oxygen
2	LmjF.31.0680	1.05687	0	0	0.687	0.331	C2 domain containing protein, putative	N/A
2	LmjF.30.0290	1.05308	9.70922e-297	7.93923e-293	0.427	0.147	hypothetical protein, unknown function	N/A
2	LmjF.23.1050	1.04847	2.79732e-229	2.28737e-225	0.436	0.179	small hydrophilic endoplasmic reticulum-associated protein (sherp)	N/A
2	LmjF.36.4140	1.03655	0	0	0.266	0.044	Amastin surface glycoprotein, putative	N/A
2	LmjF.24.2230	1.03492	0	0	0.794	0.467	Heme Response-1 protein, putative	N/A
2	LmjF.12.1020	1.00251	6.40224e-301	5.23511e-297	0.662	0.328	surface antigen protein, putative	N/A
2	LmjF.07.1160	0.972575	0	0	0.98	0.929	amino acid transporter 19, putative	N/A
2	LmjF.26.1590	0.971934	1.15894e-295	9.47664e-292	0.584	0.254	hypothetical protein, unknown function	protein binding
2	LmjF.32.2660	0.957379	0	0	0.987	0.912	L-Lysine transport protein, putative	N/A
2	LmjF.23.0360	0.951357	2.48595e-221	2.03276e-217	0.294	0.091	NADP-dependent alcohol dehydrogenase, putative	oxidoreductase activity;zinc ion binding
2	LmjF.18.1660	0.940503	3.66008e-239	2.99285e-235	0.523	0.238	gamma-glutamylcysteine synthetase, putative	catalytic activity;glutamate-cysteine ligase activity
2	LmjF.04.1020	0.940243	1.48328e-273	1.21288e-269	0.733	0.436	hypothetical protein, conserved	N/A
2	LmjF.35.2810	0.93825	3.25959e-197	2.66537e-193	0.611	0.34	transporter, putative	transmembrane transporter activity
2	LmjF.11.0550	0.936285	5.1528e-289	4.21344e-285	0.306	0.08	nucleobase transporter	nucleoside transmembrane transporter activity
2	LmjF.35.0460	0.917862	5.88088e-232	4.8088e-228	0.385	0.142	Generative cell specific 1 protein, putative	N/A
2	LmjF.08.0680	0.916333	3.30946e-119	2.70614e-115	0.795	0.624	amastin-like protein	N/A
2	LmjF.16.0920	0.908637	5.53069e-289	4.52245e-285	0.27	0.063	flagellar calcium-binding protein, putative	N/A
2	LmjF.06.0010	0.900732	1.05033e-260	8.58859e-257	0.836	0.574	histone H4	DNA binding;protein heterodimerization activity
2	LmjF.34.0580	0.898904	3.95996e-207	3.23806e-203	0.593	0.316	hypothetical protein, conserved	N/A
2	LmjF.15.0010	0.891983	8.95014e-207	7.31853e-203	0.723	0.462	histone H4	DNA binding;protein heterodimerization activity
2	LmjF.16.0470	0.88987	2.25358e-224	1.84275e-220	0.377	0.137	hypothetical protein, conserved	N/A
2	LmjF.35.1510	0.886483	1.67898e-246	1.3729e-242	0.564	0.261	NLI interacting factor-like phosphatase/Zinc finger C-x8-C-x5-C-x3-H type (and similar), putative	metal ion binding
2	LmjF.08.0840	0.882396	7.08371e-230	5.79235e-226	0.443	0.178	amastin-like protein	N/A
2	LmjF.17.0235	0.878799	7.97775e-216	6.52341e-212	0.606	0.325	receptor-type adenylate cyclase b	N/A
2	LmjF.17.1010	0.878566	5.15965e-230	4.21904e-226	0.24	0.061	hydrolase, alpha/beta fold family-like protein	N/A
2	LmjF.33.0820	0.875742	6.37995e-271	5.21689e-267	0.879	0.7	beta tubulin	GTP binding;GTPase activity;structural constituent of cytoskeleton
2	LmjF.14.1490	0.872209	2.11969e-226	1.73327e-222	0.452	0.185	synaptojanin (N-terminal domain), putative	phosphoric ester hydrolase activity
2	LmjF.24.2110	0.871425	6.6822e-257	5.46403e-253	0.799	0.549	3-hydroxy-3-methylglutaryl-CoA synthase, putative	transferase activity, transferring acyl groups
2	LmjF.29.1740	0.862408	0	0	0.944	0.798	histone H2A, putative	DNA binding;protein heterodimerization activity
2	LmjF.34.3645	0.856792	4.34922e-258	3.55636e-254	0.209	0.042	hypothetical protein (pseudogene)	N/A
2	LmjF.16.0500	0.84749	3.52081e-188	2.87896e-184	0.359	0.14	hypothetical protein, unknown function	N/A
2	LmjF.31.2300	0.846247	1.87498e-207	1.53317e-203	0.384	0.149	3'-nucleotidase/nuclease, putative	endonuclease activity;hydrolase activity, acting on ester bonds;nucleic acid binding
2	LmjF.31.2060	0.833587	1.13107e-269	9.24877e-266	0.203	0.037	CRAL/TRIO domain containing protein, putative	N/A
2	LmjF.35.1630	0.829532	8.92832e-230	7.30069e-226	0.421	0.162	hypothetical protein, conserved	N/A
2	LmjF.27.0670	0.824234	5.31579e-241	4.34672e-237	0.321	0.099	amino acid permease, putative	N/A
2	LmjF.29.1520	0.814409	5.25141e-192	4.29408e-188	0.341	0.128	major facilitator superfamily, putative	transmembrane transporter activity
2	LmjF.11.1000	0.810223	2.96822e-227	2.42711e-223	0.524	0.233	pyruvate phosphate dikinase, putative	ATP binding;catalytic activity;kinase activity;pyruvate, phosphate dikinase activity;transferase activity, transferring phosphorus-containing groups
2	LmjF.13.1320	0.80552	3.34118e-223	2.73209e-219	0.311	0.098	hypothetical protein, conserved	N/A
2	LmjF.07.0990	0.805325	3.16743e-213	2.59001e-209	0.817	0.632	nucleolar RNA-binding protein, putative	N/A
2	LmjF.26.1340	0.80134	6.56959e-161	5.37195e-157	0.626	0.391	DNA ligase k alpha, putative	ATP binding;DNA ligase (ATP) activity
2	LmjF.31.1760	0.795813	1.58983e-176	1.3e-172	0.435	0.197	hypothetical protein, unknown function	N/A
2	LmjF.12.0130	0.793024	2.39236e-219	1.95623e-215	0.336	0.114	Cell division protein kinase, putative	ATP binding;protein kinase activity
2	LmjF.29.1410	0.791101	4.28608e-205	3.50473e-201	0.307	0.102	hypothetical protein, unknown function	N/A
2	LmjF.16.1470	0.788207	1.19698e-159	9.78767e-156	0.451	0.222	kinesin, putative	ATP binding;microtubule binding;microtubule motor activity
2	LmjF.31.0940	0.786111	3.36111e-202	2.74838e-198	0.568	0.285	hypothetical protein	N/A
2	LmjF.23.1440	0.785167	1.98891e-186	1.62633e-182	0.579	0.306	hypothetical protein, unknown function	N/A
2	LmjF.22.0250	0.785054	7.70422e-227	6.29974e-223	0.26	0.071	phosphoinositide phosphatase	phosphatase activity;phosphoprotein phosphatase activity;protein tyrosine phosphatase activity
2	LmjF.04.0100	0.784388	1.92944e-203	1.57771e-199	0.33	0.116	hypothetical protein, conserved	N/A
2	LmjF.09.1340	0.782283	1.11393e-255	9.10858e-252	0.907	0.748	histone H2B	DNA binding;protein heterodimerization activity
2	LmjF.28.0570	0.777542	2.31767e-216	1.89516e-212	0.316	0.103	major surface protease gp63, putative	metalloendopeptidase activity
2	LmjF.24.2250	0.777307	2.41318e-188	1.97326e-184	0.63	0.354	fatty-acid desaturase, putative	oxidoreductase activity, acting on paired donors, with oxidation of a pair of donors resulting in the reduction of molecular oxygen to two molecules of water;stearoyl-CoA 9-desaturase activity
2	LmjF.22.0740	0.770555	8.14299e-207	6.65852e-203	0.467	0.201	hypothetical protein, conserved	metal ion binding
2	LmjF.30.0750	0.762442	1.73683e-188	1.42021e-184	0.344	0.13	4-methyl-5(beta-hydroxyethyl)-thiazole monophosphate synthesis protein, putative	N/A
2	LmjF.31.1160	0.75706	1.50129e-186	1.22761e-182	0.247	0.075	hypothetical protein, unknown function	N/A
2	LmjF.10.0480	0.754454	1.4587e-143	1.19278e-139	0.51	0.275	GP63, leishmanolysin	metalloendopeptidase activity
2	LmjF.35.2820	0.75194	3.54278e-167	2.89693e-163	0.428	0.194	major facilitator superfamily, putative	transmembrane transporter activity
2	LmjF.08.0660	0.751705	2.63031e-208	2.1508e-204	0.233	0.062	protein kinase, putative	ATP binding;protein kinase activity
2	LmjF.10.0150	0.751634	2.98989e-203	2.44483e-199	0.357	0.131	conserved protein, unknown function	N/A
2	LmjF.10.0400	0.746593	1.14179e-173	9.3364e-170	0.685	0.422	folate/biopterin transporter, putative	N/A
2	LmjF.15.0630	0.744027	1.27782e-186	1.04487e-182	0.412	0.173	hypothetical protein, unknown function	N/A
2	LmjF.18.0430	0.741969	1.02937e-216	8.41717e-213	0.22	0.054	hypothetical protein, unknown function	N/A
2	LmjF.10.0260	0.741732	3.68865e-187	3.01621e-183	0.612	0.328	COPI associated protein, putative	N/A
2	LmjF.31.2140	0.734404	5.61254e-230	4.58938e-226	0.175	0.033	hypothetical protein, unknown function	N/A
2	LmjF.17.0190	0.726552	1.5484e-185	1.26613e-181	0.264	0.084	receptor-type adenylate cyclase, putative	N/A
2	LmjF.11.0560	0.725356	7.09919e-158	5.80501e-154	0.28	0.103	transcription modulator/accessory protein, putative	N/A
2	LmjF.26.2550	0.724315	3.73823e-167	3.05675e-163	0.315	0.12	hypothetical protein, conserved	N/A
2	LmjF.33.0520	0.723873	7.73454e-172	6.32453e-168	0.295	0.105	d-xylulose reductase, putative	oxidoreductase activity;zinc ion binding
2	LmjF.26.1440	0.723381	9.86548e-189	8.067e-185	0.385	0.154	hypothetical protein, conserved	N/A
2	LmjF.23.1110	0.720614	8.12886e-185	6.64697e-181	0.337	0.126	hypothetical protein, unknown function	transferase activity, transferring phosphorus-containing groups
2	LmjF.23.1060	0.708854	1.98111e-170	1.61996e-166	0.661	0.392	hydrophilic acylated surface protein b	N/A
2	LmjF.34.0070	0.706633	4.4992e-133	3.679e-129	0.448	0.231	ascorbate peroxidase	heme binding;peroxidase activity
2	LmjF.07.0770	0.700314	1.5257e-167	1.24757e-163	0.465	0.221	DNAJ-domain transmembrane-like protein	N/A
2	LmjF.18.1100	0.700057	6.65753e-184	5.44387e-180	0.269	0.087	Ankyrin repeats (3 copies), putative	protein binding
2	LmjF.16.0760	0.6966	1.98353e-163	1.62193e-159	0.597	0.329	transaldolase, putative	catalytic activity;sedoheptulose-7-phosphate:D-glyceraldehyde-3-phosphate glyceronetransferase activity
2	LmjF.15.1160	0.696123	1.80102e-163	1.4727e-159	0.541	0.282	tryparedoxin peroxidase	antioxidant activity;oxidoreductase activity;peroxiredoxin activity
2	LmjF.34.3330	0.692848	4.90779e-186	4.0131e-182	0.18	0.042	cytochrome p450-like protein	heme binding;iron ion binding;oxidoreductase activity, acting on paired donors, with incorporation or reduction of molecular oxygen
2	LmjF.22.1610	0.69277	4.69268e-174	3.8372e-170	0.5	0.241	hypothetical protein, conserved	N/A
2	LmjF.11.0990	0.689324	3.34314e-171	2.73369e-167	0.352	0.141	adaptin-related protein-like protein	N/A
2	LmjF.35.5040	0.685633	5.34957e-146	4.37434e-142	0.533	0.292	polyadenylate-binding protein 1	RNA binding;nucleic acid binding
2	LmjF.23.1267	0.682884	3.25622e-178	2.66261e-174	0.205	0.055	hypothetical protein, unknown function	N/A
2	LmjF.34.3250	0.681139	3.74521e-170	3.06246e-166	0.237	0.074	Alpha-keto-acid decarboxylase, putative	carboxy-lyase activity;catalytic activity;magnesium ion binding;thiamine pyrophosphate binding
2	LmjF.20.1180	0.675568	2.18888e-152	1.78985e-148	0.691	0.449	calpain-like cysteine peptidase, putative	calcium-dependent cysteine-type endopeptidase activity
2	LmjF.33.2300	0.67103	2.05118e-161	1.67725e-157	0.422	0.191	udp-glc 4'-epimerase, putative	UDP-glucose 4-epimerase activity;catalytic activity
2	LmjF.18.0640	0.670468	6.97347e-177	5.70221e-173	0.344	0.132	CAMK/CAMKL family protein kinase, putative	ATP binding;protein kinase activity
2	LmjF.24.1410	0.669979	5.56444e-146	4.55004e-142	0.277	0.106	hypothetical predicted transmembrane protein	N/A
2	LmjF.30.3500	0.661048	1.34098e-167	1.09652e-163	0.343	0.135	S-adenosylmethionine synthetase	ATP binding;methionine adenosyltransferase activity
2	LmjF.11.0720	0.655798	3.33703e-106	2.72869e-102	0.47	0.272	PUF nine target 1	N/A
2	LmjF.06.0210	0.655369	8.55131e-86	6.9924e-82	0.591	0.421	FHA domain containing protein, putative	protein binding
2	LmjF.14.0040	0.655037	9.41506e-162	7.69869e-158	0.285	0.104	J Biosynthesis Protein 2	ATP binding
2	LmjF.10.0483	0.653199	1.28582e-145	1.05142e-141	0.257	0.094	hypothetical protein, unknown function	N/A
2	LmjF.32.0630	0.652968	9.77551e-162	7.99343e-158	0.283	0.102	AmmeMemoRadiSam system protein A/uncharacterized protein, PH0010 family, putative	N/A
2	LmjF.33.0680	0.646877	9.34584e-154	7.64209e-150	0.292	0.11	sterol C-24 reductase, putative	oxidoreductase activity, acting on the CH-CH group of donors, NAD or NADP as acceptor
2	LmjF.22.0180	0.644901	9.0862e-155	7.42979e-151	0.261	0.092	hypothetical protein, conserved	N/A
2	LmjF.35.4350	0.642524	9.56883e-151	7.82444e-147	0.343	0.142	PGAP1-like protein, putative	hydrolase activity, acting on ester bonds
2	LmjF.22.0860	0.642281	4.21338e-152	3.44528e-148	0.215	0.068	Protein of unknown function (DUF3184), putative	N/A
2	LmjF.33.2340	0.641907	5.33902e-140	4.36571e-136	0.559	0.314	succinyl-coA:3-ketoacid-coenzyme A transferase, mitochondrial precursor, putative	CoA-transferase activity
2	LmjF.22.1150	0.641232	5.19766e-157	4.25012e-153	0.219	0.068	Protein kinase domain containing protein, putative	ATP binding;protein kinase activity
2	LmjF.14.0320	0.638678	1.43463e-145	1.1731e-141	0.319	0.13	Polyamine transporter 1	transmembrane transporter activity
2	LmjF.17.0520	0.638518	3.37611e-149	2.76064e-145	0.248	0.087	hypothetical protein, unknown function	N/A
2	LmjF.31.0455	0.638484	0	0	0.982	0.907	tuzin	N/A
2	LmjF.36.1940	0.637451	0	0	1	0.998	inosine-guanosine transporter	nucleoside transmembrane transporter activity
2	LmjF.19.1420	0.633544	1.82729e-138	1.49418e-134	0.643	0.392	cysteine peptidase A (CPA)	cysteine-type peptidase activity
2	LmjF.18.0580	0.63269	1.1388e-142	9.31194e-139	0.267	0.1	peroxisomal enoyl-coa hydratase, putative	catalytic activity
2	LmjF.03.0380	0.631506	3.0434e-144	2.48859e-140	0.26	0.095	GPR1/FUN34/yaaH family, putative	N/A
2	LmjF.20.1700	0.630002	3.7254e-132	3.04626e-128	0.368	0.169	hypothetical protein, conserved	N/A
2	LmjF.30.1610	0.626704	2.29111e-146	1.87344e-142	0.25	0.089	ferric reductase transmembrane protein, putative	oxidoreductase activity
2	LmjF.03.0920	0.625618	9.66094e-224	7.89975e-220	0.127	0.016	Got1/Sft2-like family, putative	N/A
2	LmjF.31.3110	0.6249	2.50004e-162	2.04428e-158	0.167	0.041	Flagellum attachment zone protein 14	N/A
2	LmjF.31.0350	0.62415	0	0	0.982	0.956	amino acid transporter aATP11, putative	N/A
2	LmjF.31.2310	0.623936	1.6562e-98	1.35428e-94	0.536	0.337	3'-nucleotidase/nuclease precursor, putative	endonuclease activity;hydrolase activity, acting on ester bonds;nucleic acid binding
2	LmjF.34.0510	0.622705	2.96617e-157	2.42544e-153	0.164	0.041	phosphoglycan beta 1,2 arabinosyltransferase, (SCA like)	N/A
2	LmjF.21.0845	0.620488	6.90953e-111	5.64992e-107	0.464	0.257	hypoxanthine-guanine phosphoribosyltransferase	hypoxanthine phosphoribosyltransferase activity
2	LmjF.30.3170	0.619769	2.69043e-153	2.19996e-149	0.764	0.536	Tumour suppressor, Mitostatin, putative	N/A
2	LmjF.30.3520	0.619291	1.56972e-152	1.28356e-148	0.406	0.182	S-adenosylmethionine synthetase	ATP binding;methionine adenosyltransferase activity
2	LmjF.33.1400	0.616175	1.72512e-139	1.41063e-135	0.354	0.156	STE/STE11 serine/threonine-protein kinase, putative	ATP binding;protein binding;protein kinase activity
2	LmjF.31.1220	0.612494	6.51158e-148	5.32452e-144	0.518	0.268	Pyrophosphate-energized vacuolar membrane proton pump 1, putative	inorganic diphosphatase activity;pyrophosphate hydrolysis-driven proton transmembrane transporter activity
2	LmjF.23.1290	0.610802	2.13104e-139	1.74255e-135	0.427	0.204	hypothetical protein, unknown function	N/A
2	LmjF.26.1980	0.610525	2.51984e-135	2.06047e-131	0.416	0.2	hypothetical protein, conserved	N/A
2	LmjF.04.0240	0.609849	1.3223e-114	1.08125e-110	0.479	0.262	GRAM domain containing protein, putative	N/A
2	LmjF.31.1980	0.608052	1.4205e-139	1.16154e-135	0.42	0.2	hypothetical protein, unknown function	N/A
2	LmjF.27.1770	0.605708	4.19574e-123	3.43086e-119	0.244	0.094	Frag1/DRAM/Sfk1 family, putative	N/A
2	LmjF.31.0900	0.604371	1.46067e-149	1.19439e-145	0.821	0.619	hypothetical protein, conserved	N/A
2	LmjF.30.3630	0.603079	2.97378e-143	2.43166e-139	0.259	0.094	CYC2-like protein, putative	protein kinase binding
2	LmjF.28.2910	0.596798	3.99032e-127	3.26289e-123	0.379	0.178	glutamate dehydrogenase, putative	oxidoreductase activity;oxidoreductase activity, acting on the CH-NH2 group of donors, NAD or NADP as acceptor
2	LmjF.23.0140	0.594485	3.65473e-130	2.98847e-126	0.203	0.068	Alpha/beta hydrolase family, putative	N/A
2	LmjF.31.2330	0.593783	3.52927e-116	2.88588e-112	0.33	0.151	3,2-trans-enoyl-CoA isomerase, mitochondrial precursor, putative	catalytic activity
2	LmjF.27.1080	0.590042	8.6707e-81	7.09003e-77	0.515	0.337	hypothetical protein, conserved	protein binding
2	LmjF.29.0280	0.58755	3.68791e-109	3.0156e-105	0.639	0.426	D-lactate dehydrogenase-like protein	FAD binding;catalytic activity;flavin adenine dinucleotide binding;oxidoreductase activity
2	LmjF.26.1530	0.58737	2.59642e-133	2.1231e-129	0.271	0.105	RNA recognition motif. (a.k.a. RRM, RBD, or RNP domain), putative	nucleic acid binding
2	LmjF.32.1610	0.58507	2.15613e-133	1.76307e-129	0.235	0.084	hypothetical protein, conserved	N/A
2	LmjF.31.0720	0.581579	9.32731e-118	7.62694e-114	0.367	0.175	major facilitator superfamily, putative	transmembrane transporter activity
2	LmjF.16.1310	0.581347	4.20875e-123	3.44149e-119	0.579	0.34	cytochrome c, putative	electron transfer activity;heme binding
2	LmjF.29.1270	0.580249	2.62715e-147	2.14822e-143	0.212	0.067	Heat shock protein 100 kDa	ATP binding;ATPase activity
2	LmjF.02.0540	0.577724	5.22941e-165	4.27609e-161	0.158	0.036	hypothetical protein, conserved	N/A
2	LmjF.23.0840	0.57531	7.40211e-140	6.05271e-136	0.213	0.07	hypothetical protein, unknown function	N/A
2	LmjF.35.3520	0.574439	1.02882e-132	8.41269e-129	0.214	0.073	NLI interacting factor-like phosphatase, putative	N/A
2	LmjF.31.2115	0.573542	6.26405e-125	5.12211e-121	0.183	0.059	hypothetical protein, unknown function	N/A
2	LmjF.20.1370	0.573187	1.92101e-134	1.57081e-130	0.216	0.073	pumilio protein 9, putative	RNA binding
2	LmjF.06.0290	0.566074	3.66797e-165	2.9993e-161	0.126	0.023	ribonuclease H1, putative	RNA-DNA hybrid ribonuclease activity;magnesium ion binding;nucleic acid binding
2	LmjF.17.0083	0.565962	7.4325e-154	6.07755e-150	0.943	0.864	elongation factor 1-alpha	GTP binding;GTPase activity;translation elongation factor activity
2	LmjF.21.1860	0.5658	1.76157e-129	1.44044e-125	0.854	0.697	beta tubulin	GTP binding;GTPase activity;structural constituent of cytoskeleton
2	LmjF.28.0550	0.565327	2.51271e-130	2.05464e-126	0.326	0.14	DNA repair protein RAD51, putative	ATP binding;DNA binding;DNA-dependent ATPase activity;double-stranded DNA binding;nucleotide binding;recombinase activity;single-stranded DNA binding
2	LmjF.33.0160	0.565102	1.39839e-132	1.14346e-128	0.193	0.061	hypothetical protein, unknown function	N/A
2	LmjF.04.1110	0.562379	2.14566e-136	1.75451e-132	0.168	0.047	proton motive ATPase, putative	nucleotide binding
2	LmjF.20.1330	0.558581	1.72109e-130	1.40734e-126	0.191	0.061	protein kinase, putative	ATP binding;protein kinase activity
2	LmjF.31.0450	0.553444	6.73656e-189	5.50848e-185	0.987	0.966	amastin, putative	N/A
2	LmjF.07.0805	0.550491	2.58753e-137	2.11582e-133	0.141	0.035	N-acetylglucosamine-phosphate mutase, putative	intramolecular transferase activity, phosphotransferases;magnesium ion binding;phosphoacetylglucosamine mutase activity
2	LmjF.33.3030	0.548752	8.99165e-124	7.35247e-120	0.245	0.094	hypothetical protein, unknown function	N/A
2	LmjF.31.2960	0.548217	9.98747e-124	8.16675e-120	0.631	0.381	Repressor of differentiation kinase 2, putative	ATP binding;protein kinase activity
2	LmjF.13.1310	0.546451	1.27964e-130	1.04636e-126	0.397	0.185	hypothetical protein, unknown function	N/A
2	LmjF.34.0980	0.545292	1.10571e-119	9.04135e-116	0.387	0.188	amastin-like protein	N/A
2	LmjF.12.0500	0.545259	5.27845e-121	4.31619e-117	0.323	0.143	hypothetical protein, unknown function	N/A
2	LmjF.31.1510	0.544198	6.95506e-116	5.68715e-112	0.317	0.143	hypothetical protein, conserved	N/A
2	LmjF.04.0440	0.543657	1.6833e-117	1.37644e-113	0.23	0.087	STE/STE11 serine/threonine-protein kinase, putative	ATP binding;protein kinase activity
2	LmjF.11.0580	0.543297	1.09757e-130	8.97482e-127	0.17	0.05	cytochrome b5, putative	N/A
2	LmjF.28.1570	0.542006	6.41565e-102	5.24608e-98	0.391	0.203	hydrolase, alpha/beta fold family, putative	N/A
2	LmjF.31.1165	0.54014	1.40011e-122	1.14487e-118	0.214	0.076	hypothetical protein	N/A
2	LmjF.24.0360	0.539752	3.25789e-112	2.66398e-108	0.394	0.198	UDP-galactose transporter	pyrimidine nucleotide-sugar transmembrane transporter activity
2	LmjF.31.1190	0.539646	3.41206e-132	2.79004e-128	0.173	0.051	cytochrome b5-like Heme/Steroid binding domain containing protein, putative	N/A
2	LmjF.04.0200	0.539339	6.59033e-110	5.38891e-106	0.412	0.21	surface antigen-like protein	N/A
2	LmjF.10.0080	0.535291	1.71713e-136	1.4041e-132	0.188	0.058	hypothetical protein, unknown function	N/A
2	LmjF.31.2170	0.534835	4.02599e-109	3.29205e-105	0.305	0.139	ARM-like helical domain-containing protein	N/A
2	LmjF.35.1270	0.534604	1.85822e-136	1.51947e-132	0.112	0.022	hypothetical protein, conserved	N/A
2	LmjF.30.0800	0.534372	3.48129e-115	2.84665e-111	0.21	0.077	rac serine-threonine kinase, putative	ATP binding;protein kinase activity;protein serine/threonine kinase activity
2	LmjF.29.1720	0.533663	5.74015e-96	4.69372e-92	0.538	0.327	histone H2A, putative	DNA binding;protein heterodimerization activity
2	LmjF.33.2830	0.531816	2.37615e-103	1.94298e-99	0.391	0.202	cysteine peptidase, Clan CA, family C51, putative	N/A
2	LmjF.31.1090	0.530641	2.63356e-123	2.15346e-119	0.217	0.077	hypothetical protein, conserved	N/A
2	LmjF.33.0960	0.530382	3.09076e-122	2.52731e-118	0.206	0.072	nicotinate phosphoribosyltransferase, putative	nicotinate phosphoribosyltransferase activity;nicotinate-nucleotide diphosphorylase (carboxylating) activity
2	LmjF.14.0980	0.529527	2.89642e-118	2.3684e-114	0.248	0.097	sodium/hydrogen exchanger, putative	solute:proton antiporter activity
2	LmjF.14.1070	0.526963	1.88479e-119	1.54119e-115	0.212	0.076	CMGC/DYRK protein kinase, putative	ATP binding;protein kinase activity
2	LmjF.31.3080	0.525187	1.14522e-144	9.36442e-141	0.149	0.036	hypothetical protein, conserved	N/A
2	LmjF.07.0745	0.523835	3.00764e-123	2.45935e-119	0.154	0.044	hypothetical protein	N/A
2	LmjF.15.1260	0.52339	4.04869e-122	3.31062e-118	0.208	0.073	SET domain containing protein, putative	protein binding
2	LmjF.15.0185	0.522893	1.13537e-107	9.28389e-104	0.279	0.122	hypothetical protein, conserved	N/A
2	LmjF.18.1190	0.521931	3.7019e-125	3.02704e-121	0.142	0.038	hypothetical protein, conserved	N/A
2	LmjF.27.1200	0.518903	1.09828e-110	8.98067e-107	0.398	0.2	RING-H2 zinc finger, putative	N/A
2	LmjF.17.0600	0.518693	2.81998e-109	2.30589e-105	0.275	0.118	P-type ATPase, putative	nucleotide binding
2	LmjF.35.1900	0.514529	5.49996e-84	4.49732e-80	0.621	0.418	60S ribosomal protein L5, putative	5S rRNA binding;structural constituent of ribosome
2	LmjF.18.1150	0.514299	6.24731e-119	5.10843e-115	0.203	0.071	Zinc finger, C3HC4 type (RING finger), putative	N/A
2	LmjF.06.0310	0.510964	1.59351e-99	1.30301e-95	0.285	0.13	folate/biopterin transporter, putative	N/A
2	LmjF.32.3130	0.510376	1.43469e-73	1.17314e-69	0.725	0.553	ribosomal protein L3, putative	structural constituent of ribosome
2	LmjF.18.0130	0.509629	1.20706e-112	9.87011e-109	0.23	0.089	Domain of unknown function DUF21, putative	N/A
2	LmjF.22.0810	0.508208	1.97864e-104	1.61793e-100	0.252	0.106	calcium/calmodulin-dependent protein kinase, putative	ATP binding;protein kinase activity
2	LmjF.30.1420	0.507278	4.65065e-115	3.80284e-111	0.185	0.063	ama1 protein, putative	N/A
2	LmjF.36.4640	0.506572	1.56393e-102	1.27883e-98	0.192	0.071	Esterase PHB depolymerase, putative	hydrolase activity
2	LmjF.16.0895	0.503867	1.11969e-110	9.15573e-107	0.218	0.083	hypothetical protein, conserved	N/A
2	LmjF.31.2220	0.501844	4.18831e-99	3.42478e-95	0.246	0.105	hypothetical protein, unknown function	N/A
2	LmjF.20.1200	0.501492	3.56218e-107	2.9128e-103	0.182	0.064	calpain-like cysteine peptidase, putative	calcium-dependent cysteine-type endopeptidase activity
2	LmjF.29.1810	0.500397	1.90486e-100	1.5576e-96	0.258	0.112	Vesicle coat protein involved in Golgi to plasma membrane transport, putative	guanyl-nucleotide exchange factor activity
2	LmjF.31.0500	0.497313	2.72162e-100	2.22547e-96	0.196	0.074	hypothetical protein, conserved	N/A
2	LmjF.22.0610	0.496799	2.62986e-101	2.15044e-97	0.233	0.096	ubiquitin-conjugating enzyme-like protein	N/A
2	LmjF.16.0800	0.496495	1.42067e-96	1.16168e-92	0.268	0.121	membrane transport protein, putative	N/A
2	LmjF.01.0770	0.495929	6.24988e-101	5.11053e-97	0.723	0.515	Eukaryotic initiation factor 4A-1	ATP binding;helicase activity;nucleic acid binding
2	LmjF.14.1095	0.493863	4.73718e-110	3.87359e-106	0.207	0.076	hypothetical protein, unknown function	N/A
2	LmjF.05.0350	0.493437	2.82715e-87	2.31176e-83	0.407	0.225	trypanothione reductase	disulfide oxidoreductase activity;flavin adenine dinucleotide binding;oxidoreductase activity;oxidoreductase activity, acting on a sulfur group of donors, NAD(P) as acceptor
2	LmjF.19.1005	0.493089	1.39548e-98	1.14108e-94	0.338	0.167	4-coumarate:coa ligase-like protein	N/A
2	LmjF.11.1040	0.489895	3.24931e-94	2.65696e-90	0.336	0.168	hypothetical protein, conserved	N/A
2	LmjF.33.1870	0.487755	1.31718e-103	1.07706e-99	0.254	0.107	nucleolar GTP-binding protein, putative	GTP binding
2	LmjF.31.3070	0.486498	1.97054e-105	1.61131e-101	0.19	0.068	iron/zinc transporter protein-like protein	metal ion transmembrane transporter activity
2	LmjF.24.0430	0.486202	1.88463e-113	1.54106e-109	0.194	0.068	hypothetical protein, unknown function	N/A
2	LmjF.32.0640	0.484003	1.0738e-91	8.7805e-88	0.29	0.138	phosphatase, putative	phosphatase activity;protein tyrosine phosphatase activity;protein tyrosine/serine/threonine phosphatase activity
2	LmjF.31.1850	0.483429	2.42691e-100	1.98449e-96	0.288	0.131	hypothetical protein, unknown function	N/A
2	LmjF.35.4380	0.483211	2.01652e-84	1.64891e-80	0.556	0.356	hypothetical protein, conserved	N/A
2	LmjF.25.1750	0.482515	8.78381e-98	7.18252e-94	0.272	0.122	Domain of unknown function (DUF1935), putative	N/A
2	LmjF.13.0450	0.479362	2.30642e-124	1.88596e-120	0.883	0.732	ALBA-domain protein 1	nucleic acid binding
2	LmjF.25.0690	0.4772	1.03461e-102	8.46e-99	0.238	0.097	hypothetical protein, conserved	N/A
2	LmjF.31.1395	0.475238	1.18783e-107	9.71291e-104	0.346	0.164	zinc finger domain, LSD1 subclass, putative	N/A
2	LmjF.36.4680	0.474431	1.55153e-97	1.26869e-93	0.484	0.274	hypothetical protein, conserved	N/A
2	LmjF.21.1580	0.468993	1.97736e-89	1.61689e-85	0.407	0.223	hypothetical protein, unknown function	N/A
2	LmjF.31.2790	0.468982	1.94434e-92	1.58989e-88	0.452	0.253	ADP-ribosylation factor, putative	GTP binding
2	LmjF.34.2460	0.468252	6.28553e-131	5.13968e-127	0.11	0.022	Elongation factor Tu GTP binding domain containing protein, putative	GTP binding;GTPase activity
2	LmjF.29.1730	0.467989	1.4218e-84	1.16261e-80	0.304	0.151	histone H2A, putative	DNA binding;protein heterodimerization activity
2	LmjF.36.0970	0.467954	5.25494e-82	4.29696e-78	0.308	0.156	hypothetical protein, conserved	N/A
2	LmjF.21.1610	0.465904	9.39389e-107	7.68139e-103	0.265	0.112	hypothetical protein, conserved	N/A
2	LmjF.24.0760	0.464749	1.08733e-77	8.89108e-74	0.616	0.422	DNA repair and recombination protein RAD54, putative	ATP binding
2	LmjF.18.1370	0.463561	2.71798e-82	2.22249e-78	0.355	0.19	heat shock protein 110, putative	N/A
2	LmjF.31.0760	0.460917	1.19055e-89	9.73516e-86	0.343	0.175	hypothetical protein, unknown function	N/A
2	LmjF.19.1280	0.459001	2.7122e-97	2.21777e-93	0.258	0.113	SPFH domain / Band 7 family, putative	N/A
2	LmjF.10.0210	0.458176	1.63524e-93	1.33713e-89	0.466	0.263	nucleolar protein 56, putative	N/A
2	LmjF.07.0400	0.45753	9.07821e-82	7.42325e-78	0.159	0.061	EamA-like transporter family, putative	N/A
2	LmjF.33.2930	0.456475	3.08525e-89	2.52281e-85	0.24	0.106	Present in the outer mitochondrial membrane proteome 22	N/A
2	LmjF.25.0770	0.455358	3.17868e-92	2.59921e-88	0.456	0.255	hypothetical protein, unknown function	N/A
2	LmjF.36.4300	0.45403	1.63354e-96	1.33575e-92	0.163	0.057	trypanothione synthetase-like protein	N/A
2	LmjF.12.0995	0.453594	1.65438e-92	1.35279e-88	0.166	0.06	hypothetical protein	N/A
2	LmjF.28.2770	0.452688	0	0	1	0.998	heat-shock protein hsp70, putative	N/A
2	LmjF.36.3800	0.451394	2.59765e-85	2.1241e-81	0.579	0.37	aminomethyltransferase, mitochondrial, putative	aminomethyltransferase activity;protein binding
2	LmjF.24.1770	0.451363	1.33678e-86	1.09308e-82	0.253	0.116	inhibitor of cysteine peptidase	N/A
2	LmjF.17.0330	0.450701	5.32978e-96	4.35816e-92	0.145	0.047	hypothetical protein, conserved	N/A
2	LmjF.15.0160	0.450214	2.47493e-93	2.02375e-89	0.33	0.163	zinc finger (CCCH type) protein, putative	metal ion binding
2	LmjF.06.0590	0.449164	3.63967e-80	2.97616e-76	0.197	0.084	hypothetical protein, conserved	N/A
2	LmjF.31.0730	0.448073	2.35085e-94	1.92229e-90	0.409	0.217	hypothetical protein, unknown function	N/A
2	LmjF.29.2240	0.447967	4.06682e-85	3.32543e-81	0.381	0.206	Aminopeptidase M1, putative	metallopeptidase activity;zinc ion binding
2	LmjF.14.0480	0.447053	1.06502e-77	8.70867e-74	0.214	0.097	hypothetical protein, unknown function	N/A
2	LmjF.30.3120	0.44696	9.93695e-89	8.12544e-85	0.387	0.207	S-adenosylmethionine decarboxylase proenzyme- like, putative	adenosylmethionine decarboxylase activity
2	LmjF.27.1780	0.446649	2.68411e-81	2.1948e-77	0.204	0.087	casein kinase I-like protein	ATP binding;protein kinase activity
2	LmjF.29.1120	0.446328	5.21677e-78	4.26575e-74	0.277	0.138	PSP1 C-terminal conserved region, putative	N/A
2	LmjF.32.1810	0.446286	2.72563e-80	2.22875e-76	0.201	0.086	Serine/threonine-protein kinase NEK21, putative	ATP binding;protein kinase activity
2	LmjF.16.0910	0.444551	1.35813e-112	1.11054e-108	0.124	0.032	flagellar calcium-binding protein, putative	N/A
2	LmjF.33.3020	0.444431	1.41615e-80	1.15798e-76	0.216	0.095	hypothetical protein, unknown function	N/A
2	LmjF.02.0160	0.441828	3.14436e-81	2.57114e-77	0.151	0.056	phosphoglycan beta 1,3 galactosyltransferase	N/A
2	LmjF.31.2890	0.440616	3.91872e-83	3.20434e-79	0.167	0.064	Region in Clathrin and VPS, putative	protein binding
2	LmjF.26.1500	0.44029	2.16814e-92	1.77288e-88	0.281	0.13	hypothetical protein, unknown function	N/A
2	LmjF.30.2130	0.440013	4.61366e-89	3.77259e-85	0.195	0.078	Serine/threonine-protein kinase NEK10, putative	ATP binding;protein kinase activity;zinc ion binding
2	LmjF.31.2700	0.438794	8.22795e-84	6.72799e-80	0.15	0.054	hypothetical protein, conserved	N/A
2	LmjF.23.1170	0.438564	2.61387e-89	2.13736e-85	0.314	0.154	membrane-bound acid phosphatase 2	N/A
2	LmjF.25.1210	0.437921	1.17362e-79	9.59667e-76	0.188	0.078	hypothetical protein, conserved	protein binding
2	LmjF.12.1140	0.437788	1.17899e-73	9.64058e-70	0.216	0.1	n-ethylmaleimide reductase-like protein	FMN binding;catalytic activity;oxidoreductase activity
2	LmjF.34.0175	0.437759	2.28328e-86	1.86703e-82	0.203	0.084	hypothetical protein	N/A
2	LmjF.31.2000	0.437574	3.34754e-73	2.73728e-69	0.435	0.257	GP63-like protein, leishmanolysin-like protein	metalloendopeptidase activity
2	LmjF.36.5900	0.434505	7.24738e-91	5.92618e-87	0.158	0.056	choline/ethanolamine phosphotransferase, putative	phosphotransferase activity, for other substituted phosphate groups
2	LmjF.30.2800	0.433369	8.46518e-90	6.92198e-86	0.128	0.04	hypothetical protein, conserved	N/A
2	LmjF.34.1410	0.431728	4.74857e-101	3.88291e-97	0.909	0.815	d-isomer specific 2-hydroxyacid dehydrogenase- like protein	NAD binding
2	LmjF.23.0450	0.430931	1.04123e-94	8.51411e-91	0.146	0.048	permease-like protein	N/A
2	LmjF.35.3920	0.427553	1.30359e-79	1.06594e-75	0.3	0.151	hypothetical protein, conserved	N/A
2	LmjF.20.0150	0.427057	1.8191e-76	1.48748e-72	0.272	0.134	Domain of unknown function (DUF1736), putative	protein binding
2	LmjF.26.0030	0.426467	1.60544e-94	1.31277e-90	0.138	0.044	pyridoxal phosphate containing glycine decarboxylase, putative	catalytic activity;glycine dehydrogenase (decarboxylating) activity
2	LmjF.34.0760	0.426127	1.86543e-81	1.52536e-77	0.153	0.057	hypothetical protein, conserved	N/A
2	LmjF.27.0840	0.425105	7.66594e-77	6.26844e-73	0.184	0.077	hypothetical protein, conserved	N/A
2	LmjF.26.2100	0.425003	2.30738e-96	1.88674e-92	0.116	0.032	kinetoplastid-specific phospho-protein phosphatase, putative	hydrolase activity
2	LmjF.33.1850	0.422965	9.74147e-87	7.9656e-83	0.196	0.08	hypothetical protein, unknown function	N/A
2	LmjF.23.0547	0.422644	5.25551e-89	4.29743e-85	0.182	0.07	hypothetical protein, conserved	N/A
2	LmjF.10.1100	0.42249	9.23217e-90	7.54914e-86	0.243	0.107	hypothetical protein, conserved	N/A
2	LmjF.31.2920	0.421795	3.23444e-78	2.6448e-74	0.175	0.071	inositol polyphosphate 1-phosphatase, putative	N/A
2	LmjF.05.0710	0.421639	6.04874e-92	4.94605e-88	0.385	0.201	CYC2-like cyclin, putative	protein kinase binding
2	LmjF.23.1665	0.421126	4.17655e-76	3.41517e-72	0.126	0.044	PAP2 superfamily, putative	hydrolase activity
2	LmjF.20.0355	0.420473	1.26242e-90	1.03228e-86	0.145	0.049	hypothetical protein	N/A
2	LmjF.31.3030	0.419512	2.60439e-82	2.12961e-78	0.196	0.082	hypothetical protein, unknown function	N/A
2	LmjF.36.0150	0.41938	3.31049e-94	2.70699e-90	0.106	0.028	6-phosphofructo-2-kinase/fructose-2,6-bisphosphatas, putative	ATP binding;catalytic activity
2	LmjF.01.0170	0.418664	3.3679e-86	2.75393e-82	0.364	0.189	hypothetical protein, conserved	N/A
2	LmjF.15.1230	0.418109	4.97983e-95	4.07201e-91	0.112	0.031	nucleoside transporter 1, putative	nucleoside transmembrane transporter activity
2	LmjF.15.1040	0.417257	2.99577e-67	2.44964e-63	0.389	0.227	tryparedoxin peroxidase	antioxidant activity;oxidoreductase activity;peroxiredoxin activity
2	LmjF.19.0870	0.417227	8.46499e-51	6.92182e-47	0.265	0.147	ATG8/AUT7/APG8/PAZ2, putative	N/A
2	LmjF.19.1450	0.416976	1.2695e-76	1.03807e-72	0.225	0.103	oxidoreductase-like protein	oxidoreductase activity
2	LmjF.36.1720	0.416425	4.52169e-92	3.69738e-88	0.12	0.035	neurobeachin/beige protein, putative	protein binding
2	LmjF.12.0090	0.415491	6.98239e-85	5.7095e-81	0.202	0.084	hypothetical protein, conserved	N/A
2	LmjF.36.2380	0.415326	8.62978e-84	7.05657e-80	0.479	0.278	sterol 24-c-methyltransferase, putative	methyltransferase activity
2	LmjF.11.0040	0.415272	1.36577e-73	1.11679e-69	0.145	0.055	ATP-binding cassette protein subfamily H, member 1, putative	ATP binding;ATPase activity
2	LmjF.19.1365	0.414341	1.38873e-74	1.13557e-70	0.252	0.122	hypothetical protein, conserved	N/A
2	LmjF.35.4820	0.413118	1.80795e-74	1.47836e-70	0.158	0.063	Histidine phosphatase superfamily (branch 1), putative	N/A
2	LmjF.02.0050	0.412598	2.40617e-65	1.96752e-61	0.207	0.099	cytochrome b-domain protein, putative	heme binding
2	LmjF.04.0410	0.412596	2.40153e-77	1.96373e-73	0.191	0.081	hypothetical protein, conserved	N/A
2	LmjF.36.5620	0.412102	3.7101e-82	3.03375e-78	0.193	0.08	isoleucyl-tRNA synthetase, putative	ATP binding;aminoacyl-tRNA editing activity;aminoacyl-tRNA ligase activity;isoleucine-tRNA ligase activity;nucleotide binding;tRNA binding
2	LmjF.31.0950	0.411611	1.47397e-97	1.20526e-93	0.102	0.025	sodium stibogluconate resistance protein, putative	N/A
2	LmjF.31.1350	0.41018	8.42888e-81	6.89229e-77	0.169	0.066	hypothetical protein, unknown function	N/A
2	LmjF.35.3470	0.409915	1.41804e-78	1.15953e-74	0.163	0.063	acyl transferase-like protein, putative	N/A
2	LmjF.36.2610	0.409536	5.56239e-85	4.54836e-81	0.266	0.124	folylpolyglutamate synthetase	ATP binding;ligase activity;tetrahydrofolylpolyglutamate synthase activity
2	LmjF.29.2540	0.409015	1.9544e-75	1.59811e-71	0.247	0.118	NOL1/NOP2/sun family, putative	methyltransferase activity
2	LmjF.14.1045	0.408412	1.49972e-88	1.22632e-84	0.1	0.027	hypothetical protein, conserved	N/A
2	LmjF.33.2110	0.408187	5.50665e-81	4.50279e-77	0.211	0.092	phosphoglycerate mutase, putative	N/A
2	LmjF.36.4100	0.408048	1.3995e-82	1.14437e-78	0.17	0.066	glycosyl hydrolase-like protein	hydrolase activity, hydrolyzing O-glycosyl compounds
2	LmjF.31.1970	0.407438	7.92098e-76	6.47698e-72	0.264	0.13	tryparedoxin 4, putative	N/A
2	LmjF.30.2540	0.406943	1.32527e-93	1.08368e-89	0.103	0.027	AAA family ATPase-like protein	ATP binding;ATPase activity
2	LmjF.24.2150	0.406913	2.34748e-77	1.91954e-73	0.236	0.11	hypothetical protein, unknown function	N/A
2	LmjF.13.0200	0.405954	3.7799e-67	3.09083e-63	0.219	0.105	Lipase (class 3), putative	N/A
2	LmjF.25.2130	0.404756	9.54323e-70	7.8035e-66	0.27	0.138	succinyl-CoA synthetase alpha subunit, putative	catalytic activity
2	LmjF.34.2910	0.404191	8.83645e-71	7.22557e-67	0.208	0.096	patatin-like phospholipase, putative	hydrolase activity
2	LmjF.33.1380	0.404185	5.0193e-77	4.10428e-73	0.436	0.253	mitogen-activated protein kinase 11, putative	ATP binding;protein kinase activity
2	LmjF.27.1870	0.403674	6.06088e-71	4.95598e-67	0.464	0.282	trypanothione synthetase	N/A
2	LmjF.12.0120	0.402803	2.86241e-72	2.34059e-68	0.374	0.21	hypothetical protein, conserved	N/A
2	LmjF.26.0730	0.40183	5.43694e-73	4.44578e-69	0.277	0.14	hypothetical protein, conserved	N/A
2	LmjF.18.0990	0.401	7.12145e-82	5.82321e-78	0.142	0.05	UDP-glucose pyrophosphorylase	UTP:glucose-1-phosphate uridylyltransferase activity;uridylyltransferase activity
2	LmjF.10.1250	0.400595	9.9336e-76	8.12271e-72	0.323	0.169	Protein of unknown function (DUF1861), putative	N/A
2	LmjF.11.0610	0.399695	8.83688e-72	7.22592e-68	0.278	0.142	conserved protein, unknown function	N/A
2	LmjF.01.0690	0.399324	3.6301e-76	2.96833e-72	0.164	0.065	PLAC8 family, putative	N/A
2	LmjF.18.1480	0.399113	2.32329e-83	1.89976e-79	0.217	0.094	NADH-ubiquinone oxidoreductase complex I subunit, putative	NADH dehydrogenase (ubiquinone) activity;electron transfer activity;iron-sulfur cluster binding;oxidoreductase activity
2	LmjF.29.2570	0.397722	2.29816e-77	1.8792e-73	0.428	0.244	Serine/threonine-protein kinase NEK7, putative	ATP binding;protein kinase activity
2	LmjF.36.3590	0.39714	1.99104e-82	1.62807e-78	0.3	0.149	cysteine synthase	cysteine synthase activity
2	LmjF.06.0450	0.396404	4.67359e-71	3.82159e-67	0.262	0.131	hypothetical protein, unknown function	N/A
2	LmjF.32.2910	0.396404	5.65248e-82	4.62204e-78	0.296	0.146	ubiquitin hydrolase, putative	thiol-dependent ubiquitin-specific protease activity
2	LmjF.12.0890	0.396139	1.99335e-80	1.62996e-76	0.135	0.047	promastigote surface antigen 38S	N/A
2	LmjF.19.1300	0.395785	2.0989e-68	1.71627e-64	0.293	0.155	hypothetical protein, unknown function	ATP binding;protein kinase activity
2	LmjF.31.2410	0.395597	1.02876e-60	8.41213e-57	0.256	0.135	hypothetical protein, unknown function	N/A
2	LmjF.31.0850	0.39534	5.64177e-75	4.61328e-71	0.289	0.147	hypothetical protein	N/A
2	LmjF.19.0100	0.394976	6.24205e-56	5.10413e-52	0.421	0.265	fibrillarin, putative	RNA binding;methyltransferase activity
2	LmjF.26.2040	0.394436	1.52852e-72	1.24987e-68	0.186	0.081	PQ loop repeat, putative	N/A
2	LmjF.17.0390	0.393484	3.22386e-84	2.63615e-80	0.128	0.042	STE group serine/threonine-protein kinase, putative	ATP binding;protein kinase activity
2	LmjF.30.0860	0.392923	5.15702e-103	4.21689e-99	0.899	0.767	surface protein amastin, putative	N/A
2	LmjF.32.3100	0.392407	1.89217e-73	1.54722e-69	0.148	0.057	hypothetical protein, unknown function	N/A
2	LmjF.31.1860	0.392177	1.05242e-71	8.60562e-68	0.517	0.319	hypothetical protein, unknown function	N/A
2	LmjF.27.2210	0.39088	2.68545e-74	2.19589e-70	0.365	0.2	kinetoplastid-specific dual specificity phosphatase, putative	phosphatase activity;protein tyrosine/serine/threonine phosphatase activity
2	LmjF.19.0570	0.390146	5.11158e-76	4.17974e-72	0.336	0.178	hypothetical protein, conserved	N/A
2	LmjF.32.3870	0.389533	7.1361e-68	5.83519e-64	0.297	0.159	myosin XXI, putative	ATP binding;motor activity;protein binding
2	LmjF.30.0390	0.389239	1.12035e-69	9.16109e-66	0.262	0.132	hypothetical protein, unknown function	N/A
2	LmjF.34.3530	0.38872	1.51608e-74	1.2397e-70	0.144	0.054	hypothetical protein, conserved	N/A
2	LmjF.33.1930	0.3885	1.11794e-79	9.14136e-76	0.215	0.094	phosphoribosylpyrophosphate synthetase, putative	magnesium ion binding;ribose phosphate diphosphokinase activity
2	LmjF.34.0500	0.387995	1.16817e-59	9.55212e-56	0.694	0.52	amastin-like protein	N/A
2	LmjF.15.0370	0.387873	1.06831e-63	8.73558e-60	0.238	0.12	60S acidic ribosomal protein, putative	structural constituent of ribosome
2	LmjF.31.0840	0.387804	9.77514e-83	7.99313e-79	0.183	0.073	lipase precursor-like protein	N/A
2	LmjF.21.1480	0.386588	1.40565e-45	1.1494e-41	0.407	0.272	hypothetical protein, conserved	N/A
2	LmjF.29.2270	0.386547	1.29897e-74	1.06217e-70	0.121	0.041	acyltransferase, putative	transferase activity, transferring acyl groups
2	LmjF.11.1020	0.386374	1.2478e-66	1.02032e-62	0.2	0.092	hypothetical protein, conserved	N/A
2	LmjF.36.1530	0.386348	4.03103e-73	3.29618e-69	0.287	0.146	NEK family Serine/threonine-protein kinase, putative	ATP binding;protein kinase activity
2	LmjF.09.0330	0.385945	2.05597e-74	1.68116e-70	0.204	0.09	hypothetical protein, conserved	N/A
2	LmjF.16.0950	0.385484	2.40567e-65	1.96712e-61	0.396	0.234	sucrose-phosphate synthase-like protein	N/A
2	LmjF.30.0890	0.385365	1.11448e-79	9.11308e-76	0.132	0.045	adenosine kinase-like protein	adenosine kinase activity
2	LmjF.36.1930	0.384975	1.20946e-70	9.88973e-67	0.406	0.235	Ring finger domain containing protein, putative	metal ion binding
2	LmjF.31.1940	0.384872	1.97395e-76	1.6141e-72	0.425	0.242	transcription like protein nupm1, putative	N/A
2	LmjF.35.0010	0.384842	2.73054e-82	2.23276e-78	0.13	0.043	phosphoglycan beta 1,3 galactosyltransferase 7	N/A
2	LmjF.10.0930	0.384567	1.02226e-78	8.35904e-75	0.134	0.047	hypothetical protein, conserved (pseudogene)	N/A
2	LmjF.34.3470	0.384293	6.56014e-70	5.36422e-66	0.378	0.215	amidinotransferase, putative	N/A
2	LmjF.07.0230	0.38264	8.33937e-58	6.8191e-54	0.284	0.157	Cytokine-induced anti-apoptosis inhibitor 1, Fe-S biogenesis, putative	iron-sulfur cluster binding
2	LmjF.30.0850	0.382241	1.00578e-62	8.22424e-59	0.516	0.334	surface protein amastin, putative	N/A
2	LmjF.09.0890	0.381758	7.5087e-65	6.13987e-61	0.289	0.154	phospholipid transporting ATPase-like protein, putative	ATP binding;ATPase-coupled intramembrane lipid transporter activity;magnesium ion binding;nucleotide binding
2	LmjF.30.1670	0.380723	5.26489e-67	4.3051e-63	0.239	0.118	hypothetical protein, conserved	unfolded protein binding
2	LmjF.31.0390	0.380268	1.1636e-69	9.51476e-66	0.276	0.141	Calpain-like protein 2	calcium-dependent cysteine-type endopeptidase activity
2	LmjF.27.1340	0.379256	2.5113e-74	2.05349e-70	0.187	0.08	hypothetical protein, unknown function	N/A
2	LmjF.06.0370	0.379052	5.26292e-68	4.30349e-64	0.388	0.222	glutamine synthetase, putative	catalytic activity;glutamate-ammonia ligase activity
2	LmjF.22.0490	0.3789	6.50969e-70	5.32297e-66	0.362	0.202	glycogen synthase kinase-3 alpha, putative	ATP binding;protein kinase activity
2	LmjF.13.0780	0.378451	5.62017e-72	4.59562e-68	0.168	0.069	CMGC/MAPK protein kinase, putative	ATP binding;protein kinase activity
2	LmjF.18.1340	0.378389	8.57069e-73	7.00825e-69	0.447	0.265	hypothetical protein, conserved	metal ion binding
2	LmjF.16.0600	0.377862	4.80308e-62	3.92748e-58	0.664	0.48	histone H3, putative	DNA binding;protein heterodimerization activity
2	LmjF.16.1520	0.377679	1.0857e-70	8.8778e-67	0.22	0.102	hypothetical protein, conserved	N/A
2	LmjF.02.0590	0.377482	8.85785e-73	7.24306e-69	0.175	0.073	TPR repeat/Tetratricopeptide repeat, putative	protein binding
2	LmjF.27.2050	0.377109	5.83513e-74	4.77138e-70	0.396	0.223	ribonucleoside-diphosphate reductase small chain, putative	oxidoreductase activity
2	LmjF.08.0010	0.37708	1.96262e-72	1.60483e-68	0.24	0.114	adaptor complex protein (AP) 3 delta subunit 1, putative	ATP binding;protein binding
2	LmjF.01.0335	0.376831	3.02067e-74	2.47001e-70	0.173	0.071	Mitochondrial pyruvate carrier 1	N/A
2	LmjF.12.0490	0.37663	7.28943e-80	5.96057e-76	0.107	0.032	hypothetical protein, unknown function	N/A
2	LmjF.35.0920	0.376356	2.3581e-77	1.92822e-73	0.282	0.139	hypothetical protein, conserved	N/A
2	LmjF.36.2090	0.375781	2.10873e-68	1.72431e-64	0.181	0.079	hypothetical protein, conserved	N/A
2	LmjF.22.0630	0.373471	1.73252e-77	1.41668e-73	0.177	0.072	hypothetical protein, unknown function	N/A
2	LmjF.18.1520	0.37338	3.1476e-63	2.57379e-59	0.375	0.218	P-type H+-ATPase, putative	nucleotide binding;proton-exporting ATPase activity, phosphorylative mechanism
2	LmjF.28.1120	0.37327	5.85784e-75	4.78996e-71	0.228	0.105	hypothetical protein, conserved	N/A
2	LmjF.22.0690	0.372479	9.18866e-70	7.51356e-66	0.155	0.063	3'a2rel-related protein	N/A
2	LmjF.32.1240	0.371597	1.8705e-69	1.52951e-65	0.137	0.052	Bardet-Biedl syndrome 9 protein	N/A
2	LmjF.31.2520	0.371537	1.95367e-81	1.59752e-77	0.162	0.061	hypothetical protein, conserved	N/A
2	LmjF.35.2170	0.370337	2.05778e-67	1.68265e-63	0.174	0.075	short chain dehydrogenase, putative	N/A
2	LmjF.12.0660	0.370312	1.75086e-72	1.43168e-68	0.155	0.062	ser/thr protein phosphatase, putative	calcium ion binding;hydrolase activity
2	LmjF.31.1810	0.370299	3.15504e-61	2.57987e-57	0.312	0.174	acetylornithine deacetylase-like protein	N/A
2	LmjF.34.3390	0.367889	2.48515e-67	2.0321e-63	0.292	0.154	hypothetical protein, conserved	N/A
2	LmjF.20.1540	0.367844	1.23463e-71	1.00956e-67	0.173	0.072	hypothetical protein, unknown function	N/A
2	LmjF.12.0400	0.367482	4.18136e-72	3.4191e-68	0.108	0.035	3'-nucleotidase/nuclease, putative	endonuclease activity;hydrolase activity, acting on ester bonds;nucleic acid binding
2	LmjF.28.0830	0.367437	8.7218e-70	7.13182e-66	0.285	0.147	hypothetical protein, conserved	N/A
2	LmjF.13.0440	0.366986	5.79035e-61	4.73477e-57	0.372	0.218	mitogen-activated protein kinase kinase 2	ATP binding;protein binding;protein kinase activity
2	LmjF.29.2220	0.366836	5.69337e-74	4.65547e-70	0.355	0.192	hypothetical protein, unknown function	N/A
2	LmjF.36.6550	0.366694	3.59549e-64	2.94003e-60	0.217	0.105	protein-l-isoaspartate o-methyltransferase, putative	protein-L-isoaspartate (D-aspartate) O-methyltransferase activity
2	LmjF.34.3650	0.36595	4.41409e-41	3.6094e-37	0.431	0.289	60S ribosomal protein L21, putative	structural constituent of ribosome
2	LmjF.12.0040	0.365521	4.46742e-66	3.65301e-62	0.143	0.057	Mitochondrial SSU ribosomal protein 29, putative	N/A
2	LmjF.35.2680	0.365397	1.20551e-69	9.85744e-66	0.22	0.103	heat shock factor binding protein 1, putative	transcription corepressor activity
2	LmjF.35.3770	0.364748	7.25409e-59	5.93167e-55	0.167	0.075	Enriched in surface-labeled proteome protein 9, putative	N/A
2	LmjF.29.1280	0.364189	9.62346e-60	7.86911e-56	0.175	0.081	lipase domain protein, putative	N/A
2	LmjF.36.5360	0.36384	3.04166e-69	2.48716e-65	0.164	0.068	ubiquinone biosynthesis methyltransferase, putative	methyltransferase activity
2	LmjF.25.0310	0.363712	4.47043e-67	3.65547e-63	0.14	0.055	hypothetical protein, conserved	N/A
2	LmjF.34.0990	0.363098	1.82513e-67	1.49241e-63	0.269	0.138	p-glycoprotein	ATP binding;ATPase activity;ATPase-coupled transmembrane transporter activity
2	LmjF.36.4950	0.362415	2.3232e-60	1.89968e-56	0.146	0.062	2OG-Fe(II) oxygenase superfamily, putative	N/A
2	LmjF.35.3330	0.362308	3.96309e-65	3.24062e-61	0.202	0.095	mitochondrial carrier protein, putative	N/A
2	LmjF.24.1820	0.362052	1.89995e-74	1.55359e-70	0.123	0.042	short chain dehydrogenase/reductase, putative	N/A
2	LmjF.30.3140	0.361115	5.47758e-74	4.47902e-70	0.413	0.234	hypothetical protein, conserved	N/A
2	LmjF.25.0790	0.360923	6.36255e-65	5.20266e-61	0.207	0.098	hypothetical protein, unknown function	N/A
2	LmjF.16.0230	0.360465	2.69765e-67	2.20587e-63	0.432	0.255	Protein tyrosine phosphatase PRL-1	phosphatase activity
2	LmjF.20.1280	0.360289	2.92523e-158	2.39196e-154	0.991	0.968	small myristoylated protein 4, putative	N/A
2	LmjF.36.4540	0.360222	3.67849e-77	3.00791e-73	0.206	0.09	elongation factor-2 kinase-like protein	ATP binding;protein serine/threonine kinase activity
2	LmjF.33.1750	0.359237	1.50663e-61	1.23197e-57	0.126	0.049	macrophage migration inhibitory factor-like protein	N/A
2	LmjF.24.0290	0.359233	2.75014e-62	2.24879e-58	0.235	0.118	NLI interacting factor-like phosphatase, putative	N/A
2	LmjF.36.3810	0.359005	1.17371e-61	9.59744e-58	0.211	0.103	aminomethyltransferase, mitochondrial, putative	aminomethyltransferase activity;protein binding
2	LmjF.22.0770	0.357939	1.13462e-73	9.27778e-70	0.372	0.204	NADH-cytochrome b5 reductase, putative	oxidoreductase activity
2	LmjF.27.0770	0.357804	3.30942e-66	2.70612e-62	0.127	0.047	Flagella connector protein 1	N/A
2	LmjF.10.0090	0.357387	1.53824e-54	1.25782e-50	0.167	0.078	dehydrogenase-like protein	N/A
2	LmjF.35.4450	0.357335	1.55303e-67	1.26991e-63	0.272	0.139	predicted zinc finger protein	metal ion binding
2	LmjF.21.0630	0.35676	1.73728e-76	1.42057e-72	0.122	0.041	DNA polymerase eta, putative	damaged DNA binding
2	LmjF.13.1250	0.35612	7.15506e-67	5.85069e-63	0.126	0.047	hypothetical protein, unknown function	N/A
2	LmjF.32.2750	0.355486	3.41994e-65	2.79649e-61	0.239	0.119	Guanine nucleotide exchange factor in Golgi transport N-terminal/Sec7 domain containing protein, putative	N/A
2	LmjF.35.3170	0.355072	9.86214e-63	8.06427e-59	0.155	0.066	STE/STE11 serine/threonine-protein kinase, putative	ATP binding;protein kinase activity
2	LmjF.36.2580	0.354617	6.02368e-74	4.92556e-70	0.108	0.035	related to multifunctional cyclin-dependent kinase pho85-like protein	glycerophosphocholine phosphodiesterase activity;phosphoric diester hydrolase activity
2	LmjF.34.0190	0.354383	9.33504e-54	7.63326e-50	0.245	0.132	Domain of unknown function (DUF1935), putative	N/A
2	LmjF.30.3110	0.354371	1.02187e-66	8.35585e-63	0.162	0.068	S-adenosylmethionine decarboxylase	adenosylmethionine decarboxylase activity
2	LmjF.02.0340	0.353542	6.47368e-64	5.29353e-60	0.209	0.099	UAA transporter family, putative	N/A
2	LmjF.16.1385	0.351891	1.08493e-67	8.87145e-64	0.364	0.204	hypothetical protein, conserved	N/A
2	LmjF.31.2070	0.351667	4.14073e-69	3.38588e-65	0.189	0.083	CRAL/TRIO domain containing protein, putative	N/A
2	LmjF.08.1110	0.351372	3.13981e-68	2.56742e-64	0.306	0.162	stress-induced protein sti1	protein binding
2	LmjF.35.4020	0.351367	1.07634e-64	8.80126e-61	0.318	0.174	Bem46-like serine peptidase	N/A
2	LmjF.21.0030	0.351248	5.06783e-63	4.14396e-59	0.133	0.053	hypothetical protein, conserved	N/A
2	LmjF.30.2870	0.350478	8.37685e-65	6.84975e-61	0.148	0.061	hypothetical protein, conserved	N/A
2	LmjF.35.2260	0.350349	2.11914e-72	1.73282e-68	0.136	0.05	ATP-grasp domain containing protein, putative	ATP binding;metal ion binding
2	LmjF.17.0340	0.350066	1.58895e-64	1.29929e-60	0.139	0.055	hypothetical protein, conserved	N/A
2	LmjF.10.0380	0.348932	1.04892e-109	8.57705e-106	0.96	0.919	folate/biopterin transporter, putative	N/A
2	LmjF.22.0160	0.348664	2.12327e-62	1.7362e-58	0.352	0.202	hypothetical protein, conserved	metal ion binding
2	LmjF.29.0440	0.348654	4.56492e-67	3.73274e-63	0.224	0.107	kinetoplastid-specific phospho-protein phosphatase, putative	hydrolase activity
2	LmjF.30.1170	0.348336	4.21065e-78	3.44305e-74	0.108	0.033	DHHC palmitoyltransferase, putative	palmitoyltransferase activity
2	LmjF.04.0510	0.347566	9.02443e-71	7.37927e-67	0.163	0.066	hypothetical protein	N/A
2	LmjF.28.1940	0.346733	6.7233e-68	5.49764e-64	0.359	0.2	divalent cation transporter, putative	metal ion transmembrane transporter activity
2	LmjF.34.3640	0.346408	1.06217e-76	8.68534e-73	0.109	0.034	hypothetical protein, conserved	N/A
2	LmjF.19.0360	0.346159	6.41497e-63	5.24552e-59	0.259	0.134	CMGC/DYRK protein kinase, putative	ATP binding;protein kinase activity
2	LmjF.14.0230	0.345533	2.46032e-54	2.0118e-50	0.153	0.069	hypothetical protein, conserved	N/A
2	LmjF.08.0520	0.345333	1.03559e-57	8.468e-54	0.154	0.068	hypothetical protein, conserved	protein binding
2	LmjF.32.1020	0.343966	2.07516e-61	1.69686e-57	0.158	0.069	STE group serine/threonine-protein kinase, putative	ATP binding;protein kinase activity
2	LmjF.36.2080	0.343116	5.85349e-63	4.7864e-59	0.272	0.144	streptococcal hemagglutinin-like protein	N/A
2	LmjF.26.2080	0.342584	3.52495e-64	2.88235e-60	0.26	0.133	hypothetical protein, conserved	N/A
2	LmjF.28.2410	0.34242	2.10578e-60	1.72189e-56	0.171	0.077	dolichyl-lipid chaperone, putative	N/A
2	LmjF.09.0030	0.34172	4.86069e-76	3.97459e-72	0.106	0.033	Peroxisomal biogenesis factor 11 (PEX11), putative	N/A
2	LmjF.14.1360	0.341564	8.48133e-50	6.93519e-46	0.691	0.52	inositol-3-phosphate synthase	inositol-3-phosphate synthase activity
2	LmjF.36.0610	0.340914	3.78497e-64	3.09497e-60	0.264	0.136	DNAJ protein-like protein	N/A
2	LmjF.15.1345	0.340817	5.26242e-58	4.30308e-54	0.149	0.064	hypothetical protein, conserved	N/A
2	LmjF.33.0270	0.340672	1.36651e-67	1.1174e-63	0.232	0.112	Mpv17 / PMP22 family, putative	N/A
2	LmjF.17.0690	0.33979	1.37338e-56	1.12302e-52	0.181	0.086	hypothetical protein, conserved	N/A
2	LmjF.16.1030	0.339783	7.84627e-59	6.41589e-55	0.238	0.123	Protein of unknown function (DUF3184), putative	transferase activity, transferring phosphorus-containing groups
2	LmjF.16.1480	0.339564	1.2873e-63	1.05262e-59	0.217	0.105	hypothetical protein, conserved	N/A
2	LmjF.33.2940	0.339556	1.4074e-71	1.15083e-67	0.229	0.107	hypothetical protein, conserved	N/A
2	LmjF.28.2930	0.339111	5.27638e-64	4.3145e-60	0.122	0.045	Low-affinity phosphate transporter PHO91	transmembrane transporter activity
2	LmjF.18.0300	0.338914	2.7321e-57	2.23404e-53	0.205	0.101	hypothetical protein, conserved	N/A
2	LmjF.05.1000	0.33857	7.41182e-54	6.06065e-50	0.33	0.194	hypothetical protein, conserved	N/A
2	LmjF.34.2800	0.338454	1.01661e-46	8.31284e-43	0.661	0.494	tuzin, putative	N/A
2	LmjF.29.2510	0.338243	3.30105e-53	2.69927e-49	0.669	0.491	ATP-dependent 6-phosphofructokinase, glycosomal	6-phosphofructokinase activity;ATP binding
2	LmjF.25.1443	0.337113	2.125e-55	1.73761e-51	0.589	0.404	U1 small nuclear ribonucleoprotein 24 kDa	N/A
2	LmjF.15.0300	0.336956	7.35536e-59	6.01448e-55	0.195	0.093	Ecotin-like protein	serine-type endopeptidase inhibitor activity
2	LmjF.29.0960	0.336563	1.97871e-64	1.61799e-60	0.38	0.219	hypothetical protein, unknown function	N/A
2	LmjF.31.1310	0.336261	1.56151e-63	1.27685e-59	0.283	0.15	hypothetical protein, conserved	N/A
2	LmjF.06.0060	0.335949	6.29946e-61	5.15107e-57	0.291	0.158	hypothetical protein, conserved	N/A
2	LmjF.05.0580	0.33568	7.98128e-62	6.5263e-58	0.317	0.176	hypothetical protein, conserved	N/A
2	LmjF.19.1540	0.33527	6.08165e-57	4.97296e-53	0.224	0.115	choline/Carnitine o-acyltransferase-like protein	transferase activity, transferring acyl groups
2	LmjF.27.2290	0.334636	5.08782e-65	4.16031e-61	0.238	0.118	acyl-CoA oxidase, putative	acyl-CoA oxidase activity;oxidoreductase activity, acting on the CH-CH group of donors
2	LmjF.34.3260	0.33402	1.17803e-58	9.63272e-55	0.135	0.056	DNA repair metallo-beta-lactamase, putative	N/A
2	LmjF.03.0560	0.333746	5.20668e-58	4.2575e-54	0.239	0.123	hypothetical protein	N/A
2	LmjF.31.3020	0.332067	2.2433e-56	1.83434e-52	0.137	0.058	hypothetical protein, unknown function	N/A
2	LmjF.17.0370	0.33144	5.64347e-58	4.61466e-54	0.119	0.046	hypothetical protein, unknown function	N/A
2	LmjF.20.0580	0.331151	6.42682e-65	5.25521e-61	0.117	0.042	MORN repeat, putative	N/A
2	LmjF.35.1620	0.331035	7.21143e-63	5.89679e-59	0.299	0.162	Concanavalin A-like lectin/glucanases superfamily, putative	N/A
2	LmjF.09.1170	0.330371	4.49807e-54	3.67808e-50	0.21	0.107	hypothetical protein, conserved	N/A
2	LmjF.32.1530	0.328479	4.38834e-63	3.58835e-59	0.145	0.059	NUDIX hydrolase dihydroneopterin triphosphate pyrophosphohydrolase/hydrolase, putative	hydrolase activity
2	LmjF.31.1130	0.327779	7.93653e-50	6.4897e-46	0.605	0.429	amidohydrolase, putative	hydrolase activity
2	LmjF.02.0570	0.327659	6.08003e-69	4.97164e-65	0.24	0.116	protein kinase, putative	ATP binding;protein kinase activity
2	LmjF.29.0935	0.327266	2.31715e-61	1.89473e-57	0.15	0.064	A-1 protein, putative	N/A
2	LmjF.34.0800	0.327245	5.85948e-63	4.7913e-59	0.164	0.071	serine/threonine-protein phosphatase PP1, putative	hydrolase activity
2	LmjF.04.1210	0.326089	1.09673e-53	8.96792e-50	0.151	0.068	casein kinase I, putative	ATP binding;protein kinase activity
2	LmjF.35.3340	0.325447	1.88872e-52	1.54441e-48	0.72	0.545	6-phosphogluconate dehydrogenase, decarboxylating, putative	NADP binding;oxidoreductase activity;phosphogluconate dehydrogenase (decarboxylating) activity
2	LmjF.36.4210	0.325235	6.46984e-54	5.29039e-50	0.131	0.056	WD domain, G-beta repeat/Utp21 specific WD40 associated putative domain containing protein, putative	catalytic activity;protein binding
2	LmjF.31.0880	0.324992	4.65323e-49	3.80495e-45	0.828	0.701	amino acid permease 3	N/A
2	LmjF.32.0850	0.324188	7.18818e-60	5.87778e-56	0.15	0.064	polypyrimidine tract-binding protein, putative	nucleic acid binding
2	LmjF.24.1090	0.324108	2.79544e-65	2.28583e-61	0.106	0.036	hypothetical predicted multipass transmembrane protein	N/A
2	LmjF.20.1020	0.324061	4.00381e-57	3.27392e-53	0.173	0.08	hypothetical protein, unknown function	N/A
2	LmjF.29.1570	0.323566	1.04957e-58	8.5823e-55	0.235	0.12	glutamamyl carboxypeptidase, putative	deacetylase activity;hydrolase activity
2	LmjF.34.1220	0.323538	3.80385e-57	3.11041e-53	0.22	0.111	inositol 5-phosphatase-like protein	N/A
2	LmjF.31.1200	0.32351	7.28444e-56	5.95648e-52	0.393	0.237	cytochrome b5-like Heme/Steroid binding domain containing protein, putative	N/A
2	LmjF.18.0530	0.323098	2.7746e-57	2.26879e-53	0.145	0.062	tubulin cofactor C domain-containing protein RP2, putative (pseudogene)	N/A
2	LmjF.26.0830	0.322371	1.44356e-55	1.1804e-51	0.199	0.099	aspartate--ammonia ligase, putative	aspartate-ammonia ligase activity
2	LmjF.35.1140	0.322077	3.93594e-57	3.21842e-53	0.212	0.106	oligosaccharyl transferase-like protein	oligosaccharyl transferase activity
2	LmjF.31.0920	0.321755	5.12465e-48	4.19043e-44	0.208	0.11	sodium stibogluconate resistance protein, putative	N/A
2	LmjF.34.0780	0.321429	1.27189e-66	1.04003e-62	0.196	0.089	serine/threonine-protein phosphatase PP1, putative	hydrolase activity
2	LmjF.27.1180	0.320744	1.01922e-56	8.33418e-53	0.102	0.037	protein phosphatase 2C, putative	phosphatase activity
2	LmjF.32.0460	0.319918	5.69981e-61	4.66074e-57	0.185	0.086	prostaglandin f synthase, putative	oxidoreductase activity
2	LmjF.28.0990	0.31923	7.60589e-55	6.21933e-51	0.245	0.131	Serine incorporator (Serinc), putative	N/A
2	LmjF.33.2835	0.319129	5.50521e-57	4.50161e-53	0.389	0.233	hypothetical protein	N/A
2	LmjF.11.0950	0.318333	2.37156e-63	1.93923e-59	0.119	0.044	hypothetical protein, conserved	N/A
2	LmjF.21.0880	0.317212	2.22321e-51	1.81792e-47	0.146	0.066	ABC transporter, putative	ATP binding
2	LmjF.32.2470	0.317201	1.44182e-57	1.17898e-53	0.16	0.072	hypothetical protein, unknown function	N/A
2	LmjF.33.1420	0.316976	1.92582e-54	1.57474e-50	0.268	0.147	amino acid permease-like protein	N/A
2	LmjF.15.0210	0.316366	1.05541e-58	8.63005e-55	0.172	0.078	hypothetical protein, conserved	N/A
2	LmjF.17.0880	0.316355	1.33574e-57	1.09223e-53	0.317	0.179	hypothetical protein, conserved	N/A
2	LmjF.36.2420	0.316319	2.62713e-57	2.1482e-53	0.231	0.119	serine peptidase, Clan SC, Family S9B	serine-type peptidase activity
2	LmjF.31.2090	0.316317	1.9494e-49	1.59402e-45	0.188	0.095	hypothetical protein, unknown function	N/A
2	LmjF.05.0980	0.315208	8.21098e-62	6.71412e-58	0.232	0.115	NADH-ubiquinone oxidoreductase, mitochondrial, putative	4 iron, 4 sulfur cluster binding;FMN binding;NAD binding;NADH dehydrogenase (ubiquinone) activity;oxidoreductase activity, acting on NAD(P)H
2	LmjF.35.4810	0.315119	2.02117e-64	1.65271e-60	0.122	0.045	BRCA1 C Terminus (BRCT) domain containing protein, putative	N/A
2	LmjF.29.0460	0.314974	3.07582e-60	2.5151e-56	0.161	0.071	hypothetical protein, conserved	N/A
2	LmjF.31.1500	0.314785	2.6523e-59	2.16878e-55	0.251	0.13	hypothetical protein, conserved	N/A
2	LmjF.16.0480	0.314572	5.27654e-57	4.31463e-53	0.179	0.084	Bifunctional arabino/fucokinase pyrophosphorylase	ATP binding;kinase activity;transferase activity, transferring phosphorus-containing groups
2	LmjF.36.3830	0.313413	3.3056e-57	2.70299e-53	0.219	0.11	Zinc finger, C3HC4 type (RING finger), putative	N/A
2	LmjF.29.0250	0.311776	6.38746e-55	5.22302e-51	0.428	0.264	thymine-7-hydroxylase, putative	oxidoreductase activity
2	LmjF.09.1010	0.311385	2.90917e-52	2.37883e-48	0.395	0.243	Present in the outer mitochondrial membrane proteome 10	N/A
2	LmjF.34.1270	0.311109	1.43586e-57	1.17411e-53	0.115	0.044	Protein of unknown function (DUF3595), putative	mechanosensitive ion channel activity
2	LmjF.29.1360	0.310682	1.68764e-51	1.37999e-47	0.17	0.082	RNA binding protein, putative	nucleic acid binding
2	LmjF.07.0100	0.310554	2.77151e-54	2.26626e-50	0.182	0.088	metallo-peptidase, Clan ME, Family M16C	metal ion binding
2	LmjF.31.1920	0.310468	3.40962e-61	2.78805e-57	0.347	0.196	RING-variant domain containing protein, putative	zinc ion binding
2	LmjF.34.3120	0.309643	1.45757e-49	1.19186e-45	0.27	0.152	lipophosphoglycan biosynthetic protein (lpg2)	GDP-mannose transmembrane transporter activity
2	LmjF.35.1740	0.309417	7.74066e-56	6.32953e-52	0.116	0.045	ubiquitin hydrolase, putative	thiol-dependent ubiquitin-specific protease activity
2	LmjF.34.0970	0.309159	1.7866e-52	1.46091e-48	0.812	0.676	amastin-like protein	N/A
2	LmjF.36.6960	0.308164	4.47824e-49	3.66186e-45	0.177	0.088	elks delta-like protein	N/A
2	LmjF.29.1420	0.306035	1.68198e-50	1.37535e-46	0.144	0.065	major facilitator superfamily, putative	transmembrane transporter activity
2	LmjF.35.1010	0.305797	1.70732e-50	1.39608e-46	0.757	0.593	casein kinase, putative	ATP binding;protein kinase activity
2	LmjF.18.1330	0.305679	2.06218e-55	1.68624e-51	0.267	0.145	cholinephosphate cytidylyltransferase A, putative	catalytic activity;phosphotransferase activity, for other substituted phosphate groups
2	LmjF.34.2630	0.305395	2.63268e-57	2.15274e-53	0.169	0.077	phospholipid-transporting ATPase-like protein	ATP binding;ATPase-coupled intramembrane lipid transporter activity;magnesium ion binding;nucleotide binding
2	LmjF.03.0270	0.305302	1.77245e-56	1.44933e-52	0.136	0.057	FYVE zinc finger/Apolipoprotein A1/A4/E domain containing protein, putative	lipid binding;metal ion binding
2	LmjF.28.2660	0.304645	3.30315e-52	2.70099e-48	0.262	0.145	SelR domain containing protein, putative	oxidoreductase activity, acting on a sulfur group of donors, disulfide as acceptor;peptide-methionine (R)-S-oxide reductase activity
2	LmjF.35.4720	0.304248	8.18658e-51	6.69416e-47	0.49	0.319	lipoic acid containing carrier protein, putative	N/A
2	LmjF.35.1050	0.303923	2.95501e-52	2.41631e-48	0.286	0.161	calcium/calmodulin-dependent protein kinase, putative	ATP binding;protein kinase activity
2	LmjF.14.0700	0.303816	1.66679e-53	1.36294e-49	0.148	0.066	fatty acid elongase, putative	N/A
2	LmjF.36.0940	0.303023	6.3752e-46	5.213e-42	0.198	0.105	40S ribosomal protein S18, putative	RNA binding;nucleic acid binding;structural constituent of ribosome
2	LmjF.21.1030	0.302898	3.04977e-51	2.49379e-47	0.184	0.091	hypothetical protein, conserved	N/A
2	LmjF.31.1445	0.301961	4.15365e-50	3.39644e-46	0.33	0.196	hypothetical protein, unknown function	N/A
2	LmjF.19.0170	0.301584	1.01515e-52	8.30085e-49	0.334	0.196	hypothetical protein, conserved	N/A
2	LmjF.24.2060	0.300696	1.74395e-58	1.42603e-54	0.228	0.115	transketolase	catalytic activity;transketolase activity
2	LmjF.06.0030	0.300249	1.93963e-46	1.58603e-42	0.676	0.497	WD domain, G-beta repeat, putative	protein binding
2	LmjF.36.0780	0.300224	3.14547e-52	2.57205e-48	0.221	0.116	Calpain family cysteine protease, putative	calcium-dependent cysteine-type endopeptidase activity
2	LmjF.16.0370	0.30004	1.33026e-50	1.08775e-46	0.153	0.071	hypothetical protein, conserved	N/A
2	LmjF.16.1440	0.299831	5.49765e-47	4.49543e-43	0.264	0.15	hypothetical protein, conserved	N/A
2	LmjF.36.5520	0.299377	5.62308e-51	4.59799e-47	0.151	0.07	adiponectin receptor protein 1, putative	N/A
2	LmjF.09.1380	0.298714	2.58037e-57	2.10997e-53	0.133	0.055	hypothetical protein, conserved	N/A
2	LmjF.07.1000	0.298501	3.76178e-53	3.07601e-49	0.181	0.088	RNA binding protein-like protein	N/A
2	LmjF.28.2250	0.298299	7.22034e-58	5.90407e-54	0.197	0.095	glycosomal membrane protein-like protein	N/A
2	LmjF.09.0710	0.298001	1.50825e-57	1.2333e-53	0.131	0.053	hypothetical protein, conserved	N/A
2	LmjF.34.0140	0.297859	9.46631e-47	7.7406e-43	0.534	0.362	malate dehydrogenase	L-malate dehydrogenase activity;catalytic activity;malate dehydrogenase activity;oxidoreductase activity;oxidoreductase activity, acting on the CH-OH group of donors, NAD or NADP as acceptor
2	LmjF.29.2130	0.297785	2.54531e-48	2.0813e-44	0.159	0.076	hypothetical protein, conserved	N/A
2	LmjF.25.0210	0.297236	9.78963e-54	8.00498e-50	0.206	0.104	mitochondrial carrier protein, putative	N/A
2	LmjF.32.2250	0.295518	7.75306e-51	6.33968e-47	0.192	0.097	hypothetical protein, unknown function	N/A
2	LmjF.33.0230	0.295097	4.97096e-49	4.06475e-45	0.193	0.099	palmitoyl acyltransferase 2, putative	palmitoyltransferase activity
2	LmjF.23.0970	0.294811	6.12933e-43	5.01195e-39	0.187	0.1	hypothetical protein, conserved	N/A
2	LmjF.35.0710	0.294539	1.22247e-50	9.99617e-47	0.361	0.218	Endonuclease/Exonuclease/phosphatase family, putative	N/A
2	LmjF.36.5250	0.294423	1.24701e-50	1.01968e-46	0.134	0.059	conserved protein	N/A
2	LmjF.13.0470	0.294391	1.25005e-50	1.02217e-46	0.133	0.058	hypothetical protein, conserved	N/A
2	LmjF.19.1560	0.294379	2.37275e-49	1.9402e-45	0.171	0.083	inosine-5'-monophosphate dehydrogenase	IMP dehydrogenase activity;catalytic activity;oxidoreductase activity
2	LmjF.08.1090	0.294188	1.94383e-47	1.58947e-43	0.146	0.068	histone deacetylase, putative	N/A
2	LmjF.12.0380	0.294057	6.83891e-54	5.59218e-50	0.382	0.231	pumillio protein 4, putative	RNA binding
2	LmjF.10.0570	0.293074	1.889e-40	1.54463e-36	0.126	0.059	zinc-binding dehydrogenase-like protein	oxidoreductase activity
2	LmjF.35.1040	0.292794	2.78778e-48	2.27957e-44	0.481	0.315	zinc finger CCCH domain containing protein 11	metal ion binding
2	LmjF.16.0860	0.292619	1.24605e-46	1.0189e-42	0.244	0.137	hypothetical protein, conserved	N/A
2	LmjF.22.0410	0.29201	1.16764e-49	9.54782e-46	0.406	0.256	hypothetical protein, conserved	N/A
2	LmjF.34.0080	0.291962	7.06777e-51	5.77932e-47	0.337	0.201	glucose-6-phosphate 1-dehydrogenase, putative	NADP binding;glucose-6-phosphate dehydrogenase activity;oxidoreductase activity, acting on CH-OH group of donors
2	LmjF.02.0350	0.291809	2.33477e-46	1.90914e-42	0.121	0.053	hypothetical protein, conserved	N/A
2	LmjF.23.1165	0.29176	1.13966e-44	9.31904e-41	0.187	0.098	coronin, putative	protein binding
2	LmjF.33.2740	0.291521	7.69413e-55	6.29149e-51	0.384	0.231	translation initiation factor IF-2, putative	GTP binding;GTPase activity
2	LmjF.29.0650	0.291437	7.35234e-46	6.01201e-42	0.168	0.084	phosphate transporter, putative	inorganic phosphate transmembrane transporter activity
2	LmjF.31.2380	0.291303	9.76753e-37	7.98691e-33	0.439	0.296	hypothetical protein, unknown function	N/A
2	LmjF.13.1410	0.291273	3.02902e-48	2.47683e-44	0.137	0.062	hypothetical protein, unknown function	N/A
2	LmjF.34.0960	0.291254	4.31738e-45	3.53032e-41	0.427	0.277	amastin-like surface protein, putative	N/A
2	LmjF.14.1010	0.291131	1.17613e-54	9.61721e-51	0.141	0.061	hypothetical protein, conserved	N/A
2	LmjF.22.0790	0.291098	4.76829e-48	3.89903e-44	0.173	0.085	translation initiation factor SUI1, putative	RNA binding;translation initiation factor activity
2	LmjF.20.0650	0.291023	3.97627e-44	3.2514e-40	0.178	0.092	rRNA biogenesis protein-like protein	protein binding
2	LmjF.31.3140	0.290836	3.6496e-54	2.98428e-50	0.143	0.063	hypothetical protein, conserved	N/A
2	LmjF.31.0810	0.290724	6.36505e-51	5.2047e-47	0.148	0.067	hypothetical protein, conserved	N/A
2	LmjF.09.0270	0.290497	7.88207e-54	6.44517e-50	0.189	0.092	integral membrane transport protein, putative	transmembrane transporter activity
2	LmjF.07.0620	0.290241	1.1039e-49	9.02662e-46	0.271	0.153	hypothetical protein, conserved	N/A
2	LmjF.25.0850	0.289876	5.28178e-47	4.31891e-43	0.141	0.065	hypothetical protein, conserved	N/A
2	LmjF.02.0640	0.289657	2.0896e-44	1.70866e-40	0.15	0.073	hypothetical protein, unknown function	N/A
2	LmjF.26.0300	0.289327	4.74901e-41	3.88326e-37	0.206	0.113	aminopeptidase-like protein	metallopeptidase activity;zinc ion binding
2	LmjF.36.1955	0.289214	2.50187e-46	2.04578e-42	0.156	0.076	TLD, putative	N/A
2	LmjF.20.1230	0.28912	1.89065e-51	1.54599e-47	0.231	0.122	Domain of unknown function (DUF1935), putative	N/A
2	LmjF.25.2340	0.28905	4.25157e-47	3.47651e-43	0.437	0.282	AGC essential kinase 1	ATP binding;protein kinase activity
2	LmjF.22.1600	0.288945	2.99938e-56	2.45259e-52	0.333	0.191	ser/thr protein phosphatase, putative	hydrolase activity
2	LmjF.19.1510	0.287701	2.89625e-53	2.36826e-49	0.297	0.168	Triose-phosphate Transporter family, putative	N/A
2	LmjF.36.1340	0.287634	1.04498e-60	8.54476e-57	0.207	0.099	N-acetyltransferase subunit Nat1, putative	protein binding
2	LmjF.22.0210	0.287222	1.26015e-46	1.03043e-42	0.193	0.1	Nucleolar protein 168, putative	N/A
2	LmjF.24.1280	0.286234	3.04686e-64	2.49142e-60	0.945	0.876	amastin-like surface protein-like protein	N/A
2	LmjF.31.0690	0.286149	5.37047e-49	4.39143e-45	0.116	0.049	hypothetical protein, conserved	N/A
2	LmjF.07.0810	0.285613	7.29136e-50	5.96214e-46	0.155	0.072	cytochrome b5-like protein	N/A
2	LmjF.09.0580	0.285612	3.35883e-50	2.74652e-46	0.109	0.043	surface antigen-like protein	N/A
2	LmjF.34.0950	0.2856	2.28137e-53	1.86548e-49	0.305	0.173	selenoprotein, putative	N/A
2	LmjF.32.0540	0.283877	1.21143e-39	9.90582e-36	0.128	0.061	sulfite exporter TauE/SafE, putative	N/A
2	LmjF.35.3360	0.283554	2.21203e-49	1.80878e-45	0.135	0.06	Putative death-receptor fusion protein (DUF2428), putative	N/A
2	LmjF.17.1320	0.28351	9.09671e-57	7.43838e-53	0.278	0.15	hypothetical protein, conserved	protein binding
2	LmjF.36.2540	0.283033	1.18604e-52	9.69821e-49	0.231	0.121	C-4 sterol methyl oxidase, putative	iron ion binding;oxidoreductase activity
2	LmjF.28.2860	0.282341	1.65791e-47	1.35568e-43	0.409	0.258	cytosolic malate dehydrogenase	catalytic activity;malate dehydrogenase activity;oxidoreductase activity;oxidoreductase activity, acting on the CH-OH group of donors, NAD or NADP as acceptor
2	LmjF.31.1010	0.282215	9.18676e-51	7.51202e-47	0.276	0.155	hypothetical protein, conserved	N/A
2	LmjF.33.0740	0.281516	4.9672e-51	4.06168e-47	0.207	0.106	hypothetical protein, conserved	N/A
2	LmjF.29.2110	0.280637	5.89771e-48	4.82256e-44	0.22	0.117	UDP-glucose:glycoprotein glucosyltransferase, putative	UDP-glucose:glycoprotein glucosyltransferase activity
2	LmjF.13.0730	0.280285	8.14772e-43	6.66239e-39	0.266	0.156	ubiquitin-like protein	protein binding
2	LmjF.21.1680	0.279747	2.78953e-48	2.281e-44	0.21	0.11	pumillio protein 3, putative	RNA binding
2	LmjF.15.0180	0.27973	3.2555e-52	2.66202e-48	0.212	0.109	CMGC/DYRK protein kinase, putative	ATP binding;protein kinase activity
2	LmjF.20.0590	0.279677	9.48916e-49	7.75929e-45	0.108	0.044	hypothetical protein, conserved	N/A
2	LmjF.35.0020	0.27948	1.18859e-49	9.71907e-46	0.195	0.099	pyruvate kinase	N/A
2	LmjF.26.1300	0.279166	3.33515e-44	2.72716e-40	0.245	0.139	Nucleolar protein 105, putative	protein binding
2	LmjF.21.0960	0.278829	2.5128e-41	2.05472e-37	0.14	0.068	hypothetical protein, conserved	N/A
2	LmjF.36.3860	0.27854	6.97419e-52	5.70279e-48	0.119	0.049	similar to leishmania major. l411.4-like protein	N/A
2	LmjF.35.1240	0.278488	9.99281e-48	8.17112e-44	0.136	0.061	hypothetical protein, conserved	N/A
2	LmjF.12.0070	0.278486	1.04453e-47	8.54116e-44	0.161	0.078	hypothetical protein, conserved	N/A
2	LmjF.30.2200	0.27832	4.50231e-40	3.68154e-36	0.474	0.325	Zinc finger C-x8-C-x5-C-x3-H type (and similar), putative	metal ion binding
2	LmjF.36.6330	0.277909	7.72837e-54	6.31949e-50	0.31	0.176	hypothetical protein, conserved	N/A
2	LmjF.34.2360	0.277833	8.78565e-50	7.18403e-46	0.249	0.136	hypothetical protein, conserved	N/A
2	LmjF.28.2940	0.2774	3.7164e-51	3.0389e-47	0.12	0.05	hypothetical protein, unknown function	N/A
2	LmjF.23.0200	0.276589	1.18419e-44	9.68312e-41	0.296	0.176	endoribonuclease L-PSP (pb5), putative	N/A
2	LmjF.17.0590	0.276469	1.09733e-49	8.97285e-46	0.176	0.086	hypothetical protein, conserved	N/A
2	LmjF.32.1260	0.276464	8.90931e-44	7.28514e-40	0.107	0.045	CRAL/TRIO domain containing protein, putative	N/A
2	LmjF.21.0930	0.276397	3.17167e-45	2.59347e-41	0.248	0.14	histone H2A, putative	DNA binding;protein heterodimerization activity
2	LmjF.10.0040	0.27621	1.11951e-45	9.15421e-42	0.187	0.097	Gryzun, putative trafficking through Golgi, putative	N/A
2	LmjF.06.0860	0.275828	7.80019e-50	6.37822e-46	0.325	0.19	dihydrofolate reductase-thymidylate synthase	dihydrofolate reductase activity;thymidylate synthase activity
2	LmjF.25.0740	0.275677	3.91305e-55	3.1997e-51	0.17	0.079	DNA repair protein, putative	ATP binding;DNA binding;zinc ion binding
2	LmjF.36.1870	0.275361	7.01341e-51	5.73486e-47	0.211	0.109	major vault protein, putative	N/A
2	LmjF.14.1110	0.274685	2.54477e-47	2.08086e-43	0.315	0.187	kinesin K39, putative	ATP binding;microtubule binding;microtubule motor activity
2	LmjF.14.1050	0.274653	5.00308e-48	4.09102e-44	0.131	0.058	COQ9, putative	lipid binding
2	LmjF.15.0870	0.274597	1.31478e-45	1.07509e-41	0.125	0.055	Sugar (and other) transporter, putative	transmembrane transporter activity
2	LmjF.34.0790	0.273478	1.80566e-53	1.47649e-49	0.156	0.071	serine/threonine-protein phosphatase PP1, putative	hydrolase activity
2	LmjF.32.3040	0.273429	6.89117e-29	5.63491e-25	0.487	0.344	protein phosphatase 4, putative	hydrolase activity
2	LmjF.08.0030	0.273345	2.82072e-50	2.3065e-46	0.211	0.109	Qc-SNARE protein, putative	N/A
2	LmjF.18.0110	0.272926	2.14977e-36	1.75787e-32	0.135	0.068	Protein of unknown function (DUF726), putative	N/A
2	LmjF.18.1580	0.272884	2.74074e-48	2.2411e-44	0.249	0.138	nonspecific nucleoside hydrolase	hydrolase activity, hydrolyzing N-glycosyl compounds
2	LmjF.03.0030	0.271959	4.31272e-47	3.52651e-43	0.178	0.089	D-3-phosphoglycerate dehydrogenase-like protein	NAD binding;oxidoreductase activity, acting on the CH-OH group of donors, NAD or NADP as acceptor
2	LmjF.24.2280	0.271848	6.01446e-48	4.91802e-44	0.131	0.058	TFIIH basal transcription factor complex helicase subunit, putative	ATP binding;DNA binding;DNA helicase activity;helicase activity;hydrolase activity, acting on acid anhydrides, in phosphorus-containing anhydrides;nucleic acid binding
2	LmjF.34.3630	0.271306	3.25002e-49	2.65754e-45	0.218	0.115	hypothetical protein, conserved	hydrolase activity
2	LmjF.31.3120	0.270851	9.94633e-51	8.13311e-47	0.236	0.127	phosphatidylethanolaminen-methyltransferase-lik e protein	N/A
2	LmjF.27.1420	0.269869	3.52993e-44	2.88643e-40	0.179	0.093	choline kinase	N/A
2	LmjF.10.1230	0.269759	1.56405e-46	1.27892e-42	0.321	0.192	Protein of unknown function (DUF1861), putative	N/A
2	LmjF.31.1460	0.269693	1.50747e-46	1.23266e-42	0.153	0.073	surface membrane protein gp46-like protein	N/A
2	LmjF.13.1530	0.269109	6.66726e-53	5.45182e-49	0.259	0.141	phospholipid-transporting ATPase 1-like protein	ATP binding;ATPase-coupled intramembrane lipid transporter activity;magnesium ion binding;nucleotide binding
2	LmjF.31.0580	0.267299	1.34415e-37	1.09911e-33	0.586	0.422	amino acid transporter aATP11, putative	N/A
2	LmjF.29.1690	0.266998	1.96826e-44	1.60944e-40	0.34	0.209	Acyl-coenzyme A thioesterase, putative	thiolester hydrolase activity
2	LmjF.21.0620	0.266792	1.44047e-39	1.17787e-35	0.123	0.058	DNA polymerase eta, putative	damaged DNA binding
2	LmjF.35.4990	0.265595	3.36994e-47	2.7556e-43	0.536	0.359	sphingomyelin/ceramide phosphorylethanolamine synthase, bifunctional	N/A
2	LmjF.29.1830	0.26556	3.24574e-44	2.65405e-40	0.122	0.055	dihydrolipoamide dehydrogenase, putative	flavin adenine dinucleotide binding;oxidoreductase activity
2	LmjF.30.0340	0.265359	1.33434e-39	1.09109e-35	0.103	0.045	KU80 protein, putative	DNA binding;damaged DNA binding;telomeric DNA binding
2	LmjF.31.1020	0.265195	1.33913e-49	1.09501e-45	0.136	0.06	hypothetical protein, conserved	N/A
2	LmjF.34.0030	0.265169	2.89005e-48	2.36319e-44	0.251	0.139	serine/threonine-protein kinase NAK, putative	ATP binding;protein kinase activity
2	LmjF.19.0260	0.264224	3.33668e-40	2.7284e-36	0.403	0.264	C-terminal motor kinesin, putative	ATP binding;microtubule binding;microtubule motor activity
2	LmjF.31.2461	0.263842	3.28671e-46	2.68754e-42	0.127	0.056	hypothetical protein, conserved	N/A
2	LmjF.26.1260	0.263841	1.15675e-47	9.45876e-44	0.112	0.047	hypothetical protein, unknown function	metal ion binding
2	LmjF.33.1305	0.263219	1.97421e-43	1.61431e-39	0.142	0.068	hypothetical protein, conserved	N/A
2	LmjF.10.1240	0.263193	1.16648e-47	9.53827e-44	0.313	0.184	Protein of unknown function (DUF1861), putative	N/A
2	LmjF.11.1230	0.263179	8.29859e-44	6.78576e-40	0.146	0.07	ABC transporter-like protein	N/A
2	LmjF.32.3590	0.263041	1.11683e-43	9.13229e-40	0.111	0.048	hypothetical protein, conserved	N/A
2	LmjF.23.1490	0.262835	1.75685e-42	1.43657e-38	0.31	0.188	hypothetical protein, unknown function	N/A
2	LmjF.14.0940	0.262835	9.68645e-48	7.92061e-44	0.135	0.061	hypothetical protein, conserved	N/A
2	LmjF.15.1560	0.262577	1.48752e-49	1.21635e-45	0.213	0.111	condensin subunit 1, putative	N/A
2	LmjF.06.0630	0.262214	4.61643e-44	3.77486e-40	0.203	0.109	hypothetical protein, unknown function	N/A
2	LmjF.14.0020	0.261859	1.09148e-51	8.92499e-48	0.111	0.044	phosphatidylinositol 3-kinase 2, putative	N/A
2	LmjF.35.2990	0.261798	9.78198e-46	7.99873e-42	0.345	0.21	3'-5' exonuclease, putative	3'-5' exonuclease activity;nucleic acid binding;zinc ion binding
2	LmjF.16.1000	0.261606	5.89827e-46	4.82302e-42	0.321	0.192	Protein of unknown function (DUF3184), putative	transferase activity, transferring phosphorus-containing groups
2	LmjF.08.0930	0.261552	1.5152e-48	1.23898e-44	0.358	0.216	Serine/threonine-protein kinase NEK6, putative	ATP binding;protein kinase activity
2	LmjF.33.2760	0.261393	2.31628e-54	1.89402e-50	0.109	0.042	hypothetical protein, conserved	N/A
2	LmjF.19.0985	0.260625	2.81987e-42	2.30581e-38	0.401	0.258	4-coumarate:coa ligase-like protein	N/A
2	LmjF.34.2290	0.259947	4.99292e-42	4.08271e-38	0.169	0.087	twinfilin	actin binding
2	LmjF.10.0485	0.259362	1.34549e-40	1.10021e-36	0.127	0.06	hypothetical protein, unknown function	N/A
2	LmjF.10.0510	0.259278	2.70075e-39	2.2084e-35	0.685	0.503	glycerol-3-phosphate dehydrogenase [NAD+], glycosomal	NAD binding;glycerol-3-phosphate dehydrogenase [NAD+] activity;oxidoreductase activity;oxidoreductase activity, acting on the CH-OH group of donors, NAD or NADP as acceptor
2	LmjF.26.1730	0.259131	2.87135e-46	2.34791e-42	0.417	0.262	STE/STE11 serine/threonine-protein kinase, putative	ATP binding;protein kinase activity
2	LmjF.07.0090	0.258837	1.21673e-43	9.94922e-40	0.27	0.157	methionine synthase, putative	cobalamin binding;metal ion binding;methionine synthase activity;zinc ion binding
2	LmjF.18.1540	0.25872	1.67269e-43	1.36776e-39	0.118	0.052	UAA transporter family, putative	N/A
2	LmjF.34.3310	0.258651	9.66286e-46	7.90132e-42	0.181	0.092	hypothetical protein, conserved	N/A
2	LmjF.25.0970	0.25838	1.9945e-43	1.63091e-39	0.228	0.127	hypothetical protein, conserved	calcium ion binding
2	LmjF.34.0700	0.257795	3.58042e-42	2.92771e-38	0.118	0.053	Uncharacterized conserved protein (DUF2039), putative	N/A
2	LmjF.31.0710	0.257766	2.20477e-45	1.80284e-41	0.352	0.217	hypothetical protein, unknown function	N/A
2	LmjF.11.0050	0.257484	9.48572e-47	7.75647e-43	0.148	0.07	SNF2/RAD54 related DNA helicase, putative	ATP binding;endonuclease activity;nucleic acid binding
2	LmjF.29.0860	0.257355	4.10076e-42	3.35319e-38	0.128	0.06	hypothetical protein, unknown function	N/A
2	LmjF.33.2390	0.257278	9.08917e-47	7.43222e-43	0.294	0.171	heat shock protein, putative	ATP binding;unfolded protein binding
2	LmjF.19.0920	0.256761	1.06846e-37	8.73676e-34	0.707	0.545	folate/biopterin transporter, putative	N/A
2	LmjF.29.2390	0.256728	7.25528e-44	5.93264e-40	0.305	0.182	kinesin, putative	ATP binding;microtubule binding;microtubule motor activity
2	LmjF.05.0390	0.256455	2.53617e-38	2.07382e-34	0.148	0.075	STE/STE11 serine/threonine-protein kinase, putative	ATP binding;protein kinase activity
2	LmjF.30.2170	0.25599	3.89883e-36	3.18808e-32	0.116	0.056	E3 ubiquitin-protein ligase, putative	ubiquitin-protein transferase activity
2	LmjF.34.1340	0.255843	4.83243e-43	3.95147e-39	0.1	0.041	hypothetical protein, conserved	N/A
2	LmjF.19.1380	0.255541	5.70261e-48	4.66303e-44	0.256	0.142	cation transporter, putative	cation transmembrane transporter activity
2	LmjF.36.0440	0.255311	1.02195e-48	8.35646e-45	0.21	0.11	hypothetical protein, conserved	N/A
2	LmjF.22.0240	0.254759	5.03206e-40	4.11472e-36	0.464	0.31	hypothetical protein, unknown function	N/A
2	LmjF.13.1640	0.254356	7.97788e-49	6.52351e-45	0.106	0.042	mitogen-activated protein kinase, putative	ATP binding;MAP kinase activity;protein kinase activity
2	LmjF.13.1040	0.254079	3.61705e-41	2.95766e-37	0.101	0.043	subtilisin peptidase	serine-type endopeptidase activity;serine-type peptidase activity
2	LmjF.28.0705	0.254022	1.30198e-44	1.06463e-40	0.114	0.049	Domain of unknown function (DUF4539), putative	N/A
2	LmjF.08.0080	0.253973	2.84397e-44	2.32552e-40	0.211	0.114	ATP-dependent DEAD/H RNA helicase, putative	ATP binding;helicase activity;nucleic acid binding
2	LmjF.08.0590	0.253849	1.04095e-45	8.51183e-42	0.11	0.046	hypothetical protein, unknown function	N/A
2	LmjF.01.0380	0.253635	3.20384e-47	2.61978e-43	0.225	0.121	Dyggve-Melchior-Clausen syndrome protein, putative	N/A
2	LmjF.31.1450	0.253632	1.14781e-42	9.38563e-39	0.119	0.053	surface membrane protein gp46-like protein	N/A
2	LmjF.17.0310	0.252542	7.82495e-38	6.39846e-34	0.123	0.059	hypothetical protein, conserved	N/A
2	LmjF.28.0200	0.251864	4.65105e-42	3.80316e-38	0.21	0.115	hypothetical protein, conserved	catalytic activity
2	LmjF.28.0670	0.251725	6.22417e-41	5.0895e-37	0.108	0.047	hypothetical protein, unknown function	N/A
2	LmjF.36.6150	0.251566	1.00383e-43	8.20835e-40	0.13	0.06	hypothetical protein, conserved	protein binding
2	LmjF.09.0480	0.250881	1.06782e-46	8.73157e-43	0.175	0.087	hypothetical protein, conserved	inward rectifier potassium channel activity
2	LmjF.34.4130	0.250639	7.15445e-47	5.85019e-43	0.126	0.055	Protein of unknown function (DUF1620), putative	N/A
2	LmjF.16.1140	0.250591	2.54616e-31	2.08199e-27	0.142	0.077	WW domain containing protein, putative	protein binding
2	LmjF.29.1860	0.250329	8.69899e-39	7.11316e-35	0.104	0.046	hypothetical protein, conserved	N/A
2	LmjF.30.1430	0.249377	1.57699e-35	1.28951e-31	0.133	0.067	ama1 protein, putative	N/A
2	LmjF.01.0340	0.248906	1.46356e-44	1.19675e-40	0.118	0.052	hypothetical protein, conserved	N/A
2	LmjF.29.1650	0.248882	1.31179e-38	1.07265e-34	0.507	0.35	thioredoxin, putative	N/A
2	LmjF.08.0990	0.248795	4.89454e-44	4.00227e-40	0.123	0.055	DnaJ domain containing protein, putative	N/A
2	LmjF.24.0060	0.248467	1.70698e-44	1.3958e-40	0.115	0.05	hypothetical protein, conserved	N/A
2	LmjF.27.2600	0.248212	9.09634e-38	7.43808e-34	0.146	0.074	hypothetical protein, conserved	single-stranded DNA binding
2	LmjF.31.1370	0.248028	2.56539e-39	2.09772e-35	0.135	0.066	hypothetical protein, conserved	protein binding
2	LmjF.20.1310	0.247637	1.40358e-40	1.1477e-36	0.843	0.705	small myristoylated protein-1	N/A
2	LmjF.03.0500	0.246848	1.62575e-51	1.32938e-47	0.11	0.043	phosphate-Repressible Phosphate Permease-like protein	inorganic phosphate transmembrane transporter activity
2	LmjF.36.0530	0.2465	3.29946e-42	2.69797e-38	0.158	0.079	protein phosphatase 2C-like protein	phosphatase activity;protein serine/threonine phosphatase activity
2	LmjF.12.1330	0.246285	2.19332e-44	1.79347e-40	0.249	0.141	Alpha/beta hydrolase domain-containing protein	N/A
2	LmjF.08.0110	0.24625	1.6093e-41	1.31592e-37	0.185	0.098	hypothetical protein, unknown function	N/A
2	LmjF.21.0670	0.246024	7.2192e-44	5.90314e-40	0.161	0.08	metallo-beta-lactamase family-like protein	N/A
2	LmjF.31.2130	0.244435	4.02771e-39	3.29346e-35	0.311	0.193	hypothetical protein, conserved	ATP binding;RNA ligase (ATP) activity
2	LmjF.36.1820	0.244112	5.94363e-38	4.8601e-34	0.137	0.068	ras-like small GTPases, putative	GTP binding;GTPase activity
2	LmjF.06.0690	0.243682	1.04309e-44	8.52938e-41	0.219	0.119	hypothetical protein, conserved	N/A
2	LmjF.29.2530	0.243311	7.65233e-39	6.25731e-35	0.231	0.134	hypothetical protein, conserved	N/A
2	LmjF.36.1960	0.243214	7.04927e-44	5.76418e-40	0.136	0.064	phosphomannomutase, putative	phosphomannomutase activity
2	LmjF.22.0420	0.242589	1.98791e-31	1.62551e-27	0.494	0.351	40S ribosomal protein S15, putative	RNA binding;structural constituent of ribosome
2	LmjF.23.1330	0.242519	2.70422e-37	2.21124e-33	0.121	0.058	DNA polymerase zeta catalytic subunit, putative	DNA binding;DNA-directed DNA polymerase activity;nucleic acid binding;nucleotide binding
2	LmjF.04.0590	0.241943	6.82924e-38	5.58427e-34	0.323	0.202	hypothetical protein	N/A
2	LmjF.35.0950	0.241299	2.22663e-47	1.82072e-43	0.242	0.132	cell cycle sequence binding phosphoprotein (RBP33), putative	N/A
2	LmjF.26.1630	0.241283	3.91257e-28	3.19931e-24	0.237	0.151	40S ribosomal protein S33, putative	structural constituent of ribosome
2	LmjF.09.0320	0.24073	4.53336e-29	3.70693e-25	0.129	0.07	hypothetical protein, conserved	N/A
2	LmjF.16.0570	0.240547	2.77141e-33	2.26618e-29	0.541	0.391	histone H3	DNA binding;protein heterodimerization activity
2	LmjF.25.2010	0.24024	3.52956e-33	2.88612e-29	0.622	0.462	2,4-dihydroxyhept-2-ene-1,7-dioic acid aldolase, putative	catalytic activity
2	LmjF.35.2110	0.239874	9.26997e-43	7.58005e-39	0.401	0.255	hypothetical protein, conserved	N/A
2	LmjF.30.1390	0.23975	5.73573e-38	4.69011e-34	0.191	0.106	uncharacterized Cys-rich domain containing protein, putative	N/A
2	LmjF.31.2690	0.239525	7.73606e-47	6.32578e-43	0.278	0.159	hypothetical protein, conserved	N/A
2	LmjF.24.0230	0.238821	4.62815e-40	3.78444e-36	0.117	0.054	CAMK/CAMKL family protein kinase, putative	ATP binding;protein binding;protein kinase activity
2	LmjF.34.0520	0.238781	1.99227e-39	1.62908e-35	0.177	0.094	hypothetical protein, unknown function	N/A
2	LmjF.18.0540	0.238738	1.64659e-36	1.34642e-32	0.171	0.093	hypothetical protein, conserved	N/A
2	LmjF.31.2210	0.238643	7.60487e-43	6.2185e-39	0.259	0.149	hypothetical protein, unknown function	N/A
2	LmjF.19.0930	0.238631	8.00924e-38	6.54915e-34	0.103	0.046	hypothetical protein, conserved	N/A
2	LmjF.29.2320	0.238501	3.60036e-42	2.94401e-38	0.379	0.239	mitogen-activated protein kinase kinase 1	ATP binding;protein kinase activity
2	LmjF.34.2125	0.238405	3.62385e-40	2.96322e-36	0.108	0.048	ubiquitin-like protein	protein binding
2	LmjF.28.1500	0.23835	5.58234e-38	4.56468e-34	0.185	0.102	Protein of unknown function (DUF423), putative	N/A
2	LmjF.08.0600	0.238269	2.87959e-41	2.35464e-37	0.416	0.269	hypothetical protein, unknown function	N/A
2	LmjF.34.0770	0.237845	1.03559e-41	8.468e-38	0.336	0.207	hypothetical protein, conserved	N/A
2	LmjF.14.0640	0.237559	7.92876e-41	6.48335e-37	0.125	0.058	fatty acid elongase, putative	N/A
2	LmjF.19.1345	0.237372	1.37863e-40	1.12731e-36	0.14	0.068	glycerol uptake protein, putative	N/A
2	LmjF.23.1270	0.23721	1.1837e-34	9.6791e-31	0.115	0.056	XPG N-terminal domain/XPG I-region, putative	5'-3' exodeoxyribonuclease activity;nuclease activity
2	LmjF.34.2990	0.237078	1.72364e-31	1.40942e-27	0.183	0.106	hypothetical protein, unknown function	N/A
2	LmjF.31.1780	0.236918	3.27684e-39	2.67947e-35	0.49	0.332	Sphingosine N-acyltransferase, putative	N/A
2	LmjF.26.0980	0.236637	3.71273e-38	3.0359e-34	0.468	0.317	CMGC/SRPK protein kinase, putative	ATP binding;protein kinase activity
2	LmjF.26.0740	0.235879	2.12639e-38	1.73875e-34	0.1	0.044	Regulator of chromosome condensation (RCC1) repeat, putative	N/A
2	LmjF.26.1510	0.235397	3.23633e-37	2.64635e-33	0.141	0.071	hypothetical protein, unknown function	N/A
2	LmjF.36.1265	0.235349	1.34544e-34	1.10017e-30	0.888	0.799	hypothetical protein	N/A
2	LmjF.08.0460	0.235241	1.12288e-43	9.18181e-40	0.221	0.121	hypothetical protein, unknown function	N/A
2	LmjF.18.1300	0.235211	7.25907e-44	5.93574e-40	0.206	0.111	mitochondrial carrier protein, putative	N/A
2	LmjF.07.1030	0.235173	1.0295e-38	8.41819e-35	0.191	0.105	peptidyl-prolyl cis-trans isomerase/rotamase, putative	peptidyl-prolyl cis-trans isomerase activity
2	LmjF.11.0320	0.234169	1.05623e-38	8.6368e-35	0.216	0.123	DNA repair and recombination helicase protein PIF2, putative	DNA helicase activity
2	LmjF.30.1200	0.234154	7.09115e-43	5.79843e-39	0.259	0.149	ubiquitin hydrolase, putative	thiol-dependent ubiquitin-specific protease activity
2	LmjF.06.0470	0.233678	2.15939e-40	1.76573e-36	0.117	0.053	condensin complex subunit 2, putative	N/A
2	LmjF.22.1550	0.233465	3.01015e-36	2.4614e-32	0.209	0.12	hypothetical protein, conserved	N/A
2	LmjF.31.1600	0.233297	1.09723e-39	8.97206e-36	0.179	0.095	hypothetical protein, unknown function	protein binding
2	LmjF.26.2300	0.233263	1.45589e-40	1.19048e-36	0.179	0.095	hypothetical protein, conserved	N/A
2	LmjF.27.2400	0.23312	2.30734e-32	1.88671e-28	0.629	0.462	heat shock protein DNAJ, putative	ATP binding;heat shock protein binding;unfolded protein binding
2	LmjF.34.1555	0.23298	2.4149e-41	1.97467e-37	0.103	0.044	ubiquitin-conjugating enzyme E2, putative	N/A
2	LmjF.28.2970	0.232901	1.12607e-41	9.20784e-38	0.151	0.074	hypothetical protein, conserved	N/A
2	LmjF.25.0670	0.232727	2.99371e-36	2.44796e-32	0.438	0.293	epsin, putative	N/A
2	LmjF.34.0830	0.232489	1.19464e-47	9.76858e-44	0.237	0.128	25 Kd elongation factor 1-beta, putative	N/A
2	LmjF.33.1540	0.232283	3.14229e-42	2.56945e-38	0.189	0.1	elongation factor 1-gamma, putative	protein binding
2	LmjF.30.3330	0.232126	1.45251e-37	1.18772e-33	0.183	0.1	hypothetical protein, conserved	N/A
2	LmjF.35.3880	0.230729	9.35789e-41	7.65194e-37	0.118	0.054	WD domain, G-beta repeat/Sof1-like domain containing protein, putative	protein binding
2	LmjF.36.4170	0.230576	1.44152e-36	1.17873e-32	0.204	0.116	oxidoreductase, putative	oxidoreductase activity;zinc ion binding
2	LmjF.16.0870	0.230498	1.72004e-38	1.40648e-34	0.158	0.082	protein kinase, putative	ATP binding;protein kinase activity
2	LmjF.30.0500	0.230422	5.66216e-38	4.62995e-34	0.136	0.067	hypothetical protein, conserved	N/A
2	LmjF.29.2410	0.230349	5.65325e-41	4.62266e-37	0.175	0.091	acyltransferase, putative	transferase activity, transferring acyl groups
2	LmjF.15.0190	0.230284	7.67435e-38	6.27532e-34	0.121	0.057	cytochrome b5-like Heme/Steroid binding domain containing protein, putative	N/A
2	LmjF.27.1840	0.230094	5.46036e-38	4.46493e-34	0.186	0.102	Dual specificity phosphatase, catalytic domain containing protein, putative	phosphatase activity;protein tyrosine/serine/threonine phosphatase activity
2	LmjF.36.6690	0.229936	5.39879e-40	4.41459e-36	0.186	0.1	f2o10.10 protein-like protein	N/A
2	LmjF.27.0920	0.229762	4.87451e-36	3.98589e-32	0.272	0.167	Protein of unknown function (DUF1295), putative	N/A
2	LmjF.26.2310	0.229189	3.93275e-33	3.21581e-29	0.123	0.062	hypothetical protein, conserved	N/A
2	LmjF.20.0910	0.229005	1.78709e-34	1.4613e-30	0.117	0.057	hypothetical protein, conserved	N/A
2	LmjF.05.0460	0.228429	1.29213e-36	1.05657e-32	0.127	0.062	GTPase, putative	GTP binding
2	LmjF.28.1360	0.228371	2.01324e-43	1.64623e-39	0.18	0.093	haloacid dehalogenase-like hydrolase-like protein	hydrolase activity
2	LmjF.13.0460	0.228211	1.70899e-36	1.39744e-32	0.645	0.476	hypothetical protein, conserved	N/A
2	LmjF.17.0750	0.228109	1.35286e-38	1.10623e-34	0.253	0.149	EF-hand domain pair, putative	calcium ion binding
2	LmjF.31.0620	0.227843	6.83602e-37	5.58981e-33	0.107	0.049	hypothetical protein, conserved	N/A
2	LmjF.35.0750	0.22755	1.04464e-42	8.54202e-39	0.315	0.19	proteasome activator protein pa26, putative	N/A
2	LmjF.36.3440	0.227157	1.04648e-39	8.55705e-36	0.21	0.117	Charged multivesicular body protein 3, putative	N/A
2	LmjF.23.0110	0.226822	3.03022e-45	2.47781e-41	0.334	0.2	GDP-mannose pyrophosphorylase	nucleotidyltransferase activity
2	LmjF.28.0760	0.226505	1.84703e-35	1.51031e-31	0.121	0.059	DNA repair protein, putative	ATP binding;metal ion binding
2	LmjF.10.1200	0.226462	3.1062e-36	2.53994e-32	0.154	0.081	hypothetical protein, conserved	N/A
2	LmjF.06.0415	0.225596	2.03829e-25	1.66671e-21	0.568	0.425	60S ribosomal protein L19, putative	RNA binding;structural constituent of ribosome
2	LmjF.19.0510	0.225426	6.5337e-32	5.34261e-28	0.173	0.099	hypothetical protein, conserved	N/A
2	LmjF.15.0750	0.225336	7.25179e-40	5.92979e-36	0.105	0.046	hypothetical protein, unknown function	N/A
2	LmjF.29.1640	0.22514	2.70803e-35	2.21435e-31	0.236	0.141	ATP-binding cassette protein subfamily H, member 2, putative	ATP binding;ATPase activity
2	LmjF.36.3620	0.224915	1.32994e-29	1.08749e-25	0.85	0.759	EF-hand domain pair, putative	calcium ion binding
2	LmjF.35.1970	0.224873	4.44567e-38	3.63522e-34	0.111	0.05	ubx domain containing protein, putative	protein binding
2	LmjF.36.0670	0.224683	4.07371e-40	3.33107e-36	0.259	0.152	EamA-like transporter family, putative	N/A
2	LmjF.11.0410	0.224437	1.01089e-35	8.26607e-32	0.15	0.078	Nucleolar protein 89, putative	protein binding
2	LmjF.26.2180	0.224348	1.52472e-37	1.24676e-33	0.121	0.058	hypothetical protein, conserved	N/A
2	LmjF.16.0250	0.223993	6.08741e-36	4.97767e-32	0.114	0.054	Protein tyrosine phosphatase PRL-2, putative	phosphatase activity
2	LmjF.07.0910	0.223714	1.24319e-37	1.01656e-33	0.123	0.059	hypothetical protein, conserved	cation channel activity
2	LmjF.26.0520	0.22362	1.34577e-36	1.10043e-32	0.122	0.059	hypothetical protein, conserved (pseudogene)	N/A
2	LmjF.20.1600	0.223543	1.35721e-42	1.10979e-38	0.112	0.049	hypothetical protein, conserved	protein binding
2	LmjF.26.2590	0.223324	8.50683e-31	6.95603e-27	0.101	0.049	Paraquat-inducible protein A, putative	N/A
2	LmjF.27.1240	0.223278	5.82874e-35	4.76616e-31	0.403	0.269	histone H1, putative	N/A
2	LmjF.24.1125	0.222695	8.26666e-36	6.75965e-32	0.12	0.058	hypothetical protein, conserved	N/A
2	LmjF.16.0140	0.222689	5.43276e-36	4.44237e-32	0.122	0.059	eukaryotic translation initiation factor 1A, putative	RNA binding;translation initiation factor activity
2	LmjF.01.0350	0.222254	9.50957e-33	7.77598e-29	0.206	0.121	hypothetical protein, conserved	N/A
2	LmjF.35.0180	0.222114	2.05626e-35	1.6814e-31	0.118	0.057	hypothetical protein, conserved	N/A
2	LmjF.31.0040	0.221939	2.02135e-36	1.65286e-32	0.162	0.086	MFS/sugar transport protein, putative	N/A
2	LmjF.36.0400	0.221496	3.75784e-28	3.07279e-24	0.121	0.064	hypothetical protein, conserved	protein binding
2	LmjF.26.1750	0.221454	5.20798e-33	4.25857e-29	0.14	0.074	hypothetical protein, conserved	N/A
2	LmjF.35.1480	0.221031	1.05771e-33	8.6489e-30	0.503	0.357	arginase	arginase activity;hydrolase activity, acting on carbon-nitrogen (but not peptide) bonds, in linear amidines;metal ion binding
2	LmjF.06.0900	0.220314	1.64983e-30	1.34907e-26	0.149	0.082	protein phosphatase 2C, putative	phosphatase activity;protein serine/threonine phosphatase activity
2	LmjF.33.0210	0.219926	1.75768e-38	1.43726e-34	0.377	0.243	hypothetical protein, unknown function	N/A
2	LmjF.35.3450	0.219918	1.77261e-33	1.44946e-29	0.221	0.132	DNA-repair protein, putative	DNA binding;damaged DNA binding
2	LmjF.21.1760	0.219399	1.95161e-35	1.59583e-31	0.367	0.24	centromere/microtubule binding protein cbf5, putative	RNA binding;pseudouridine synthase activity
2	LmjF.31.2050	0.218652	1.07805e-35	8.81519e-32	0.27	0.165	CRAL/TRIO domain containing protein, putative	N/A
2	LmjF.11.0500	0.218443	5.77659e-36	4.72351e-32	0.186	0.103	hypothetical protein, conserved	N/A
2	LmjF.10.0060	0.217761	4.93301e-34	4.03372e-30	0.165	0.091	thymidylate kinase-like protein	N/A
2	LmjF.33.0510	0.217202	5.0209e-28	4.10559e-24	0.161	0.093	SET domain containing protein, putative	protein binding
2	LmjF.31.2730	0.216694	2.32512e-30	1.90125e-26	0.141	0.076	emp24/gp25L/p24 family/GOLD, putative	N/A
2	LmjF.15.1240	0.216283	6.80752e-38	5.56651e-34	0.131	0.064	nucleoside transporter 1, putative	nucleoside transmembrane transporter activity
2	LmjF.22.1540	0.215695	6.48127e-36	5.29973e-32	0.254	0.153	alanyl-tRNA synthetase, putative	ATP binding;alanine-tRNA ligase activity;aminoacyl-tRNA ligase activity;nucleic acid binding;nucleotide binding
2	LmjF.16.0590	0.215675	2.59646e-39	2.12313e-35	0.263	0.155	carbamoyl-phosphate synthase, putative	ATP binding;argininosuccinate synthase activity;carbamoyl-phosphate synthase (glutamine-hydrolyzing) activity;metal ion binding
2	LmjF.29.0620	0.215174	3.8569e-38	3.15379e-34	0.123	0.058	ATP-binding cassette protein subfamily A, member 10, putative	ATP binding;ATPase activity;ATPase-coupled transmembrane transporter activity
2	LmjF.36.0510	0.215115	8.25126e-36	6.74705e-32	0.12	0.058	mitochondrial carrier protein, putative	N/A
2	LmjF.09.0880	0.214689	6.65514e-34	5.44191e-30	0.325	0.21	histone h1-like protein	N/A
2	LmjF.27.0760	0.214275	6.93431e-25	5.67018e-21	0.822	0.703	ras-related protein RAB1A, putative	GTP binding;GTPase activity
2	LmjF.35.4550	0.213688	5.73671e-35	4.69091e-31	0.288	0.178	hypothetical protein, conserved	protein binding
2	LmjF.21.0540	0.213541	4.57315e-38	3.73946e-34	0.162	0.085	Lupus La protein homolog, putative	RNA binding;nucleic acid binding
2	LmjF.34.0650	0.213434	2.18424e-33	1.78606e-29	0.262	0.162	proteasome regulatory non-ATPase subunit 11, putative	Lys63-specific deubiquitinase activity;isopeptidase activity;metallopeptidase activity;protein binding
2	LmjF.32.2990	0.213319	2.09552e-35	1.71351e-31	0.172	0.094	hypothetical protein, conserved	N/A
2	LmjF.31.2200	0.213209	7.9552e-33	6.50496e-29	0.105	0.05	hypothetical protein, unknown function	N/A
2	LmjF.18.1130	0.212997	1.04384e-39	8.53549e-36	0.41	0.267	Ras-related protein Rab5A, putative	GTP binding;GTPase activity
2	LmjF.35.0080	0.212845	4.16208e-31	3.40334e-27	0.138	0.074	Trk system potassium uptake protein	cation transmembrane transporter activity
2	LmjF.36.0650	0.212805	5.58354e-39	4.56566e-35	0.281	0.169	GPI transamidase component Tta2, putative	N/A
2	LmjF.33.1710	0.212186	1.92715e-37	1.57583e-33	0.235	0.137	CAMK/CAMKL family protein kinase, putative	ATP binding;calcium ion binding;protein kinase activity
2	LmjF.36.4850	0.21205	1.07732e-35	8.80928e-32	0.18	0.1	hypothetical protein, conserved	N/A
2	LmjF.21.1855	0.211982	3.32891e-36	2.72205e-32	0.155	0.081	BolA-like protein, putative	N/A
2	LmjF.17.0735	0.211718	7.62433e-32	6.23441e-28	0.113	0.056	ysine decarboxylase-like protein	N/A
2	LmjF.33.1980	0.211274	7.74324e-45	6.33165e-41	0.192	0.099	NEK family Serine/threonine-protein kinase, putative	ATP binding;protein kinase activity
2	LmjF.24.0220	0.211059	5.30641e-35	4.33905e-31	0.111	0.053	hypothetical protein, unknown function	N/A
2	LmjF.09.0340	0.210093	1.88629e-32	1.54242e-28	0.177	0.1	hypothetical protein, conserved	N/A
2	LmjF.28.1810	0.209945	1.85317e-34	1.51534e-30	0.151	0.08	mitochondrial RNA binding complex 1 subunit, putative	N/A
2	LmjF.19.1010	0.209828	1.10636e-35	9.04667e-32	0.259	0.156	WD domain, G-beta repeat, putative	protein binding
2	LmjF.36.3910	0.20943	2.24391e-28	1.83484e-24	0.657	0.504	S-adenosylhomocysteine hydrolase	adenosylhomocysteinase activity
2	LmjF.14.0160	0.209324	6.27128e-32	5.12803e-28	0.132	0.069	hypothetical protein, conserved	N/A
2	LmjF.22.1510	0.209161	6.33835e-37	5.18287e-33	0.222	0.128	hypothetical protein, unknown function	N/A
2	LmjF.05.0840	0.208889	7.06991e-34	5.78106e-30	0.195	0.112	hypothetical protein, unknown function	N/A
2	LmjF.15.0520	0.208509	8.81191e-29	7.2055e-25	0.159	0.091	ecotin, putative	serine-type endopeptidase inhibitor activity
2	LmjF.33.2670	0.208082	2.43045e-34	1.98738e-30	0.148	0.078	hypothetical protein, conserved	N/A
2	LmjF.21.1740	0.207903	1.03409e-31	8.45576e-28	0.123	0.063	RNA polymerase II, putative	N/A
2	LmjF.32.1290	0.207868	5.93765e-37	4.85522e-33	0.255	0.152	Protein kinase domain containing protein, putative	ATP binding;protein kinase activity
2	LmjF.10.0560	0.207704	2.47187e-36	2.02125e-32	0.168	0.09	zinc binding dehydrogenase-like protein	oxidoreductase activity
2	LmjF.34.1190	0.207365	3.34537e-32	2.73551e-28	0.142	0.076	ATP-dependent RNA helicase-like protein	ATP binding;helicase activity;nucleic acid binding
2	LmjF.33.2550	0.206967	8.23866e-39	6.73676e-35	0.361	0.229	isocitrate dehydrogenase, putative	NAD binding;isocitrate dehydrogenase (NADP+) activity;magnesium ion binding;oxidoreductase activity, acting on the CH-OH group of donors, NAD or NADP as acceptor
2	LmjF.27.0040	0.206766	6.35739e-29	5.19844e-25	0.189	0.113	metallo- peptidase, Clan M- Family M48	metalloendopeptidase activity;peptidase activity
2	LmjF.30.2720	0.206677	7.12376e-31	5.8251e-27	0.18	0.104	GRAM domain containing protein, putative	N/A
2	LmjF.30.2430	0.20634	2.29317e-28	1.87512e-24	0.116	0.061	hypothetical protein, conserved	N/A
2	LmjF.30.2180	0.206254	2.8206e-31	2.3064e-27	0.115	0.058	RNA recognition motif. (a.k.a. RRM, RBD, or RNP domain), putative	nucleic acid binding
2	LmjF.29.2120	0.206066	8.49847e-36	6.9492e-32	0.12	0.058	VIT family, putative	manganese ion transmembrane transporter activity
2	LmjF.13.1700	0.206032	4.38659e-37	3.58692e-33	0.172	0.092	hypothetical protein, unknown function	N/A
2	LmjF.31.1950	0.205924	1.85246e-39	1.51476e-35	0.315	0.193	hypothetical protein, conserved	N/A
2	LmjF.30.2580	0.205684	1.85357e-29	1.51566e-25	0.637	0.48	reticulon domain protein, 22 kDa potentially aggravating protein (paple22)	N/A
2	LmjF.32.0210	0.205522	5.26696e-38	4.3068e-34	0.258	0.153	Histone chaperone Rttp106-like, putative	N/A
2	LmjF.31.0780	0.205033	8.95442e-35	7.32203e-31	0.173	0.095	c2 domain protein, putative	N/A
2	LmjF.03.0310	0.20476	3.65855e-32	2.99159e-28	0.113	0.056	hypothetical protein	N/A
2	LmjF.17.0180	0.204596	3.53187e-33	2.88801e-29	0.296	0.188	receptor-type adenylate cyclase b	N/A
2	LmjF.36.0590	0.204259	1.44066e-33	1.17803e-29	0.295	0.186	Eukaryotic translation initiation factor 4E type 5, putative	RNA binding;translation initiation factor activity
2	LmjF.36.0640	0.203751	2.21358e-31	1.81004e-27	0.117	0.059	ribonuclease H, putative	RNA binding;RNA-DNA hybrid ribonuclease activity;nucleic acid binding
2	LmjF.32.0120	0.203299	7.78606e-26	6.36666e-22	0.162	0.096	MEKK-related kinase 1, putative	ATP binding;protein kinase activity
2	LmjF.34.0050	0.203247	1.74149e-31	1.42401e-27	0.142	0.076	Cleft lip and palate transmembrane protein 1 (CLPTM1), putative	N/A
2	LmjF.22.1500	0.203223	1.77819e-34	1.45403e-30	0.278	0.171	ATP-dependent DEAD/H RNA helicase, putative	ATP binding;helicase activity;nucleic acid binding
2	LmjF.19.1290	0.202978	1.7835e-34	1.45837e-30	0.126	0.063	SPFH domain / Band 7 family, putative	N/A
2	LmjF.06.0350	0.202965	1.27149e-34	1.0397e-30	0.114	0.055	NAD(P)-dependent steroid dehydrogenase protein, putative	3-beta-hydroxy-delta5-steroid dehydrogenase activity;oxidoreductase activity, acting on the CH-OH group of donors, NAD or NADP as acceptor
2	LmjF.18.1030	0.20295	2.24722e-33	1.83755e-29	0.207	0.121	hypothetical protein, conserved	N/A
2	LmjF.22.0060	0.202929	1.36271e-36	1.11429e-32	0.225	0.131	transcription factor-like protein	DNA-binding transcription factor activity;nucleic acid binding;zinc ion binding
2	LmjF.07.0860	0.202726	1.39166e-29	1.13796e-25	0.113	0.058	hypothetical protein, unknown function	N/A
2	LmjF.29.0380	0.20255	3.3104e-31	2.70692e-27	0.138	0.073	Domain of unknown function (DUF3451), putative	N/A
2	LmjF.36.3580	0.202422	3.35111e-30	2.7402e-26	0.231	0.143	Protein of unknown function (DUF2009), putative	N/A
2	LmjF.14.0130	0.202408	4.89548e-38	4.00304e-34	0.37	0.235	inosine-guanine nucleoside hydrolase, putative	N/A
2	LmjF.35.4710	0.202125	9.99051e-37	8.16924e-33	0.217	0.124	170 kDa glucose-regulated protein, putative	N/A
2	LmjF.08.0550	0.201238	2.44882e-35	2.0024e-31	0.403	0.266	eukaryotic translation initiation factor 2 beta subunit, putative	translation initiation factor activity
2	LmjF.35.4700	0.201015	5.26318e-31	4.30371e-27	0.181	0.105	Kinesin-13 6, putative	ATP binding;microtubule binding;microtubule motor activity
2	LmjF.34.2740	0.200143	1.82903e-32	1.4956e-28	0.244	0.149	hypothetical protein, unknown function	N/A
2	LmjF.28.0230	0.200062	8.14171e-36	6.65747e-32	0.193	0.108	hypothetical protein, unknown function	N/A
2	LmjF.30.3190	0.200017	2.78851e-40	2.28016e-36	0.253	0.146	3-hydroxy-3-methylglutaryl-CoA reductase	hydroxymethylglutaryl-CoA reductase (NADPH) activity;oxidoreductase activity, acting on the CH-OH group of donors, NAD or NADP as acceptor;protein binding
2	LmjF.30.3210	0.199935	6.56999e-32	5.37228e-28	0.187	0.108	hypothetical protein, conserved	N/A
2	LmjF.07.0570	0.199566	3.60454e-35	2.94743e-31	0.151	0.079	Nucleolar protein 54, putative	N/A
2	LmjF.21.0780	0.199506	4.20821e-31	3.44105e-27	0.108	0.053	hypothetical protein, conserved	N/A
2	LmjF.29.0820	0.199505	2.93201e-30	2.39751e-26	0.72	0.564	CPC cysteine peptidase, Clan CA, family C1, Cathepsin B-like	cysteine-type peptidase activity
2	LmjF.33.1860	0.199182	7.62158e-42	6.23217e-38	0.282	0.166	glycosomal transporter (GAT2), putative	ATP binding;ATPase activity;ATPase-coupled transmembrane transporter activity
2	LmjF.23.0240	0.199087	3.34303e-30	2.7336e-26	0.219	0.134	terbinafine resistance locus protein (yip1)	N/A
2	LmjF.35.3380	0.198907	7.16767e-30	5.861e-26	0.166	0.095	poly A polymerase regulatory subunit, putative	mRNA (nucleoside-2'-O-)-methyltransferase activity
2	LmjF.05.0140	0.198808	5.32105e-33	4.35102e-29	0.138	0.072	nucleolar RNA helicase II, putative	ATP binding;RNA binding;helicase activity;nucleic acid binding
2	LmjF.08.0850	0.19873	6.92769e-30	5.66477e-26	0.1	0.048	amastin-like protein	N/A
2	LmjF.35.1640	0.198273	6.89453e-34	5.63766e-30	0.142	0.074	hypothetical protein, unknown function	N/A
2	LmjF.31.2340	0.198194	5.24508e-31	4.2889e-27	0.149	0.081	p-nitrophenylphosphatase, putative	N/A
2	LmjF.28.1995	0.198117	1.2013e-31	9.82303e-28	0.141	0.075	hypothetical protein, conserved	N/A
2	LmjF.03.0840	0.197897	4.71795e-33	3.85787e-29	0.103	0.048	hypothetical protein, conserved	N/A
2	LmjF.20.1210	0.197859	1.96474e-35	1.60657e-31	0.196	0.111	calpain-like cysteine peptidase, putative	calcium-dependent cysteine-type endopeptidase activity
2	LmjF.20.1110	0.197305	2.49604e-34	2.04101e-30	0.306	0.193	hypothetical protein, conserved	N/A
2	LmjF.06.0020	0.19726	9.18143e-30	7.50766e-26	0.114	0.058	hypothetical protein, conserved	N/A
2	LmjF.05.0800	0.197098	4.27427e-41	3.49507e-37	0.18	0.095	MYND zinc finger (ZnF) domain-like protein	N/A
2	LmjF.14.0560	0.196375	7.06631e-31	5.77812e-27	0.17	0.096	hypothetical protein, unknown function	N/A
2	LmjF.15.0240	0.196347	8.10809e-30	6.62998e-26	0.131	0.07	sterol carrier protein, putative	transferase activity, transferring acyl groups;transferase activity, transferring acyl groups other than amino-acyl groups
2	LmjF.32.3280	0.195627	1.08817e-38	8.89795e-35	0.243	0.141	hypothetical protein, conserved	N/A
2	LmjF.35.2940	0.195416	1.30051e-29	1.06342e-25	0.134	0.072	Leucine carboxyl methyltransferase/Cupin-like domain containing protein, putative	DNA binding;methyltransferase activity;protein binding
2	LmjF.35.0370	0.194971	1.9682e-29	1.6094e-25	0.593	0.446	ATP-dependent DEAD-box RNA helicase, putative	ATP binding;helicase activity;nucleic acid binding
2	LmjF.03.0080	0.1946	6.26935e-34	5.12645e-30	0.213	0.125	glycerol-3-phosphate acyl transferase	transferase activity, transferring acyl groups
2	LmjF.21.0861	0.194444	1.55876e-26	1.2746e-22	0.123	0.067	hypothetical protein	N/A
2	LmjF.14.0770	0.194248	2.11845e-35	1.73226e-31	0.163	0.088	hypothetical protein, unknown function	N/A
2	LmjF.31.2800	0.194222	5.66093e-30	4.62894e-26	0.136	0.073	hypothetical protein, unknown function	N/A
2	LmjF.20.1340	0.193902	3.44032e-35	2.81315e-31	0.188	0.105	protein kinase, putative	ATP binding;protein kinase activity
2	LmjF.02.0660	0.193859	1.43178e-35	1.17077e-31	0.11	0.052	Nop14-like family, putative	N/A
2	LmjF.28.0490	0.193686	2.09523e-34	1.71327e-30	0.183	0.102	propionyl-coa carboxylase beta chain, putative	ligase activity
2	LmjF.35.0200	0.193396	6.13965e-20	5.02039e-16	0.325	0.228	hypothetical protein, conserved	N/A
2	LmjF.28.1350	0.193391	3.23201e-33	2.64281e-29	0.207	0.12	haloacid dehalogenase-like hydrolase-like protein	N/A
2	LmjF.30.1440	0.193371	3.69593e-35	3.02216e-31	0.179	0.099	hypothetical protein, conserved	N/A
2	LmjF.31.0300	0.193224	3.93921e-24	3.22109e-20	0.158	0.095	CRAL/TRIO domain containing protein, putative	N/A
2	LmjF.22.1380	0.193135	1.08294e-34	8.85521e-31	0.158	0.084	mak-16-like RNA binding protein, putative	N/A
2	LmjF.12.0620	0.192946	1.16758e-27	9.54734e-24	0.154	0.088	hypothetical protein, conserved	N/A
2	LmjF.28.0150	0.192942	6.23224e-32	5.0961e-28	0.123	0.063	major facilitator superfamily, putative	transmembrane transporter activity
2	LmjF.02.0620	0.192693	3.06189e-34	2.50371e-30	0.114	0.055	hypothetical protein, conserved	protein binding
2	LmjF.13.0480	0.192649	5.55441e-31	4.54184e-27	0.175	0.1	TATA element modulatory factor 1 TATA binding, putative	N/A
2	LmjF.36.2050	0.192528	1.30437e-29	1.06658e-25	0.123	0.064	kinetoplastid-specific phospho-protein phosphatase, putative	hydrolase activity
2	LmjF.34.3220	0.19233	6.06533e-29	4.95962e-25	0.145	0.08	aminophospholipid translocase, putative	ATP binding;ATPase-coupled intramembrane lipid transporter activity;magnesium ion binding;nucleotide binding
2	LmjF.07.0470	0.192153	5.95918e-37	4.87282e-33	0.113	0.053	pre-rrna-processing protein tsr1 homolog	N/A
2	LmjF.23.0640	0.191939	5.36932e-23	4.3905e-19	0.652	0.508	hypothetical protein, conserved	N/A
2	LmjF.15.0150	0.191867	2.32054e-32	1.89751e-28	0.208	0.123	hypothetical protein, unknown function	N/A
2	LmjF.30.3340	0.191673	9.64567e-13	7.88726e-09	0.59	0.483	60S ribosomal protein L9, putative	rRNA binding;structural constituent of ribosome
2	LmjF.15.0330	0.19162	4.84083e-28	3.95834e-24	0.187	0.112	alpha/beta hydrolase fold, putative	hydrolase activity
2	LmjF.36.1360	0.191469	1.0974e-36	8.97346e-33	0.186	0.102	adenylate kinase, putative	ATP binding;adenylate kinase activity;nucleobase-containing compound kinase activity;phosphotransferase activity, phosphate group as acceptor
2	LmjF.23.0990	0.191221	6.07357e-32	4.96636e-28	0.444	0.305	hypothetical protein, conserved	N/A
2	LmjF.35.2725	0.190712	5.21515e-37	4.26443e-33	0.148	0.076	hypothetical protein	N/A
2	LmjF.13.0490	0.190301	1.33825e-29	1.09429e-25	0.184	0.108	Histidine phosphatase superfamily (branch 1), putative	N/A
2	LmjF.36.1570	0.190083	6.95187e-33	5.68454e-29	0.115	0.057	hypothetical protein, conserved	N/A
2	LmjF.27.1320	0.189796	1.52681e-36	1.24847e-32	0.129	0.064	Cupin-like domain containing protein, putative	N/A
2	LmjF.31.0130	0.189781	1.00134e-29	8.18796e-26	0.139	0.076	hypothetical protein, unknown function	N/A
2	LmjF.28.1820	0.189683	2.24764e-30	1.8379e-26	0.206	0.123	Replication factor A protein 1	DNA binding;nucleic acid binding
2	LmjF.01.0600	0.189444	2.75163e-32	2.25001e-28	0.133	0.069	Rab-GTPase-TBC domain containing protein, putative	N/A
2	LmjF.04.0740	0.189408	8.44299e-26	6.90383e-22	0.112	0.06	hypothetical protein, conserved	N/A
2	LmjF.35.2540	0.188427	1.15778e-32	9.46716e-29	0.168	0.093	hypothetical protein, unknown function	N/A
2	LmjF.16.0970	0.188398	7.31506e-33	5.98153e-29	0.108	0.052	hypothetical protein, conserved	N/A
2	LmjF.06.1030	0.188257	1.01006e-27	8.25928e-24	0.139	0.078	kinesin, putative	ATP binding;microtubule binding;microtubule motor activity
2	LmjF.31.1300	0.188223	2.41081e-31	1.97132e-27	0.17	0.096	hypothetical protein, conserved	N/A
2	LmjF.27.2270	0.188142	8.96463e-33	7.33037e-29	0.244	0.148	hypothetical protein, conserved	N/A
2	LmjF.31.0570	0.18771	3.56988e-31	2.91909e-27	0.127	0.066	amino acid transporter aATP11, putative	N/A
2	LmjF.36.1170	0.187669	1.2915e-30	1.05606e-26	0.301	0.195	hypothetical protein, conserved	N/A
2	LmjF.35.2850	0.18748	1.65285e-30	1.35153e-26	0.174	0.1	RNA polymerase-associated protein LEO1, putative	N/A
2	LmjF.11.0840	0.186971	5.18909e-28	4.24312e-24	0.165	0.095	Alpha/beta hydrolase family, putative	N/A
2	LmjF.17.1250	0.186883	6.73877e-33	5.51029e-29	0.134	0.069	RNA cytidine acetyltransferase	ATP binding;N-acetyltransferase activity
2	LmjF.31.1930	0.186881	4.75696e-34	3.88977e-30	0.189	0.107	dihydrouridine synthase (Dus), putative	flavin adenine dinucleotide binding;tRNA dihydrouridine synthase activity
2	LmjF.07.0490	0.186852	1.54441e-34	1.26286e-30	0.31	0.194	hypothetical protein, conserved	protein binding
2	LmjF.33.1355	0.186237	1.63695e-30	1.33853e-26	0.129	0.068	iron-sulfur cluster assembly protein, putative	N/A
2	LmjF.36.0210	0.185272	1.03753e-25	8.48388e-22	0.245	0.159	SET domain protein, putative	protein binding
2	LmjF.31.2180	0.185207	3.42204e-36	2.79821e-32	0.105	0.048	hypothetical protein, unknown function	N/A
2	LmjF.35.4630	0.184742	7.27417e-33	5.94809e-29	0.267	0.165	chaperone protein DnaJ, putative	N/A
2	LmjF.19.0760	0.184572	3.49184e-35	2.85528e-31	0.229	0.134	transporter, putative	N/A
2	LmjF.21.1540	0.184564	2.45842e-25	2.01025e-21	0.152	0.089	Sec8 exocyst complex component specific domain containing protein, putative	N/A
2	LmjF.20.1660	0.184464	5.85045e-30	4.78391e-26	0.119	0.061	hypothetical protein, conserved	N/A
2	LmjF.32.2030	0.184461	1.41205e-25	1.15463e-21	0.1	0.051	Ras-related protein RAB2B, putative	GTP binding;GTPase activity
2	LmjF.14.0570	0.184043	1.96077e-27	1.60332e-23	0.173	0.102	WD domain, G-beta repeat, putative	protein binding
2	LmjF.31.1890	0.184033	1.72843e-33	1.41334e-29	0.167	0.092	peptidase m20/m25/m40 family-like protein	hydrolase activity
2	LmjF.36.4520	0.183934	1.21501e-27	9.93517e-24	0.129	0.07	hypothetical protein, conserved	N/A
2	LmjF.31.3180	0.183758	1.6953e-32	1.38625e-28	0.237	0.143	histone H4	DNA binding;protein heterodimerization activity
2	LmjF.31.1820	0.183684	2.82502e-30	2.31002e-26	0.505	0.356	amino acid permease	N/A
2	LmjF.30.3080	0.183081	1.16113e-23	9.49453e-20	0.136	0.079	homoserine kinase	ATP binding;homoserine kinase activity
2	LmjF.34.0810	0.182897	1.90409e-33	1.55698e-29	0.218	0.128	serine/threonine-protein phosphatase PP1, putative	hydrolase activity
2	LmjF.22.1440	0.18241	7.11923e-35	5.8214e-31	0.212	0.122	hypothetical protein, conserved	N/A
2	LmjF.24.1390	0.182245	7.84209e-29	6.41248e-25	0.137	0.075	Zinc finger, C3HC4 type (RING finger)/EF-hand domain pair, putative	calcium ion binding
2	LmjF.31.0800	0.182227	1.96184e-27	1.60419e-23	0.198	0.121	hypothetical protein, conserved	N/A
2	LmjF.28.0750	0.182096	1.24923e-29	1.02149e-25	0.19	0.113	hypothetical protein, conserved	N/A
2	LmjF.03.0280	0.181815	1.16164e-30	9.49871e-27	0.132	0.069	hypothetical protein	N/A
2	LmjF.16.1640	0.181541	7.94342e-25	6.49533e-21	0.154	0.091	hypothetical protein, unknown function	protein binding
2	LmjF.28.1950	0.181188	6.79438e-33	5.55576e-29	0.381	0.252	X-pro, dipeptidyl-peptidase,serine peptidase, Clan SC, family S15, putative	dipeptidyl-peptidase activity;hydrolase activity
2	LmjF.11.1190	0.180994	1.47364e-18	1.205e-14	0.531	0.41	40S ribosomal protein S15A, putative	structural constituent of ribosome
2	LmjF.13.1210	0.180515	4.1876e-30	3.4242e-26	0.903	0.821	nucleobase transporter	nucleoside transmembrane transporter activity
2	LmjF.14.1160	0.180485	1.88116e-16	1.53823e-12	0.772	0.658	enolase	magnesium ion binding;phosphopyruvate hydratase activity
2	LmjF.36.0420	0.180383	2.64667e-25	2.16419e-21	0.154	0.091	amino acid permease-like protein	N/A
2	LmjF.28.0020	0.18032	8.76569e-27	7.1677e-23	0.153	0.089	Present in the outer mitochondrial membrane proteome 15	N/A
2	LmjF.06.1270	0.180004	2.038e-33	1.66647e-29	0.171	0.095	coproporphyrinogen III oxidase	coproporphyrinogen oxidase activity
2	LmjF.33.2750	0.179904	5.47567e-29	4.47745e-25	0.11	0.056	Domain of unknown function (DUF4520), putative	N/A
2	LmjF.26.0020	0.179903	1.57143e-26	1.28496e-22	0.103	0.053	methylmalonyl-coa epimerase-like protein	N/A
2	LmjF.32.2050	0.179766	4.50172e-32	3.68106e-28	0.17	0.095	hypothetical protein, unknown function	N/A
2	LmjF.30.0820	0.179289	3.44518e-31	2.81712e-27	0.15	0.082	hypothetical protein, conserved	N/A
2	LmjF.31.0640	0.178884	3.22391e-26	2.63619e-22	0.102	0.052	mitochondrial RNA binding protein, putative	N/A
2	LmjF.24.0670	0.178522	1.89449e-26	1.54913e-22	0.11	0.058	Cell division protein kinase, putative	ATP binding;protein kinase activity
2	LmjF.11.1070	0.178406	9.76056e-32	7.98121e-28	0.124	0.063	hypothetical protein	N/A
2	LmjF.30.2020	0.178401	2.95847e-27	2.41914e-23	0.101	0.051	hypothetical protein, unknown function	N/A
2	LmjF.36.4940	0.178366	4.84818e-26	3.96436e-22	0.133	0.074	Uncharacterized protein family UPF0029, putative	protein binding
2	LmjF.01.0210	0.17821	9.34785e-32	7.64374e-28	0.127	0.066	CUE domain/Domain of unknown function (DUF1771)/Smr domain containing protein, putative	metal ion binding;protein binding;ubiquitin binding
2	LmjF.26.1990	0.178023	2.08354e-27	1.70371e-23	0.198	0.12	hypothetical protein, conserved	N/A
2	LmjF.31.1990	0.177868	5.47152e-34	4.47406e-30	0.247	0.149	hypothetical protein, unknown function	N/A
2	LmjF.25.1580	0.177731	1.96778e-32	1.60905e-28	0.361	0.238	casein kinase I, putative	ATP binding;protein kinase activity
2	LmjF.25.0840	0.177623	2.08098e-24	1.70162e-20	0.157	0.094	hypothetical protein, conserved	N/A
2	LmjF.30.1740	0.177415	1.7579e-30	1.43744e-26	0.109	0.054	hypothetical protein, unknown function	N/A
2	LmjF.36.6650	0.177308	4.39154e-23	3.59096e-19	0.372	0.264	2,3-bisphosphoglycerate-independent phosphoglycerate mutase	catalytic activity;manganese ion binding;metal ion binding;phosphoglycerate mutase activity
2	LmjF.35.1020	0.176496	6.11389e-34	4.99933e-30	0.263	0.161	hypothetical protein, unknown function	metal ion binding
2	LmjF.32.0560	0.176477	2.69914e-29	2.20709e-25	0.184	0.108	hypothetical protein, conserved	N/A
2	LmjF.10.1225	0.176306	2.00313e-27	1.63796e-23	0.135	0.075	hypothetical protein, conserved	N/A
2	LmjF.28.2070	0.175846	6.51089e-35	5.32395e-31	0.189	0.105	tRNA threonylcarbamoyl adenosine modification protein, Sua5/YciO/YrdC/YwlC family, putative	double-stranded RNA binding
2	LmjF.26.0800	0.17574	3.43936e-29	2.81237e-25	0.23	0.142	type II (glutathione peroxidase-like) tryparedoxin peroxidase	glutathione peroxidase activity
2	LmjF.19.0630	0.175566	3.13144e-24	2.56058e-20	0.571	0.423	histone H3 variant V	DNA binding;protein heterodimerization activity
2	LmjF.24.2180	0.175531	1.713e-30	1.40072e-26	0.217	0.131	Trypanosome basal body component protein	N/A
2	LmjF.27.0860	0.175249	3.0248e-31	2.47338e-27	0.259	0.161	WD domain, G-beta repeat, putative	protein binding
2	LmjF.06.0510	0.17494	1.55233e-29	1.26934e-25	0.217	0.132	U-box domain containing protein, putative	ubiquitin-protein transferase activity
2	LmjF.12.0110	0.174895	6.16508e-26	5.04119e-22	0.113	0.06	hypothetical protein, conserved	metal ion binding
2	LmjF.36.4180	0.174881	1.15629e-28	9.455e-25	0.206	0.125	UDP-N-acetylglucosamine-dolichyl-phosphate N-acetylglucosaminephosphotransferase, putative	UDP-N-acetylglucosamine-dolichyl-phosphate N-acetylglucosaminephosphotransferase activity;phospho-N-acetylmuramoyl-pentapeptide-transferase activity
2	LmjF.23.1150	0.174631	1.16192e-27	9.501e-24	0.121	0.065	hypothetical protein, conserved	N/A
2	LmjF.27.2300	0.174531	5.90951e-33	4.8322e-29	0.324	0.208	transcription elongation regulator-like protein	N/A
2	LmjF.35.1030	0.173957	1.01875e-28	8.33035e-25	0.226	0.14	zinc finger protein family member, putative	N/A
2	LmjF.22.0880	0.173909	2.89378e-28	2.36625e-24	0.107	0.054	hypothetical protein, conserved	N/A
2	LmjF.08.0870	0.173703	1.5259e-28	1.24773e-24	0.203	0.124	hypothetical protein, unknown function	N/A
2	LmjF.18.0680	0.173595	6.72366e-24	5.49793e-20	0.654	0.509	citrate synthase, putative	citrate (Si)-synthase activity;transferase activity, transferring acyl groups, acyl groups converted into alkyl on transfer
2	LmjF.26.1600	0.173531	4.3064e-29	3.52134e-25	0.212	0.129	hypothetical protein, unknown function	N/A
2	LmjF.16.1005	0.173483	2.72295e-24	2.22656e-20	0.104	0.055	Protein of unknown function (DUF3184), putative	N/A
2	LmjF.15.0710	0.173277	5.72292e-26	4.67963e-22	0.105	0.055	hypothetical protein, conserved	N/A
2	LmjF.36.5570	0.172754	2.04458e-26	1.67185e-22	0.146	0.083	emp24/gp25L/p24 family/GOLD, putative	N/A
2	LmjF.27.0890	0.172629	7.01072e-26	5.73267e-22	0.12	0.065	phosphatidylinositol (3,5) kinase, putative	metal ion binding;phosphatidylinositol phosphate kinase activity
2	LmjF.08.0970	0.172385	7.02008e-24	5.74032e-20	0.11	0.06	Protein of unknown function (DUF2453), putative	calcium ion binding
2	LmjF.07.0760	0.172364	6.41351e-25	5.24433e-21	0.191	0.118	6-phosphofructo-2-kinase/fructose-2,6-biphosphatase, putative	6-phosphofructo-2-kinase activity;ATP binding;catalytic activity
2	LmjF.36.5130	0.17226	1.84152e-28	1.50581e-24	0.238	0.149	hypothetical protein, conserved	N/A
2	LmjF.33.2260	0.172249	2.83093e-26	2.31485e-22	0.138	0.078	glycosyl hydrolase-like protein	mannosyl-glycoprotein endo-beta-N-acetylglucosaminidase activity
2	LmjF.30.1850	0.17208	1.15369e-34	9.43373e-31	0.219	0.128	phosphatidylinositol kinase, putative	kinase activity;metal ion binding
2	LmjF.29.1490	0.172073	1.19871e-27	9.80189e-24	0.316	0.209	asparagine synthase, putative	asparagine synthase (glutamine-hydrolyzing) activity
2	LmjF.11.0120	0.172038	5.19395e-26	4.24709e-22	0.32	0.215	hypothetical protein, conserved	N/A
2	LmjF.05.0285	0.171952	2.53881e-29	2.07598e-25	0.123	0.064	ARP2/3 complex 16kDa subunit, putative	N/A
2	LmjF.32.1920	0.171941	4.3755e-29	3.57785e-25	0.135	0.073	Vitamin B6 photo-protection and homoeostasis, putative	N/A
2	LmjF.35.0730	0.171923	3.97353e-22	3.24915e-18	0.144	0.087	hypothetical protein, conserved	protein binding
2	LmjF.03.0410	0.171691	1.23216e-29	1.00753e-25	0.373	0.251	MFS transporter, putative	transmembrane transporter activity
2	LmjF.03.0430	0.171627	4.52209e-28	3.69771e-24	0.255	0.162	60S acidic ribosomal protein P2, putative	structural constituent of ribosome
2	LmjF.31.1240	0.171516	4.85276e-30	3.96811e-26	0.172	0.099	hypothetical protein, conserved	N/A
2	LmjF.20.1570	0.171138	8.76938e-30	7.17072e-26	0.395	0.267	amidohydrolase, putative	hydrolase activity
2	LmjF.28.2170	0.170906	8.4104e-36	6.87718e-32	0.261	0.157	Mitochondrial import receptor subunit ATOM69, putative	protein binding
2	LmjF.10.0360	0.170901	1.26222e-27	1.03212e-23	0.158	0.091	folate/biopterin transporter, putative	N/A
2	LmjF.09.0900	0.170675	2.49596e-27	2.04094e-23	0.238	0.151	ef-hand protein 5, putative	calcium ion binding
2	LmjF.36.4840	0.170192	1.10645e-27	9.04745e-24	0.127	0.069	Leucine-rich repeat domain containing protein	protein binding
2	LmjF.31.1640	0.170052	3.93381e-29	3.21668e-25	0.153	0.086	thiolase protein-like protein	transferase activity, transferring acyl groups;transferase activity, transferring acyl groups other than amino-acyl groups
2	LmjF.32.2110	0.16997	6.86869e-32	5.61653e-28	0.133	0.069	hypothetical protein, conserved	N/A
2	LmjF.06.1070	0.169448	4.06541e-26	3.32429e-22	0.121	0.066	deoxyribose-phosphate aldolase, putative	catalytic activity;deoxyribose-phosphate aldolase activity;lyase activity
2	LmjF.24.0070	0.169345	4.85506e-28	3.96998e-24	0.101	0.05	hypothetical protein, conserved	N/A
2	LmjF.34.0660	0.169233	1.9988e-23	1.63442e-19	0.119	0.067	hypothetical protein, unknown function	N/A
2	LmjF.22.1280	0.169195	1.6151e-29	1.32067e-25	0.205	0.124	hypothetical protein, unknown function	N/A
2	LmjF.23.1460	0.168918	7.55312e-27	6.17619e-23	0.121	0.065	GAF domain/TIP41-like family, putative	protein binding
2	LmjF.13.1510	0.168856	9.14513e-31	7.47797e-27	0.185	0.107	kinetoplastid-specific phospho-protein phosphatase, putative	hydrolase activity
2	LmjF.27.1650	0.168852	1.10399e-27	9.02733e-24	0.185	0.11	hypothetical protein, conserved	N/A
2	LmjF.20.1380	0.1687	4.52809e-26	3.70262e-22	0.171	0.102	hypothetical protein, conserved	protein binding
2	LmjF.10.1090	0.16857	2.32894e-29	1.90438e-25	0.261	0.165	hypothetical protein, conserved	N/A
2	LmjF.28.0240	0.168561	1.36236e-29	1.114e-25	0.358	0.239	glycerol-3-phosphate dehydrogenase (FAD-dependent), mitochondrial	glycerol-3-phosphate dehydrogenase (quinone) activity;oxidoreductase activity
2	LmjF.27.1700	0.168494	9.05375e-26	7.40325e-22	0.149	0.086	hypothetical protein, conserved	ATP binding
2	LmjF.18.0140	0.168324	1.10774e-29	9.05803e-26	0.114	0.058	Domain of unknown function DUF21, putative	N/A
2	LmjF.21.0240	0.168064	7.70023e-20	6.29648e-16	0.859	0.77	hexokinase, putative	ATP binding;glucose binding;hexokinase activity;phosphotransferase activity, alcohol group as acceptor
2	LmjF.25.2210	0.167859	7.61142e-27	6.22386e-23	0.257	0.166	hypothetical protein, conserved	protein binding
2	LmjF.34.0860	0.167621	1.033e-19	8.44683e-16	0.487	0.364	60S ribosomal protein L13a, putative	structural constituent of ribosome
2	LmjF.21.0080	0.167155	9.10092e-24	7.44182e-20	0.162	0.098	major facilitator superfamily, putative	transmembrane transporter activity
2	LmjF.30.3050	0.167113	7.16267e-27	5.85692e-23	0.326	0.218	STE/STE11 serine/threonine-protein kinase, putative	ATP binding;protein kinase activity
2	LmjF.18.1140	0.16671	6.97318e-27	5.70197e-23	0.101	0.051	hypothetical protein, conserved	N/A
2	LmjF.36.1920	0.166686	3.492e-30	2.85541e-26	0.232	0.142	hypothetical protein, conserved	N/A
2	LmjF.35.0440	0.166659	9.5067e-30	7.77363e-26	0.262	0.165	Arrestin (or S-antigen), N-terminal domain containing protein, putative	N/A
2	LmjF.31.0070	0.166589	1.62162e-24	1.326e-20	0.189	0.117	helicase-like protein	ATP binding;DNA binding;hydrolase activity
2	LmjF.36.6060	0.166089	1.83599e-32	1.50129e-28	0.361	0.237	eukaryotic translation initiation factor 4 gamma 4	RNA binding;protein binding
2	LmjF.26.0350	0.16581	2.27616e-25	1.86122e-21	0.115	0.062	Vps52 / Sac2 family, putative	N/A
2	LmjF.07.0920	0.165167	2.85088e-26	2.33116e-22	0.235	0.15	Protein of unknown function (DUF3608), putative	GTPase activator activity
2	LmjF.23.0910	0.164777	2.63227e-26	2.1524e-22	0.193	0.118	hypothetical protein, unknown function (pseudogene)	N/A
2	LmjF.32.0930	0.16474	8.23962e-22	6.73754e-18	0.131	0.077	FAD dependent oxidoreductase, putative	flavin adenine dinucleotide binding;oxidoreductase activity, acting on CH-OH group of donors
2	LmjF.16.0310	0.164373	4.75314e-30	3.88664e-26	0.134	0.072	Met-10+ like-protein, putative	tRNA (guanine-N1-)-methyltransferase activity
2	LmjF.23.1410	0.164281	3.1018e-27	2.53634e-23	0.185	0.111	succinate dehydrogenase and fumarate reductase iron-sulfur protein, putative	electron transfer activity;iron-sulfur cluster binding;oxidoreductase activity
2	LmjF.02.0440	0.164202	2.21533e-28	1.81147e-24	0.123	0.065	amino acid permease, putative	N/A
2	LmjF.17.0020	0.164086	5.2477e-24	4.29104e-20	0.11	0.06	Protein of unknown function (DUF3522), putative	N/A
2	LmjF.28.0480	0.163513	3.8308e-26	3.13245e-22	0.164	0.097	carbonic anhydrase-like protein	carbonate dehydratase activity;zinc ion binding
2	LmjF.10.0200	0.163493	6.14706e-23	5.02645e-19	0.542	0.401	Mitogen-activated protein kinase 10, putative	ATP binding;protein kinase activity
2	LmjF.02.0100	0.163438	1.01601e-27	8.30788e-24	0.122	0.065	hypothetical protein, conserved (pseudogene)	N/A
2	LmjF.34.3955	0.163326	6.24383e-35	5.10558e-31	0.249	0.149	hypothetical protein, conserved	N/A
2	LmjF.15.0440	0.16297	9.02687e-25	7.38127e-21	0.121	0.067	tb-292 membrane associated protein-like protein (pseudogene)	N/A
2	LmjF.17.0815	0.162781	1.42872e-30	1.16826e-26	0.167	0.094	G-patch domain containing protein, putative	nucleic acid binding
2	LmjF.31.0460	0.162587	4.20144e-31	3.43552e-27	0.214	0.127	calpain-like cysteine peptidase, putative	calcium-dependent cysteine-type endopeptidase activity
2	LmjF.33.0900	0.16233	1.4093e-27	1.15238e-23	0.165	0.096	dnaj chaperone-like protein	N/A
2	LmjF.33.2010	0.162222	4.54272e-29	3.71459e-25	0.29	0.187	calpain protease-like protein	calcium-dependent cysteine-type endopeptidase activity
2	LmjF.36.1460	0.161811	4.45541e-23	3.64319e-19	0.131	0.075	hypothetical protein, conserved	N/A
2	LmjF.31.1420	0.161744	1.91822e-23	1.56853e-19	0.179	0.111	hypothetical protein, conserved	N/A
2	LmjF.23.1140	0.161473	1.0027e-26	8.19911e-23	0.159	0.092	hypothetical protein, conserved	N/A
2	LmjF.32.3450	0.161311	1.92223e-30	1.5718e-26	0.21	0.126	zinc-finger of a C2HC-type, putative	N/A
2	LmjF.11.0660	0.161153	3.51889e-28	2.87739e-24	0.119	0.063	Protein Associated with Differentiation, putative	N/A
2	LmjF.22.0130	0.161124	5.00151e-32	4.08974e-28	0.261	0.161	hypothetical protein, conserved	N/A
2	LmjF.27.0270	0.160955	2.10966e-25	1.72507e-21	0.183	0.111	hypothetical protein, conserved	N/A
2	LmjF.31.1750	0.16072	4.26983e-32	3.49144e-28	0.269	0.166	nucleosome assembly protein-like protein	N/A
2	LmjF.24.0020	0.160493	7.35971e-21	6.01803e-17	0.103	0.057	clathrin coat assembly protein, putative	1-phosphatidylinositol binding;clathrin binding;phospholipid binding
2	LmjF.10.0140	0.160476	6.66641e-28	5.45112e-24	0.306	0.201	DEAD/DEAH box helicase, putative	ATP binding;helicase activity;nucleic acid binding
2	LmjF.25.2220	0.160381	8.21917e-29	6.72082e-25	0.185	0.109	hypothetical protein, conserved	N/A
2	LmjF.30.2330	0.160369	4.24747e-20	3.47316e-16	0.214	0.143	hypothetical protein, unknown function	N/A
2	LmjF.28.1280	0.159812	4.96632e-29	4.06096e-25	0.31	0.202	phenylalanine-4-hydroxylase	iron ion binding;monooxygenase activity;oxidoreductase activity, acting on paired donors, with incorporation or reduction of molecular oxygen, reduced pteridine as one donor, and incorporation of one atom of oxygen
2	LmjF.31.1900	0.159694	1.87516e-25	1.53332e-21	0.414	0.29	ubiquitin-fusion protein	protein binding;structural constituent of ribosome
2	LmjF.13.0620	0.15943	1.59943e-22	1.30785e-18	0.121	0.069	hypothetical protein, conserved	N/A
2	LmjF.24.1600	0.159317	5.82559e-23	4.76359e-19	0.182	0.114	hypothetical protein, unknown function	N/A
2	LmjF.30.1580	0.158652	2.0236e-27	1.6547e-23	0.161	0.093	hypothetical protein, conserved	N/A
2	LmjF.16.0400	0.158568	7.54188e-29	6.167e-25	0.259	0.163	hypothetical protein, conserved	N/A
2	LmjF.34.0730	0.158255	2.26031e-28	1.84825e-24	0.119	0.062	Stage II sporulation protein E (SpoIIE), putative	phosphatase activity
2	LmjF.09.1210	0.158158	5.7729e-26	4.7205e-22	0.108	0.056	Zinc finger, C3HC4 type (RING finger), putative	N/A
2	LmjF.23.0170	0.157871	5.21657e-26	4.26559e-22	0.124	0.068	hypothetical protein, conserved	N/A
2	LmjF.13.1360	0.157794	8.01995e-30	6.55791e-26	0.331	0.217	hypothetical protein, conserved	N/A
2	LmjF.35.1590	0.157673	1.23839e-26	1.01263e-22	0.262	0.169	hypothetical protein, conserved	N/A
2	LmjF.25.1445	0.157575	4.56625e-28	3.73382e-24	0.151	0.085	Present in the outer mitochondrial membrane proteome 23	oxidoreductase activity, acting on the CH-CH group of donors
2	LmjF.10.1130	0.157337	7.02655e-28	5.74561e-24	0.192	0.115	hypothetical protein, conserved	N/A
2	LmjF.28.2510	0.156983	2.00662e-29	1.64081e-25	0.156	0.087	acyl-CoA dehydrogenase, putative	flavin adenine dinucleotide binding;oxidoreductase activity, acting on the CH-CH group of donors
2	LmjF.25.0340	0.156645	6.4655e-30	5.28684e-26	0.172	0.098	Ring finger domain containing protein, putative	N/A
2	LmjF.26.1330	0.156362	8.19986e-23	6.70503e-19	0.313	0.216	hypothetical protein, conserved	N/A
2	LmjF.27.1275	0.15634	2.22481e-26	1.81923e-22	0.107	0.055	hypothetical protein, conserved	N/A
2	LmjF.16.1650	0.155771	5.62044e-24	4.59583e-20	0.152	0.09	Clustered mitochondria, putative	N/A
2	LmjF.12.0100	0.155298	2.54041e-24	2.0773e-20	0.188	0.117	Plus-3 domain/Zinc finger, C3HC4 type (RING finger), putative	DNA binding
2	LmjF.10.0120	0.155164	1.04691e-19	8.56057e-16	0.148	0.092	PSP1 C-terminal conserved region, putative	N/A
2	LmjF.02.0500	0.155108	1.50769e-27	1.23284e-23	0.136	0.075	glycerate kinase, putative	glycerate kinase activity
2	LmjF.18.1440	0.154633	2.0524e-26	1.67825e-22	0.295	0.194	EF-hand domain pair, putative	calcium ion binding
2	LmjF.21.1565	0.154371	2.37973e-28	1.9459e-24	0.171	0.1	NIMA-related kinase, putative	ATP binding;protein kinase activity
2	LmjF.17.1110	0.154108	4.73429e-24	3.87123e-20	0.122	0.068	kinesin, putative	ATP binding;microtubule binding;microtubule motor activity;protein binding
2	LmjF.23.0180	0.153645	1.17157e-29	9.57992e-26	0.118	0.061	hypothetical protein, conserved	N/A
2	LmjF.21.1850	0.153642	7.29827e-27	5.9678e-23	0.121	0.065	hypothetical protein, conserved	N/A
2	LmjF.03.0370	0.153433	2.34533e-26	1.91778e-22	0.141	0.079	GPR1/FUN34/yaaH family, putative	N/A
2	LmjF.15.1270	0.152763	7.93065e-26	6.48489e-22	0.19	0.116	hypothetical protein, conserved	N/A
2	LmjF.31.2990	0.15255	3.86721e-29	3.16222e-25	0.193	0.114	hypothetical protein, conserved	N/A
2	LmjF.31.1040	0.152361	2.13196e-28	1.74331e-24	0.159	0.09	RNA recognition motif. (a.k.a. RRM, RBD, or RNP domain), putative	nucleic acid binding
2	LmjF.22.1210	0.151966	2.68085e-21	2.19213e-17	0.15	0.092	WD domain, G-beta repeat, putative	protein binding
2	LmjF.22.1410	0.151848	2.13083e-31	1.74238e-27	0.2	0.116	centrin-4, putative	calcium ion binding
2	LmjF.04.0470	0.151829	1.24268e-13	1.01614e-09	0.457	0.358	60S ribosomal protein L11 (L5, L16)	structural constituent of ribosome
2	LmjF.27.0810	0.15157	1.05649e-26	8.63891e-23	0.117	0.062	glutaredoxin-like protein	electron transfer activity;protein disulfide oxidoreductase activity
2	LmjF.10.0390	0.151352	1.28603e-29	1.05158e-25	0.143	0.078	folate/biopterin transporter, putative	N/A
2	LmjF.33.3270	0.151322	1.49482e-32	1.22232e-28	0.204	0.119	delta-12 fatty acid desaturase	N/A
2	LmjF.10.0680	0.151309	1.19462e-25	9.76841e-22	0.103	0.053	hypothetical protein, unknown function	N/A
2	LmjF.24.0880	0.151105	1.60813e-26	1.31497e-22	0.182	0.109	hypothetical predicted transmembrane protein	N/A
2	LmjF.35.3570	0.151077	7.97869e-28	6.52418e-24	0.236	0.148	Fusaric acid resistance protein-like, putative	N/A
2	LmjF.32.1270	0.150704	8.98219e-21	7.34474e-17	0.104	0.058	CRAL/TRIO domain containing protein, putative	N/A
2	LmjF.07.0025	0.150666	1.6774e-22	1.37161e-18	0.477	0.35	histone-lysine N-methyltransferase, putative	histone methyltransferase activity (H3-K79 specific);histone-lysine N-methyltransferase activity
2	LmjF.30.2780	0.150344	1.323e-23	1.08182e-19	0.133	0.076	Zinc finger C-x8-C-x5-C-x3-H type (and similar), putative	metal ion binding
2	LmjF.17.0940	0.150335	2.05617e-24	1.68133e-20	0.115	0.063	Phosphorylated CTD interacting factor 1 WW domain containing protein, putative	RNA polymerase II C-terminal domain binding;mRNA (2'-O-methyladenosine-N6-)-methyltransferase activity
2	LmjF.35.1860	0.150286	1.04076e-26	8.51033e-23	0.143	0.081	CMGC/DYRK protein kinase, putative	ATP binding;protein kinase activity
2	LmjF.12.0180	0.150225	3.56205e-24	2.91269e-20	0.163	0.098	hypothetical protein, conserved	N/A
2	LmjF.09.0040	0.150018	1.51051e-21	1.23514e-17	0.114	0.065	N-acetyl-D-acetylglucosaminylphosphatidylinositol deacetylase	N-acetylglucosaminylphosphatidylinositol deacetylase activity
2	LmjF.09.1390	0.149993	1.57595e-23	1.28865e-19	0.126	0.071	hypothetical protein, conserved	N/A
2	LmjF.21.1150	0.149967	1.73475e-19	1.41851e-15	0.133	0.081	hypothetical protein, conserved	N/A
2	LmjF.35.1390	0.149767	4.14257e-28	3.38738e-24	0.354	0.236	Zn-finger in Ran binding protein and others/OTU-like cysteine protease, putative	N/A
2	LmjF.32.2150	0.149586	8.34859e-27	6.82664e-23	0.308	0.205	hypothetical protein, conserved	N/A
2	LmjF.36.2860	0.14931	1.30428e-21	1.06651e-17	0.302	0.209	40S ribosomal protein S24e	structural constituent of ribosome
2	LmjF.04.0350	0.149262	1.30806e-23	1.0696e-19	0.146	0.086	hypothetical protein, conserved	N/A
2	LmjF.14.0310	0.149057	2.60979e-19	2.13402e-15	0.522	0.393	proteasome alpha 3 subunit, putative	N/A
2	LmjF.17.0850	0.148924	1.79561e-28	1.46827e-24	0.176	0.102	hypothetical protein, conserved	N/A
2	LmjF.34.0060	0.148793	4.34101e-22	3.54964e-18	0.189	0.12	hypothetical protein, conserved	N/A
2	LmjF.12.1260	0.148727	7.99841e-27	6.5403e-23	0.322	0.215	hypothetical protein, conserved	N/A
2	LmjF.36.3550	0.148629	1.38872e-22	1.13555e-18	0.146	0.087	hypothetical protein, conserved	N/A
2	LmjF.18.0620	0.148605	2.78526e-15	2.27751e-11	0.743	0.626	60S ribosomal protein L10a, putative	RNA binding;structural constituent of ribosome
2	LmjF.28.2050	0.148558	7.06388e-23	5.77614e-19	0.136	0.08	AMP-binding enzyme/Ankyrin repeats (3 copies), putative	protein binding
2	LmjF.08.0580	0.148452	1.4614e-22	1.19499e-18	0.116	0.065	hypothetical protein, unknown function	N/A
2	LmjF.35.2180	0.148387	2.04878e-20	1.67529e-16	0.139	0.085	hypothetical protein, conserved	N/A
2	LmjF.04.0760	0.148184	9.12996e-18	7.46557e-14	0.65	0.519	nascent polypeptide associated complex subunit- like protein, copy 2	N/A
2	LmjF.35.5080	0.148035	9.74727e-24	7.97034e-20	0.218	0.14	hypothetical protein, conserved	N/A
2	LmjF.29.1340	0.148018	5.16858e-31	4.22635e-27	0.208	0.123	RNA-binding protein, putative	nucleic acid binding
2	LmjF.10.0050	0.147786	4.10884e-25	3.35979e-21	0.176	0.107	Dos2-interacting transcription regulator of RNA-Pol-II, putative	N/A
2	LmjF.35.2730	0.147715	4.17517e-21	3.41404e-17	0.147	0.09	acyl-CoA dehydrogenase, putative	acyl-CoA dehydrogenase activity;flavin adenine dinucleotide binding;oxidoreductase activity, acting on the CH-CH group of donors
2	LmjF.30.2190	0.147416	8.74126e-25	7.14773e-21	0.183	0.112	RNA-binding protein, putative	nucleic acid binding
2	LmjF.21.0125	0.147299	3.08158e-19	2.51981e-15	0.139	0.086	DNA topoisomerase 1A	DNA binding;DNA topoisomerase activity;DNA topoisomerase type I (single strand cut, ATP-independent) activity
2	LmjF.12.1220	0.147079	2.49241e-24	2.03804e-20	0.163	0.097	WD repeat and HMG-box DNA-binding protein, putative	protein binding
2	LmjF.06.0320	0.146577	3.19108e-29	2.60935e-25	0.152	0.084	hypothetical protein, conserved	N/A
2	LmjF.04.0320	0.146481	5.56192e-26	4.54798e-22	0.361	0.247	beta-fructofuranosidase, putative	hydrolase activity, hydrolyzing O-glycosyl compounds
2	LmjF.01.0220	0.146301	2.44772e-26	2.0015e-22	0.228	0.144	cyclophilin 12, putative	peptidyl-prolyl cis-trans isomerase activity
2	LmjF.35.1730	0.146046	4.84056e-29	3.95812e-25	0.224	0.137	casein kinase II, putative	ATP binding;protein kinase activity
2	LmjF.16.0730	0.145839	3.86531e-18	3.16066e-14	0.174	0.114	ubiquitin hydrolase, putative	thiol-dependent ubiquitin-specific protease activity
2	LmjF.32.0700	0.145713	2.86667e-26	2.34407e-22	0.385	0.263	ubiquitin-conjugating enzyme E2, putative	N/A
2	LmjF.16.1350	0.145545	1.11438e-24	9.11228e-21	0.142	0.082	DNA-directed rna polymerase I largest subunit, putative	DNA binding;DNA-directed 5'-3' RNA polymerase activity;zinc ion binding
2	LmjF.29.2490	0.145241	9.67455e-22	7.91088e-18	0.108	0.06	protein kinase, putative	ATP binding;protein kinase activity
2	LmjF.30.3300	0.145094	6.57487e-32	5.37627e-28	0.268	0.166	UV excision repair RAD23-like protein	damaged DNA binding;protein binding
2	LmjF.36.2570	0.144986	2.30043e-22	1.88106e-18	0.129	0.075	membrane-bound acid phosphatase precursor	N/A
2	LmjF.14.0120	0.144973	1.23582e-20	1.01053e-16	0.124	0.073	hypothetical protein, conserved	N/A
2	LmjF.29.1790	0.144913	3.17116e-21	2.59306e-17	0.181	0.115	hypothetical protein, conserved	N/A
2	LmjF.33.0670	0.144855	2.43188e-22	1.98855e-18	0.146	0.087	protein phosphatase 2A regulatory subunit, putative	protein binding;protein phosphatase regulator activity
2	LmjF.34.1110	0.144789	4.40284e-23	3.6002e-19	0.157	0.095	Shwachman-Bodian-Diamond syndrome (SBDS) protein/SBDS protein C-terminal domain containing protein, putative	N/A
2	LmjF.25.2110	0.14462	3.762e-24	3.07618e-20	0.123	0.069	KIF-1 binding protein C terminal, putative	N/A
2	LmjF.10.0740	0.144619	6.83222e-24	5.58671e-20	0.194	0.121	hypothetical protein, conserved	N/A
2	LmjF.36.5390	0.144572	3.9619e-26	3.23964e-22	0.167	0.099	phosphoribosylpyrophosphate synthetase, putative	magnesium ion binding;ribose phosphate diphosphokinase activity
2	LmjF.30.2050	0.144502	4.33119e-26	3.54162e-22	0.124	0.067	ferric reductase transmembrane protein-like protein	N/A
2	LmjF.26.0480	0.14448	5.10703e-22	4.17602e-18	0.14	0.083	Conserved hypothetical ATP binding protein, putative	N/A
2	LmjF.28.1060	0.144286	7.26029e-21	5.93674e-17	0.513	0.381	hypothetical protein, conserved	N/A
2	LmjF.36.6290	0.144273	6.34833e-28	5.19103e-24	0.473	0.329	glucose transporter 2	transmembrane transporter activity
2	LmjF.28.1090	0.144153	3.38425e-22	2.7673e-18	0.354	0.249	ATP-grasp domain containing protein, putative	ATP binding;metal ion binding
2	LmjF.17.0740	0.144058	2.83892e-22	2.32138e-18	0.206	0.132	hypothetical protein, conserved	N/A
2	LmjF.12.0360	0.144001	5.92773e-26	4.84711e-22	0.207	0.128	Glutathione S-transferase, N-terminal domain containing protein, putative	protein binding
2	LmjF.13.1560	0.143911	8.30875e-29	6.79407e-25	0.3	0.194	ras-like small GTPases, putative	GTP binding
2	LmjF.23.0610	0.143501	1.00346e-22	8.20529e-19	0.121	0.068	hypothetical protein, conserved	N/A
2	LmjF.26.2440	0.143455	1.20911e-19	9.88693e-16	0.124	0.074	Aurora kinase 3, putative	ATP binding;protein kinase activity
2	LmjF.29.2650	0.143276	2.13265e-19	1.74387e-15	0.155	0.097	Nuclear condensing complex subunits, C-term domain containing protein, putative	N/A
2	LmjF.07.0510	0.143008	1.23761e-06	0.01012	0.67	0.581	60S ribosomal protein L7a, putative	N/A
2	LmjF.31.1480	0.142815	8.89332e-26	7.27207e-22	0.245	0.157	hypothetical protein, unknown function	N/A
2	LmjF.05.0090	0.142764	5.36328e-22	4.38555e-18	0.131	0.077	Nudix hydrolase 2, putative	hydrolase activity
2	LmjF.14.0170	0.142715	3.738e-23	3.05656e-19	0.11	0.06	hypothetical protein, conserved	N/A
2	LmjF.31.3160	0.142355	3.01301e-23	2.46374e-19	0.169	0.103	serine/threonine-protein kinase NRKB, putative	ATP binding;protein kinase activity
2	LmjF.31.1730	0.142144	6.73864e-33	5.51019e-29	0.339	0.216	hypothetical protein, conserved	N/A
2	LmjF.31.0530	0.142055	9.73377e-26	7.9593e-22	0.306	0.205	hypothetical protein, unknown function	N/A
2	LmjF.27.1900	0.141853	3.0694e-24	2.50985e-20	0.179	0.11	Eukaryotic protein of unknown function (DUF846), putative	N/A
2	LmjF.35.2150	0.141767	9.18894e-29	7.5138e-25	0.198	0.118	short chain dehydrogenase, putative	N/A
2	LmjF.32.2590	0.141344	1.34323e-23	1.09836e-19	0.102	0.054	hypothetical protein, conserved	N/A
2	LmjF.26.2350	0.140997	5.15764e-21	4.2174e-17	0.112	0.063	hypothetical protein, conserved	N/A
2	LmjF.28.1405	0.140982	5.09131e-25	4.16317e-21	0.223	0.142	hypothetical protein	metal ion binding
2	LmjF.22.0960	0.140792	2.02143e-23	1.65292e-19	0.139	0.081	kinesin, putative	ATP binding;microtubule binding;microtubule motor activity
2	LmjF.04.0620	0.140752	5.88598e-24	4.81296e-20	0.178	0.109	hypothetical protein	N/A
2	LmjF.22.1290	0.140278	1.17532e-24	9.61058e-21	0.182	0.111	ribonucleoside-diphosphate reductase small chain, putative	oxidoreductase activity
2	LmjF.05.0610	0.139908	2.10201e-23	1.71882e-19	0.152	0.091	Surp module, putative	RNA binding
2	LmjF.29.1960	0.139689	1.05364e-24	8.61559e-21	0.247	0.16	Fumarate hydratase class I, cytosolic	fumarate hydratase activity;hydro-lyase activity;lyase activity
2	LmjF.33.1240	0.139371	3.15172e-21	2.57716e-17	0.145	0.088	hypothetical protein, conserved	protein binding
2	LmjF.24.1750	0.139239	3.67484e-28	3.00492e-24	0.158	0.09	SET domain containing protein, putative	protein binding
2	LmjF.31.0250	0.13908	3.70782e-21	3.03188e-17	0.303	0.209	ATP-dependent RNA helicase, putative	ATP binding;nucleic acid binding
2	LmjF.34.0320	0.138963	2.46461e-21	2.01531e-17	0.221	0.145	hypothetical protein, conserved	N/A
2	LmjF.26.2480	0.138956	1.59235e-22	1.30206e-18	0.157	0.095	CDP-diacylglycerol--inositol 3-phosphatidyltransferase, putative	phosphotransferase activity, for other substituted phosphate groups
2	LmjF.25.1250	0.138828	2.8531e-17	2.33298e-13	0.125	0.077	hypothetical protein, conserved	N/A
2	LmjF.25.0680	0.138817	8.48835e-26	6.94092e-22	0.151	0.087	myosin heavy chain kinase c-like protein	ATP binding;protein serine/threonine kinase activity
2	LmjF.29.1060	0.138412	3.70823e-20	3.03222e-16	0.178	0.115	hypothetical protein, conserved	N/A
2	LmjF.08.0640	0.138181	5.08414e-24	4.1573e-20	0.147	0.086	Amastin surface glycoprotein, putative	N/A
2	LmjF.24.0040	0.138141	6.22826e-21	5.09285e-17	0.197	0.127	60S ribosomal protein L17, putative	structural constituent of ribosome
2	LmjF.13.0580	0.138056	2.10283e-24	1.71949e-20	0.24	0.156	hypothetical protein, conserved	protein binding
2	LmjF.36.6800	0.138053	2.5643e-19	2.09682e-15	0.141	0.087	CG1104 protein-like protein	N/A
2	LmjF.01.0420	0.13801	2.88918e-17	2.36248e-13	0.386	0.285	ribosomal protein S7, putative	structural constituent of ribosome
2	LmjF.20.0110	0.137681	1.56947e-22	1.28336e-18	0.209	0.135	phosphoglycerate kinase B, cytosolic	phosphoglycerate kinase activity
2	LmjF.29.0867	0.137603	9.16407e-20	7.49346e-16	0.119	0.07	guanine deaminase, putative	guanine deaminase activity;hydrolase activity;hydrolase activity, acting on carbon-nitrogen (but not peptide) bonds;zinc ion binding
2	LmjF.01.0660	0.137265	3.72548e-22	3.04633e-18	0.137	0.081	hypothetical protein, conserved	N/A
2	LmjF.36.2980	0.137152	4.17889e-23	3.41708e-19	0.216	0.139	bromodomain factor 2 protein, putative	protein binding
2	LmjF.31.1150	0.136876	6.72515e-22	5.49915e-18	0.204	0.132	hypothetical protein, conserved	N/A
2	LmjF.01.0250	0.136763	1.21064e-19	9.89941e-16	0.125	0.075	Right handed beta helix region, putative	N/A
2	LmjF.01.0010	0.136682	4.36791e-21	3.57164e-17	0.225	0.149	Protein of unknown function (DUF2946), putative	N/A
2	LmjF.20.0600	0.136614	1.42208e-17	1.16283e-13	0.124	0.077	hypothetical protein, conserved	N/A
2	LmjF.35.0320	0.136271	3.46005e-25	2.82928e-21	0.234	0.149	serine palmitoyltransferase, putative	catalytic activity;pyridoxal phosphate binding;transferase activity
2	LmjF.24.1040	0.135668	4.10885e-22	3.3598e-18	0.154	0.093	hypothetical protein, unknown function	metal ion binding
2	LmjF.35.1310	0.135643	7.13895e-27	5.83752e-23	0.317	0.21	histone H4	DNA binding;protein heterodimerization activity
2	LmjF.33.1780	0.135111	1.6509e-22	1.34994e-18	0.14	0.083	hypothetical protein, conserved	protein binding
2	LmjF.35.0940	0.134932	1.17289e-20	9.59073e-17	0.111	0.063	hypothetical protein, conserved	N/A
2	LmjF.34.2010	0.134901	2.0315e-22	1.66116e-18	0.129	0.074	hypothetical protein, conserved	N/A
2	LmjF.15.0790	0.134624	1.46776e-18	1.20019e-14	0.128	0.078	hypothetical protein, unknown function	N/A
2	LmjF.11.0170	0.13431	3.83857e-17	3.1388e-13	0.126	0.078	myotubularin-associated protein, putative	N/A
2	LmjF.30.0880	0.134191	2.93611e-25	2.40086e-21	0.268	0.174	adenosine kinase, putative	adenosine kinase activity
2	LmjF.32.1150	0.134165	3.99108e-25	3.26351e-21	0.183	0.111	hypothetical protein, conserved	N/A
2	LmjF.12.0230	0.133981	6.75182e-17	5.52096e-13	0.203	0.137	hypothetical protein, conserved	N/A
2	LmjF.30.2740	0.133963	6.92014e-23	5.6586e-19	0.344	0.237	small glutamine-rich tetratricopeptide repeat protein, putative	protein binding
2	LmjF.31.0560	0.13328	1.74544e-21	1.42725e-17	0.121	0.069	mevalonate kinase, putative	ATP binding;mevalonate kinase activity
2	LmjF.25.1000	0.133168	4.86293e-26	3.97641e-22	0.17	0.101	hypothetical protein, conserved	N/A
2	LmjF.36.0720	0.133091	3.47218e-28	2.8392e-24	0.186	0.11	mitogen-activated protein kinase 2	ATP binding;MAP kinase activity;protein kinase activity
2	LmjF.34.2479	0.132641	1.41667e-15	1.15841e-11	0.111	0.068	hypothetical protein, conserved	N/A
2	LmjF.35.1720	0.132291	5.07485e-27	4.1497e-23	0.186	0.111	cyclophilin 14, putative	peptidyl-prolyl cis-trans isomerase activity
2	LmjF.21.0440	0.132228	4.41096e-23	3.60684e-19	0.23	0.15	ubiquitin-conjugating enzyme-like protein	N/A
2	LmjF.26.1480	0.131912	3.15542e-18	2.58019e-14	0.144	0.091	hypothetical protein, conserved	N/A
2	LmjF.35.4000	0.131701	1.0344e-27	8.45831e-24	0.327	0.216	MAP kinase kinase-like protein	ATP binding;protein binding;protein kinase activity;ubiquitin-protein transferase activity
2	LmjF.04.0890	0.131308	3.78485e-25	3.09488e-21	0.235	0.15	hypothetical protein, conserved	protein binding
2	LmjF.35.1650	0.131209	1.79919e-16	1.4712e-12	0.111	0.067	hypothetical protein, conserved	N/A
2	LmjF.14.1230	0.130917	6.86518e-16	5.61366e-12	0.1	0.06	hypothetical protein, unknown function	N/A
2	LmjF.28.2200	0.130867	4.25845e-29	3.48214e-25	0.199	0.118	Mannosyl oligosaccharide glucosidase, putative	mannosyl-oligosaccharide glucosidase activity
2	LmjF.34.2540	0.13063	9.74518e-21	7.96864e-17	0.26	0.177	Coiled-coil and C2 domain-containing protein	N/A
2	LmjF.05.0770	0.130363	5.48227e-21	4.48285e-17	0.226	0.149	hypothetical protein, unknown function	N/A
2	LmjF.36.0350	0.130006	3.67528e-21	3.00528e-17	0.19	0.122	hypothetical protein, conserved	protein binding
2	LmjF.05.0470	0.129955	3.0932e-20	2.52931e-16	0.106	0.06	hypothetical protein, unknown function	N/A
2	LmjF.15.1380	0.129925	3.11638e-26	2.54826e-22	0.359	0.242	nucleolar RNA binding protein, putative	N/A
2	LmjF.17.0170	0.129896	6.42193e-25	5.25121e-21	0.235	0.15	WD domain, G-beta repeat, putative	protein binding
2	LmjF.05.0290	0.129617	2.17933e-25	1.78204e-21	0.252	0.162	phosphate carrier protein, mitochondrial precursor-like protein	N/A
2	LmjF.34.0640	0.12956	1.21836e-20	9.96254e-17	0.151	0.093	hypothetical protein, unknown function	N/A
2	LmjF.06.0480	0.129361	2.43028e-23	1.98724e-19	0.155	0.092	hypothetical protein, conserved	N/A
2	LmjF.32.1820	0.129063	2.87626e-24	2.35192e-20	0.31	0.209	iron superoxide dismutase, putative	metal ion binding;superoxide dismutase activity
2	LmjF.36.5990	0.128996	6.0767e-21	4.96892e-17	0.153	0.094	hook complex protein, conserved	N/A
2	LmjF.25.1800	0.128888	9.19051e-23	7.51508e-19	0.114	0.063	hypothetical protein, conserved	N/A
2	LmjF.01.0670	0.128879	1.13103e-21	9.24839e-18	0.334	0.232	hypothetical protein, conserved	N/A
2	LmjF.30.0770	0.128725	1.49174e-21	1.21979e-17	0.187	0.118	hypothetical protein, conserved	N/A
2	LmjF.15.1203	0.12861	6.87597e-22	5.62248e-18	0.167	0.103	60S acidic ribosomal protein P2	structural constituent of ribosome
2	LmjF.08.0620	0.128527	1.72497e-22	1.41051e-18	0.267	0.179	hypothetical protein, conserved	N/A
2	LmjF.12.0210	0.127969	7.42069e-26	6.0679e-22	0.182	0.109	proteasome regulatory ATPase subunittcc1l8.3, putative	ATP binding;ATPase activity;hydrolase activity;proteasome-activating ATPase activity
2	LmjF.09.0430	0.127803	5.04972e-18	4.12916e-14	0.117	0.07	Zinc finger, C3HC4 type (RING finger), putative	DNA binding
2	LmjF.09.0980	0.127783	5.49103e-23	4.49002e-19	0.305	0.208	hypothetical protein, conserved	N/A
2	LmjF.32.1580	0.127393	5.5806e-25	4.56326e-21	0.217	0.136	phosphomannose isomerase	mannose-6-phosphate isomerase activity;zinc ion binding
2	LmjF.14.0350	0.127083	3.36012e-20	2.74757e-16	0.121	0.071	threonine synthase, putative	N/A
2	LmjF.33.1050	0.126881	1.1552e-23	9.44605e-20	0.227	0.146	hypothetical protein, conserved	N/A
2	LmjF.30.0430	0.126766	4.97723e-21	4.06988e-17	0.111	0.063	quiescin sulfhydryl oxidase, putative	flavin-linked sulfhydryl oxidase activity;thiol oxidase activity
2	LmjF.35.1940	0.126414	1.98414e-20	1.62243e-16	0.119	0.069	hypothetical protein, unknown function	N/A
2	LmjF.29.0970	0.126179	1.53843e-15	1.25798e-11	0.141	0.092	kinesin, putative	ATP binding;microtubule binding;microtubule motor activity
2	LmjF.30.2730	0.126113	2.21527e-21	1.81143e-17	0.155	0.095	Stabilization of polarity axis, putative	N/A
2	LmjF.26.1060	0.126069	7.65846e-20	6.26232e-16	0.122	0.072	RNA recognition motif. (a.k.a. RRM, RBD, or RNP domain), putative	nucleic acid binding
2	LmjF.35.2560	0.125967	4.79048e-26	3.91718e-22	0.288	0.189	cytochrome P450 reductase, putative	FMN binding;oxidoreductase activity
2	LmjF.11.0940	0.125545	7.20677e-24	5.89298e-20	0.257	0.169	hypothetical protein, unknown function	N/A
2	LmjF.10.0520	0.125466	1.71387e-17	1.40143e-13	0.154	0.099	hypothetical protein, conserved	N/A
2	LmjF.20.1560	0.124812	1.29342e-27	1.05763e-23	0.131	0.071	amidohydrolase, putative	hydrolase activity
2	LmjF.29.2720	0.124803	5.56893e-19	4.55371e-15	0.125	0.075	Wee1-like protein kinase, putative	ATP binding;protein kinase activity
2	LmjF.28.0380	0.124375	1.68805e-19	1.38032e-15	0.133	0.08	saccharopine dehydrogenase, putative	oxidoreductase activity
2	LmjF.17.1190	0.124295	9.81638e-27	8.02685e-23	0.267	0.172	hypothetical protein, unknown function	N/A
2	LmjF.22.0520	0.124213	1.29981e-15	1.06285e-11	0.125	0.079	Rab-GTPase-TBC domain containing protein, putative	N/A
2	LmjF.31.0540	0.124057	1.65665e-25	1.35464e-21	0.221	0.139	glycosomal transporter (GAT1), putative	ATP binding;ATPase activity;ATPase-coupled transmembrane transporter activity
2	LmjF.31.1250	0.123438	1.7079e-22	1.39655e-18	0.265	0.178	hypothetical protein, conserved	N/A
2	LmjF.31.2460	0.123093	4.74335e-21	3.87863e-17	0.125	0.073	lipase, putative	N/A
2	LmjF.31.2190	0.122884	3.02334e-21	2.47218e-17	0.129	0.076	hypothetical protein, unknown function	N/A
2	LmjF.33.2860	0.122435	1.32009e-25	1.07944e-21	0.208	0.129	hypothetical protein, conserved	N/A
2	LmjF.03.0090	0.122429	1.7811e-20	1.4564e-16	0.106	0.059	DNA primase large subunit, putative	N/A
2	LmjF.29.1660	0.122347	1.03764e-27	8.48476e-24	0.21	0.128	hypothetical protein, conserved	N/A
2	LmjF.36.2040	0.122162	3.75836e-22	3.07321e-18	0.172	0.107	dolichyl-P-Man:GDP-Man5GlcNAc2-PP-dolichyl alpha-1,3-mannosyltransferase, putative	mannosyltransferase activity
2	LmjF.29.1010	0.122158	2.09874e-22	1.71614e-18	0.159	0.096	putative NAD(P)H quinone oxidoreductase, PIG3 family, putative	oxidoreductase activity
2	LmjF.35.2220	0.122044	3.9246e-18	3.20914e-14	0.245	0.169	kinetoplastid membrane protein-11	N/A
2	LmjF.10.1140	0.122005	1.83377e-19	1.49947e-15	0.133	0.08	Zinc finger, C3HC4 type (RING finger), putative	N/A
2	LmjF.31.0520	0.121986	2.61238e-17	2.13614e-13	0.109	0.065	CCCH zinc finger in TRM13 protein/U11-48K-like CHHC zinc finger/Methyltransferase TRM13, putative	methyltransferase activity;tRNA 2'-O-methyltransferase activity
2	LmjF.35.0280	0.12196	5.37122e-23	4.39204e-19	0.148	0.087	hypothetical protein, unknown function	N/A
2	LmjF.29.2300	0.121569	3.70569e-20	3.03014e-16	0.333	0.234	ubiquitin carboxyl-terminal hydrolase, putative	thiol-dependent ubiquitin-specific protease activity;zinc ion binding
2	LmjF.04.1080	0.121537	2.96452e-23	2.42409e-19	0.123	0.069	Transcriptional repressor TCF25, putative	N/A
2	LmjF.12.0405	0.12149	6.45668e-20	5.27963e-16	0.156	0.098	hypothetical protein	N/A
2	LmjF.21.0791	0.121151	2.69886e-25	2.20686e-21	0.155	0.09	putative PfkB family sugar kinase	N/A
2	LmjF.28.0720	0.121041	2.42822e-22	1.98555e-18	0.102	0.055	Sas10/Utp3/C1D family/Sas10 C-terminal domain containing protein, putative	N/A
2	LmjF.02.0610	0.120957	2.50054e-23	2.04469e-19	0.124	0.07	hypothetical protein, conserved	N/A
2	LmjF.35.4420	0.120831	5.22772e-21	4.27471e-17	0.14	0.084	mitochondrial phosphate transporter, putative	N/A
2	LmjF.32.0220	0.120575	6.85679e-22	5.6068e-18	0.195	0.125	hypothetical protein, conserved	N/A
2	LmjF.32.1040	0.120498	5.66182e-18	4.62967e-14	0.163	0.106	hypothetical protein, conserved	N/A
2	LmjF.21.0823	0.120487	2.14387e-24	1.75305e-20	0.268	0.176	protein kinase, putative	ATP binding;protein kinase activity
2	LmjF.33.2360	0.120433	5.39547e-18	4.41187e-14	0.143	0.09	ATP synthase regulation protein NCA2, putative	N/A
2	LmjF.16.1600	0.120261	2.01715e-24	1.64942e-20	0.157	0.092	eukaryotic translation initiation factor 4 gamma 3	RNA binding;protein binding
2	LmjF.18.0480	0.120217	6.21962e-18	5.08578e-14	0.17	0.11	uracil-DNA-glycosylase, putative	hydrolase activity, hydrolyzing N-glycosyl compounds;uracil DNA N-glycosylase activity
2	LmjF.14.0070	0.120078	5.80619e-20	4.74772e-16	0.136	0.083	DHHC palmitoyltransferase, putative	palmitoyltransferase activity
2	LmjF.19.0670	0.119675	8.66377e-18	7.08437e-14	0.108	0.064	U3 snoRNA-associated protein UTP11, putative	N/A
2	LmjF.36.5480	0.119666	5.54674e-24	4.53557e-20	0.257	0.168	hypothetical protein, conserved	N/A
2	LmjF.31.2230	0.11966	8.58319e-24	7.01847e-20	0.172	0.104	hypothetical protein, unknown function	N/A
2	LmjF.23.1370	0.119585	1.58877e-21	1.29914e-17	0.159	0.098	mitochondrial carrier protein-like protein	N/A
2	LmjF.36.3610	0.119561	2.86178e-19	2.34008e-15	0.125	0.075	hypothetical protein, unknown function	N/A
2	LmjF.07.0730	0.119529	1.17953e-17	9.64498e-14	0.128	0.079	malonyl-coa decarboxylase-like protein	malonyl-CoA decarboxylase activity
2	LmjF.36.6860	0.119267	9.78462e-19	8.00089e-15	0.144	0.09	calphotin-like protein	N/A
2	LmjF.32.3480	0.119165	1.13148e-18	9.25215e-15	0.129	0.079	hypothetical protein, conserved	protein binding
2	LmjF.30.3450	0.119056	1.3378e-20	1.09392e-16	0.178	0.112	hypothetical protein, conserved	protein binding
2	LmjF.12.1280	0.119016	9.59096e-19	7.84253e-15	0.131	0.08	hypothetical protein, unknown function	N/A
2	LmjF.28.2780	0.11881	2.4757e-07	0.00202438	0.855	0.787	heat-shock protein hsp70, putative	N/A
2	LmjF.36.3657	0.118798	4.2836e-20	3.5027e-16	0.197	0.128	Protein of unknown function (DUF1619), putative	N/A
2	LmjF.32.1010	0.118664	7.39908e-22	6.05023e-18	0.16	0.098	atypical dual specificity phosphatase, putative	N/A
2	LmjF.13.0400	0.118546	2.61043e-20	2.13455e-16	0.222	0.147	Sister chromatid cohesion C-terminus, putative	chromatin binding
2	LmjF.36.5380	0.118453	8.27476e-25	6.76627e-21	0.231	0.148	NADH dehydrogenase, putative	oxidoreductase activity
2	LmjF.36.3000	0.118403	9.00061e-21	7.3598e-17	0.119	0.069	ATP-dependent RNA helicase, putative	ATP binding;RNA binding;RNA helicase activity;nucleic acid binding
2	LmjF.17.1050	0.118111	2.2e-23	1.79894e-19	0.204	0.129	hydrolase-like protein	N/A
2	LmjF.27.2460	0.118091	4.94874e-22	4.04659e-18	0.114	0.064	calcium/calmodulin-dependent protein kinase, putative	ATP binding;protein kinase activity
2	LmjF.25.1560	0.117926	8.32365e-19	6.80625e-15	0.153	0.097	CMGC/CLK family protein kinase, putative	ATP binding;protein kinase activity
2	LmjF.10.0470	0.117861	1.77116e-20	1.44828e-16	0.164	0.103	GP63, leishmanolysin	metalloendopeptidase activity
2	LmjF.24.1260	0.117303	5.12634e-18	4.19181e-14	0.163	0.105	amastin-like surface protein-like protein	N/A
2	LmjF.15.0120	0.117294	8.07013e-20	6.59895e-16	0.118	0.069	mitochondrial carrier protein, putative	N/A
2	LmjF.34.3580	0.117272	9.11767e-21	7.45552e-17	0.147	0.09	hypothetical protein, conserved	N/A
2	LmjF.27.0460	0.116963	1.93911e-19	1.58561e-15	0.205	0.136	Vasohibin, putative	N/A
2	LmjF.25.0610	0.116949	8.83065e-23	7.22082e-19	0.258	0.171	Regulatory-associated protein of TOR1	N/A
2	LmjF.19.0370	0.116603	1.4056e-21	1.14936e-17	0.337	0.235	hypothetical protein, conserved	N/A
2	LmjF.31.0400	0.116519	5.55915e-22	4.54571e-18	0.244	0.162	calpain-like protein, putative	calcium-dependent cysteine-type endopeptidase activity
2	LmjF.29.0940	0.116352	3.15306e-22	2.57826e-18	0.18	0.113	5-histidylcysteine sulfoxide synthase, putative	N/A
2	LmjF.32.1750	0.116316	7.53089e-23	6.15801e-19	0.142	0.083	pumilio/PUF RNA binding protein 7, putative	RNA binding
2	LmjF.29.2660	0.116145	1.76447e-21	1.44281e-17	0.18	0.113	helicase, putative	ATP binding;DNA binding;DNA helicase activity;helicase activity;hydrolase activity, acting on acid anhydrides, in phosphorus-containing anhydrides;nucleic acid binding
2	LmjF.35.3650	0.116087	2.66533e-20	2.17944e-16	0.116	0.067	hypothetical protein, conserved	N/A
2	LmjF.35.3080	0.116068	2.85226e-19	2.33229e-15	0.154	0.097	glycerol kinase, glycosomal, putative	glycerol kinase activity;phosphotransferase activity, alcohol group as acceptor
2	LmjF.34.2473	0.115999	1.1274e-20	9.21878e-17	0.178	0.113	hypothetical protein, conserved	N/A
2	LmjF.36.4920	0.115836	7.43664e-22	6.08094e-18	0.167	0.103	hypothetical protein, conserved	protein binding
2	LmjF.35.4430	0.115781	7.34998e-17	6.01008e-13	0.517	0.394	mitochondrial phosphate transporter, putative	N/A
2	LmjF.36.3680	0.115637	3.32961e-23	2.72262e-19	0.166	0.101	mitogen activated kinase-like protein	ATP binding;protein kinase activity
2	LmjF.26.1015	0.115577	1.55322e-22	1.27007e-18	0.193	0.121	hypothetical protein	N/A
2	LmjF.25.1310	0.115523	4.67517e-17	3.82288e-13	0.163	0.106	hypothetical protein, conserved	N/A
2	LmjF.21.1380	0.115415	4.4173e-20	3.61203e-16	0.133	0.08	hypothetical protein, conserved	N/A
2	LmjF.30.1940	0.11541	9.81553e-22	8.02616e-18	0.364	0.256	succinyl-coa:3-ketoacid-coenzyme a transferase- like protein	CoA-transferase activity
2	LmjF.32.1510	0.115357	2.49877e-19	2.04325e-15	0.16	0.102	YqaJ-like viral recombinase domain containing protein, putative	N/A
2	LmjF.36.1540	0.115339	2.02034e-21	1.65203e-17	0.355	0.249	engulfment and cell motility domain 2, putative	GTPase activator activity
2	LmjF.28.0590	0.115195	3.76563e-21	3.07916e-17	0.172	0.108	hypothetical protein, unknown function	N/A
2	LmjF.01.0750	0.115108	1.59782e-16	1.30654e-12	0.146	0.095	CMGC family protein kinase, putative	ATP binding;protein kinase activity
2	LmjF.36.2035	0.114978	3.01609e-21	2.46625e-17	0.141	0.085	hypothetical protein, conserved	anaphase-promoting complex binding;protein binding;ubiquitin-protein transferase activator activity
2	LmjF.22.1230	0.114749	5.86436e-16	4.79529e-12	0.109	0.067	hypothetical protein, conserved	N/A
2	LmjF.16.0260	0.114748	8.93442e-23	7.30568e-19	0.143	0.084	Ankyrin repeats (many copies)/Alpha/beta hydrolase family, putative	protein binding
2	LmjF.36.6950	0.114339	1.828e-23	1.49475e-19	0.143	0.084	delta-6 fatty acid desaturase	oxidoreductase activity
2	LmjF.20.1690	0.114194	3.54257e-21	2.89676e-17	0.183	0.116	SNAP protein, putative	protein binding
2	LmjF.33.1330	0.114187	3.80229e-16	3.10914e-12	0.109	0.066	glutamine aminotransferase, putative	catalytic activity;pyridoxal phosphate binding
2	LmjF.35.2840	0.114101	1.39559e-22	1.14118e-18	0.123	0.07	aminotransferase, putative	catalytic activity;cysteine desulfurase activity;pyridoxal phosphate binding
2	LmjF.32.3030	0.113798	8.50998e-20	6.95861e-16	0.158	0.099	chaperone protein DnaJ, putative	N/A
2	LmjF.36.1840	0.113688	8.2471e-22	6.74366e-18	0.152	0.092	DEAD box RNA helicase, putative	ATP binding;helicase activity;nucleic acid binding
2	LmjF.24.0680	0.113611	4.20296e-16	3.43676e-12	0.946	0.909	myo-inositol/proton symporter (MIT)	transmembrane transporter activity
2	LmjF.04.0570	0.1136	3.21174e-20	2.62624e-16	0.203	0.133	DENN (AEX-3) domain containing protein, putative	N/A
2	LmjF.34.2970	0.113422	8.30707e-16	6.79269e-12	0.108	0.066	Nucleus and spindle associated protein 4, putative	N/A
2	LmjF.11.0650	0.11338	2.15941e-22	1.76575e-18	0.21	0.135	Protein Associated with Differentiation, putative	transmembrane transporter activity
2	LmjF.10.0110	0.113076	4.22066e-19	3.45124e-15	0.157	0.099	WD-repeat containing protein	protein binding
2	LmjF.28.1050	0.113041	1.41737e-22	1.15898e-18	0.239	0.157	hypothetical protein, conserved	N/A
2	LmjF.30.1090	0.112664	4.60741e-22	3.76748e-18	0.339	0.235	WW domain containing protein, putative	protein binding
2	LmjF.36.1210	0.112657	1.89104e-18	1.54631e-14	0.113	0.066	hypothetical protein, conserved	N/A
2	LmjF.31.0550	0.112571	2.15389e-19	1.76124e-15	0.227	0.152	hypothetical protein, conserved	N/A
2	LmjF.11.0880	0.112265	4.93689e-18	4.0369e-14	0.15	0.095	START domain containing protein, putative	lipid binding
2	LmjF.15.0880	0.11188	1.14068e-14	9.32734e-11	0.102	0.063	myo-inositol-1 phosphatase, putative	N/A
2	LmjF.19.0270	0.111842	4.52519e-22	3.70025e-18	0.282	0.191	hypothetical protein, conserved	N/A
2	LmjF.29.2400	0.111822	1.39644e-22	1.14187e-18	0.162	0.098	NLI interacting factor-like phosphatase, putative	N/A
2	LmjF.13.0080	0.11182	3.36597e-23	2.75235e-19	0.281	0.187	mitochondrial DNA polymerase I protein B, putative	DNA binding;DNA-directed DNA polymerase activity;nucleic acid binding
2	LmjF.27.2330	0.111718	1.0522e-22	8.60381e-19	0.17	0.104	GTP binding protein, putative	GTP binding
2	LmjF.36.6140	0.111485	6.91319e-14	5.65291e-10	0.109	0.07	hypothetical protein, conserved	N/A
2	LmjF.06.0330	0.111412	1.32097e-21	1.08015e-17	0.174	0.109	hypothetical protein, conserved	protein binding
2	LmjF.24.0350	0.11131	8.28187e-20	6.77208e-16	0.114	0.066	hypothetical protein, conserved	N/A
2	LmjF.21.0320	0.11117	3.42589e-17	2.80135e-13	0.146	0.093	U1 small nuclear ribonucleoprotein C, putative	nucleic acid binding;zinc ion binding
2	LmjF.33.1370	0.111161	2.71533e-19	2.22033e-15	0.168	0.107	hypothetical protein, conserved	N/A
2	LmjF.34.3410	0.111144	8.61266e-26	7.04257e-22	0.169	0.1	hypothetical protein, unknown function	N/A
2	LmjF.15.1190	0.111049	6.11698e-19	5.00185e-15	0.237	0.161	cyclic nucleotide-binding domain containing protein, putative	scavenger receptor activity
2	LmjF.16.0190	0.110874	3.9117e-19	3.1986e-15	0.107	0.062	Las1-like, putative	endonuclease activity
2	LmjF.21.0835	0.110469	8.87035e-22	7.25329e-18	0.239	0.158	hypothetical protein, conserved	N/A
2	LmjF.25.2080	0.110433	5.83782e-22	4.77358e-18	0.144	0.086	elongation factor 2-like protein	GTP binding;GTPase activity
2	LmjF.27.1760	0.110171	1.1331e-17	9.26539e-14	0.186	0.124	Tubulin cofactor C domain-containing protein 1, putative	N/A
2	LmjF.34.0120	0.110101	4.47089e-20	3.65585e-16	0.123	0.072	adenylate kinase 2	ATP binding;adenylate kinase activity;nucleobase-containing compound kinase activity
2	LmjF.27.0750	0.109766	5.3933e-23	4.4101e-19	0.262	0.173	Stress responsive A/B Barrel Domain, putative	N/A
2	LmjF.35.0830	0.109676	4.19704e-20	3.43192e-16	0.203	0.133	NADH-dependent fumarate reductase-like protein	oxidoreductase activity;succinate dehydrogenase activity
2	LmjF.22.1020	0.109575	6.90473e-21	5.646e-17	0.126	0.073	hypothetical protein, unknown function	N/A
2	LmjF.32.3000	0.109272	2.27427e-14	1.85967e-10	0.101	0.063	Domain of unknown function DUF21, putative	N/A
2	LmjF.36.6370	0.109211	1.57331e-23	1.2865e-19	0.228	0.147	GTPase activating protein, putative	N/A
2	LmjF.24.0850	0.108881	2.03935e-17	1.66757e-13	0.529	0.399	triosephosphate isomerase	catalytic activity;triose-phosphate isomerase activity
2	LmjF.18.0670	0.108817	3.5136e-19	2.87307e-15	0.131	0.079	citrate synthase, putative	transferase activity, transferring acyl groups, acyl groups converted into alkyl on transfer
2	LmjF.35.0900	0.108589	4.28982e-24	3.50779e-20	0.175	0.106	hypothetical protein, conserved	N/A
2	LmjF.20.0100	0.108572	1.27819e-21	1.04517e-17	0.243	0.161	phosphoglycerate kinase C, glycosomal	phosphoglycerate kinase activity
2	LmjF.18.0630	0.108461	2.2347e-15	1.82731e-11	0.1	0.06	hypothetical protein, unknown function	N/A
2	LmjF.28.2190	0.108429	7.29874e-17	5.96818e-13	0.103	0.061	hypothetical protein, conserved	N/A
2	LmjF.31.2260	0.108427	7.39288e-22	6.04516e-18	0.146	0.087	aminopeptidase, putative	metallopeptidase activity;zinc ion binding
2	LmjF.15.0595	0.108343	2.48628e-19	2.03303e-15	0.136	0.083	hypothetical protein	N/A
2	LmjF.22.1580	0.108341	4.89159e-18	3.99986e-14	0.105	0.061	exosome complex exonuclease RRP45 homolog, putative	N/A
2	LmjF.02.0670	0.108319	1.87017e-17	1.52924e-13	0.112	0.067	mitochondrial carrier protein, putative	N/A
2	LmjF.10.0430	0.108294	7.58462e-21	6.20195e-17	0.107	0.06	Zinc finger, C3HC4 type (RING finger), putative	N/A
2	LmjF.27.0090	0.108035	1.20434e-21	9.84787e-18	0.136	0.08	cytochrome p450-like protein	heme binding;iron ion binding;monooxygenase activity;oxidoreductase activity, acting on paired donors, with incorporation or reduction of molecular oxygen
2	LmjF.29.1370	0.107975	1.94073e-20	1.58694e-16	0.297	0.206	RNA binding protein, putative	nucleic acid binding
2	LmjF.07.0960	0.107919	9.84589e-18	8.05098e-14	0.12	0.073	hypothetical protein, conserved	N/A
2	LmjF.34.2765	0.107822	1.03779e-19	8.48599e-16	0.251	0.17	hypothetical protein, conserved	N/A
2	LmjF.34.0250	0.107335	8.65268e-13	7.0753e-09	0.455	0.359	hypothetical protein, conserved	N/A
2	LmjF.22.1170	0.107318	8.32976e-22	6.81124e-18	0.176	0.11	Protein kinase domain containing protein, putative	ATP binding;protein kinase activity
2	LmjF.34.3952	0.107282	6.0023e-21	4.90808e-17	0.158	0.097	hypothetical protein	N/A
2	LmjF.08.0090	0.107266	1.13029e-18	9.24241e-15	0.151	0.095	adaptor complex protein (AP) 3 delta subunit 1, putative	N/A
2	LmjF.27.1860	0.107161	3.82351e-14	3.12648e-10	0.151	0.102	hypothetical protein, unknown function	N/A
2	LmjF.28.0090	0.107139	1.2262e-23	1.00267e-19	0.17	0.103	oxygen-sensing adenylate cyclase	heme binding;oxygen binding
2	LmjF.36.4660	0.107049	3.06663e-17	2.50759e-13	0.108	0.065	Vacuolar sorting protein 9 (VPS9) domain containing protein, putative	N/A
2	LmjF.18.0090	0.106938	5.01638e-17	4.10189e-13	0.103	0.061	alpha glucosidase II subunit, putative	carbohydrate binding;catalytic activity;hydrolase activity, hydrolyzing O-glycosyl compounds
2	LmjF.05.0630	0.106783	1.54588e-20	1.26407e-16	0.222	0.146	kinesin, putative	ATP binding;microtubule binding;microtubule motor activity
2	LmjF.11.0070	0.106716	4.34362e-18	3.55178e-14	0.167	0.108	GRIP domain containing protein, putative	N/A
2	LmjF.12.0190	0.106357	6.25053e-18	5.11106e-14	0.196	0.131	ubiquitin hydrolase, putative	thiol-dependent ubiquitin-specific protease activity
2	LmjF.25.2360	0.106082	5.54103e-19	4.5309e-15	0.121	0.072	Pumilio homology domain family member 8	RNA binding
2	LmjF.35.2270	0.106057	5.23557e-22	4.28113e-18	0.225	0.146	ATP-dependent RNA helicase-like protein	N/A
2	LmjF.16.0690	0.10586	7.93145e-19	6.48555e-15	0.138	0.085	eukaryotic translation initiation factor eIF2A, putative	translation initiation factor activity
2	LmjF.30.1800	0.105421	2.09908e-19	1.71642e-15	0.154	0.096	queuine tRNA-ribosyltransferase, putative	transferase activity, transferring pentosyl groups
2	LmjF.09.0520	0.10541	2.18792e-23	1.78906e-19	0.233	0.151	Flagellum attachment zone protein 3	N/A
2	LmjF.10.0990	0.105267	1.11096e-07	0.000908433	0.694	0.599	histone H3	DNA binding;protein heterodimerization activity
2	LmjF.35.3070	0.105109	1.39543e-23	1.14105e-19	0.199	0.125	hypothetical protein, conserved	N/A
2	LmjF.17.0733	0.10509	1.46635e-18	1.19903e-14	0.228	0.155	hypothetical protein, conserved	N/A
2	LmjF.28.0640	0.105027	5.55013e-20	4.53834e-16	0.196	0.127	ATP synthase subunit H, putative	proton transmembrane transporter activity
2	LmjF.30.1950	0.104934	1.22974e-15	1.00556e-11	0.196	0.135	hypothetical protein, unknown function	N/A
2	LmjF.18.1180	0.104923	3.70366e-20	3.02848e-16	0.195	0.126	hypothetical protein, conserved	N/A
2	LmjF.06.1240	0.104868	2.93782e-16	2.40226e-12	0.114	0.07	FAD binding domain containing protein, putative	FAD binding;oxidoreductase activity, acting on paired donors, with incorporation or reduction of molecular oxygen, NAD(P)H as one donor, and incorporation of one atom of oxygen
2	LmjF.27.0250	0.104607	2.19956e-16	1.79858e-12	0.211	0.145	flap endonuclease-1 (FEN-1), putative	DNA binding;catalytic activity;hydrolase activity, acting on ester bonds;nuclease activity
2	LmjF.21.1630	0.104598	1.17866e-17	9.63793e-14	0.146	0.092	calcineurin b subunit	calcium ion binding;calcium-dependent protein serine/threonine phosphatase regulator activity
2	LmjF.08.0100	0.104584	6.93132e-18	5.66774e-14	0.182	0.12	kinetoplastid-specific dual specificity phosphatase, putative	phosphatase activity;protein tyrosine phosphatase activity;protein tyrosine/serine/threonine phosphatase activity
2	LmjF.19.0240	0.104422	2.45858e-21	2.01038e-17	0.109	0.061	hypothetical protein, conserved	N/A
2	LmjF.14.0590	0.104385	2.48935e-16	2.03554e-12	0.121	0.075	hypothetical protein, conserved	N/A
2	LmjF.26.1920	0.104219	1.12546e-16	9.20287e-13	0.136	0.086	TLC domain containing protein, putative	N/A
2	LmjF.16.1500	0.103703	1.64829e-17	1.34781e-13	0.111	0.067	hypothetical protein, conserved	N/A
2	LmjF.20.0240	0.102999	1.85779e-22	1.51911e-18	0.182	0.113	transmembrane protein, putative	N/A
2	LmjF.25.1950	0.102761	2.55914e-17	2.09261e-13	0.138	0.087	kinesin, putative	ATP binding;microtubule binding;microtubule motor activity
2	LmjF.24.1190	0.102741	1.04081e-18	8.5107e-15	0.134	0.082	Inhibitor of apoptosis-promoting Bax1, putative	N/A
2	LmjF.17.0480	0.102699	7.84795e-18	6.41727e-14	0.13	0.08	Phenazine biosynthesis-like protein, putative	catalytic activity
2	LmjF.04.0220	0.10234	1.99052e-20	1.62765e-16	0.232	0.154	hypothetical protein	N/A
2	LmjF.09.0350	0.102227	1.46067e-16	1.19439e-12	0.143	0.092	Ring finger domain containing protein, putative	N/A
2	LmjF.36.2820	0.102033	2.76876e-18	2.26402e-14	0.12	0.072	hypothetical protein, conserved	N/A
2	LmjF.28.1190	0.102007	4.60173e-18	3.76284e-14	0.238	0.163	copine i-like protein	N/A
2	LmjF.17.1150	0.101813	4.85476e-16	3.96974e-12	0.222	0.154	5'-3' exoribonuclease B, putative	exonuclease activity;nucleic acid binding
2	LmjF.36.5180	0.101677	3.01471e-18	2.46513e-14	0.189	0.124	aldehyde dehydrogenase, putative	oxidoreductase activity;oxidoreductase activity, acting on the aldehyde or oxo group of donors, NAD or NADP as acceptor
2	LmjF.21.0270	0.101577	1.07868e-13	8.82035e-10	0.115	0.074	STE group serine/threonine-protein kinase, putative	ATP binding;protein kinase activity
2	LmjF.32.2870	0.101492	2.40338e-21	1.96525e-17	0.148	0.089	phosphatidate cytidylyltransferase-like protein	transferase activity, transferring phosphorus-containing groups
2	LmjF.35.0490	0.10135	9.4102e-21	7.69472e-17	0.33	0.231	CAMK/CAMKL family protein kinase, putative	ATP binding;calcium ion binding;protein kinase activity
2	LmjF.31.0320	0.101313	1.06326e-11	8.69426e-08	0.601	0.481	amino acid transporter, putative	N/A
2	LmjF.33.0870	0.101232	8.06072e-24	6.59125e-20	0.227	0.145	hypothetical protein, conserved	N/A
2	LmjF.28.2380	0.101017	4.48691e-17	3.66895e-13	0.148	0.094	subtilisin-like serine peptidase	N/A
2	LmjF.12.0030	0.100944	5.46379e-15	4.46774e-11	0.156	0.104	proteasome beta-1 subunit, putative	threonine-type endopeptidase activity
2	LmjF.09.1250	0.100851	6.55542e-23	5.36037e-19	0.252	0.165	hypothetical protein, conserved	N/A
2	LmjF.35.3090	0.100661	8.13611e-18	6.6529e-14	0.2	0.134	DnaJ domain containing protein, putative	N/A
2	LmjF.17.0910	0.100636	5.56277e-20	4.54868e-16	0.192	0.125	acyltransferase, putative	transferase activity, transferring acyl groups
2	LmjF.25.2290	0.100443	2.26775e-16	1.85434e-12	0.127	0.08	Pex2 / Pex12 amino terminal region/Ring finger domain containing protein, putative	N/A
3	LmjF.32.3320	1.36499	0	0	0.49	0.134	cyclin 6, putative	N/A
3	LmjF.16.1420	1.28201	0	0	0.569	0.201	hypothetical protein, conserved	N/A
3	LmjF.35.0230	1.21686	0	0	0.444	0.137	hypothetical protein, conserved	metal ion binding
3	LmjF.09.0880	1.20966	0	0	0.516	0.178	histone h1-like protein	N/A
3	LmjF.36.0550	1.16578	0	0	0.386	0.106	cdc2-related kinase 3	ATP binding;protein kinase activity
3	LmjF.34.0250	1.00112	0	0	0.681	0.32	hypothetical protein, conserved	N/A
3	LmjF.29.2480	0.929986	5.00907e-249	4.09592e-245	0.415	0.15	hypothetical protein, conserved	N/A
3	LmjF.17.0500	0.909823	9.20904e-234	7.53023e-230	0.225	0.053	hypothetical protein	N/A
3	LmjF.26.2660	0.909603	4.8901e-204	3.99864e-200	0.328	0.114	Nucleoporin NUP92	N/A
3	LmjF.20.1365	0.901492	1.50386e-186	1.2297e-182	0.291	0.099	pumillio protein 9, putative	RNA binding
3	LmjF.07.0025	0.852721	1.09088e-211	8.92015e-208	0.623	0.326	histone-lysine N-methyltransferase, putative	histone methyltransferase activity (H3-K79 specific);histone-lysine N-methyltransferase activity
3	LmjF.16.1470	0.833997	2.08827e-193	1.70758e-189	0.482	0.221	kinesin, putative	ATP binding;microtubule binding;microtubule motor activity
3	LmjF.06.0830	0.822674	2.10485e-145	1.72114e-141	0.494	0.264	lipin, putative	N/A
3	LmjF.35.4125	0.811899	3.59454e-179	2.93926e-175	0.34	0.129	hypothetical protein, conserved	N/A
3	LmjF.32.2610	0.806867	1.40961e-206	1.15264e-202	0.618	0.316	Tip Of Extending FAZ protein 1	N/A
3	LmjF.27.1080	0.783349	1.29421e-216	1.05828e-212	0.629	0.321	hypothetical protein, conserved	protein binding
3	LmjF.28.1990	0.774826	7.57183e-164	6.19148e-160	0.29	0.105	hypothetical protein, conserved	protein binding
3	LmjF.21.1480	0.741044	9.72874e-167	7.95519e-163	0.515	0.255	hypothetical protein, conserved	N/A
3	LmjF.36.5150	0.723168	6.86858e-154	5.61644e-150	0.393	0.173	kinesin-D	ATP binding;microtubule binding;microtubule motor activity
3	LmjF.09.0400	0.712284	2.72836e-140	2.23098e-136	0.44	0.217	kinetoplastid kinetochore protein 10, putative	ATP binding;protein kinase activity
3	LmjF.26.1340	0.685203	6.07655e-194	4.9688e-190	0.693	0.383	DNA ligase k alpha, putative	ATP binding;DNA ligase (ATP) activity
3	LmjF.21.1220	0.666843	4.31728e-121	3.53024e-117	0.331	0.149	hypothetical protein, conserved	N/A
3	LmjF.23.0560	0.664043	7.60761e-138	6.22074e-134	0.467	0.236	kinesin-C	ATP binding;microtubule binding;microtubule motor activity
3	LmjF.20.0030	0.646495	6.40427e-113	5.23677e-109	0.336	0.157	Histone-lysine N-methyltransferase, H3 lysine-76 specific	histone methyltransferase activity (H3-K79 specific);histone-lysine N-methyltransferase activity
3	LmjF.09.1100	0.640107	6.18506e-119	5.05752e-115	0.327	0.147	hypothetical protein, conserved	N/A
3	LmjF.21.1350	0.618169	5.95137e-122	4.86643e-118	0.383	0.183	PB1 domain containing protein, putative	protein binding
3	LmjF.24.1720	0.611748	1.54725e-107	1.26518e-103	0.278	0.121	cell division cycle protein 20, putative	anaphase-promoting complex binding;protein binding;ubiquitin-protein transferase activator activity
3	LmjF.11.0720	0.606366	3.51471e-130	2.87398e-126	0.507	0.269	PUF nine target 1	N/A
3	LmjF.30.3310	0.567102	1.4526e-101	1.18779e-97	0.42	0.226	MORN repeat-containing protein 1	N/A
3	LmjF.30.1220	0.564964	7.52553e-89	6.15363e-85	0.181	0.07	hypothetical protein, unknown function	N/A
3	LmjF.09.0210	0.555729	2.11355e-126	1.72825e-122	0.579	0.318	Domain of unknown function (DUF4586), putative	N/A
3	LmjF.30.3330	0.552504	3.87401e-84	3.16778e-80	0.219	0.096	hypothetical protein, conserved	N/A
3	LmjF.27.0430	0.548657	9.34074e-76	7.63792e-72	0.282	0.143	hypothetical protein, conserved	N/A
3	LmjF.04.1120	0.547607	7.87963e-99	6.44317e-95	0.316	0.151	hypothetical protein, conserved	N/A
3	LmjF.10.0185	0.534921	2.7086e-112	2.21482e-108	0.56	0.321	hypothetical protein	N/A
3	LmjF.24.1400	0.524501	1.07516e-82	8.79161e-79	0.273	0.131	hypothetical protein, conserved	N/A
3	LmjF.36.4350	0.515752	2.758e-93	2.25522e-89	0.174	0.063	hypothetical protein, conserved	N/A
3	LmjF.10.0660	0.515752	2.67548e-89	2.18774e-85	0.364	0.191	hypothetical protein, unknown function	N/A
3	LmjF.29.1770	0.507115	1.73375e-124	1.41769e-120	0.708	0.444	paraflagellar rod protein 1D, putative	calmodulin binding
3	LmjF.36.0680	0.498352	3.73321e-73	3.05264e-69	0.245	0.119	hypothetical protein, conserved	N/A
3	LmjF.32.2190	0.496861	4.2172e-70	3.4484e-66	0.163	0.067	hypothetical protein, unknown function	N/A
3	LmjF.36.5970	0.495743	2.86754e-78	2.34479e-74	0.314	0.162	Flagellum attachment zone protein 5	N/A
3	LmjF.30.3700	0.486059	3.34632e-73	2.73628e-69	0.178	0.074	hypothetical protein, conserved	N/A
3	LmjF.35.4700	0.481312	1.6236e-69	1.32762e-65	0.214	0.1	Kinesin-13 6, putative	ATP binding;microtubule binding;microtubule motor activity
3	LmjF.04.0790	0.480468	3.82558e-71	3.12818e-67	0.208	0.094	hypothetical protein, conserved	N/A
3	LmjF.29.1040	0.479817	9.24027e-79	7.55577e-75	0.281	0.138	Flagellar Member 6	N/A
3	LmjF.18.1410	0.477567	3.64429e-70	2.97994e-66	0.285	0.148	hypothetical protein, conserved	N/A
3	LmjF.11.0810	0.471104	2.32824e-77	1.9038e-73	0.304	0.154	hypothetical protein, conserved	calcium ion binding
3	LmjF.36.3090	0.462779	9.35071e-80	7.64608e-76	0.496	0.296	hypothetical protein, conserved	N/A
3	LmjF.36.1900	0.462443	5.48221e-56	4.4828e-52	0.235	0.123	kinetoplastid kinetochore protein 1	N/A
3	LmjF.29.0270	0.456261	6.36318e-67	5.20317e-63	0.168	0.071	hypothetical protein, conserved	N/A
3	LmjF.32.0680	0.453934	2.25317e-71	1.84241e-67	0.384	0.221	OSM3-like kinesin, putative	ATP binding;microtubule binding;microtubule motor activity
3	LmjF.34.2540	0.45121	8.0528e-61	6.58478e-57	0.305	0.17	Coiled-coil and C2 domain-containing protein	N/A
3	LmjF.24.1980	0.442423	1.99166e-80	1.62858e-76	0.561	0.35	STOP axonemal protein, putative	N/A
3	LmjF.36.2120	0.432954	8.08992e-69	6.61513e-65	0.21	0.097	hypothetical protein, conserved	N/A
3	LmjF.35.4010	0.431176	3.43015e-72	2.80484e-68	0.499	0.31	cAMP-dependent protein kinase catalytic subunit 1	ATP binding;protein kinase activity;protein serine/threonine kinase activity
3	LmjF.36.2400	0.422385	1.96393e-61	1.6059e-57	0.305	0.169	hypothetical protein, conserved	calcium ion binding
3	LmjF.26.2250	0.422314	4.4907e-71	3.67205e-67	0.304	0.157	hypothetical protein, conserved	N/A
3	LmjF.09.0410	0.420573	2.80773e-60	2.29588e-56	0.22	0.108	kinetoplastid kinetochore protein 19, putative	ATP binding;protein kinase activity
3	LmjF.32.0360	0.414885	1.72792e-62	1.41292e-58	0.291	0.156	hypothetical protein, conserved	N/A
3	LmjF.31.3105	0.41158	1.24626e-62	1.01907e-58	0.275	0.145	autophagy protein 10	N/A
3	LmjF.10.0620	0.410437	2.02569e-64	1.6564e-60	0.363	0.209	FLA1-binding protein	N/A
3	LmjF.06.0430	0.40734	5.87632e-50	4.80506e-46	0.205	0.106	hypothetical protein, conserved	N/A
3	LmjF.26.1610	0.406875	2.8158e-77	2.30248e-73	0.732	0.526	Proline dehydrogenase, mitochondrial	calcium ion binding;proline dehydrogenase activity
3	LmjF.31.2320	0.406293	2.93411e-52	2.39922e-48	0.191	0.095	helicase-like protein	ATP binding
3	LmjF.07.0310	0.401588	5.00487e-69	4.09248e-65	0.354	0.196	paraflagellar rod protein, putative	calmodulin binding
3	LmjF.34.2970	0.398495	1.69826e-45	1.38867e-41	0.135	0.062	Nucleus and spindle associated protein 4, putative	N/A
3	LmjF.32.1130	0.39446	3.36541e-47	2.7519e-43	0.235	0.13	hypothetical protein, conserved	N/A
3	LmjF.31.2750	0.393915	8.53862e-44	6.98203e-40	0.198	0.106	kinetoplastid kinetochore protein 8, putative	N/A
3	LmjF.31.1680	0.392723	1.46216e-59	1.19561e-55	0.331	0.189	hypothetical protein, conserved	N/A
3	LmjF.33.0370	0.392448	3.51424e-61	2.87359e-57	0.237	0.119	WD domain, G-beta repeat, putative	anaphase-promoting complex binding;protein binding;ubiquitin-protein transferase activator activity
3	LmjF.32.1060	0.392401	1.1701e-62	9.56788e-59	0.39	0.229	Dynein intermediate chain, axonemal	protein binding
3	LmjF.25.1920	0.390744	1.90277e-62	1.55589e-58	0.381	0.223	hypothetical protein, conserved	protein binding
3	LmjF.15.0940	0.390334	1.53479e-54	1.255e-50	0.244	0.13	Nucleus and spindle associated protein 2, putative	N/A
3	LmjF.33.0610	0.389994	6.3122e-64	5.16149e-60	0.281	0.146	paraflagellar rod component, putative	N/A
3	LmjF.20.1110	0.389872	1.12507e-52	9.19967e-49	0.324	0.192	hypothetical protein, conserved	N/A
3	LmjF.29.2420	0.38963	4.20685e-49	3.43994e-45	0.202	0.104	hypothetical protein, conserved	N/A
3	LmjF.23.1025	0.389265	6.7068e-59	5.48415e-55	0.255	0.133	hypothetical protein, conserved	N/A
3	LmjF.01.0030	0.387892	1.20195e-43	9.82837e-40	0.23	0.13	Kinesin-13 1, putative	ATP binding;microtubule binding;microtubule motor activity
3	LmjF.33.2270	0.380324	2.00148e-60	1.63661e-56	0.462	0.289	hypothetical protein, conserved	N/A
3	LmjF.24.1950	0.377666	1.85526e-60	1.51705e-56	0.317	0.175	hypothetical protein, conserved	N/A
3	LmjF.28.1110	0.374481	6.12988e-50	5.0124e-46	0.259	0.144	WD domain, G-beta repeat, putative	protein binding
3	LmjF.09.0870	0.372656	4.307e-51	3.52183e-47	0.192	0.096	hypothetical protein, conserved	N/A
3	LmjF.31.2220	0.371736	2.8359e-35	2.31892e-31	0.199	0.116	hypothetical protein, unknown function	N/A
3	LmjF.36.5845	0.371661	1.56055e-42	1.27606e-38	0.152	0.074	kinetoplast-associated protein, putative	N/A
3	LmjF.07.0030	0.370879	3.52417e-47	2.88171e-43	0.281	0.164	hypothetical protein, conserved	N/A
3	LmjF.05.0370	0.370085	6.48083e-54	5.29938e-50	0.297	0.167	hypothetical protein, conserved	N/A
3	LmjF.25.2200	0.369066	2.37827e-50	1.94471e-46	0.259	0.144	parkin co-regulated protein, putative	N/A
3	LmjF.14.1220	0.365145	5.00178e-62	4.08996e-58	0.658	0.457	hypothetical protein, conserved	N/A
3	LmjF.34.3040	0.36488	1.96967e-49	1.6106e-45	0.387	0.241	hypothetical protein, conserved	N/A
3	LmjF.09.0560	0.359477	1.4021e-48	1.1465e-44	0.308	0.182	Histidine phosphatase superfamily (branch 1), putative	N/A
3	LmjF.19.0140	0.357701	3.06516e-55	2.50638e-51	0.32	0.182	Associated kinase of Tb14-3-3, putative	ATP binding;protein kinase activity
3	LmjF.21.0180	0.35385	5.59006e-55	4.57099e-51	0.44	0.272	CHAT domain containing protein, putative	protein binding
3	LmjF.21.1675	0.353143	1.37064e-42	1.12077e-38	0.161	0.081	hypothetical protein, conserved	N/A
3	LmjF.36.3550	0.352849	1.25535e-37	1.0265e-33	0.162	0.085	hypothetical protein, conserved	N/A
3	LmjF.27.0520	0.351687	7.27587e-56	5.94948e-52	0.364	0.214	radial spoke protein 3, putative	N/A
3	LmjF.36.5340	0.350747	5.32526e-53	4.35447e-49	0.249	0.133	hypothetical protein, conserved	N/A
3	LmjF.21.0570	0.350603	1.35671e-50	1.10938e-46	0.274	0.153	hypothetical protein, conserved	N/A
3	LmjF.06.0190	0.349864	5.68321e-43	4.64716e-39	0.21	0.115	hypothetical protein, conserved	N/A
3	LmjF.30.2850	0.348678	5.08659e-45	4.15931e-41	0.323	0.198	hypothetical protein, conserved	N/A
3	LmjF.28.2890	0.347769	9.45595e-55	7.73213e-51	0.455	0.286	hypothetical protein, conserved	N/A
3	LmjF.25.0320	0.347571	5.34421e-48	4.36996e-44	0.309	0.183	B9 domain-containing protein 2	N/A
3	LmjF.34.3390	0.346502	8.86707e-46	7.2506e-42	0.275	0.16	hypothetical protein, conserved	N/A
3	LmjF.20.1660	0.345558	5.8763e-35	4.80505e-31	0.124	0.061	hypothetical protein, conserved	N/A
3	LmjF.35.5340	0.344903	2.1612e-51	1.76721e-47	0.231	0.122	Dynein heavy chain and region D6 of dynein motor/Ankyrin repeats (3 copies), putative	protein binding
3	LmjF.35.1310	0.342656	3.09715e-42	2.53254e-38	0.333	0.209	histone H4	DNA binding;protein heterodimerization activity
3	LmjF.21.0380	0.342199	1.98718e-44	1.62492e-40	0.265	0.153	Protein of unknown function (DUF667), putative	N/A
3	LmjF.07.0715	0.341943	5.66839e-43	4.63504e-39	0.142	0.068	hypothetical protein	N/A
3	LmjF.35.1945	0.33963	4.59557e-39	3.7578e-35	0.2	0.111	hypothetical protein, conserved	N/A
3	LmjF.35.4760	0.337928	1.32517e-30	1.08359e-26	0.165	0.093	hypothetical protein, conserved	N/A
3	LmjF.06.0270	0.337488	2.71218e-50	2.21775e-46	0.328	0.193	hypothetical protein, conserved	N/A
3	LmjF.35.4800	0.337113	2.51516e-47	2.05664e-43	0.293	0.171	AMP deaminase, putative	AMP deaminase activity;deaminase activity
3	LmjF.24.0980	0.336859	2.79382e-45	2.2845e-41	0.253	0.143	hypothetical protein, conserved	N/A
3	LmjF.16.1410	0.33684	2.36579e-43	1.93451e-39	0.264	0.155	hypothetical protein, conserved	protein binding
3	LmjF.05.0620	0.336755	1.05073e-33	8.59181e-30	0.168	0.093	hypothetical protein, conserved	protein binding
3	LmjF.17.0150	0.336416	4.6342e-49	3.78939e-45	0.23	0.123	hypothetical protein, conserved	N/A
3	LmjF.27.1480	0.335634	3.00728e-45	2.45905e-41	0.343	0.212	cyclic nucleotide-binding domain containing protein, putative	N/A
3	LmjF.36.4230	0.327521	3.87695e-51	3.17018e-47	0.355	0.211	paraflagellar rod component, putative	protein binding
3	LmjF.20.0640	0.327496	7.61182e-44	6.22418e-40	0.252	0.145	kinesin heavy chain, putative	ATP binding;microtubule binding;microtubule motor activity
3	LmjF.12.1120	0.327214	6.38027e-44	5.21715e-40	0.235	0.132	Flagellum attachment zone protein 2	N/A
3	LmjF.28.0390	0.326789	7.99349e-41	6.53628e-37	0.242	0.14	Nucleus and spindle associated protein 1, putative	N/A
3	LmjF.08.1190	0.326013	1.58594e-45	1.29682e-41	0.373	0.236	intraflagellar transport protein 122B, putative	protein binding
3	LmjF.31.1780	0.324743	3.73273e-46	3.05225e-42	0.495	0.334	Sphingosine N-acyltransferase, putative	N/A
3	LmjF.30.3680	0.323751	6.13892e-53	5.01979e-49	0.55	0.368	hypothetical protein, conserved	N/A
3	LmjF.32.0600	0.323458	1.27852e-38	1.04544e-34	0.247	0.146	hypothetical protein, conserved	N/A
3	LmjF.11.0150	0.323276	1.64896e-35	1.34836e-31	0.248	0.151	hypothetical protein, conserved	N/A
3	LmjF.36.0450	0.320084	2.54925e-40	2.08452e-36	0.154	0.077	hypothetical protein, conserved	N/A
3	LmjF.05.0350	0.319863	6.06441e-46	4.95887e-42	0.373	0.235	trypanothione reductase	disulfide oxidoreductase activity;flavin adenine dinucleotide binding;oxidoreductase activity;oxidoreductase activity, acting on a sulfur group of donors, NAD(P) as acceptor
3	LmjF.33.2140	0.318967	5.48885e-43	4.48823e-39	0.231	0.13	kinesin, putative	ATP binding;microtubule binding;microtubule motor activity
3	LmjF.17.0733	0.317709	5.52855e-38	4.52069e-34	0.253	0.152	hypothetical protein, conserved	N/A
3	LmjF.35.4060	0.317423	4.69891e-47	3.8423e-43	0.502	0.334	Regulatory subunit of type II PKA R-subunit, putative	calcium ion binding
3	LmjF.09.0100	0.314147	2.61791e-38	2.14066e-34	0.238	0.14	flagellar pocket cytoskeletal protein bilbo1	calcium ion binding
3	LmjF.09.0910	0.312745	9.18713e-45	7.51232e-41	0.411	0.265	calmodulin, putative	calcium ion binding
3	LmjF.11.0310	0.312594	4.24591e-40	3.47188e-36	0.247	0.144	hypothetical protein, conserved	N/A
3	LmjF.28.0520	0.311535	9.23957e-35	7.5552e-31	0.104	0.048	Aurora I-related kinase	ATP binding;protein kinase activity
3	LmjF.20.1180	0.309772	6.1898e-44	5.0614e-40	0.64	0.463	calpain-like cysteine peptidase, putative	calcium-dependent cysteine-type endopeptidase activity
3	LmjF.28.2610	0.309609	4.83612e-43	3.9545e-39	0.253	0.145	hypothetical protein, conserved	protein binding
3	LmjF.06.0440	0.30922	4.85714e-43	3.97169e-39	0.284	0.168	hypothetical protein, conserved	protein binding
3	LmjF.36.4910	0.307499	3.26619e-42	2.67076e-38	0.261	0.152	hypothetical protein, conserved	N/A
3	LmjF.17.0870	0.305932	1.12524e-41	9.20108e-38	0.406	0.265	META domain containing protein	N/A
3	LmjF.36.7000	0.305698	1.73804e-31	1.42119e-27	0.109	0.053	PSP1 C-terminal conserved region, putative	N/A
3	LmjF.35.4870	0.30494	5.23617e-38	4.28162e-34	0.278	0.169	hypothetical protein, conserved	N/A
3	LmjF.05.0770	0.303993	1.82283e-36	1.49053e-32	0.246	0.147	hypothetical protein, unknown function	N/A
3	LmjF.36.6380	0.303778	3.02296e-46	2.47188e-42	0.278	0.159	rib72 protein-like protein	calcium ion binding
3	LmjF.18.0390	0.303429	2.56975e-37	2.10128e-33	0.197	0.11	hypothetical protein, conserved	N/A
3	LmjF.28.0130	0.302803	1.29464e-32	1.05863e-28	0.223	0.135	hypothetical protein, conserved	N/A
3	LmjF.10.0870	0.302035	6.89297e-39	5.63638e-35	0.393	0.259	histone H3	DNA binding;protein heterodimerization activity
3	LmjF.24.0410	0.30155	4.37092e-34	3.5741e-30	0.135	0.069	hypothetical protein, conserved	N/A
3	LmjF.33.3180	0.29942	6.43524e-38	5.26209e-34	0.186	0.101	hypothetical protein, conserved	N/A
3	LmjF.34.3110	0.299402	1.01076e-35	8.26498e-32	0.133	0.066	AAA domain containing protein, putative	N/A
3	LmjF.23.1690	0.296911	1.97373e-41	1.61392e-37	0.284	0.169	hypothetical protein	N/A
3	LmjF.08.1120	0.296126	1.90043e-44	1.55398e-40	0.243	0.136	Repeat of unknown function (DUF1126), putative	calcium ion binding
3	LmjF.31.0090	0.294668	5.99677e-43	4.90356e-39	0.383	0.242	hypothetical protein, conserved	N/A
3	LmjF.10.1190	0.294037	4.93669e-37	4.03673e-33	0.206	0.117	flagellar protofilament ribbon protein-like protein	N/A
3	LmjF.30.0808	0.293629	9.35256e-31	7.64759e-27	0.119	0.061	hypothetical protein, conserved	N/A
3	LmjF.18.0070	0.291282	1.27729e-33	1.04444e-29	0.164	0.089	zinc-finger of a C2HC-type/Double zinc ribbon, putative	N/A
3	LmjF.14.0370	0.290994	2.41224e-29	1.97249e-25	0.145	0.08	hypothetical protein, conserved	N/A
3	LmjF.28.1710	0.290704	3.07644e-41	2.51561e-37	0.273	0.161	hypothetical protein, conserved	N/A
3	LmjF.32.2550	0.290307	2.30164e-34	1.88205e-30	0.18	0.101	adenosine monophosphate deaminase-like protein	AMP deaminase activity;deaminase activity
3	LmjF.36.5920	0.28967	3.81161e-31	3.11676e-27	0.245	0.153	kinetoplast DNA-associated protein, putative	N/A
3	LmjF.29.0660	0.288399	1.33764e-40	1.09379e-36	0.478	0.324	flagellar radial spoke protein-like, putative	N/A
3	LmjF.18.0690	0.287818	3.36146e-45	2.74867e-41	0.365	0.226	hypothetical protein, conserved	N/A
3	LmjF.24.0670	0.28688	9.73573e-31	7.9609e-27	0.116	0.058	Cell division protein kinase, putative	ATP binding;protein kinase activity
3	LmjF.08.0960	0.285775	1.05832e-38	8.65385e-35	0.324	0.203	Dpy-30 motif containing protein, putative	N/A
3	LmjF.32.1640	0.285044	3.49599e-32	2.85867e-28	0.132	0.068	chromosomal passenger complex 2	N/A
3	LmjF.17.0510	0.284772	3.41097e-35	2.78915e-31	0.185	0.103	hypothetical protein, unknown function	N/A
3	LmjF.32.0350	0.284457	8.05694e-40	6.58816e-36	0.327	0.206	hypothetical protein, conserved	N/A
3	LmjF.15.1280	0.284057	2.07958e-39	1.70047e-35	0.307	0.189	hypothetical protein, conserved	protein binding
3	LmjF.13.0800	0.283709	1.59698e-33	1.30585e-29	0.191	0.11	hypothetical protein, conserved	N/A
3	LmjF.18.1640	0.283116	2.10687e-48	1.72279e-44	0.47	0.305	hypothetical protein, conserved	N/A
3	LmjF.26.1120	0.282866	7.94443e-36	6.49616e-32	0.163	0.086	axonemal dynein light chain, putative	N/A
3	LmjF.28.1180	0.282464	4.63955e-37	3.79376e-33	0.315	0.198	hypothetical protein, conserved	N/A
3	LmjF.35.0680	0.281763	2.01343e-34	1.64638e-30	0.286	0.18	hypothetical protein, conserved	N/A
3	LmjF.16.1100	0.280149	1.4925e-38	1.22042e-34	0.344	0.219	hypothetical protein, conserved	N/A
3	LmjF.32.0300	0.279979	5.38895e-39	4.40655e-35	0.325	0.204	hypothetical protein, conserved	protein binding
3	LmjF.34.2820	0.278709	3.23932e-41	2.64879e-37	0.34	0.213	regulatory subunit of protein kinase a-like protein	N/A
3	LmjF.24.1560	0.278208	1.6504e-46	1.34953e-42	0.667	0.484	hypothetical protein, conserved	N/A
3	LmjF.02.0310	0.277683	9.57975e-37	7.83336e-33	0.26	0.157	Soluble NSF attachment protein, SNAP, putative	protein binding
3	LmjF.09.0450	0.275925	7.08329e-29	5.792e-25	0.177	0.104	hypothetical protein, conserved	N/A
3	LmjF.27.1630	0.275363	1.14905e-42	9.39579e-39	0.34	0.208	inner dynein arm I1 intermediate chain, axonemal	protein binding
3	LmjF.32.2530	0.274984	1.02451e-35	8.37739e-32	0.188	0.104	cyclic nucleotide-binding domain containing protein, putative	N/A
3	LmjF.27.2130	0.274928	3.70878e-41	3.03267e-37	0.277	0.163	hypothetical protein, conserved	N/A
3	LmjF.36.4030	0.274758	1.16671e-30	9.54015e-27	0.217	0.132	metallo-peptidase, Clan MC, Family M14, putative	metallocarboxypeptidase activity;zinc ion binding
3	LmjF.14.0260	0.273688	3.82138e-36	3.12474e-32	0.295	0.184	von Willebrand factor type A domain containing protein, putative	N/A
3	LmjF.11.0390	0.273355	4.74363e-39	3.87886e-35	0.243	0.141	hypothetical protein, conserved	N/A
3	LmjF.36.2550	0.27327	4.13692e-33	3.38276e-29	0.249	0.152	hypothetical protein, conserved	N/A
3	LmjF.29.1170	0.273173	6.42998e-39	5.25779e-35	0.504	0.348	hypothetical protein, conserved	calcium ion binding
3	LmjF.35.0570	0.272767	8.26975e-38	6.76217e-34	0.263	0.158	hypothetical protein, conserved	protein binding
3	LmjF.23.1730	0.271885	3.72758e-35	3.04804e-31	0.248	0.149	RING-H2 zinc finger, putative	zinc ion binding
3	LmjF.08.1010	0.271106	2.97094e-35	2.42933e-31	0.328	0.212	cysteine peptidase B (CPB)	cysteine-type peptidase activity
3	LmjF.13.0160	0.270852	1.53241e-37	1.25305e-33	0.446	0.302	protein kinase A regulatory subunit	N/A
3	LmjF.33.1170	0.270558	3.52324e-40	2.88095e-36	0.238	0.136	hypothetical protein, conserved	N/A
3	LmjF.25.1600	0.270337	1.27866e-36	1.04556e-32	0.272	0.165	hypothetical protein, conserved	protein binding
3	LmjF.06.0990	0.268544	9.21495e-34	7.53506e-30	0.241	0.146	hypothetical protein, conserved	protein binding
3	LmjF.23.0550	0.267827	1.25275e-33	1.02438e-29	0.27	0.169	ubiquitin-activating enzyme E1, putative	ubiquitin-like modifier activating enzyme activity
3	LmjF.29.1000	0.266882	6.61059e-36	5.40548e-32	0.356	0.229	hypothetical protein, conserved	N/A
3	LmjF.30.3290	0.266705	4.88587e-33	3.99517e-29	0.214	0.126	hypothetical protein, conserved	N/A
3	LmjF.35.3925	0.265888	5.02202e-36	4.1065e-32	0.226	0.132	hypothetical protein, conserved	N/A
[truncated: 2,413 more rows]

## Sheet: MA37_cluster_markers
Supplementary Table 3. Differentially expressed genes for each of the seven cell clusters identified in L747 and MA37 (integrated irradiated and untreated samples) according to FindAllMarkers function in Seurat R package, with the following cutoff values: percentage of cells expressing a given gene > 10%, log2FC > 0.1 and Wilcoxon Rank Sum test adjusted p-value < 0.05). Pct.1: percentage of cells…
MA37_Cluster_ID	Gene_ID	Avg_log2FC	P_value	P_val_adj	Pct.1	Pct.2	Product_Description	Computed_GO_Functions
0	LmjF.33.3240	0.835599	9.5001e-248	7.76823e-244	0.691	0.468	h1 histone-like protein	N/A
0	LmjF.31.0070	0.684937	1.95232e-95	1.59642e-91	0.356	0.216	helicase-like protein	ATP binding;DNA binding;hydrolase activity
0	LmjF.21.0430	0.672571	5.76607e-126	4.71492e-122	0.52	0.355	hypothetical protein, conserved	N/A
0	LmjF.16.1320	0.656597	4.20504e-165	3.43847e-161	0.719	0.558	cytochrome c, putative	electron transfer activity;heme binding
0	LmjF.29.1870	0.654273	1.67825e-95	1.3723e-91	0.407	0.264	hypothetical protein, conserved	N/A
0	LmjF.15.1490	0.640001	1.48894e-83	1.21751e-79	0.357	0.229	hypothetical protein, conserved	N/A
0	LmjF.29.0850	0.626241	6.5206e-105	5.3319e-101	0.527	0.38	High mobility group protein TDP1	N/A
0	LmjF.33.0650	0.610147	5.01633e-84	4.10185e-80	0.362	0.229	hypothetical protein, conserved	N/A
0	LmjF.24.1500	0.598094	1.05767e-125	8.64858e-122	0.674	0.531	translationally controlled tumor protein (TCTP), putative	N/A
0	LmjF.26.0640	0.59447	7.25925e-139	5.93589e-135	0.72	0.57	10 kDa heat shock protein, putative	N/A
0	LmjF.21.1555	0.588666	4.33447e-105	3.54429e-101	0.579	0.436	hypothetical protein, conserved	N/A
0	LmjF.18.0740	0.584346	3.67281e-60	3.00326e-56	0.32	0.217	Elongation factor Tu, mitochondrial, putative	GTP binding;GTPase activity
0	LmjF.25.1780	0.582829	4.63374e-62	3.78901e-58	0.233	0.135	ATP-grasp domain containing protein, putative	ATP binding;D-alanine-D-alanine ligase activity;metal ion binding;protein binding
0	LmjF.04.0560	0.58151	6.89785e-54	5.64037e-50	0.306	0.209	lipid-like atypical dual specificity phosphatase, putative	phosphatase activity;protein tyrosine phosphatase activity
0	LmjF.32.0840	0.562703	2.08768e-92	1.7071e-88	0.56	0.429	hypothetical protein, conserved	nucleic acid binding
0	LmjF.19.0210	0.547804	1.78417e-124	1.45892e-120	0.732	0.586	ADP,ATP carrier protein 1, mitochondrial precursor, putative	ATP:ADP antiporter activity
0	LmjF.14.0670	0.540501	1.16072e-64	9.49119e-61	0.38	0.267	fatty acid elongase, putative	N/A
0	LmjF.35.4280	0.537543	1.14703e-63	9.37922e-60	0.331	0.218	Spindle assembly abnormal protein 6 homolog	N/A
0	LmjF.26.0620	0.534459	1.94859e-68	1.59336e-64	0.508	0.396	10 kDa heat shock protein, putative	N/A
0	LmjF.25.1010	0.530742	5.39962e-55	4.41527e-51	0.227	0.134	2OG-Fe(II) oxygenase superfamily, putative	oxidoreductase activity
0	LmjF.23.0950	0.525021	8.48065e-53	6.93463e-49	0.241	0.149	cytosolic leucyl aminopeptidase	manganese ion binding;metalloaminopeptidase activity
0	LmjF.26.0460	0.521604	6.43264e-115	5.25997e-111	0.753	0.637	ATPase subunit 9, putative	proton transmembrane transporter activity
0	LmjF.35.1380	0.519117	2.53284e-109	2.0711e-105	0.705	0.573	mitochondrial processing peptidase, beta subunit, putative	metal ion binding
0	LmjF.05.0510	0.517932	8.77884e-116	7.17846e-112	0.742	0.617	ATP synthase F1, alpha subunit, putative	ATP binding;proton-transporting ATP synthase activity, rotational mechanism
0	LmjF.22.0660	0.508413	1.02772e-49	8.40364e-46	0.245	0.155	glucoamylase-like protein	N/A
0	LmjF.17.0010	0.503903	3.18112e-73	2.6012e-69	0.519	0.4	eukaryotic translation initiation factor 3 subunit a	N/A
0	LmjF.36.4190	0.499593	5.00081e-48	4.08916e-44	0.184	0.105	GINS complex protein, putative	N/A
0	LmjF.28.2385	0.494536	4.15338e-46	3.39622e-42	0.289	0.198	DNA replication licensing factor MCM6, putative	ATP binding;DNA binding;DNA helicase activity
0	LmjF.33.0410	0.49285	1.05819e-49	8.6528e-46	0.304	0.208	DNA mismatch repair protein MSH2, putative	ATP binding;DNA binding;mismatched DNA binding
0	LmjF.21.1210	0.491227	8.43144e-43	6.89439e-39	0.226	0.145	thymidine kinase, putative	ATP binding;thymidine kinase activity
0	LmjF.26.1100	0.481203	4.25201e-62	3.47687e-58	0.506	0.405	hypothetical protein, conserved	N/A
0	LmjF.31.2760	0.480374	2.38897e-43	1.95346e-39	0.321	0.234	kinetoplast-associated protein-like protein	N/A
0	LmjF.36.2020	0.479062	3.63311e-73	2.97079e-69	0.592	0.476	chaperonin HSP60, mitochondrial precursor	ATP binding
0	LmjF.06.1200	0.475411	2.55819e-46	2.09183e-42	0.188	0.107	hypothetical protein, unknown function	N/A
0	LmjF.12.1220	0.472734	8.52589e-51	6.97162e-47	0.332	0.23	WD repeat and HMG-box DNA-binding protein, putative	protein binding
0	LmjF.29.1510	0.471743	2.56991e-51	2.10142e-47	0.475	0.382	Nodulin-like, putative	N/A
0	LmjF.35.0100	0.469764	2.02319e-69	1.65437e-65	0.602	0.505	ubiquinol-cytochrome c reductase complex 14kD subunit, putative	N/A
0	LmjF.21.0740	0.466398	1.21425e-61	9.92894e-58	0.556	0.454	ATPase subunit 9, putative	proton transmembrane transporter activity
0	LmjF.26.1640	0.465763	6.19269e-98	5.06377e-94	0.79	0.698	40S ribosomal protein S33, putative	structural constituent of ribosome
0	LmjF.36.1590	0.464238	2.32554e-44	1.90159e-40	0.293	0.202	STAG domain containing protein, putative	N/A
0	LmjF.14.0665	0.462459	4.30826e-84	3.52287e-80	0.642	0.524	fatty acid elongase, putative	N/A
0	LmjF.03.0200	0.460521	3.63032e-55	2.96851e-51	0.497	0.396	delta-1-pyrroline-5-carboxylate dehydrogenase, putative	1-pyrroline-5-carboxylate dehydrogenase activity;oxidoreductase activity;oxidoreductase activity, acting on the aldehyde or oxo group of donors, NAD or NADP as acceptor
0	LmjF.26.2210	0.460432	2.68109e-47	2.19233e-43	0.153	0.08	AAA ATPase domain containing protein, putative	N/A
0	LmjF.18.1510	0.458779	9.48707e-105	7.75758e-101	0.788	0.679	P-type H+-ATPase, putative	nucleotide binding;proton-exporting ATPase activity, phosphorylative mechanism
0	LmjF.34.1480	0.45744	4.56088e-31	3.72943e-27	0.21	0.143	hypothetical protein, conserved	N/A
0	LmjF.08.0890	0.454004	3.65529e-37	2.98893e-33	0.261	0.182	mitochondrial DNA polymerase beta	DNA binding;DNA polymerase activity;DNA-directed DNA polymerase activity
0	LmjF.32.2950	0.452699	1.34455e-80	1.09944e-76	0.71	0.597	nucleoside diphosphate kinase b	nucleoside diphosphate kinase activity
0	LmjF.08.1260	0.452501	1.61361e-70	1.31945e-66	0.646	0.55	hypothetical protein, conserved	N/A
0	LmjF.36.5820	0.449426	3.79104e-39	3.09993e-35	0.311	0.226	mkiaa0324 protein-like protein	N/A
0	LmjF.30.2340	0.449169	3.25427e-40	2.66102e-36	0.231	0.15	zinc-finger protein, conserved	N/A
0	LmjF.32.2940	0.448557	6.13042e-31	5.01284e-27	0.179	0.116	hypothetical protein, conserved	N/A
0	LmjF.32.3610	0.44158	2.32984e-47	1.90511e-43	0.504	0.421	hypothetical protein, conserved	N/A
0	LmjF.22.0640	0.441265	4.53619e-36	3.70924e-32	0.26	0.183	hypothetical protein, conserved	N/A
0	LmjF.17.0650	0.438447	2.32e-35	1.89706e-31	0.222	0.148	hypothetical protein, conserved	N/A
0	LmjF.35.3510	0.438035	5.00209e-42	4.09021e-38	0.319	0.229	structural maintenance of chromosome (SMC) family protein, putative	ATP binding;protein binding
0	LmjF.30.0730	0.437143	8.6241e-28	7.05192e-24	0.267	0.204	co-chaperone GrpE, putative	adenyl-nucleotide exchange factor activity;chaperone binding;protein homodimerization activity
0	LmjF.32.3780	0.435792	1.04927e-35	8.57989e-32	0.176	0.108	kinetoplast-associated protein 3, putative	N/A
0	LmjF.24.0630	0.435526	7.50079e-42	6.1334e-38	0.433	0.351	ATPase subunit 9, putative	proton transmembrane transporter activity
0	LmjF.28.2300	0.434919	8.23683e-36	6.73525e-32	0.224	0.149	hypothetical protein, conserved	N/A
0	LmjF.27.0350	0.431532	3.47403e-44	2.84072e-40	0.341	0.244	RNA recognition motif (a.k.a. RRM, RBD, or RNP domain), putative	nucleic acid binding
0	LmjF.29.0805	0.431519	1.44245e-36	1.17949e-32	0.181	0.112	hypothetical protein, conserved	N/A
0	LmjF.16.1540	0.4286	4.11543e-35	3.36519e-31	0.298	0.22	DNA polymerase I alpha catalytic subunit, putative	DNA binding;DNA-directed DNA polymerase activity;nucleic acid binding;nucleotide binding
0	LmjF.36.3470	0.42826	1.10779e-44	9.05842e-41	0.389	0.298	2-oxoglutarate dehydrogenase E1 component, putative	oxidoreductase activity, acting on the aldehyde or oxo group of donors, disulfide as acceptor;oxoglutarate dehydrogenase (succinyl-transferring) activity;thiamine pyrophosphate binding
0	LmjF.36.0330	0.427022	9.42755e-35	7.70891e-31	0.152	0.089	ribonuclease HII, putative	RNA binding;RNA-DNA hybrid ribonuclease activity;nucleic acid binding
0	LmjF.28.0825	0.426889	1.66809e-53	1.364e-49	0.541	0.45	RNA binding protein rbp16, putative	nucleic acid binding
0	LmjF.04.0770	0.425082	6.71036e-48	5.48706e-44	0.513	0.43	nascent polypeptide associated complex subunit- like protein, copy 1	N/A
0	LmjF.35.3940	0.422447	3.47773e-42	2.84374e-38	0.358	0.27	Chromosome passenger complex (CPC) protein INCENP N terminal, putative	N/A
0	LmjF.27.0110	0.420376	2.08082e-32	1.70148e-28	0.334	0.262	hypothetical protein, conserved	N/A
0	LmjF.15.1450	0.420276	4.81157e-33	3.93442e-29	0.354	0.282	proliferative cell nuclear antigen (PCNA), putative	DNA binding;DNA polymerase processivity factor activity
0	LmjF.15.0280	0.416793	6.17692e-44	5.05087e-40	0.468	0.386	ribonucleoprotein p18, mitochondrial precursor, putative	protein binding
0	LmjF.13.0690	0.416638	4.59348e-32	3.75609e-28	0.285	0.212	PSP1 C-terminal conserved region, putative	N/A
0	LmjF.11.0450	0.416573	1.54782e-28	1.26566e-24	0.231	0.166	DNA ligase, putative	N/A
0	LmjF.23.0370	0.413531	2.06917e-51	1.69196e-47	0.54	0.445	cytochrome c oxidase subunit 10, putative	N/A
0	LmjF.05.0500	0.412812	3.19655e-72	2.61382e-68	0.709	0.612	ATP synthase F1, alpha subunit, putative	ATP binding;proton-transporting ATP synthase activity, rotational mechanism
0	LmjF.29.1500	0.411961	1.94313e-125	1.5889e-121	0.929	0.846	Nodulin-like, putative	N/A
0	LmjF.07.0870	0.410595	4.98331e-39	4.07485e-35	0.47	0.396	splicing factor ptsr1-like protein	N/A
0	LmjF.05.0050	0.409862	2.42684e-28	1.98442e-24	0.192	0.13	hypothetical protein, conserved	N/A
0	LmjF.29.0020	0.408184	1.02221e-34	8.35857e-31	0.387	0.314	transcription factor-like protein	N/A
0	LmjF.35.4560	0.40713	1.18976e-31	9.72863e-28	0.162	0.1	PHD-like zinc-binding domain containing protein, putative	N/A
0	LmjF.25.0280	0.405477	5.08297e-30	4.15635e-26	0.162	0.102	hypothetical protein, conserved	N/A
0	LmjF.34.0010	0.404586	1.40712e-63	1.1506e-59	0.689	0.595	short chain dehydrogenase, putative	N/A
0	LmjF.15.1290	0.40238	2.22597e-27	1.82018e-23	0.198	0.135	mitochondrial DNA topoisomerase II	ATP binding;DNA binding;DNA topoisomerase type II (double strand cut, ATP-hydrolyzing) activity
0	LmjF.28.0850	0.401888	6.57829e-30	5.37907e-26	0.246	0.177	DNA replication licensing factor MCM2, putative	ATP binding;DNA binding
0	LmjF.25.2090	0.401695	1.31168e-34	1.07256e-30	0.359	0.285	hypothetical protein, conserved	N/A
0	LmjF.30.3090	0.399532	1.84981e-51	1.51259e-47	0.555	0.463	RNA-binding protein 42 (RNA-binding motif protein 42), putative	N/A
0	LmjF.28.2080	0.399217	9.22489e-75	7.5432e-71	0.727	0.631	DEAD-box ATP-dependent RNA helicase, mitochondrial	ATP binding;nucleic acid binding
0	LmjF.27.0600	0.398853	7.62443e-26	6.2345e-22	0.18	0.122	hypothetical protein, conserved	N/A
0	LmjF.27.0130	0.398416	3.40711e-155	2.786e-151	0.963	0.914	WW domain/Zinc finger C-x8-C-x5-C-x3-H type (and similar), putative	metal ion binding;protein binding
0	LmjF.05.1090	0.397339	2.67676e-31	2.18879e-27	0.267	0.195	double-strand-break repair protein rad21 homolog, putative	protein binding
0	LmjF.26.2300	0.396849	5.11497e-26	4.18251e-22	0.228	0.166	hypothetical protein, conserved	N/A
0	LmjF.30.1110	0.395302	2.79092e-28	2.28213e-24	0.266	0.2	RNA-binding protein, putative	nucleic acid binding
0	LmjF.35.0140	0.395003	6.83684e-25	5.59048e-21	0.266	0.206	hypothetical protein, conserved	N/A
0	LmjF.36.4460	0.39479	6.42894e-26	5.25694e-22	0.347	0.288	hypothetical protein, conserved	N/A
0	LmjF.28.1420	0.394478	3.31874e-28	2.71374e-24	0.29	0.223	DNA polymerase kappa, putative	DNA-directed DNA polymerase activity;damaged DNA binding
0	LmjF.07.0060	0.391937	9.65418e-37	7.89422e-33	0.45	0.376	cytochrome c1, heme protein, mitochondrial, putative	electron transfer activity;heme binding
0	LmjF.32.3790	0.391704	1.00081e-25	8.18359e-22	0.316	0.254	cyclin-dependent kinase regulatory subunit	cyclin-dependent protein serine/threonine kinase regulator activity
0	LmjF.28.0890	0.391566	5.87306e-51	4.8024e-47	0.52	0.417	ribonucleoside-diphosphate reductase large chain, putative	ATP binding;ribonucleoside-diphosphate reductase activity, thioredoxin disulfide as acceptor
0	LmjF.26.0890	0.391195	2.07261e-170	1.69478e-166	0.972	0.919	40S ribosomal protein S16, putative	structural constituent of ribosome
0	LmjF.09.0970	0.390616	1.22276e-59	9.99852e-56	0.678	0.594	elongation factor-1 gamma	protein binding;translation elongation factor activity
0	LmjF.26.1350	0.390578	4.74697e-28	3.8816e-24	0.141	0.086	mitochondrial DNA ligase homolog, putative	ATP binding;DNA ligase (ATP) activity;DNA ligase activity
0	LmjF.25.1170	0.389044	2.35933e-64	1.92922e-60	0.719	0.626	ATP synthase subunit beta, mitochondrial, putative	ATP binding;proton-transporting ATP synthase activity, rotational mechanism
0	LmjF.25.1590	0.388391	3.52374e-27	2.88136e-23	0.189	0.128	hypothetical protein, conserved	N/A
0	LmjF.36.0190	0.385833	1.40005e-233	1.14482e-229	0.995	0.97	elongation factor 2	GTP binding;GTPase activity
0	LmjF.25.0730	0.383386	3.29863e-39	2.69729e-35	0.55	0.481	eukaryotic initiation factor 5a, putative	RNA binding;ribosome binding;translation elongation factor activity
0	LmjF.30.1900	0.383075	8.74157e-23	7.14798e-19	0.151	0.101	hypothetical protein, conserved	N/A
0	LmjF.35.4470	0.38227	1.12073e-63	9.16422e-60	0.751	0.658	Co-chaperone protein P23	N/A
0	LmjF.13.0400	0.382269	2.02444e-28	1.65538e-24	0.299	0.231	Sister chromatid cohesion C-terminus, putative	chromatin binding
0	LmjF.31.0080	0.382041	4.97888e-73	4.07123e-69	0.782	0.691	hypothetical protein, conserved	metal ion binding
0	LmjF.36.0250	0.381955	1.97476e-37	1.61476e-33	0.494	0.421	eukaryotic translation initiation factor 3 subunit l	translation initiation factor activity
0	LmjF.22.1640	0.381666	9.95076e-21	8.13673e-17	0.307	0.257	hypothetical protein, conserved	N/A
0	LmjF.35.0970	0.38099	1.33909e-40	1.09498e-36	0.559	0.488	aldose 1-epimerase, putative	carbohydrate binding;catalytic activity;isomerase activity
0	LmjF.24.1510	0.380824	4.3907e-30	3.59028e-26	0.436	0.372	translationally controlled tumor protein (TCTP), putative	N/A
0	LmjF.03.0870	0.378924	1.65458e-26	1.35295e-22	0.211	0.149	hypothetical protein, conserved	protein binding
0	LmjF.25.0920	0.378488	3.95788e-20	3.23636e-16	0.187	0.137	Histone RNA hairpin-binding protein RNA-binding domain containing protein, putative	RNA binding;mRNA binding
0	LmjF.06.0210	0.378255	2.71199e-50	2.21759e-46	0.567	0.462	FHA domain containing protein, putative	protein binding
0	LmjF.18.1180	0.376764	6.80014e-24	5.56048e-20	0.217	0.158	hypothetical protein, conserved	N/A
0	LmjF.21.1660	0.376715	8.0186e-25	6.55681e-21	0.185	0.128	mitochondrial structure specific endonuclease I (SSE-1), putative	5'-flap endonuclease activity;DNA binding;catalytic activity
0	LmjF.35.0360	0.375996	7.54681e-23	6.17103e-19	0.273	0.216	enoyl-CoA hydratase/isomerase family protein, conserved	catalytic activity
0	LmjF.36.5100	0.375627	9.21408e-43	7.53435e-39	0.55	0.472	hypothetical protein, conserved	N/A
0	LmjF.09.0010	0.375503	1.7607e-31	1.43972e-27	0.453	0.387	hypothetical protein, conserved	N/A
0	LmjF.19.1315	0.375103	7.02393e-21	5.74347e-17	0.248	0.196	hypothetical protein, conserved	N/A
0	LmjF.24.0140	0.374039	3.44273e-24	2.81512e-20	0.367	0.314	ankyrin/TPR repeat protein	protein binding
0	LmjF.22.0390	0.373793	1.02211e-19	8.35781e-16	0.233	0.18	DNA primase small subunit, putative	DNA primase activity
0	LmjF.14.0920	0.372578	9.39222e-28	7.68002e-24	0.362	0.295	mitochondrial DNA polymerase I protein C	DNA binding;DNA-directed DNA polymerase activity
0	LmjF.33.1140	0.372191	5.6408e-63	4.61248e-59	0.68	0.565	hypothetical protein, conserved	N/A
0	LmjF.35.3100	0.37138	4.63986e-78	3.79401e-74	0.813	0.706	ATP-dependent RNA helicase, putative	ATP binding;helicase activity;nucleic acid binding
0	LmjF.27.1260	0.3691	1.09936e-33	8.98945e-30	0.496	0.431	T-complex protein 1, beta subunit, putative	ATP binding;unfolded protein binding
0	LmjF.35.4380	0.365391	1.21067e-44	9.89969e-41	0.579	0.497	hypothetical protein, conserved	N/A
0	LmjF.01.0320	0.365045	2.80119e-19	2.29053e-15	0.243	0.193	poly(A) export protein, putative	protein binding
0	LmjF.34.3450	0.364967	2.53091e-27	2.06953e-23	0.242	0.174	hypothetical protein, conserved	N/A
0	LmjF.36.6710	0.363804	6.94109e-20	5.67573e-16	0.178	0.129	replication factor C subunit 3, putative	DNA binding
0	LmjF.17.1290	0.363742	6.20492e-45	5.07377e-41	0.552	0.475	eukaryotic translation initiation factor 3 subunit b	RNA binding;translation initiation factor activity;translation initiation factor binding
0	LmjF.07.0790	0.363699	3.26981e-24	2.67372e-20	0.213	0.154	hypothetical protein, conserved	N/A
0	LmjF.23.1130	0.36311	3.73605e-19	3.05497e-15	0.16	0.113	hypothetical protein, conserved	microtubule binding
0	LmjF.36.0480	0.363083	5.23042e-68	4.27691e-64	0.742	0.65	hypothetical protein, conserved	N/A
0	LmjF.34.0840	0.36271	2.40465e-35	1.96628e-31	0.514	0.445	translation elongation factor 1-beta, putative	translation elongation factor activity
0	LmjF.32.2050	0.36171	3.91219e-22	3.199e-18	0.352	0.3	hypothetical protein, unknown function	N/A
0	LmjF.30.1260	0.360932	5.09269e-27	4.16429e-23	0.254	0.187	hypothetical protein, conserved	N/A
0	LmjF.25.0590	0.360058	3.44616e-48	2.81792e-44	0.617	0.528	hypothetical protein, conserved	N/A
0	LmjF.19.1050	0.35964	9.67332e-23	7.90987e-19	0.21	0.152	hypothetical protein, unknown function	N/A
0	LmjF.36.2220	0.356907	2.74928e-19	2.24808e-15	0.12	0.078	hypothetical protein, conserved	N/A
0	LmjF.36.1950	0.356903	3.15972e-24	2.5837e-20	0.279	0.217	DNA mismatch repair protein MSH6, putative	ATP binding;mismatched DNA binding
0	LmjF.12.0640	0.356702	6.15873e-21	5.036e-17	0.288	0.235	primase 2, putative	hydrolase activity, acting on acid anhydrides
0	LmjF.30.2490	0.355761	1.98452e-39	1.62274e-35	0.568	0.494	heat shock 70-related protein 1, mitochondrial precursor, putative	ATP binding;unfolded protein binding
0	LmjF.04.0670	0.355268	7.57491e-72	6.194e-68	0.847	0.768	hypothetical protein, conserved	N/A
0	LmjF.05.1050	0.354832	9.95569e-22	8.14077e-18	0.221	0.165	hypothetical protein, unknown function	N/A
0	LmjF.30.2830	0.354482	5.04168e-21	4.12258e-17	0.237	0.183	hypothetical protein, conserved	N/A
0	LmjF.27.1650	0.354441	6.20983e-21	5.07778e-17	0.223	0.168	hypothetical protein, conserved	N/A
0	LmjF.26.1610	0.353652	7.36322e-30	6.02091e-26	0.427	0.355	Proline dehydrogenase, mitochondrial	calcium ion binding;proline dehydrogenase activity
0	LmjF.06.0860	0.352775	2.63459e-23	2.15431e-19	0.313	0.252	dihydrofolate reductase-thymidylate synthase	dihydrofolate reductase activity;thymidylate synthase activity
0	LmjF.36.0270	0.35271	9.64492e-24	7.88665e-20	0.141	0.091	hypothetical protein, conserved	N/A
0	LmjF.31.0730	0.352064	2.5313e-26	2.06984e-22	0.321	0.254	hypothetical protein, unknown function	N/A
0	LmjF.28.1490	0.352015	2.13213e-54	1.74345e-50	0.707	0.621	Protein of unknown function (DUF423), putative	N/A
0	LmjF.21.0125	0.350448	3.4396e-18	2.81256e-14	0.218	0.169	DNA topoisomerase 1A	DNA binding;DNA topoisomerase activity;DNA topoisomerase type I (single strand cut, ATP-independent) activity
0	LmjF.34.2700	0.34982	4.83299e-17	3.95194e-13	0.274	0.228	eukaryotic translation initiation factor 3 subunit g	nucleic acid binding;translation initiation factor activity
0	LmjF.14.1480	0.349042	4.29611e-22	3.51293e-18	0.199	0.145	glutathione-S-transferase/glutaredoxin, putative	prostaglandin-E synthase activity;protein disulfide oxidoreductase activity
0	LmjF.33.1500	0.347897	5.23982e-20	4.2846e-16	0.18	0.13	hypothetical protein, conserved	N/A
0	LmjF.25.1360	0.346302	2.76136e-21	2.25796e-17	0.132	0.085	hypothetical protein, conserved	N/A
0	LmjF.35.4430	0.343639	4.108e-34	3.35911e-30	0.52	0.449	mitochondrial phosphate transporter, putative	N/A
0	LmjF.01.0350	0.343179	1.29306e-19	1.05733e-15	0.208	0.157	hypothetical protein, conserved	N/A
0	LmjF.32.0240	0.342184	5.4515e-22	4.45769e-18	0.208	0.152	hypothetical protein, conserved	N/A
0	LmjF.35.0960	0.34167	6.18439e-20	5.05698e-16	0.183	0.133	hypothetical protein, conserved	N/A
0	LmjF.26.1710	0.340014	1.49192e-23	1.21994e-19	0.47	0.42	cytochrome c oxidase subunit V, putative	N/A
0	LmjF.23.1580	0.339557	3.03461e-21	2.4814e-17	0.252	0.194	Nucleoside 2-deoxyribosyltransferase, putative	N/A
0	LmjF.35.0380	0.339557	1.10357e-18	9.02391e-15	0.24	0.191	thioredoxin, putative	N/A
0	LmjF.14.0190	0.337629	2.93171e-37	2.39726e-33	0.585	0.523	Thioredoxin-like, putative	N/A
0	LmjF.26.0560	0.336075	5.87156e-19	4.80117e-15	0.228	0.176	hypothetical protein, conserved	N/A
0	LmjF.35.0660	0.335845	2.6543e-29	2.17042e-25	0.136	0.08	RING finger protein, conserved	N/A
0	LmjF.31.2830	0.335755	1.04261e-18	8.52541e-15	0.205	0.155	hypothetical protein, conserved	N/A
0	LmjF.21.1150	0.33567	3.9318e-19	3.21503e-15	0.203	0.152	hypothetical protein, conserved	N/A
0	LmjF.33.1230	0.335626	8.80339e-22	7.19854e-18	0.128	0.082	WD domain, G-beta repeat, putative	protein binding
0	LmjF.36.1620	0.334221	7.22016e-137	5.90392e-133	0.984	0.946	universal minicircle sequence binding protein	nucleic acid binding;zinc ion binding
0	LmjF.27.1890	0.333852	2.8503e-19	2.33069e-15	0.214	0.162	endo/exonuclease Mre11, putative	endonuclease activity;hydrolase activity;manganese ion binding
0	LmjF.28.2310	0.333774	2.14869e-24	1.75699e-20	0.402	0.345	Eukaryotic translation initiation factor 3 subunit E	translation initiation factor activity
0	LmjF.26.2390	0.333678	2.0334e-16	1.66271e-12	0.213	0.167	Primase zinc finger/Mcm10 replication factor, putative	double-stranded DNA binding;single-stranded DNA binding
0	LmjF.24.0830	0.332995	9.46072e-21	7.73603e-17	0.343	0.29	Mitochondrial SSU ribosomal protein, putative	protein binding
0	LmjF.15.1520	0.332671	4.86551e-24	3.97852e-20	0.399	0.341	hypothetical protein, conserved	N/A
0	LmjF.27.0020	0.332601	7.57641e-18	6.19523e-14	0.149	0.104	Meckelin (Transmembrane protein 67), putative	N/A
0	LmjF.24.2110	0.332295	1.47618e-58	1.20707e-54	0.765	0.683	3-hydroxy-3-methylglutaryl-CoA synthase, putative	transferase activity, transferring acyl groups
0	LmjF.32.0450	0.331163	3.02409e-73	2.4728e-69	0.89	0.828	40S ribosomal protein S2	RNA binding;structural constituent of ribosome
0	LmjF.21.0710	0.329848	2.7615e-18	2.25808e-14	0.32	0.274	ATP-binding cassette protein subfamily E, member 1, putative	ATP binding;ATPase activity
0	LmjF.20.0520	0.329723	2.0103e-16	1.64382e-12	0.16	0.117	hypothetical protein, conserved	N/A
0	LmjF.13.0870	0.329496	5.42866e-38	4.43901e-34	0.595	0.526	mitochondrial processing peptidase alpha subunit, putative	metal ion binding
0	LmjF.31.0550	0.327941	6.76591e-24	5.53249e-20	0.339	0.277	hypothetical protein, conserved	N/A
0	LmjF.31.2580	0.326277	6.00677e-19	4.91174e-15	0.345	0.298	ubiquinol-cytochrome-c reductase-like protein	ubiquinol-cytochrome-c reductase activity
0	LmjF.30.3040	0.324682	4.83438e-25	3.95308e-21	0.477	0.426	eukaryotic translation initiation factor 3 subunit d	translation initiation factor activity
0	LmjF.23.1220	0.322586	1.24591e-38	1.01878e-34	0.636	0.567	T-complex protein 1, gamma subunit, putative	ATP binding;unfolded protein binding
0	LmjF.36.6760	0.32195	1.73046e-23	1.415e-19	0.398	0.343	ATP synthase delta (OSCP) subunit, putative	proton-transporting ATP synthase activity, rotational mechanism
0	LmjF.36.5810	0.321264	1.89999e-14	1.55362e-10	0.174	0.133	hypothetical protein, conserved	N/A
0	LmjF.15.0380	0.320432	5.48307e-46	4.48351e-42	0.727	0.655	60S acidic ribosomal protein, putative	structural constituent of ribosome
0	LmjF.26.0540	0.319024	3.66118e-18	2.99375e-14	0.191	0.142	hypothetical protein, conserved	N/A
0	LmjF.34.2340	0.318828	2.2758e-20	1.86092e-16	0.434	0.39	asparaginyl-tRNA synthetase, putative	ATP binding;aminoacyl-tRNA ligase activity;asparagine-tRNA ligase activity;nucleic acid binding;nucleotide binding
0	LmjF.35.1100	0.318758	3.98128e-14	3.25549e-10	0.186	0.146	hypothetical protein, conserved	N/A
0	LmjF.27.2100	0.318195	3.69088e-14	3.01803e-10	0.334	0.299	RNA-binding protein, putative	nucleic acid binding;zinc ion binding
0	LmjF.36.3653	0.317789	2.96105e-13	2.42125e-09	0.16	0.122	hypothetical protein, conserved	N/A
0	LmjF.26.0870	0.317166	7.76494e-15	6.34939e-11	0.246	0.202	ISWI complex protein	N/A
0	LmjF.19.1170	0.316364	2.58396e-14	2.11291e-10	0.173	0.133	hypothetical protein, unknown function	N/A
0	LmjF.35.2750	0.31594	1.7783e-17	1.45411e-13	0.168	0.122	hypothetical protein, conserved	N/A
0	LmjF.01.0730	0.315523	2.05924e-15	1.68384e-11	0.146	0.105	Meckel syndrome type 6 protein, putative	N/A
0	LmjF.08.0020	0.315357	3.76663e-12	3.07998e-08	0.184	0.148	hypothetical protein, conserved	N/A
0	LmjF.30.3600	0.314683	3.93983e-13	3.2216e-09	0.315	0.282	ATP synthase, epsilon chain, putative	proton-transporting ATP synthase activity, rotational mechanism
0	LmjF.13.1600	0.314382	7.83684e-17	6.40819e-13	0.24	0.192	hypothetical protein, conserved	N/A
0	LmjF.22.0300	0.31385	3.98457e-25	3.25818e-21	0.444	0.389	hypothetical protein, conserved	N/A
0	LmjF.25.0130	0.313191	2.00324e-15	1.63805e-11	0.168	0.126	elongation factor, putative	GTP binding;GTPase activity
0	LmjF.17.0290	0.311835	6.71345e-17	5.48959e-13	0.133	0.092	Zinc finger, C3HC4 type (RING finger), putative	N/A
0	LmjF.35.1480	0.311452	5.17705e-35	4.23327e-31	0.627	0.554	arginase	arginase activity;hydrolase activity, acting on carbon-nitrogen (but not peptide) bonds, in linear amidines;metal ion binding
0	LmjF.07.0540	0.311243	2.33006e-12	1.90529e-08	0.196	0.159	hypothetical protein, conserved	N/A
0	LmjF.35.1470	0.310718	4.04875e-19	3.31066e-15	0.421	0.376	choline/ethanolamine kinase, putative	N/A
0	LmjF.34.4010	0.310611	1.98744e-16	1.62513e-12	0.332	0.287	hypothetical protein, conserved	N/A
0	LmjF.28.2170	0.30935	2.77042e-14	2.26537e-10	0.272	0.232	Mitochondrial import receptor subunit ATOM69, putative	protein binding
0	LmjF.31.1000	0.30816	1.44304e-19	1.17997e-15	0.357	0.304	hypothetical protein, conserved	N/A
0	LmjF.35.1430	0.307614	1.29528e-17	1.05915e-13	0.386	0.346	60S ribosomal protein L2, putative	structural constituent of ribosome
0	LmjF.30.0880	0.307174	1.13272e-17	9.26229e-14	0.369	0.323	adenosine kinase, putative	adenosine kinase activity
0	LmjF.36.0210	0.306912	4.6059e-15	3.76624e-11	0.26	0.216	SET domain protein, putative	protein binding
0	LmjF.36.1430	0.306728	5.36231e-58	4.38476e-54	0.854	0.775	translation elongation factor 1-beta, putative	translation elongation factor activity
0	LmjF.35.1650	0.306319	7.01596e-15	5.73695e-11	0.16	0.119	hypothetical protein, conserved	N/A
0	LmjF.36.3220	0.305946	1.99152e-12	1.62846e-08	0.194	0.156	hypothetical protein, conserved	N/A
0	LmjF.03.0110	0.30478	1.1681e-16	9.55159e-13	0.141	0.099	hypothetical protein, conserved	N/A
0	LmjF.28.2760	0.304539	4.07918e-15	3.33555e-11	0.249	0.205	gamma-tubulin complex component 3	gamma-tubulin binding
0	LmjF.09.1200	0.304326	3.5867e-12	2.93284e-08	0.194	0.157	hypothetical protein, conserved	protein binding
0	LmjF.23.0680	0.303125	5.758e-14	4.70831e-10	0.285	0.244	mitochondrial DNA primase, putative	hydrolase activity, acting on acid anhydrides
0	LmjF.32.0580	0.302498	3.93509e-13	3.21772e-09	0.138	0.102	hypothetical protein, conserved	N/A
0	LmjF.23.1280	0.302266	3.42002e-15	2.79655e-11	0.197	0.154	hypothetical protein, conserved	N/A
0	LmjF.25.0880	0.301816	3.19469e-16	2.6123e-12	0.219	0.172	Leucine Rich Repeat, putative	protein binding
0	LmjF.32.3630	0.301461	1.22782e-16	1.00399e-12	0.132	0.092	hypothetical protein, conserved	N/A
0	LmjF.35.0740	0.3012	3.61182e-16	2.95338e-12	0.174	0.129	hypothetical protein, conserved	protein binding
0	LmjF.33.2800	0.301024	3.34559e-12	2.73569e-08	0.28	0.246	hypothetical protein, conserved	N/A
0	LmjF.26.2305	0.300204	1.83677e-14	1.50193e-10	0.192	0.15	hypothetical protein, conserved	N/A
0	LmjF.04.1090	0.299885	2.82287e-10	2.30826e-06	0.208	0.177	hypothetical protein, conserved	N/A
0	LmjF.17.1090	0.299123	1.56158e-17	1.2769e-13	0.234	0.182	Peptidase C19, ubiquitin carboxyl-terminal hydrolase, putative	thiol-dependent ubiquitin-specific protease activity
0	LmjF.18.1140	0.299077	3.1133e-14	2.54575e-10	0.179	0.138	hypothetical protein, conserved	N/A
0	LmjF.11.0290	0.298358	3.64868e-16	2.98353e-12	0.204	0.157	hypothetical protein, unknown function	N/A
0	LmjF.13.0530	0.297105	3.83507e-13	3.13594e-09	0.243	0.204	hypothetical protein, conserved	N/A
0	LmjF.36.5920	0.296526	2.23513e-14	1.82766e-10	0.264	0.22	kinetoplast DNA-associated protein, putative	N/A
0	LmjF.25.2010	0.296042	2.18365e-40	1.78557e-36	0.722	0.645	2,4-dihydroxyhept-2-ene-1,7-dioic acid aldolase, putative	catalytic activity
0	LmjF.34.0820	0.295718	1.05518e-23	8.62825e-20	0.505	0.456	elongation factor 1-beta	translation elongation factor activity
0	LmjF.36.4800	0.295636	1.07832e-15	8.8174e-12	0.103	0.067	hypothetical protein, conserved	N/A
0	LmjF.06.0740	0.295291	2.98535e-15	2.44112e-11	0.136	0.096	hypothetical protein, conserved	N/A
0	LmjF.08.0550	0.29255	2.13516e-13	1.74592e-09	0.322	0.287	eukaryotic translation initiation factor 2 beta subunit, putative	translation initiation factor activity
0	LmjF.36.6980	0.291407	3.12584e-26	2.556e-22	0.54	0.485	eukaryotic translation initiation factor 3 subunit c	RNA binding;translation initiation factor activity;translation initiation factor binding
0	LmjF.22.1290	0.290967	1.32064e-16	1.07989e-12	0.303	0.254	ribonucleoside-diphosphate reductase small chain, putative	oxidoreductase activity
0	LmjF.34.2580	0.290811	2.30341e-74	1.88349e-70	0.931	0.856	ALBA-domain protein 3	nucleic acid binding
0	LmjF.17.1280	0.290516	9.10437e-12	7.44464e-08	0.313	0.279	hypothetical protein, conserved	N/A
0	LmjF.33.0850	0.289993	1.21751e-11	9.95556e-08	0.168	0.132	hypothetical protein, unknown function	N/A
0	LmjF.11.1030	0.289956	3.59157e-18	2.93683e-14	0.421	0.378	hypothetical protein, conserved	N/A
0	LmjF.35.2200	0.289469	9.79258e-29	8.00739e-25	0.565	0.51	RNA-binding protein, putative	nucleic acid binding
0	LmjF.26.2240	0.289008	3.43343e-12	2.80752e-08	0.266	0.227	kynureninase, putative	catalytic activity;kynureninase activity;pyridoxal phosphate binding
0	LmjF.11.0860	0.288764	1.74288e-16	1.42516e-12	0.258	0.209	hypothetical protein, conserved	N/A
0	LmjF.27.0650	0.288633	6.67445e-10	5.45769e-06	0.23	0.199	hypothetical protein, conserved	N/A
0	LmjF.23.0960	0.287432	4.19875e-10	3.43332e-06	0.172	0.139	hypothetical protein, conserved	N/A
0	LmjF.22.1070	0.286912	1.45137e-10	1.18678e-06	0.174	0.141	hypothetical protein, conserved	N/A
0	LmjF.33.1070	0.286349	4.95097e-31	4.04841e-27	0.615	0.554	hypothetical protein, unknown function	N/A
0	LmjF.35.4550	0.286209	3.32912e-20	2.72222e-16	0.423	0.366	hypothetical protein, conserved	protein binding
0	LmjF.25.1020	0.285147	5.09265e-11	4.16426e-07	0.221	0.187	dehydrogenase-like protein	NAD binding;NADP binding;oxidoreductase activity
0	LmjF.28.1360	0.283032	1.21272e-14	9.91641e-11	0.295	0.253	haloacid dehalogenase-like hydrolase-like protein	hydrolase activity
0	LmjF.03.0440	0.282604	1.06409e-19	8.70103e-16	0.51	0.467	60S acidic ribosomal protein P2, putative	structural constituent of ribosome
0	LmjF.32.0030	0.282067	1.11498e-14	9.11722e-11	0.249	0.204	hypothetical protein, unknown function	metal ion binding
0	LmjF.25.0080	0.281788	1.04905e-11	8.57809e-08	0.297	0.263	poly(A)-binding protein 3	RNA binding;nucleic acid binding
0	LmjF.36.1830	0.281435	8.477e-09	6.93164e-05	0.166	0.138	hypothetical protein, conserved	N/A
0	LmjF.32.2310	0.281303	2.06297e-13	1.68689e-09	0.229	0.187	hypothetical protein, conserved	N/A
0	LmjF.36.3910	0.281282	1.49776e-43	1.22472e-39	0.76	0.693	S-adenosylhomocysteine hydrolase	adenosylhomocysteinase activity
0	LmjF.35.4760	0.280703	6.94404e-12	5.67814e-08	0.218	0.18	hypothetical protein, conserved	N/A
0	LmjF.30.3450	0.280666	2.28722e-09	1.87026e-05	0.246	0.218	hypothetical protein, conserved	protein binding
0	LmjF.35.0950	0.280116	1.0584e-13	8.65455e-10	0.219	0.177	cell cycle sequence binding phosphoprotein (RBP33), putative	N/A
0	LmjF.36.3100	0.279652	1.49406e-13	1.22169e-09	0.297	0.256	ATP synthase, putative	proton-transporting ATPase activity, rotational mechanism
0	LmjF.03.0960	0.279121	1.26014e-13	1.03042e-09	0.322	0.282	hypothetical protein, conserved	N/A
0	LmjF.27.1110	0.279093	1.30912e-13	1.07047e-09	0.342	0.306	guide RNA-binding protein of 21 kDa	DNA binding
0	LmjF.05.0160	0.278735	2.38043e-13	1.94648e-09	0.122	0.087	hypothetical protein, unknown function	N/A
0	LmjF.35.1540	0.278182	1.45635e-26	1.19085e-22	0.552	0.5	rieske iron-sulfur protein, mitochondrial precursor, putative	2 iron, 2 sulfur cluster binding;ubiquinol-cytochrome-c reductase activity
0	LmjF.15.0825	0.277989	1.33292e-11	1.08993e-07	0.163	0.128	hypothetical protein, conserved	N/A
0	LmjF.21.1000	0.277774	3.83828e-11	3.13856e-07	0.193	0.157	hypothetical protein, unknown function	N/A
0	LmjF.21.1568	0.27763	1.76749e-10	1.44528e-06	0.174	0.142	hypothetical protein, conserved	N/A
0	LmjF.22.1490	0.277454	2.24884e-08	0.000183888	0.213	0.186	kinetoplastid-specific phospho-protein phosphatase, putative	hydrolase activity
0	LmjF.07.0340	0.276892	4.60157e-12	3.7627e-08	0.326	0.291	ATP-dependent RNA helicase DBP2B, putative	ATP binding;helicase activity;nucleic acid binding
0	LmjF.32.1700	0.276547	2.17841e-10	1.78128e-06	0.146	0.114	hypothetical protein, conserved	N/A
0	LmjF.02.0450	0.276124	3.11508e-14	2.5472e-10	0.365	0.326	voltage-dependent anion-selective channel, putative	voltage-gated anion channel activity
0	LmjF.03.0150	0.276061	2.69602e-08	0.000220454	0.228	0.202	hypothetical protein, conserved	N/A
0	LmjF.34.0630	0.275614	1.10498e-11	9.03544e-08	0.163	0.127	hypothetical protein, conserved	N/A
0	LmjF.34.0910	0.275581	1.62839e-12	1.33154e-08	0.347	0.313	hypothetical protein, conserved	N/A
0	LmjF.34.4290	0.275479	1.5154e-09	1.23915e-05	0.255	0.224	nucleolar protein family a, putative	N/A
0	LmjF.29.0380	0.274734	3.69593e-10	3.02216e-06	0.172	0.139	Domain of unknown function (DUF3451), putative	N/A
0	LmjF.21.1090	0.273747	9.03336e-14	7.38658e-10	0.392	0.357	T-complex protein 1, delta subunit, putative	ATP binding;unfolded protein binding
0	LmjF.12.0620	0.272708	1.59558e-10	1.30471e-06	0.245	0.212	hypothetical protein, conserved	N/A
0	LmjF.13.1490	0.2726	1.41072e-09	1.15354e-05	0.171	0.14	hypothetical protein, conserved	N/A
0	LmjF.32.1635	0.271921	6.88818e-12	5.63247e-08	0.155	0.119	hypothetical protein, conserved	N/A
0	LmjF.28.0010	0.271823	7.88736e-07	0.00644949	0.195	0.173	hypothetical protein, conserved	N/A
0	LmjF.04.0840	0.271514	3.59702e-12	2.94128e-08	0.243	0.205	atypical dual specificity phosphatase, putative	N/A
0	LmjF.35.5270	0.27096	6.81505e-12	5.57267e-08	0.205	0.167	WD domain, G-beta repeat, putative	protein binding
0	LmjF.33.2390	0.270441	7.44969e-22	6.09161e-18	0.507	0.458	heat shock protein, putative	ATP binding;unfolded protein binding
0	LmjF.26.1785	0.270314	5.62518e-10	4.59971e-06	0.155	0.123	histone acetyltransferase subunit NuA4, putative	N/A
0	LmjF.25.0960	0.270124	2.22952e-12	1.82308e-08	0.146	0.11	tubulin gamma chain	GTP binding;GTPase activity
0	LmjF.25.1980	0.269819	7.9964e-11	6.53866e-07	0.188	0.154	hypothetical protein, conserved	N/A
0	LmjF.35.1240	0.269451	5.19636e-11	4.24906e-07	0.141	0.108	hypothetical protein, conserved	N/A
0	LmjF.06.0040	0.268738	5.66701e-10	4.63391e-06	0.157	0.126	39S mitochondrial ribosomal protein L46, putative	structural constituent of ribosome
0	LmjF.32.2640	0.268667	1.17308e-10	9.5923e-07	0.144	0.113	cysteine desulfhydrase	catalytic activity;cystathionine beta-lyase activity;pyridoxal phosphate binding
0	LmjF.36.3930	0.268075	8.1944e-10	6.70056e-06	0.236	0.203	telomerase reverse transcriptase, putative	DNA binding;RNA-directed DNA polymerase activity;telomerase RNA reverse transcriptase activity
0	LmjF.15.0230	0.268072	7.0415e-14	5.75783e-10	0.393	0.362	lysyl-tRNA synthetase, putative	ATP binding;aminoacyl-tRNA ligase activity;lysine-tRNA ligase activity;nucleic acid binding;nucleotide binding
0	LmjF.28.0930	0.267797	2.67442e-10	2.18687e-06	0.227	0.195	Mitochondrial import receptor subunit ATOM46, putative	N/A
0	LmjF.25.1130	0.267433	3.78566e-19	3.09554e-15	0.465	0.423	cytochrome oxidase subunit VII	N/A
0	LmjF.36.2115	0.267182	8.51417e-12	6.96204e-08	0.15	0.114	hypothetical protein, conserved	N/A
0	LmjF.16.0590	0.266792	2.04197e-11	1.66972e-07	0.333	0.302	carbamoyl-phosphate synthase, putative	ATP binding;argininosuccinate synthase activity;carbamoyl-phosphate synthase (glutamine-hydrolyzing) activity;metal ion binding
0	LmjF.16.1370	0.266448	7.41239e-14	6.06111e-10	0.348	0.309	hypothetical protein, conserved	N/A
0	LmjF.24.1960	0.265941	1.3471e-12	1.10153e-08	0.235	0.195	hypothetical protein, conserved	N/A
0	LmjF.35.3250	0.265566	1.38858e-08	0.000113544	0.21	0.182	replication factor C, subunit 3, putative	ATP binding;ATPase activity;DNA binding
0	LmjF.36.3690	0.265268	1.71854e-09	1.40525e-05	0.203	0.171	Nucleoporin NUP119	N/A
0	LmjF.31.0990	0.265203	9.72537e-13	7.95243e-09	0.243	0.204	hypothetical protein, unknown function	N/A
0	LmjF.07.1105	0.263756	1.91021e-14	1.56198e-10	0.416	0.382	ATPase subunit 9, putative, pseudogene	N/A
0	LmjF.32.0210	0.262641	1.29477e-13	1.05873e-09	0.37	0.333	Histone chaperone Rttp106-like, putative	N/A
0	LmjF.14.0420	0.262416	1.30742e-11	1.06908e-07	0.134	0.1	Iguana/Dzip1-like DAZ-interacting protein N-terminal, putative	N/A
0	LmjF.11.0480	0.262369	1.35123e-10	1.1049e-06	0.274	0.241	mRNA cap guanine-N7 methyltransferase, putative	mRNA (guanine-N7-)-methyltransferase activity
0	LmjF.26.0330	0.261967	4.59667e-10	3.7587e-06	0.127	0.097	mitotic cyclin, putative	N/A
0	LmjF.09.1540	0.261788	8.21503e-11	6.71743e-07	0.149	0.116	hypothetical protein, conserved	N/A
0	LmjF.30.3130	0.260466	2.35166e-18	1.92295e-14	0.485	0.442	valyl-tRNA synthetase, putative	ATP binding;aminoacyl-tRNA editing activity;aminoacyl-tRNA ligase activity;nucleotide binding;valine-tRNA ligase activity
0	LmjF.34.3560	0.25987	2.23183e-09	1.82496e-05	0.196	0.165	Ankyrin repeats (3 copies)/Ankyrin repeats (many copies), putative	protein binding
0	LmjF.25.2140	0.25956	1.34234e-18	1.09763e-14	0.511	0.473	succinyl-CoA synthetase alpha subunit, putative	catalytic activity
0	LmjF.15.1380	0.258692	3.92999e-14	3.21355e-10	0.397	0.361	nucleolar RNA binding protein, putative	N/A
0	LmjF.20.1070	0.258606	1.4227e-11	1.16334e-07	0.139	0.105	hypothetical protein, unknown function	N/A
0	LmjF.35.1460	0.257957	9.34102e-11	7.63815e-07	0.301	0.269	hypothetical protein, conserved	N/A
0	LmjF.31.1070	0.257561	1.08869e-20	8.90219e-17	0.544	0.505	biotin/lipoate protein ligase-like protein	biotin-[acetyl-CoA-carboxylase] ligase activity
0	LmjF.33.2060	0.256813	1.07909e-10	8.82372e-07	0.341	0.312	hypothetical protein, conserved	N/A
0	LmjF.35.4050	0.256454	1.34128e-10	1.09677e-06	0.178	0.144	kinetoplastid kinetochore protein 3, putative	ATP binding;protein kinase activity
0	LmjF.18.0940	0.256025	4.54542e-11	3.71679e-07	0.244	0.207	Nrap protein, putative	N/A
0	LmjF.29.0030	0.255546	3.23994e-09	2.6493e-05	0.126	0.098	ribosomal protein L3-like protein	structural constituent of ribosome
0	LmjF.18.0820	0.255356	2.833e-09	2.31654e-05	0.258	0.228	hypothetical protein, conserved	protein kinase binding;protein kinase regulator activity;ribosome binding
0	LmjF.19.1160	0.25468	1.64589e-27	1.34584e-23	0.62	0.571	hypothetical protein, conserved	N/A
0	LmjF.03.0690	0.254544	1.98621e-14	1.62413e-10	0.384	0.347	DEAD/DEAH box helicase, putative	ATP binding;nucleic acid binding
0	LmjF.04.1220	0.254299	8.17406e-09	6.68392e-05	0.237	0.209	hypothetical protein, conserved	N/A
0	LmjF.13.1660	0.254242	3.04141e-12	2.48696e-08	0.428	0.403	chaperonin TCP20, putative	ATP binding;unfolded protein binding
0	LmjF.24.1210	0.253695	8.66274e-08	0.000708352	0.222	0.197	Eukaryotic translation initiation factor 1, putative	translation initiation factor activity
0	LmjF.21.1710	0.253314	7.12819e-10	5.82872e-06	0.362	0.338	cytochrome c oxidase subunit VI, putative	N/A
0	LmjF.21.1770	0.252892	3.09473e-11	2.53056e-07	0.384	0.354	ATP synthase F1 subunit gamma protein, putative	proton-transporting ATP synthase activity, rotational mechanism
0	LmjF.09.1070	0.252102	3.05151e-11	2.49522e-07	0.346	0.315	eukaryotic translation initiation factor 2 subunit, putative	GTP binding;GTPase activity;tRNA binding
0	LmjF.03.0180	0.25203	9.91653e-08	0.000810875	0.136	0.111	zinc-finger of acetyl-transferase ESCO, putative	N/A
0	LmjF.33.2610	0.251389	8.49873e-10	6.94941e-06	0.198	0.164	Mitochondrial-processing peptidase subunit alpha	metal ion binding
0	LmjF.27.2330	0.251131	5.08528e-08	0.000415823	0.326	0.305	GTP binding protein, putative	GTP binding
0	LmjF.36.0700	0.250842	5.7533e-10	4.70447e-06	0.134	0.104	MP18 RNA editing complex protein, putative	single-stranded DNA binding
0	LmjF.15.1540	0.250803	5.82535e-07	0.00476339	0.138	0.114	Radical SAM superfamily/Wyosine base formation, putative	4 iron, 4 sulfur cluster binding;catalytic activity;iron-sulfur cluster binding
0	LmjF.20.0560	0.250595	8.41301e-07	0.00687932	0.213	0.19	cytidine triphosphate synthase, putative	CTP synthase activity
0	LmjF.23.1710	0.250373	1.77046e-09	1.44771e-05	0.168	0.136	Meckel syndrome type 1 protein, putative	N/A
0	LmjF.28.1370	0.250054	1.6083e-09	1.31511e-05	0.24	0.207	haloacid dehalogenase-like hydrolase, putative	hydrolase activity
0	LmjF.21.1500	0.249691	5.31306e-08	0.000434449	0.207	0.18	hypothetical protein, conserved	N/A
0	LmjF.36.0570	0.248991	5.07985e-07	0.00415379	0.183	0.159	Elongation factor G1, mitochondrial, putative	GTP binding;GTPase activity;translation elongation factor activity
0	LmjF.17.0083	0.248797	6.96551e-57	5.6957e-53	0.928	0.848	elongation factor 1-alpha	GTP binding;GTPase activity;translation elongation factor activity
0	LmjF.04.0320	0.248315	3.50447e-11	2.8656e-07	0.396	0.371	beta-fructofuranosidase, putative	hydrolase activity, hydrolyzing O-glycosyl compounds
0	LmjF.20.0950	0.248225	6.62628e-10	5.41831e-06	0.201	0.168	conserved protein, unknown function	N/A
0	LmjF.04.0630	0.248098	1.31816e-09	1.07786e-05	0.354	0.329	hypothetical protein, conserved	N/A
0	LmjF.08.0900	0.248054	2.05249e-10	1.67832e-06	0.172	0.138	mitochondrial DNA polymerase beta-PAK, putative	DNA binding;DNA polymerase activity;DNA-directed DNA polymerase activity
0	LmjF.31.1650	0.24775	2.39616e-12	1.95934e-08	0.369	0.335	MYND finger, putative	N/A
0	LmjF.20.0870	0.247065	4.04864e-06	0.0331057	0.138	0.116	ATP-dependent RNA helicase, putative	ATP binding;nucleic acid binding
0	LmjF.30.3730	0.245747	2.78609e-09	2.27818e-05	0.223	0.191	60S acidic ribosomal protein P2, putative	structural constituent of ribosome
0	LmjF.24.1630	0.245137	2.91992e-15	2.38762e-11	0.45	0.416	Succinate dehydrogenase [ubiquinone] flavoprotein subunit, mitochondrial	flavin adenine dinucleotide binding;oxidoreductase activity;oxidoreductase activity, acting on the CH-CH group of donors
0	LmjF.32.0440	0.245062	7.8019e-09	6.37961e-05	0.277	0.25	Protein of unknown function (DUF1279), putative	protein binding
0	LmjF.07.0100	0.244501	1.20894e-07	0.000988548	0.296	0.276	metallo-peptidase, Clan ME, Family M16C	metal ion binding
0	LmjF.14.0590	0.24387	4.06767e-06	0.0332613	0.141	0.119	hypothetical protein, conserved	N/A
0	LmjF.21.1330	0.243794	6.02948e-09	4.9303e-05	0.274	0.245	RecF/RecN/SMC N terminal domain/SMC proteins Flexible Hinge Domain, putative	ATP binding;protein binding
0	LmjF.36.4040	0.243073	3.33159e-11	2.72424e-07	0.331	0.299	hypothetical protein, conserved	protein binding
0	LmjF.25.0350	0.242405	2.2241e-08	0.000181864	0.167	0.139	Protein of unknown function (DUF1308), putative	N/A
0	LmjF.34.3130	0.24236	1.55544e-06	0.0127188	0.205	0.183	Present in the outer mitochondrial membrane proteome 28	N/A
0	LmjF.35.2630	0.242139	1.68619e-07	0.0013788	0.18	0.154	PHD-like zinc-binding domain containing protein, putative	N/A
0	LmjF.15.0270	0.241685	4.95871e-08	0.000405473	0.247	0.22	replication Factor A 28 kDa subunit, putative	DNA binding;nucleic acid binding
0	LmjF.36.1340	0.241671	2.53439e-07	0.00207237	0.236	0.21	N-acetyltransferase subunit Nat1, putative	protein binding
0	LmjF.13.0080	0.241551	8.66582e-09	7.08604e-05	0.336	0.313	mitochondrial DNA polymerase I protein B, putative	DNA binding;DNA-directed DNA polymerase activity;nucleic acid binding
0	LmjF.30.1530	0.241403	4.34353e-09	3.5517e-05	0.15	0.12	hypothetical protein, conserved	N/A
0	LmjF.36.3790	0.241242	1.38589e-09	1.13324e-05	0.146	0.115	hypothetical protein, conserved	protein binding
0	LmjF.33.1630	0.241032	2.214e-07	0.00181039	0.276	0.254	cyclophilin 4, putative	peptidyl-prolyl cis-trans isomerase activity
0	LmjF.05.0550	0.240979	1.27636e-06	0.0104368	0.174	0.151	cdc2-related kinase 2, putative	ATP binding;protein kinase activity
0	LmjF.24.0740	0.240313	1.94374e-07	0.0015894	0.158	0.133	hypothetical protein, conserved	N/A
0	LmjF.26.1230	0.239058	1.73005e-08	0.000141466	0.282	0.255	hypothetical protein, conserved	N/A
0	LmjF.36.1330	0.238428	5.23339e-09	4.27934e-05	0.107	0.08	heat shock protein, putative	N/A
0	LmjF.32.3430	0.237563	1.6929e-06	0.0138429	0.186	0.163	Uncharacterised protein family UPF0564, putative	N/A
0	LmjF.06.0280	0.236758	5.47181e-11	4.4743e-07	0.252	0.215	hypothetical protein, conserved	protein binding
0	LmjF.24.1920	0.236722	2.55829e-07	0.00209191	0.172	0.145	hypothetical protein, conserved	N/A
0	LmjF.33.0490	0.236506	1.05274e-07	0.000860828	0.154	0.127	hypothetical protein, conserved	N/A
0	LmjF.35.4360	0.236457	5.79299e-10	4.73693e-06	0.269	0.234	DNA polymerase epsilon catalytic subunit, putative	DNA binding;DNA-directed DNA polymerase activity;nucleic acid binding;nucleotide binding;zinc ion binding
0	LmjF.12.0550	0.236022	1.35824e-08	0.000111063	0.161	0.131	hypothetical protein, unknown function	N/A
0	LmjF.27.0260	0.235759	9.33339e-08	0.000763191	0.146	0.119	hypothetical protein, conserved	N/A
0	LmjF.30.1250	0.235697	3.42391e-12	2.79973e-08	0.36	0.328	pyridoxal kinase, putative	pyridoxal kinase activity
0	LmjF.36.6640	0.235547	1.09693e-07	0.00089696	0.181	0.154	hypothetical protein, conserved	N/A
0	LmjF.16.0660	0.23523	1.66535e-06	0.0136175	0.136	0.113	hypothetical protein, conserved	N/A
0	LmjF.31.2980	0.23511	1.79872e-14	1.47082e-10	0.367	0.324	hypothetical protein, conserved	N/A
0	LmjF.14.0520	0.235071	1.53742e-07	0.00125715	0.135	0.11	hypothetical protein, conserved	N/A
0	LmjF.11.0820	0.234653	1.44192e-16	1.17905e-12	0.522	0.485	hypothetical protein, conserved	N/A
0	LmjF.34.2840	0.234238	5.9824e-07	0.00489181	0.219	0.195	selenocysteine-specific elongation factor, putative	GTP binding;GTPase activity
0	LmjF.17.0720	0.23419	1.73253e-08	0.000141669	0.123	0.096	hypothetical protein, conserved	N/A
0	LmjF.25.1440	0.234151	3.51157e-06	0.0287141	0.14	0.118	hypothetical protein, conserved	nucleic acid binding
0	LmjF.17.0280	0.233773	7.95888e-07	0.00650798	0.26	0.24	histone H2A variant Z	DNA binding;protein heterodimerization activity
0	LmjF.15.1560	0.233373	4.73953e-09	3.87551e-05	0.311	0.284	condensin subunit 1, putative	N/A
0	LmjF.36.1660	0.233286	5.36465e-08	0.000438668	0.237	0.209	tRNA pseudouridine synthase A, putative	RNA binding;pseudouridine synthase activity
0	LmjF.23.1160	0.23296	1.16854e-08	9.55515e-05	0.102	0.076	hypothetical protein, conserved	N/A
0	LmjF.12.0610	0.232491	3.71e-09	3.03367e-05	0.221	0.188	TPR repeat, putative	protein binding
0	LmjF.13.0640	0.232334	2.65149e-07	0.00216812	0.219	0.192	hypothetical protein, conserved	N/A
0	LmjF.12.0290	0.232209	1.64798e-07	0.00134755	0.199	0.172	hypothetical protein, unknown function	N/A
0	LmjF.29.0200	0.231878	2.19925e-08	0.000179832	0.25	0.222	SNF2 family N-terminal domain/Helicase conserved C-terminal domain containing protein, putative	ATP binding
0	LmjF.22.1000	0.231834	2.57147e-07	0.00210269	0.186	0.16	hypothetical protein, conserved	N/A
0	LmjF.25.0620	0.231619	7.15824e-07	0.00585329	0.254	0.231	RNA polymerase I second largest subunit, putative	DNA binding;DNA-directed 5'-3' RNA polymerase activity;ribonucleoside binding
0	LmjF.36.3870	0.231469	1.53596e-09	1.25595e-05	0.196	0.163	hypothetical protein, conserved	N/A
0	LmjF.34.3440	0.231177	1.6396e-09	1.3407e-05	0.256	0.224	DNA topoisomerase IB, large subunit	DNA binding;DNA topoisomerase type I (single strand cut, ATP-independent) activity
0	LmjF.14.0170	0.230587	5.29428e-12	4.32913e-08	0.106	0.074	hypothetical protein, conserved	N/A
0	LmjF.31.2860	0.230556	5.66334e-10	4.63091e-06	0.193	0.158	tousled-like kinase II, putative	ATP binding;protein kinase activity
0	LmjF.09.0050	0.230322	9.8855e-08	0.000808338	0.203	0.175	endonuclease III, putative	4 iron, 4 sulfur cluster binding;DNA N-glycosylase activity;DNA binding;DNA-(apurinic or apyrimidinic site) endonuclease activity;catalytic activity
0	LmjF.35.4440	0.230017	2.89685e-09	2.36875e-05	0.208	0.175	hypothetical protein, conserved	N/A
0	LmjF.22.0170	0.229829	6.85914e-08	0.000560872	0.289	0.266	hypothetical protein, conserved	calcium ion binding
0	LmjF.26.1240	0.229539	1.17288e-16	9.59068e-13	0.524	0.49	heat shock protein 70-related protein	N/A
0	LmjF.33.0450	0.22931	9.12628e-07	0.00746256	0.157	0.133	hypothetical protein, conserved	N/A
0	LmjF.32.1000	0.229109	1.22288e-19	9.99947e-16	0.605	0.568	chaperonin containing t-complex protein, putative	ATP binding;unfolded protein binding
0	LmjF.21.1552	0.228484	1.5277e-17	1.2492e-13	0.544	0.508	ATP-dependent RNA helicase SUB2, putative	ATP binding;helicase activity;nucleic acid binding
0	LmjF.25.0220	0.228212	8.31364e-07	0.00679806	0.183	0.159	hypothetical protein, conserved	N/A
0	LmjF.21.1310	0.228133	3.23281e-06	0.0264347	0.137	0.115	hypothetical protein, conserved	N/A
0	LmjF.22.1480	0.227797	6.09133e-07	0.00498088	0.139	0.115	Mitochondrial glycoprotein, putative	N/A
0	LmjF.27.1030	0.227337	3.69934e-06	0.0302495	0.126	0.105	hypothetical protein, conserved	N/A
0	LmjF.27.2400	0.227064	2.35719e-22	1.92748e-18	0.674	0.638	heat shock protein DNAJ, putative	ATP binding;heat shock protein binding;unfolded protein binding
0	LmjF.34.0920	0.226345	2.00696e-06	0.0164109	0.152	0.129	hypothetical protein, conserved	N/A
0	LmjF.27.1310	0.226042	4.76474e-07	0.00389613	0.265	0.244	arginyl-tRNA synthetase, putative	ATP binding;aminoacyl-tRNA ligase activity;arginine-tRNA ligase activity;nucleotide binding
0	LmjF.13.0180	0.225951	6.36083e-09	5.20125e-05	0.125	0.097	Tetratricopeptide repeat, putative	protein binding
0	LmjF.08.1140	0.225184	5.36834e-09	4.38969e-05	0.114	0.086	suppressive immunomodulating factor, putative	protein binding
0	LmjF.15.1440	0.225121	2.16455e-06	0.0176995	0.268	0.25	glutaminyl-tRNA synthetase, putative	ATP binding;aminoacyl-tRNA ligase activity;glutamine-tRNA ligase activity;nucleotide binding
0	LmjF.28.1780	0.224582	6.09475e-07	0.00498368	0.211	0.186	DNA topoisomerase III, putative	DNA binding;DNA topoisomerase activity;DNA topoisomerase type I (single strand cut, ATP-independent) activity
0	LmjF.21.1280	0.224156	2.5588e-09	2.09233e-05	0.15	0.119	hypothetical protein, conserved	N/A
0	LmjF.09.0930	0.223731	6.1071e-25	4.99378e-21	0.686	0.63	calmodulin, putative	calcium ion binding
0	LmjF.26.2440	0.222467	3.46139e-06	0.0283038	0.12	0.099	Aurora kinase 3, putative	ATP binding;protein kinase activity
0	LmjF.26.1665	0.222252	4.42554e-06	0.0361876	0.231	0.209	hypothetical protein, conserved	N/A
0	LmjF.29.2140	0.22207	3.12156e-07	0.0025525	0.27	0.248	C-8 sterol isomerase-like protein	N/A
0	LmjF.35.2140	0.222019	9.23502e-07	0.00755148	0.109	0.087	hypothetical protein, conserved	N/A
0	LmjF.34.1555	0.221618	1.2937e-06	0.0105786	0.151	0.127	ubiquitin-conjugating enzyme E2, putative	N/A
0	LmjF.03.0590	0.221201	2.16987e-06	0.0177431	0.191	0.167	DNA repair helicase, putative	ATP binding;DNA binding;DNA helicase activity;helicase activity;hydrolase activity, acting on acid anhydrides, in phosphorus-containing anhydrides;nucleic acid binding
0	LmjF.35.2760	0.220924	1.77186e-07	0.00144885	0.118	0.094	hypothetical protein, conserved	GTP binding
0	LmjF.31.2310	0.220714	5.3634e-25	4.38565e-21	0.715	0.666	3'-nucleotidase/nuclease precursor, putative	endonuclease activity;hydrolase activity, acting on ester bonds;nucleic acid binding
0	LmjF.29.1050	0.220694	5.31767e-08	0.000434826	0.189	0.16	KU70 protein, putative	DNA binding;damaged DNA binding;telomeric DNA binding
0	LmjF.19.0020	0.220055	8.88655e-12	7.26654e-08	0.505	0.486	hypothetical protein, conserved	N/A
0	LmjF.34.0860	0.219853	1.75078e-34	1.43161e-30	0.893	0.844	60S ribosomal protein L13a, putative	structural constituent of ribosome
0	LmjF.36.2920	0.219631	3.07899e-08	0.000251769	0.111	0.085	PHF5-like protein, putative	N/A
0	LmjF.36.6130	0.219149	1.12284e-08	9.18147e-05	0.281	0.251	hypothetical protein, conserved	N/A
0	LmjF.25.1015	0.219138	1.44289e-06	0.0117985	0.264	0.243	protein transport protein Sec61 gamma subunit, putative	P-P-bond-hydrolysis-driven protein transmembrane transporter activity
0	LmjF.36.6480	0.21908	1.22709e-09	1.00339e-05	0.333	0.304	histidine secretory acid phosphatase, putative	N/A
0	LmjF.31.3030	0.218996	1.99824e-14	1.63396e-10	0.337	0.29	hypothetical protein, unknown function	N/A
0	LmjF.27.0290	0.218239	9.36974e-07	0.00766164	0.264	0.242	acyl carrier protein, mitochondrial, putative	N/A
0	LmjF.28.2640	0.217964	1.88279e-08	0.000153955	0.149	0.12	molybdenum cofactor biosynthesis protein, putative	N/A
0	LmjF.28.0140	0.217862	4.72077e-14	3.86018e-10	0.517	0.482	pantothenate kinase subunit, putative	ATP binding;pantothenate kinase activity
0	LmjF.33.2660	0.217589	1.1484e-08	9.39044e-05	0.15	0.121	hypothetical protein, conserved	nucleic acid binding;zinc ion binding
0	LmjF.14.0150	0.217308	6.48643e-07	0.00530396	0.165	0.14	60S ribosomal protein, putative	structural constituent of ribosome
0	LmjF.16.1520	0.217162	1.13025e-06	0.00924206	0.153	0.129	hypothetical protein, conserved	N/A
0	LmjF.34.3600	0.216971	3.86005e-07	0.00315636	0.159	0.133	adenosine kinase-like protein	adenosine kinase activity;phosphotransferase activity, alcohol group as acceptor
0	LmjF.31.0670	0.215783	6.79129e-12	5.55324e-08	0.309	0.268	hypothetical protein, conserved	N/A
0	LmjF.25.2050	0.215773	8.12007e-08	0.000663978	0.247	0.219	helicase-like protein, putative	ATP binding
0	LmjF.17.0270	0.215659	1.29367e-08	0.000105783	0.305	0.277	NADH-ubiquinone oxidoreductase, mitochondrial, putative	oxidoreductase activity
0	LmjF.26.0150	0.215584	1.05096e-07	0.000859367	0.149	0.122	Mini-chromosome maintenance complex-binding protein	N/A
0	LmjF.10.1110	0.215396	1.19782e-09	9.79461e-06	0.391	0.368	PAB1-binding protein , putative	N/A
0	LmjF.32.0190	0.215294	7.41772e-08	0.000606547	0.148	0.12	hypothetical protein, conserved	N/A
0	LmjF.36.1060	0.215281	3.87908e-08	0.000317193	0.228	0.199	ISWI complex protein	N/A
0	LmjF.03.0980	0.215009	4.34898e-10	3.55616e-06	0.4	0.376	eukaryotic translation initiation factor 2 subunit alpha	RNA binding;nucleic acid binding;translation initiation factor activity
0	LmjF.28.2780	0.215001	2.58062e-60	2.11018e-56	0.955	0.897	heat-shock protein hsp70, putative	N/A
0	LmjF.36.1770	0.214296	2.06625e-10	1.68958e-06	0.472	0.454	hypothetical protein, conserved	N/A
0	LmjF.31.1580	0.21245	4.69117e-06	0.0383597	0.123	0.102	hypothetical protein, conserved	N/A
0	LmjF.34.3430	0.212073	8.14602e-07	0.006661	0.293	0.271	cleavage and polyadenylation specificity factor, putative	N/A
0	LmjF.10.0945	0.211907	1.04028e-06	0.00850634	0.245	0.222	Archaic translocase of outer membrane 12 kDa subunit, putative	N/A
0	LmjF.12.0250	0.211794	7.92093e-11	6.47695e-07	0.437	0.409	cysteinyl-tRNA synthetase, putative	ATP binding;aminoacyl-tRNA ligase activity;cysteine-tRNA ligase activity;nucleotide binding
0	LmjF.12.0670	0.211465	1.48983e-17	1.21824e-13	0.62	0.583	cytochrome oxidase subunit IV, putative	N/A
0	LmjF.31.1800	0.211004	2.35555e-28	1.92613e-24	0.786	0.723	amino acid permease	N/A
0	LmjF.30.1620	0.209927	9.00785e-07	0.00736572	0.174	0.149	hypothetical protein, conserved	N/A
0	LmjF.34.3980	0.20843	3.98525e-06	0.0325874	0.307	0.291	nucleolar protein family a member-like protein	N/A
0	LmjF.27.0880	0.207862	5.21894e-10	4.26753e-06	0.391	0.364	2-oxoglutarate dehydrogenase subunit, putative	oxidoreductase activity, acting on the aldehyde or oxo group of donors, disulfide as acceptor;oxoglutarate dehydrogenase (succinyl-transferring) activity;thiamine pyrophosphate binding
0	LmjF.35.1300	0.20755	5.22877e-21	4.27557e-17	0.754	0.717	ubiquitin-conjugating enzyme E2, putative	N/A
0	LmjF.20.0160	0.206353	1.9726e-06	0.01613	0.116	0.094	wd40 repeat domain-containing protein	protein binding
0	LmjF.06.0830	0.205615	1.2191e-13	9.96861e-10	0.681	0.642	lipin, putative	N/A
0	LmjF.01.0770	0.204922	4.83357e-14	3.95241e-10	0.586	0.563	Eukaryotic initiation factor 4A-1	ATP binding;helicase activity;nucleic acid binding
0	LmjF.19.0790	0.204814	1.15508e-08	9.44506e-05	0.257	0.226	signal recognition particle protein, putative	7S RNA binding;protein binding
0	LmjF.29.2010	0.204443	5.72849e-07	0.00468418	0.118	0.095	hypothetical protein, conserved	protein binding
0	LmjF.09.0290	0.203977	2.5348e-06	0.020727	0.103	0.082	kinesin, putative	ATP binding;microtubule binding;microtubule motor activity
0	LmjF.36.1790	0.203499	2.56754e-06	0.0209948	0.26	0.238	5'-3' exoribonuclease D, putative	exonuclease activity;nucleic acid binding
0	LmjF.11.1380	0.203122	2.52979e-07	0.00206861	0.142	0.117	Variant SH3 domain containing protein, putative	protein binding
0	LmjF.10.0890	0.202975	1.88703e-06	0.0154303	0.317	0.299	FKBP-type peptidyl-prolyl cis-trans isomerase, putative	peptidyl-prolyl cis-trans isomerase activity
0	LmjF.32.0990	0.202704	2.08071e-06	0.0170139	0.218	0.194	WD domain, G-beta repeat, putative	protein binding
0	LmjF.32.3820	0.201964	4.50574e-06	0.0368434	0.108	0.087	hypothetical protein, conserved	N/A
0	LmjF.14.0280	0.200448	2.51118e-06	0.0205339	0.286	0.267	Nucleus and spindle associated protein 3, putative	nucleic acid binding;zinc ion binding
0	LmjF.36.3070	0.199768	3.72018e-07	0.00304199	0.37	0.352	fibrillarin	RNA binding;methyltransferase activity
0	LmjF.15.1470	0.199519	1.69592e-09	1.38675e-05	0.438	0.414	ribosomal protein S6, putative	RNA binding
0	LmjF.36.3780	0.199143	4.62032e-07	0.00377803	0.297	0.276	Spindle pole body protein 1, putative	N/A
0	LmjF.22.0090	0.197796	2.24794e-07	0.00183814	0.141	0.115	cap guanylyltransferase-methyltransferase 1	mRNA (guanine-N7-)-methyltransferase activity
0	LmjF.34.2210	0.197652	2.62254e-06	0.0214445	0.307	0.288	hypothetical protein, unknown function	N/A
0	LmjF.36.6200	0.197501	4.31277e-06	0.0352655	0.218	0.195	hypothetical protein, conserved	oxidoreductase activity
0	LmjF.21.1760	0.196029	2.28231e-10	1.86624e-06	0.507	0.488	centromere/microtubule binding protein cbf5, putative	RNA binding;pseudouridine synthase activity
0	LmjF.06.0620	0.1953	1.16868e-06	0.00955628	0.297	0.275	Putative Phosphatase/Protein of unknown function DUF89, putative	phosphatase activity
0	LmjF.28.1280	0.195124	1.21702e-06	0.00995157	0.254	0.23	phenylalanine-4-hydroxylase	iron ion binding;monooxygenase activity;oxidoreductase activity, acting on paired donors, with incorporation or reduction of molecular oxygen, reduced pteridine as one donor, and incorporation of one atom of oxygen
0	LmjF.35.0290	0.194036	1.62598e-07	0.00132956	0.289	0.264	hypothetical protein, conserved	oxidoreductase activity
0	LmjF.11.0440	0.193715	3.05914e-06	0.0250146	0.116	0.094	hypothetical protein, conserved	protein binding
0	LmjF.21.0790	0.192523	5.39659e-06	0.0441279	0.126	0.104	ras-related protein Rab21, putative	GTP binding;GTPase activity
0	LmjF.36.1610	0.192433	5.60843e-35	4.58601e-31	0.912	0.858	universal minicircle sequence binding protein, putative	nucleic acid binding;zinc ion binding
0	LmjF.35.2740	0.191981	1.51114e-08	0.000123566	0.409	0.387	galactokinase-like protein	ATP binding;galactokinase activity;kinase activity;phosphotransferase activity, alcohol group as acceptor
0	LmjF.30.0760	0.191456	9.65953e-07	0.0078986	0.315	0.298	hypothetical protein, conserved	protein binding
0	LmjF.33.2440	0.191145	5.65299e-14	4.62245e-10	0.621	0.594	hypothetical protein, conserved	N/A
0	LmjF.11.1170	0.18917	2.15381e-08	0.000176117	0.46	0.45	eukaryotic release factor 3, putative	GTP binding;GTPase activity
0	LmjF.36.5840	0.188703	1.79613e-06	0.014687	0.101	0.08	hypothetical protein, conserved	N/A
0	LmjF.35.3780	0.18809	3.1978e-23	2.61484e-19	0.802	0.75	60S ribosomal protein L27A/L29, putative	structural constituent of ribosome
0	LmjF.01.0250	0.188034	5.00675e-06	0.0409402	0.13	0.107	Right handed beta helix region, putative	N/A
0	LmjF.24.0760	0.187107	3.53905e-12	2.89388e-08	0.541	0.518	DNA repair and recombination protein RAD54, putative	ATP binding
0	LmjF.32.2150	0.186383	1.13602e-07	0.000928921	0.395	0.377	hypothetical protein, conserved	N/A
0	LmjF.25.1420	0.186355	2.25509e-12	1.84399e-08	0.543	0.519	GTP-binding protein, putative	GTP binding;GTPase activity
0	LmjF.33.3210	0.186202	1.31323e-06	0.0107382	0.329	0.31	beta prime cop protein, putative	protein binding;structural molecule activity
0	LmjF.24.0850	0.183647	3.8799e-13	3.17259e-09	0.532	0.504	triosephosphate isomerase	catalytic activity;triose-phosphate isomerase activity
0	LmjF.20.0480	0.181811	3.58455e-06	0.0293109	0.118	0.096	kinetoplast ribosomal PPR-repeat containing protein 3, putative	protein binding
0	LmjF.36.6060	0.181688	2.86156e-08	0.00023399	0.419	0.403	eukaryotic translation initiation factor 4 gamma 4	RNA binding;protein binding
0	LmjF.21.1820	0.179788	1.33525e-07	0.00109183	0.38	0.357	60S ribosomal protein L37a, putative	structural constituent of ribosome
0	LmjF.31.2350	0.176504	2.95145e-08	0.00024134	0.451	0.435	Symplekin tight junction protein C terminal, putative	N/A
0	LmjF.36.0070	0.176388	4.52933e-12	3.70363e-08	0.574	0.548	stress-inducible protein STI1 homolog	protein binding
0	LmjF.24.0390	0.17635	3.20645e-06	0.0262191	0.226	0.201	hypothetical protein, conserved	N/A
0	LmjF.14.0690	0.17303	9.02914e-09	7.38313e-05	0.515	0.501	fatty acid elongase, putative	N/A
0	LmjF.13.1100	0.172776	2.6346e-08	0.000215431	0.447	0.427	leucyl-tRNA synthetase, putative	ATP binding;aminoacyl-tRNA editing activity;aminoacyl-tRNA ligase activity;leucine-tRNA ligase activity;nucleotide binding
0	LmjF.28.2430	0.169811	2.03121e-06	0.0166092	0.411	0.399	Vacuolar proton pump subunit B, putative	ATP binding
0	LmjF.05.0450	0.167456	4.04541e-06	0.0330793	0.387	0.374	hypothetical protein, conserved	N/A
0	LmjF.13.1480	0.163184	1.46435e-06	0.011974	0.479	0.474	Ran-binding protein 1, putative	N/A
0	LmjF.25.0910	0.161872	8.05185e-17	6.584e-13	0.765	0.717	cyclophilin a, putative	peptidyl-prolyl cis-trans isomerase activity
0	LmjF.32.2770	0.157784	3.08859e-06	0.0252554	0.109	0.087	mucin-like protein, putative	N/A
0	LmjF.25.1190	0.157773	1.35861e-12	1.11094e-08	0.709	0.677	ribosomal protein S25	N/A
0	LmjF.33.3230	0.156678	3.71223e-07	0.00303549	0.411	0.393	60S ribosomal protein L44	structural constituent of ribosome
0	LmjF.31.1780	0.155897	2.16053e-07	0.00176667	0.511	0.496	Sphingosine N-acyltransferase, putative	N/A
0	LmjF.29.2470	0.154687	8.34326e-19	6.82229e-15	0.853	0.805	60S ribosomal protein L13, putative	structural constituent of ribosome
0	LmjF.35.0270	0.150046	4.7142e-06	0.0385481	0.425	0.411	hypothetical protein, conserved	N/A
0	LmjF.32.0880	0.147792	3.91708e-10	3.20299e-06	0.706	0.678	60S ribosomal protein L18a, putative	structural constituent of ribosome
0	LmjF.22.0030	0.143741	6.54125e-13	5.34878e-09	0.756	0.718	60S ribosomal protein L11 (L5, L16)	structural constituent of ribosome
0	LmjF.25.1090	0.137646	3.80183e-06	0.0310876	0.47	0.456	magnesium transporter protein 2	magnesium ion transmembrane transporter activity;metal ion transmembrane transporter activity
0	LmjF.36.3390	0.136765	3.53379e-09	2.88958e-05	0.527	0.503	ribosomal protein L29, putative	structural constituent of ribosome
0	LmjF.35.2190	0.132168	6.42919e-08	0.000525715	0.576	0.542	60S ribosomal protein L12, putative	structural constituent of ribosome
0	LmjF.36.5850	0.130193	2.18777e-22	1.78894e-18	0.897	0.848	flagellum targeting protein kharon1, putative	N/A
0	LmjF.35.3230	0.129982	1.21541e-06	0.00993838	0.575	0.565	cystathione gamma lyase, putative	catalytic activity;pyridoxal phosphate binding
0	LmjF.36.3750	0.127364	7.32478e-08	0.000598947	0.467	0.44	40S ribosomal protein S27-1, putative	structural constituent of ribosome
0	LmjF.25.0490	0.127285	1.0166e-08	8.31277e-05	0.658	0.64	RNA-binding protein UBP1, putative	RNA binding;nucleic acid binding
0	LmjF.36.0930	0.121565	2.17795e-09	1.78091e-05	0.713	0.682	40S ribosomal protein S18, putative	RNA binding;nucleic acid binding;structural constituent of ribosome
0	LmjF.26.0880	0.120695	1.4922e-10	1.22017e-06	0.832	0.794	40S ribosomal protein S16, putative	structural constituent of ribosome
0	LmjF.35.2210	0.114649	1.27005e-10	1.03852e-06	0.845	0.796	kinetoplastid membrane protein-11	N/A
0	LmjF.27.1390	0.113733	9.40941e-13	7.69408e-09	0.938	0.908	60S acidic ribosomal protein P0, putative	N/A
0	LmjF.22.0460	0.107758	2.16695e-07	0.00177192	0.728	0.697	40S ribosomal protein S15, putative	RNA binding;structural constituent of ribosome
0	LmjF.36.2360	0.103702	2.09941e-09	1.71669e-05	0.775	0.742	tyrosine aminotransferase	catalytic activity;pyridoxal phosphate binding;transaminase activity
0	LmjF.22.0730	0.101267	3.16225e-07	0.00258577	0.729	0.709	cytoskeleton associated protein, putative	N/A
1	LmjF.31.1440	2.17512	0	0	0.99	0.828	hypothetical protein, unknown function (pseudogene)	N/A
1	LmjF.26.2680	1.70403	0	0	0.83	0.393	hypothetical protein, unknown function	N/A
1	LmjF.20.1185	1.50862	0	0	0.426	0.124	calpain-like cysteine peptidase, putative	calcium-dependent cysteine-type endopeptidase activity
1	LmjF.12.0980	1.2887	1.681e-233	1.37455e-229	0.758	0.572	promastigote surface antigen protein 2 PSA2	N/A
1	LmjF.10.0540	1.16853	2.37982e-303	1.94598e-299	0.713	0.433	hypothetical protein, unknown function	N/A
1	LmjF.35.0500	1.14602	1.44995e-271	1.18562e-267	0.676	0.396	proteophosphoglycan ppg3, putative	protein binding;transmembrane signaling receptor activity
1	LmjF.12.1090	1.14252	2.09517e-212	1.71322e-208	0.801	0.654	surface antigen protein, putative	N/A
1	LmjF.11.1040	1.1139	1.56407e-281	1.27894e-277	0.604	0.312	hypothetical protein, conserved	N/A
1	LmjF.34.0190	1.02559	1.50329e-187	1.22924e-183	0.431	0.203	Domain of unknown function (DUF1935), putative	N/A
1	LmjF.31.0390	1.00557	1.28338e-202	1.04942e-198	0.5	0.257	Calpain-like protein 2	calcium-dependent cysteine-type endopeptidase activity
1	LmjF.29.2270	1.00119	6.95369e-167	5.68603e-163	0.271	0.096	acyltransferase, putative	transferase activity, transferring acyl groups
1	LmjF.03.0010	0.991355	6.52647e-193	5.3367e-189	0.296	0.101	hypothetical protein	N/A
1	LmjF.05.1215	0.942943	5.36436e-158	4.38644e-154	0.493	0.282	surface antigen-like protein	N/A
1	LmjF.26.2570	0.909922	5.81189e-253	4.75238e-249	0.757	0.509	Serine/threonine-protein kinase NEK15, putative	ATP binding;protein kinase activity
1	LmjF.32.3870	0.900191	8.74108e-154	7.14758e-150	0.402	0.2	myosin XXI, putative	ATP binding;motor activity;protein binding
1	LmjF.16.0470	0.899269	6.84557e-131	5.59762e-127	0.389	0.205	hypothetical protein, conserved	N/A
1	LmjF.23.0360	0.893206	5.37956e-158	4.39887e-154	0.55	0.335	NADP-dependent alcohol dehydrogenase, putative	oxidoreductase activity;zinc ion binding
1	LmjF.12.1140	0.887294	2.01836e-147	1.65042e-143	0.326	0.142	n-ethylmaleimide reductase-like protein	FMN binding;catalytic activity;oxidoreductase activity
1	LmjF.34.2290	0.879305	1.14362e-138	9.35142e-135	0.37	0.181	twinfilin	actin binding
1	LmjF.31.2800	0.822623	7.43707e-125	6.08129e-121	0.287	0.125	hypothetical protein, unknown function	N/A
1	LmjF.33.2300	0.820024	4.63762e-146	3.79218e-142	0.552	0.349	udp-glc 4'-epimerase, putative	UDP-glucose 4-epimerase activity;catalytic activity
1	LmjF.24.1410	0.812845	6.95681e-98	5.68858e-94	0.253	0.117	hypothetical predicted transmembrane protein	N/A
1	LmjF.31.1445	0.809567	1.04508e-137	8.54564e-134	0.756	0.623	hypothetical protein, unknown function	N/A
1	LmjF.32.1950	0.807113	5.59739e-129	4.57699e-125	0.166	0.047	hypothetical protein, conserved	N/A
1	LmjF.34.1270	0.806772	6.69218e-120	5.47219e-116	0.208	0.075	Protein of unknown function (DUF3595), putative	mechanosensitive ion channel activity
1	LmjF.26.1980	0.795875	1.27131e-130	1.03955e-126	0.411	0.218	hypothetical protein, conserved	N/A
1	LmjF.10.0370	0.793723	3.43288e-152	2.80706e-148	0.462	0.245	folate/biopterin transporter, putative	N/A
1	LmjF.04.0200	0.785013	6.55915e-106	5.36342e-102	0.4	0.23	surface antigen-like protein	N/A
1	LmjF.06.0030	0.771655	2.26495e-196	1.85205e-192	0.801	0.644	WD domain, G-beta repeat, putative	protein binding
1	LmjF.33.0520	0.761107	1.17265e-117	9.58872e-114	0.312	0.146	d-xylulose reductase, putative	oxidoreductase activity;zinc ion binding
1	LmjF.34.0970	0.754707	1.06534e-285	8.71129e-282	0.897	0.76	amastin-like protein	N/A
1	LmjF.27.1590	0.732274	4.03778e-103	3.30169e-99	0.308	0.152	diacylglycerol acyltransferase, putative	transferase activity, transferring acyl groups other than amino-acyl groups
1	LmjF.31.1160	0.728496	5.59174e-103	4.57236e-99	0.367	0.203	hypothetical protein, unknown function	N/A
1	LmjF.32.2250	0.728157	8.41091e-116	6.8776e-112	0.323	0.156	hypothetical protein, unknown function	N/A
1	LmjF.12.0890	0.725719	8.54895e-72	6.99048e-68	0.44	0.3	promastigote surface antigen 38S	N/A
1	LmjF.15.0520	0.723716	3.60193e-104	2.9453e-100	0.323	0.165	ecotin, putative	serine-type endopeptidase inhibitor activity
1	LmjF.31.1090	0.710445	4.93165e-117	4.03261e-113	0.326	0.156	hypothetical protein, conserved	N/A
1	LmjF.36.1530	0.698358	7.84463e-94	6.41456e-90	0.357	0.2	NEK family Serine/threonine-protein kinase, putative	ATP binding;protein kinase activity
1	LmjF.36.4200	0.688014	6.9142e-92	5.65374e-88	0.444	0.28	Arrestin (or S-antigen), N-terminal domain containing protein, putative	N/A
1	LmjF.12.1060	0.679299	4.44735e-67	3.6366e-63	0.275	0.154	surface antigen protein, putative	N/A
1	LmjF.36.4140	0.675971	1.09656e-79	8.96661e-76	0.344	0.201	Amastin surface glycoprotein, putative	N/A
1	LmjF.15.0300	0.675688	6.39297e-88	5.22753e-84	0.354	0.203	Ecotin-like protein	serine-type endopeptidase inhibitor activity
1	LmjF.28.0230	0.674582	1.59698e-77	1.30585e-73	0.324	0.186	hypothetical protein, unknown function	N/A
1	LmjF.20.1180	0.672384	7.73576e-108	6.32553e-104	0.611	0.451	calpain-like cysteine peptidase, putative	calcium-dependent cysteine-type endopeptidase activity
1	LmjF.30.2970	0.670422	4.20174e-154	3.43576e-150	0.774	0.615	glyceraldehyde 3-phosphate dehydrogenase, glycosomal	NAD binding;NADP binding;oxidoreductase activity, acting on the aldehyde or oxo group of donors, NAD or NADP as acceptor
1	LmjF.32.2290	0.669962	1.86622e-77	1.52601e-73	0.28	0.15	sphingosine-1-phosphate phosphatase, putative	N/A
1	LmjF.23.0110	0.656884	4.28522e-78	3.50403e-74	0.374	0.229	GDP-mannose pyrophosphorylase	nucleotidyltransferase activity
1	LmjF.23.0140	0.656732	6.27176e-70	5.12842e-66	0.261	0.141	Alpha/beta hydrolase family, putative	N/A
1	LmjF.11.1000	0.651982	6.33449e-110	5.17971e-106	0.577	0.398	pyruvate phosphate dikinase, putative	ATP binding;catalytic activity;kinase activity;pyruvate, phosphate dikinase activity;transferase activity, transferring phosphorus-containing groups
1	LmjF.33.3010	0.649372	5.1992e-76	4.25138e-72	0.286	0.156	hypothetical protein, conserved	N/A
1	LmjF.16.1030	0.644109	1.43848e-71	1.17625e-67	0.296	0.167	Protein of unknown function (DUF3184), putative	transferase activity, transferring phosphorus-containing groups
1	LmjF.27.1730	0.643451	1.00333e-81	8.20425e-78	0.466	0.31	Flabarin, putative	N/A
1	LmjF.21.1170	0.642292	1.89876e-87	1.55261e-83	0.228	0.102	surface antigen-like protein	protein binding
1	LmjF.33.1980	0.631576	1.01303e-72	8.28354e-69	0.259	0.137	NEK family Serine/threonine-protein kinase, putative	ATP binding;protein kinase activity
1	LmjF.35.3340	0.627957	2.47174e-127	2.02114e-123	0.746	0.606	6-phosphogluconate dehydrogenase, decarboxylating, putative	NADP binding;oxidoreductase activity;phosphogluconate dehydrogenase (decarboxylating) activity
1	LmjF.31.2000	0.626041	3.18576e-63	2.605e-59	0.381	0.251	GP63-like protein, leishmanolysin-like protein	metalloendopeptidase activity
1	LmjF.22.1150	0.615737	2.34005e-63	1.91346e-59	0.282	0.162	Protein kinase domain containing protein, putative	ATP binding;protein kinase activity
1	LmjF.33.3030	0.611582	2.59545e-64	2.1223e-60	0.324	0.198	hypothetical protein, unknown function	N/A
1	LmjF.01.0010	0.609234	4.48442e-74	3.66691e-70	0.182	0.079	Protein of unknown function (DUF2946), putative	N/A
1	LmjF.31.2115	0.608552	1.21114e-65	9.90345e-62	0.239	0.124	hypothetical protein, unknown function	N/A
1	LmjF.09.0520	0.607721	1.44454e-62	1.1812e-58	0.351	0.223	Flagellum attachment zone protein 3	N/A
1	LmjF.28.2650	0.606344	7.00663e-60	5.72932e-56	0.38	0.251	membrane-bound acid phosphatase, putative	N/A
1	LmjF.16.0490	0.601716	1.56885e-74	1.28285e-70	0.231	0.113	hypothetical protein, conserved	N/A
1	LmjF.23.1267	0.58842	3.05276e-61	2.49624e-57	0.351	0.222	hypothetical protein, unknown function	N/A
1	LmjF.31.1770	0.586973	1.33247e-69	1.08956e-65	0.316	0.185	hypothetical protein, unknown function	N/A
1	LmjF.15.0750	0.578819	5.14e-64	4.20298e-60	0.199	0.096	hypothetical protein, unknown function	N/A
1	LmjF.30.0290	0.57721	3.68137e-67	3.01026e-63	0.358	0.222	hypothetical protein, unknown function	N/A
1	LmjF.36.3940	0.576817	2.34965e-62	1.92131e-58	0.409	0.276	hypothetical protein, unknown function	N/A
1	LmjF.34.1410	0.570711	3.23401e-141	2.64445e-137	0.924	0.886	d-isomer specific 2-hydroxyacid dehydrogenase- like protein	NAD binding
1	LmjF.31.1760	0.570196	1.20109e-59	9.8213e-56	0.37	0.243	hypothetical protein, unknown function	N/A
1	LmjF.35.0460	0.562434	4.22793e-62	3.45718e-58	0.171	0.077	Generative cell specific 1 protein, putative	N/A
1	LmjF.31.1460	0.561224	1.16224e-58	9.5036e-55	0.295	0.177	surface membrane protein gp46-like protein	N/A
1	LmjF.10.0030	0.559192	1.59077e-81	1.30078e-77	0.655	0.518	phosphate-Repressible Phosphate Permease-like protein	inorganic phosphate transmembrane transporter activity
1	LmjF.33.2920	0.557366	3.63751e-53	2.97439e-49	0.29	0.178	hypothetical protein, conserved	N/A
1	LmjF.36.6290	0.555546	1.72747e-68	1.41255e-64	0.486	0.344	glucose transporter 2	transmembrane transporter activity
1	LmjF.35.4420	0.552366	1.91046e-51	1.56218e-47	0.169	0.083	mitochondrial phosphate transporter, putative	N/A
1	LmjF.14.0770	0.549725	1.91837e-49	1.56866e-45	0.261	0.158	hypothetical protein, unknown function	N/A
1	LmjF.29.1270	0.547896	5.29545e-56	4.33009e-52	0.3	0.185	Heat shock protein 100 kDa	ATP binding;ATPase activity
1	LmjF.27.0760	0.544918	7.14407e-136	5.84171e-132	0.842	0.747	ras-related protein RAB1A, putative	GTP binding;GTPase activity
1	LmjF.19.1420	0.539457	1.77844e-84	1.45423e-80	0.641	0.494	cysteine peptidase A (CPA)	cysteine-type peptidase activity
1	LmjF.28.0550	0.539062	4.38696e-57	3.58722e-53	0.402	0.276	DNA repair protein RAD51, putative	ATP binding;DNA binding;DNA-dependent ATPase activity;double-stranded DNA binding;nucleotide binding;recombinase activity;single-stranded DNA binding
1	LmjF.31.2440	0.538694	2.04359e-41	1.67104e-37	0.158	0.083	hypothetical protein, unknown function	N/A
1	LmjF.35.0710	0.536321	5.48967e-51	4.4889e-47	0.394	0.276	Endonuclease/Exonuclease/phosphatase family, putative	N/A
1	LmjF.06.0450	0.53605	2.39758e-51	1.9605e-47	0.3	0.189	hypothetical protein, unknown function	N/A
1	LmjF.34.0800	0.531798	2.17957e-58	1.78223e-54	0.28	0.163	serine/threonine-protein phosphatase PP1, putative	hydrolase activity
1	LmjF.15.0570	0.530747	6.67598e-53	5.45895e-49	0.174	0.086	hypothetical protein, unknown function	N/A
1	LmjF.06.0090	0.530469	3.93982e-52	3.22159e-48	0.38	0.261	ATP-binding cassette protein subfamily G, member 2	ATP binding;ATPase-coupled transmembrane transporter activity
1	LmjF.21.1230	0.518701	3.47071e-43	2.838e-39	0.165	0.086	WD domain, G-beta repeat, putative	protein binding
1	LmjF.19.1300	0.516798	5.49968e-49	4.49709e-45	0.362	0.247	hypothetical protein, unknown function	ATP binding;protein kinase activity
1	LmjF.34.3120	0.515655	4.65934e-42	3.80994e-38	0.288	0.19	lipophosphoglycan biosynthetic protein (lpg2)	GDP-mannose transmembrane transporter activity
1	LmjF.31.2160	0.513259	1.35287e-52	1.10624e-48	0.179	0.089	hypothetical protein, unknown function	N/A
1	LmjF.12.0530	0.5128	2.08345e-86	1.70364e-82	0.757	0.646	glucose-6-phosphate isomerase	glucose-6-phosphate isomerase activity
1	LmjF.19.0630	0.512626	2.18672e-71	1.78808e-67	0.62	0.49	histone H3 variant V	DNA binding;protein heterodimerization activity
1	LmjF.20.1200	0.51227	6.87805e-52	5.62418e-48	0.194	0.1	calpain-like cysteine peptidase, putative	calcium-dependent cysteine-type endopeptidase activity
1	LmjF.31.2960	0.511734	2.63546e-57	2.15501e-53	0.552	0.439	Repressor of differentiation kinase 2, putative	ATP binding;protein kinase activity
1	LmjF.36.4100	0.50777	6.1018e-46	4.98944e-42	0.247	0.149	glycosyl hydrolase-like protein	hydrolase activity, hydrolyzing O-glycosyl compounds
1	LmjF.30.3550	0.507399	3.56219e-48	2.9128e-44	0.315	0.204	cytochrome p450-like protein	heme binding;iron ion binding;monooxygenase activity;oxidoreductase activity, acting on paired donors, with incorporation or reduction of molecular oxygen
1	LmjF.10.0220	0.50694	3.24986e-54	2.65741e-50	0.187	0.093	Amastin surface glycoprotein, putative	N/A
1	LmjF.36.1930	0.505142	5.06953e-57	4.14535e-53	0.467	0.338	Ring finger domain containing protein, putative	metal ion binding
1	LmjF.31.1260	0.500866	4.65619e-45	3.80737e-41	0.219	0.127	Microtubule-binding stalk of dynein motor, putative	ATP-dependent microtubule motor activity, minus-end-directed
1	LmjF.25.2410	0.498041	1.04444e-48	8.54042e-45	0.494	0.381	hypothetical protein, conserved	N/A
1	LmjF.27.0270	0.496677	4.53457e-41	3.70792e-37	0.341	0.24	hypothetical protein, conserved	N/A
1	LmjF.31.0500	0.494317	7.53439e-43	6.16087e-39	0.261	0.163	hypothetical protein, conserved	N/A
1	LmjF.06.0020	0.494276	4.29113e-42	3.50886e-38	0.212	0.124	hypothetical protein, conserved	N/A
1	LmjF.35.5000	0.493351	1.32018e-57	1.07951e-53	0.117	0.045	PSP1 C-terminal conserved region, putative	N/A
1	LmjF.13.1080	0.490233	5.59587e-43	4.57574e-39	0.294	0.192	hypothetical protein, unknown function	N/A
1	LmjF.35.2790	0.488265	1.28502e-41	1.05076e-37	0.242	0.149	hypothetical protein, conserved	N/A
1	LmjF.10.1100	0.486076	5.33903e-47	4.36573e-43	0.246	0.146	hypothetical protein, conserved	N/A
1	LmjF.35.0650	0.485324	4.87251e-47	3.98425e-43	0.538	0.436	hypothetical protein, unknown function	N/A
1	LmjF.19.1630	0.48368	9.22173e-46	7.54061e-42	0.377	0.264	ATG8/AUT7/APG8/PAZ2, putative	N/A
1	LmjF.16.0760	0.479748	4.8442e-49	3.96111e-45	0.5	0.381	transaldolase, putative	catalytic activity;sedoheptulose-7-phosphate:D-glyceraldehyde-3-phosphate glyceronetransferase activity
1	LmjF.17.0630	0.474098	8.55479e-54	6.99525e-50	0.162	0.076	hypothetical protein, unknown function	N/A
1	LmjF.29.2510	0.472957	2.22223e-48	1.81712e-44	0.543	0.434	ATP-dependent 6-phosphofructokinase, glycosomal	6-phosphofructokinase activity;ATP binding
1	LmjF.34.0780	0.469776	1.19641e-37	9.78302e-34	0.203	0.121	serine/threonine-protein phosphatase PP1, putative	hydrolase activity
1	LmjF.31.2380	0.468478	1.22678e-38	1.00314e-34	0.379	0.277	hypothetical protein, unknown function	N/A
1	LmjF.26.1990	0.461681	1.02686e-45	8.39663e-42	0.326	0.215	hypothetical protein, conserved	N/A
1	LmjF.18.0640	0.459008	6.05596e-36	4.95196e-32	0.262	0.173	CAMK/CAMKL family protein kinase, putative	ATP binding;protein kinase activity
1	LmjF.33.0160	0.458032	4.58398e-32	3.74832e-28	0.236	0.155	hypothetical protein, unknown function	N/A
1	LmjF.36.0420	0.457615	1.92162e-34	1.57131e-30	0.181	0.107	amino acid permease-like protein	N/A
1	LmjF.32.2610	0.457027	6.55273e-46	5.35817e-42	0.51	0.404	Tip Of Extending FAZ protein 1	N/A
1	LmjF.20.0590	0.455831	3.66527e-33	2.99709e-29	0.295	0.207	hypothetical protein, conserved	N/A
1	LmjF.04.0220	0.454162	2.42029e-37	1.97907e-33	0.263	0.171	hypothetical protein	N/A
1	LmjF.35.0980	0.454077	1.33125e-32	1.08856e-28	0.287	0.2	aldose 1-epimerase-like protein	carbohydrate binding;catalytic activity;isomerase activity
1	LmjF.14.0720	0.453986	1.80022e-52	1.47204e-48	0.136	0.059	fatty acid elongase, putative	N/A
1	LmjF.17.1190	0.452473	1.05932e-37	8.66209e-34	0.194	0.113	hypothetical protein, unknown function	N/A
1	LmjF.09.0320	0.449212	1.07715e-35	8.80788e-32	0.201	0.121	hypothetical protein, conserved	N/A
1	LmjF.31.2070	0.44733	2.17098e-29	1.77521e-25	0.225	0.15	CRAL/TRIO domain containing protein, putative	N/A
1	LmjF.19.0870	0.447272	3.81647e-26	3.12072e-22	0.267	0.19	ATG8/AUT7/APG8/PAZ2, putative	N/A
1	LmjF.29.0500	0.446625	1.96094e-36	1.60346e-32	0.315	0.219	Ca2+-ATPase N terminal autoinhibitory domain containing protein, putative	calmodulin binding
1	LmjF.16.1650	0.44449	2.24859e-38	1.83867e-34	0.255	0.162	Clustered mitochondria, putative	N/A
1	LmjF.34.2810	0.443527	1.88868e-31	1.54438e-27	0.37	0.281	Carboxypeptidase-like protein	metallocarboxypeptidase activity;zinc ion binding
1	LmjF.05.1000	0.442071	7.43865e-40	6.08258e-36	0.365	0.261	hypothetical protein, conserved	N/A
1	LmjF.23.1440	0.442015	8.99243e-39	7.35311e-35	0.453	0.351	hypothetical protein, unknown function	N/A
1	LmjF.35.3970	0.440714	4.02531e-43	3.2915e-39	0.529	0.424	predicted zinc finger protein	zinc ion binding
1	LmjF.34.0450	0.440114	1.06891e-30	8.74044e-27	0.25	0.169	hypothetical protein, unknown function	N/A
1	LmjF.33.2930	0.439878	8.28027e-32	6.77078e-28	0.196	0.121	Present in the outer mitochondrial membrane proteome 22	N/A
1	LmjF.25.2340	0.4393	1.51529e-39	1.23905e-35	0.371	0.268	AGC essential kinase 1	ATP binding;protein kinase activity
1	LmjF.31.2140	0.438726	1.78402e-40	1.45879e-36	0.151	0.077	hypothetical protein, unknown function	N/A
1	LmjF.03.0310	0.437449	5.2031e-35	4.25458e-31	0.153	0.084	hypothetical protein	N/A
1	LmjF.16.0770	0.435682	9.51037e-33	7.77663e-29	0.19	0.115	hypothetical protein, conserved	protein disulfide oxidoreductase activity
1	LmjF.12.1260	0.435052	3.63452e-33	2.97194e-29	0.321	0.231	hypothetical protein, conserved	N/A
1	LmjF.22.0250	0.434941	5.96843e-33	4.88039e-29	0.158	0.089	phosphoinositide phosphatase	phosphatase activity;phosphoprotein phosphatase activity;protein tyrosine phosphatase activity
1	LmjF.27.1930	0.43445	2.55704e-32	2.09089e-28	0.254	0.17	hypothetical protein, unknown function	N/A
1	LmjF.35.5240	0.43321	4.26602e-30	3.48832e-26	0.205	0.13	hypothetical protein, unknown function	N/A
1	LmjF.32.1580	0.430687	2.17317e-39	1.777e-35	0.337	0.233	phosphomannose isomerase	mannose-6-phosphate isomerase activity;zinc ion binding
1	LmjF.31.1450	0.430443	8.74303e-34	7.14917e-30	0.205	0.126	surface membrane protein gp46-like protein	N/A
1	LmjF.16.0950	0.430438	3.11855e-31	2.55004e-27	0.412	0.325	sucrose-phosphate synthase-like protein	N/A
1	LmjF.31.2590	0.428522	6.92834e-34	5.66531e-30	0.459	0.373	TerD domain containing protein, putative	N/A
1	LmjF.04.0100	0.425296	8.13912e-33	6.65536e-29	0.286	0.197	hypothetical protein, conserved	N/A
1	LmjF.04.0440	0.42463	5.51321e-34	4.50815e-30	0.222	0.14	STE/STE11 serine/threonine-protein kinase, putative	ATP binding;protein kinase activity
1	LmjF.26.1500	0.424385	4.97697e-35	4.06967e-31	0.404	0.305	hypothetical protein, unknown function	N/A
1	LmjF.35.1390	0.420125	1.27299e-30	1.04093e-26	0.264	0.181	Zn-finger in Ran binding protein and others/OTU-like cysteine protease, putative	N/A
1	LmjF.26.1400	0.417683	5.74165e-40	4.69495e-36	0.129	0.062	WWE domain/WD domain, G-beta repeat, putative	protein binding
1	LmjF.20.1190	0.415091	1.61479e-32	1.32041e-28	0.2	0.122	cysteine peptidase, Clan CA, family C2, putative	calcium-dependent cysteine-type endopeptidase activity
1	LmjF.29.0170	0.414812	5.69269e-33	4.65491e-29	0.481	0.388	protein phosphatase inhibitor 2 (ipp-2), putative	protein phosphatase inhibitor activity
1	LmjF.24.2250	0.413564	8.22021e-47	6.72166e-43	0.638	0.54	fatty-acid desaturase, putative	oxidoreductase activity, acting on paired donors, with oxidation of a pair of donors resulting in the reduction of molecular oxygen to two molecules of water;stearoyl-CoA 9-desaturase activity
1	LmjF.31.2220	0.413214	1.21043e-28	9.89765e-25	0.238	0.16	hypothetical protein, unknown function	N/A
1	LmjF.35.0440	0.412798	8.39708e-29	6.8663e-25	0.231	0.155	Arrestin (or S-antigen), N-terminal domain containing protein, putative	N/A
1	LmjF.13.1320	0.410701	2.72507e-42	2.22829e-38	0.111	0.049	hypothetical protein, conserved	N/A
1	LmjF.31.0710	0.410426	1.40764e-35	1.15103e-31	0.471	0.373	hypothetical protein, unknown function	N/A
1	LmjF.33.1570	0.408442	1.17961e-32	9.64569e-29	0.344	0.25	ribulose-5-phosphate 3-epimerase, putative	catalytic activity;racemase and epimerase activity, acting on carbohydrates and derivatives;ribulose-phosphate 3-epimerase activity
1	LmjF.28.0370	0.406439	3.96496e-24	3.24215e-20	0.135	0.081	hypothetical protein, unknown function	N/A
1	LmjF.07.0090	0.405683	1.76385e-29	1.4423e-25	0.426	0.338	methionine synthase, putative	cobalamin binding;metal ion binding;methionine synthase activity;zinc ion binding
1	LmjF.36.6530	0.405646	3.07056e-24	2.51079e-20	0.212	0.145	hypothetical protein, conserved	N/A
1	LmjF.20.1230	0.405623	7.92482e-32	6.48013e-28	0.208	0.129	Domain of unknown function (DUF1935), putative	N/A
1	LmjF.32.0630	0.405233	7.31132e-29	5.97847e-25	0.368	0.283	AmmeMemoRadiSam system protein A/uncharacterized protein, PH0010 family, putative	N/A
1	LmjF.33.1590	0.403978	5.42947e-29	4.43967e-25	0.322	0.236	3-ketoacyl-CoA reductase, putative	N/A
1	LmjF.12.0780	0.401795	2.9254e-50	2.3921e-46	0.103	0.039	surface antigen protein 2 precursor	N/A
1	LmjF.22.0220	0.401532	1.08643e-26	8.88375e-23	0.298	0.219	Domain of unknown function (DUF1736), putative	protein binding
1	LmjF.35.5070	0.399502	2.14099e-29	1.75069e-25	0.232	0.154	hypothetical protein, conserved	N/A
1	LmjF.28.2910	0.399296	1.34762e-36	1.10195e-32	0.578	0.486	glutamate dehydrogenase, putative	oxidoreductase activity;oxidoreductase activity, acting on the CH-NH2 group of donors, NAD or NADP as acceptor
1	LmjF.19.0370	0.398792	4.96759e-32	4.062e-28	0.355	0.261	hypothetical protein, conserved	N/A
1	LmjF.34.0770	0.397963	5.18725e-38	4.24161e-34	0.467	0.36	hypothetical protein, conserved	N/A
1	LmjF.03.0030	0.397184	1.49017e-29	1.21851e-25	0.239	0.16	D-3-phosphoglycerate dehydrogenase-like protein	NAD binding;oxidoreductase activity, acting on the CH-OH group of donors, NAD or NADP as acceptor
1	LmjF.26.1440	0.39645	5.62531e-32	4.59981e-28	0.446	0.353	hypothetical protein, conserved	N/A
1	LmjF.34.2570	0.395332	2.03417e-24	1.66334e-20	0.26	0.187	Flagellum attachment zone protein 8	N/A
1	LmjF.03.0370	0.394429	2.16158e-23	1.76752e-19	0.185	0.121	GPR1/FUN34/yaaH family, putative	N/A
1	LmjF.14.0730	0.393886	4.46668e-30	3.65241e-26	0.138	0.076	fatty acid elongase, putative	N/A
1	LmjF.08.0460	0.392942	1.4944e-26	1.22197e-22	0.322	0.242	hypothetical protein, unknown function	N/A
1	LmjF.30.1740	0.39211	2.47751e-35	2.02586e-31	0.129	0.065	hypothetical protein, unknown function	N/A
1	LmjF.06.0050	0.391436	1.68826e-31	1.38049e-27	0.452	0.365	pumilio/PUF RNA binding protein 5, putative	RNA binding
1	LmjF.04.1230	0.391016	2.3875e-42	1.95226e-38	0.662	0.579	actin	N/A
1	LmjF.29.2220	0.388075	3.89925e-23	3.18842e-19	0.28	0.207	hypothetical protein, unknown function	N/A
1	LmjF.25.2375	0.387167	7.1944e-31	5.88286e-27	0.421	0.329	hypothetical protein	N/A
1	LmjF.12.0540	0.385416	7.76751e-25	6.35149e-21	0.327	0.25	Present in the outer mitochondrial membrane proteome 18	N/A
1	LmjF.33.1540	0.385105	1.18952e-27	9.72673e-24	0.271	0.191	elongation factor 1-gamma, putative	protein binding
1	LmjF.23.0990	0.384261	5.50768e-35	4.50363e-31	0.503	0.407	hypothetical protein, conserved	N/A
1	LmjF.12.1020	0.384239	1.21447e-39	9.93075e-36	0.697	0.632	surface antigen protein, putative	N/A
1	LmjF.16.0920	0.382808	1.4266e-16	1.16653e-12	0.29	0.232	flagellar calcium-binding protein, putative	N/A
1	LmjF.24.0360	0.382229	5.40542e-31	4.42002e-27	0.439	0.351	UDP-galactose transporter	pyrimidine nucleotide-sugar transmembrane transporter activity
1	LmjF.32.0700	0.380094	1.0353e-25	8.46568e-22	0.366	0.285	ubiquitin-conjugating enzyme E2, putative	N/A
1	LmjF.30.2580	0.379554	1.15371e-44	9.43391e-41	0.613	0.51	reticulon domain protein, 22 kDa potentially aggravating protein (paple22)	N/A
1	LmjF.23.0840	0.379441	2.14694e-27	1.75555e-23	0.321	0.239	hypothetical protein, unknown function	N/A
1	LmjF.10.0260	0.379389	8.99519e-22	7.35537e-18	0.458	0.393	COPI associated protein, putative	N/A
1	LmjF.26.2670	0.379368	7.83934e-23	6.41023e-19	0.192	0.129	ATP-binding cassette protein subfamily B, member 2, putative	ATP binding;ATPase activity;ATPase-coupled transmembrane transporter activity
1	LmjF.35.1630	0.378471	7.98045e-21	6.52561e-17	0.255	0.189	hypothetical protein, conserved	N/A
1	LmjF.36.0660	0.375037	1.47277e-33	1.20428e-29	0.412	0.312	Enriched in surface-labeled proteome protein 18	N/A
1	LmjF.19.0920	0.373104	1.58304e-32	1.29445e-28	0.539	0.45	folate/biopterin transporter, putative	N/A
1	LmjF.11.0610	0.372402	7.38961e-30	6.04249e-26	0.158	0.092	conserved protein, unknown function	N/A
1	LmjF.04.0660	0.371509	9.06887e-22	7.41561e-18	0.313	0.241	hypothetical protein, conserved	N/A
1	LmjF.35.4350	0.370484	3.59086e-19	2.93625e-15	0.187	0.13	PGAP1-like protein, putative	hydrolase activity, acting on ester bonds
1	LmjF.22.0180	0.370016	8.85282e-25	7.23895e-21	0.374	0.294	hypothetical protein, conserved	N/A
1	LmjF.11.0720	0.369476	2.1085e-24	1.72412e-20	0.404	0.326	PUF nine target 1	N/A
1	LmjF.31.2190	0.366996	3.22615e-23	2.63803e-19	0.198	0.133	hypothetical protein, unknown function	N/A
1	LmjF.20.1330	0.366815	3.97088e-38	3.24699e-34	0.11	0.05	protein kinase, putative	ATP binding;protein kinase activity
1	LmjF.19.1000	0.364601	1.55868e-19	1.27453e-15	0.184	0.127	glycerol uptake protein, putative	N/A
1	LmjF.02.0050	0.364132	8.49245e-21	6.94428e-17	0.299	0.229	cytochrome b-domain protein, putative	heme binding
1	LmjF.32.1810	0.363986	1.32114e-22	1.0803e-18	0.162	0.103	Serine/threonine-protein kinase NEK21, putative	ATP binding;protein kinase activity
1	LmjF.35.2090	0.363575	6.49859e-22	5.3139e-18	0.182	0.121	kinesin, putative	ATP binding;microtubule binding;microtubule motor activity
1	LmjF.36.4690	0.362761	1.21857e-39	9.96421e-36	0.108	0.048	Alpha/beta hydrolase family, putative	N/A
1	LmjF.29.2200	0.36189	8.63793e-24	7.06324e-20	0.268	0.194	dynamin-1-like protein	GTP binding;GTPase activity
1	LmjF.34.1380	0.360752	1.45361e-26	1.18862e-22	0.137	0.078	hypothetical protein, unknown function	N/A
1	LmjF.17.0870	0.360434	1.3306e-36	1.08803e-32	0.676	0.599	META domain containing protein	N/A
1	LmjF.23.0380	0.360219	2.63166e-23	2.15191e-19	0.361	0.285	ATP-binding cassette protein subfamily G, member 5	ATP binding;ATPase activity
1	LmjF.27.1770	0.357098	7.24905e-18	5.92755e-14	0.195	0.139	Frag1/DRAM/Sfk1 family, putative	N/A
1	LmjF.27.1340	0.356897	1.1264e-26	9.21054e-23	0.242	0.165	hypothetical protein, unknown function	N/A
1	LmjF.12.0590	0.356475	1.29987e-19	1.0629e-15	0.106	0.062	Fusaric acid resistance protein-like, putative	N/A
1	LmjF.23.1110	0.356144	8.72728e-19	7.1363e-15	0.297	0.233	hypothetical protein, unknown function	transferase activity, transferring phosphorus-containing groups
1	LmjF.20.1310	0.354126	1.54842e-85	1.26614e-81	0.905	0.845	small myristoylated protein-1	N/A
1	LmjF.09.1170	0.353511	9.34022e-20	7.63749e-16	0.229	0.166	hypothetical protein, conserved	N/A
1	LmjF.26.0980	0.353448	8.23728e-25	6.73562e-21	0.321	0.243	CMGC/SRPK protein kinase, putative	ATP binding;protein kinase activity
1	LmjF.28.2660	0.353383	3.11262e-24	2.54519e-20	0.222	0.152	SelR domain containing protein, putative	oxidoreductase activity, acting on a sulfur group of donors, disulfide as acceptor;peptide-methionine (R)-S-oxide reductase activity
1	LmjF.20.0150	0.351072	2.72397e-22	2.22739e-18	0.22	0.153	Domain of unknown function (DUF1736), putative	protein binding
1	LmjF.35.2725	0.350629	2.03356e-24	1.66284e-20	0.222	0.151	hypothetical protein	N/A
1	LmjF.15.0890	0.347394	2.62305e-24	2.14486e-20	0.118	0.066	ATP-binding cassette protein subfamily G, member 4, putative	ATP binding;ATPase activity;ATPase-coupled transmembrane transporter activity
1	LmjF.20.1560	0.347377	5.47021e-22	4.47299e-18	0.273	0.202	amidohydrolase, putative	hydrolase activity
1	LmjF.19.1345	0.346713	1.76833e-24	1.44596e-20	0.16	0.1	glycerol uptake protein, putative	N/A
1	LmjF.33.2260	0.346581	3.55044e-25	2.9032e-21	0.188	0.121	glycosyl hydrolase-like protein	mannosyl-glycoprotein endo-beta-N-acetylglucosaminidase activity
1	LmjF.31.2090	0.345451	8.9312e-22	7.30304e-18	0.227	0.161	hypothetical protein, unknown function	N/A
1	LmjF.36.0260	0.343015	1.41777e-16	1.15931e-12	0.295	0.235	xylulokinase, putative	phosphotransferase activity, alcohol group as acceptor;xylulokinase activity
1	LmjF.10.0480	0.342525	2.66068e-15	2.17564e-11	0.218	0.164	GP63, leishmanolysin	metalloendopeptidase activity
1	LmjF.18.1120	0.341748	2.29461e-16	1.8763e-12	0.263	0.202	AN1-like zinc finger, putative	zinc ion binding
1	LmjF.29.1960	0.341138	1.09536e-21	8.95679e-18	0.316	0.242	Fumarate hydratase class I, cytosolic	fumarate hydratase activity;hydro-lyase activity;lyase activity
1	LmjF.26.2550	0.3394	1.70151e-17	1.39133e-13	0.332	0.267	hypothetical protein, conserved	N/A
1	LmjF.28.1405	0.339359	1.92743e-18	1.57606e-14	0.248	0.186	hypothetical protein	metal ion binding
1	LmjF.22.0630	0.339236	1.1405e-26	9.32585e-23	0.122	0.067	hypothetical protein, unknown function	N/A
1	LmjF.33.1000	0.338387	8.31149e-20	6.79631e-16	0.16	0.105	diacylglycerol acyltransferase, putative	transferase activity, transferring acyl groups other than amino-acyl groups
1	LmjF.36.0670	0.338285	1.5119e-20	1.23628e-16	0.29	0.22	EamA-like transporter family, putative	N/A
1	LmjF.27.0540	0.337776	2.07027e-22	1.69286e-18	0.162	0.103	Amastin surface glycoprotein, putative	N/A
1	LmjF.09.0580	0.337505	3.85904e-22	3.15554e-18	0.133	0.08	surface antigen-like protein	N/A
1	LmjF.33.2940	0.336701	9.73025e-19	7.95642e-15	0.161	0.108	hypothetical protein, conserved	N/A
1	LmjF.35.2730	0.336285	6.48249e-18	5.30073e-14	0.247	0.185	acyl-CoA dehydrogenase, putative	acyl-CoA dehydrogenase activity;flavin adenine dinucleotide binding;oxidoreductase activity, acting on the CH-CH group of donors
1	LmjF.01.0500	0.335639	3.75937e-16	3.07404e-12	0.146	0.099	fatty acyl CoA synthetase 2, putative	N/A
1	LmjF.27.1200	0.335022	2.02882e-23	1.65897e-19	0.403	0.326	RING-H2 zinc finger, putative	N/A
1	LmjF.34.0070	0.334792	1.79296e-21	1.4661e-17	0.503	0.434	ascorbate peroxidase	heme binding;peroxidase activity
1	LmjF.21.1480	0.333192	2.5848e-16	2.11359e-12	0.466	0.409	hypothetical protein, conserved	N/A
1	LmjF.27.1780	0.332961	2.26632e-19	1.85317e-15	0.274	0.207	casein kinase I-like protein	ATP binding;protein kinase activity
1	LmjF.08.0870	0.331324	9.51879e-17	7.78351e-13	0.237	0.179	hypothetical protein, unknown function	N/A
1	LmjF.24.1880	0.331302	2.03055e-21	1.66038e-17	0.178	0.118	cyclin 11, putative	protein kinase binding
1	LmjF.31.1920	0.330463	5.96055e-19	4.87394e-15	0.361	0.294	RING-variant domain containing protein, putative	zinc ion binding
1	LmjF.17.0910	0.330153	6.60604e-20	5.40176e-16	0.349	0.277	acyltransferase, putative	transferase activity, transferring acyl groups
1	LmjF.20.1030	0.329714	3.91491e-17	3.20122e-13	0.221	0.164	hypothetical protein, conserved	N/A
1	LmjF.31.2200	0.328864	9.05665e-28	7.40562e-24	0.13	0.072	hypothetical protein, unknown function	N/A
1	LmjF.25.1750	0.328381	5.56986e-24	4.55447e-20	0.13	0.076	Domain of unknown function (DUF1935), putative	N/A
1	LmjF.28.0420	0.3275	4.33702e-20	3.54638e-16	0.284	0.215	hypothetical protein, conserved (pseudogene)	N/A
1	LmjF.23.1060	0.326714	7.14077e-19	5.83901e-15	0.67	0.65	hydrophilic acylated surface protein b	N/A
1	LmjF.33.2010	0.325641	6.03804e-20	4.9373e-16	0.384	0.314	calpain protease-like protein	calcium-dependent cysteine-type endopeptidase activity
1	LmjF.11.1080	0.32564	3.53375e-19	2.88954e-15	0.285	0.218	palmitoyl acyltransferase 7, putative	palmitoyltransferase activity
1	LmjF.21.1350	0.325105	1.8834e-18	1.54005e-14	0.196	0.138	PB1 domain containing protein, putative	protein binding
1	LmjF.32.0980	0.324954	1.08885e-16	8.9035e-13	0.185	0.131	hypothetical protein, conserved	nucleic acid binding
1	LmjF.13.1310	0.323779	8.90924e-19	7.28509e-15	0.202	0.142	hypothetical protein, unknown function	N/A
1	LmjF.08.0200	0.32369	1.19849e-16	9.80005e-13	0.322	0.258	Inositol phosphosphingolipids phospholipase C	sphingomyelin phosphodiesterase activity
1	LmjF.35.1010	0.323293	1.4687e-29	1.20096e-25	0.602	0.526	casein kinase, putative	ATP binding;protein kinase activity
1	LmjF.27.1805	0.322153	8.52001e-21	6.96682e-17	0.13	0.079	Phosphoenolpyruvate carboxykinase [ATP], glycosomal	ATP binding;phosphoenolpyruvate carboxykinase (ATP) activity;phosphoenolpyruvate carboxykinase activity;purine nucleotide binding
1	LmjF.19.1005	0.320157	6.36326e-21	5.20324e-17	0.311	0.238	4-coumarate:coa ligase-like protein	N/A
1	LmjF.35.2820	0.318612	8.76892e-22	7.17035e-18	0.227	0.159	major facilitator superfamily, putative	transmembrane transporter activity
1	LmjF.36.5970	0.318347	5.21446e-16	4.26387e-12	0.239	0.183	Flagellum attachment zone protein 5	N/A
1	LmjF.19.0360	0.317352	2.65293e-15	2.1693e-11	0.259	0.204	CMGC/DYRK protein kinase, putative	ATP binding;protein kinase activity
1	LmjF.30.0930	0.316883	1.05703e-15	8.6433e-12	0.249	0.19	conserved hypothetical protein, putative	N/A
1	LmjF.16.1330	0.314842	7.76055e-17	6.3458e-13	0.181	0.127	hypothetical protein, conserved	N/A
1	LmjF.22.0610	0.314072	1.24281e-24	1.01625e-20	0.192	0.124	ubiquitin-conjugating enzyme-like protein	N/A
1	LmjF.23.1050	0.314045	2.59969e-51	2.12577e-47	0.788	0.716	small hydrophilic endoplasmic reticulum-associated protein (sherp)	N/A
1	LmjF.28.1995	0.313699	7.23235e-18	5.91389e-14	0.194	0.137	hypothetical protein, conserved	N/A
1	LmjF.04.0390	0.313648	4.23582e-26	3.46363e-22	0.407	0.316	hypothetical protein	N/A
1	LmjF.31.2300	0.312843	1.34759e-14	1.10193e-10	0.436	0.383	3'-nucleotidase/nuclease, putative	endonuclease activity;hydrolase activity, acting on ester bonds;nucleic acid binding
1	LmjF.30.2330	0.311909	6.38595e-19	5.22179e-15	0.563	0.506	hypothetical protein, unknown function	N/A
1	LmjF.33.0270	0.310458	6.85271e-15	5.60346e-11	0.246	0.191	Mpv17 / PMP22 family, putative	N/A
1	LmjF.36.4540	0.309844	4.59059e-17	3.75372e-13	0.236	0.178	elongation factor-2 kinase-like protein	ATP binding;protein serine/threonine kinase activity
1	LmjF.36.4830	0.309061	1.01506e-15	8.30011e-12	0.222	0.166	hypothetical protein, conserved	N/A
1	LmjF.31.0720	0.308794	9.61565e-23	7.86272e-19	0.519	0.445	major facilitator superfamily, putative	transmembrane transporter activity
1	LmjF.34.3380	0.307923	5.2305e-17	4.27698e-13	0.351	0.286	aldose 1-epimerase-like protein	carbohydrate binding;catalytic activity;isomerase activity
1	LmjF.08.0600	0.307279	5.75859e-17	4.7088e-13	0.391	0.327	hypothetical protein, unknown function	N/A
1	LmjF.28.2250	0.307098	5.07575e-17	4.15044e-13	0.239	0.179	glycosomal membrane protein-like protein	N/A
1	LmjF.35.4700	0.306044	8.19529e-16	6.70128e-12	0.17	0.12	Kinesin-13 6, putative	ATP binding;microtubule binding;microtubule motor activity
1	LmjF.31.1680	0.305369	2.67709e-16	2.18905e-12	0.401	0.339	hypothetical protein, conserved	N/A
1	LmjF.23.0610	0.303953	1.84093e-14	1.50533e-10	0.108	0.069	hypothetical protein, conserved	N/A
1	LmjF.31.2210	0.303738	5.3455e-14	4.37101e-10	0.316	0.259	hypothetical protein, unknown function	N/A
1	LmjF.28.1090	0.303046	2.8852e-15	2.35923e-11	0.315	0.256	ATP-grasp domain containing protein, putative	ATP binding;metal ion binding
1	LmjF.35.0850	0.302552	5.37359e-13	4.39398e-09	0.25	0.199	Protein of unknown function (DUF2838), putative	N/A
1	LmjF.21.1610	0.302501	4.91431e-16	4.01843e-12	0.192	0.139	hypothetical protein, conserved	N/A
1	LmjF.31.1420	0.302075	2.68417e-13	2.19484e-09	0.225	0.175	hypothetical protein, conserved	N/A
1	LmjF.01.0690	0.301815	6.3085e-17	5.15846e-13	0.293	0.229	PLAC8 family, putative	N/A
1	LmjF.31.0300	0.301185	8.23765e-16	6.73593e-12	0.315	0.254	CRAL/TRIO domain containing protein, putative	N/A
1	LmjF.06.0070	0.300941	2.93614e-13	2.40088e-09	0.196	0.148	hypothetical protein, conserved	N/A
1	LmjF.28.2380	0.299621	1.78338e-12	1.45827e-08	0.135	0.095	subtilisin-like serine peptidase	N/A
1	LmjF.35.4220	0.299281	2.61276e-21	2.13646e-17	0.113	0.065	hypothetical protein, unknown function	N/A
1	LmjF.06.0730	0.299025	1.12536e-15	9.20207e-12	0.353	0.292	serine-threonine dehydratase, putative	N/A
1	LmjF.34.1510	0.298675	2.27382e-18	1.8593e-14	0.272	0.204	hypothetical protein, conserved	N/A
1	LmjF.36.6650	0.298484	1.0439e-15	8.53595e-12	0.473	0.422	2,3-bisphosphoglycerate-independent phosphoglycerate mutase	catalytic activity;manganese ion binding;metal ion binding;phosphoglycerate mutase activity
1	LmjF.21.0250	0.298337	4.39036e-16	3.59e-12	0.358	0.296	hexokinase, putative	ATP binding;glucose binding;hexokinase activity;phosphotransferase activity, alcohol group as acceptor
1	LmjF.36.2470	0.297871	3.33149e-16	2.72416e-12	0.367	0.304	acid phosphatase, putative	N/A
1	LmjF.36.6523	0.297706	5.08535e-14	4.15829e-10	0.195	0.145	hypothetical protein, conserved	N/A
1	LmjF.07.0530	0.297637	4.31858e-13	3.5313e-09	0.25	0.199	adp/ATP carrier-like protein	ATP:ADP antiporter activity
1	LmjF.36.3630	0.297489	3.43809e-25	2.81133e-21	0.116	0.064	hypothetical protein, unknown function	N/A
1	LmjF.09.0340	0.295682	2.41337e-16	1.97341e-12	0.175	0.123	hypothetical protein, conserved	N/A
1	LmjF.30.3380	0.295544	6.87122e-12	5.6186e-08	0.334	0.285	PAS-domain containing phosphoglycerate kinase, putative	phosphoglycerate kinase activity
1	LmjF.35.4810	0.295263	1.00934e-14	8.25338e-11	0.15	0.104	BRCA1 C Terminus (BRCT) domain containing protein, putative	N/A
1	LmjF.16.0990	0.294555	1.30417e-16	1.06642e-12	0.12	0.076	cdc2-related protein kinase 4, putative	ATP binding;protein kinase activity
1	LmjF.10.0170	0.29398	2.20363e-13	1.80191e-09	0.231	0.18	guanosine diphosphatase, putative	hydrolase activity
1	LmjF.31.2195	0.293857	9.95242e-17	8.13809e-13	0.195	0.14	hypothetical protein	N/A
1	LmjF.02.0570	0.293668	2.17218e-17	1.77619e-13	0.132	0.085	protein kinase, putative	ATP binding;protein kinase activity
1	LmjF.30.3120	0.293603	1.6322e-15	1.33465e-11	0.352	0.293	S-adenosylmethionine decarboxylase proenzyme- like, putative	adenosylmethionine decarboxylase activity
1	LmjF.31.0800	0.293214	4.21339e-11	3.44529e-07	0.261	0.215	hypothetical protein, conserved	N/A
1	LmjF.28.1950	0.292471	4.1488e-16	3.39247e-12	0.399	0.337	X-pro, dipeptidyl-peptidase,serine peptidase, Clan SC, family S15, putative	dipeptidyl-peptidase activity;hydrolase activity
1	LmjF.27.1080	0.292189	8.58366e-14	7.01886e-10	0.462	0.413	hypothetical protein, conserved	protein binding
1	LmjF.19.0690	0.292087	3.80752e-18	3.11341e-14	0.231	0.168	Flagellum attachment zone protein 7	ATP binding;microtubule binding;microtubule motor activity
1	LmjF.36.4640	0.292082	3.57591e-13	2.92402e-09	0.26	0.207	Esterase PHB depolymerase, putative	hydrolase activity
1	LmjF.26.0740	0.291807	2.12361e-18	1.73647e-14	0.141	0.09	Regulator of chromosome condensation (RCC1) repeat, putative	N/A
1	LmjF.24.2150	0.291547	9.34015e-17	7.63744e-13	0.211	0.154	hypothetical protein, unknown function	N/A
1	LmjF.10.0510	0.290426	2.77125e-26	2.26605e-22	0.615	0.539	glycerol-3-phosphate dehydrogenase [NAD+], glycosomal	NAD binding;glycerol-3-phosphate dehydrogenase [NAD+] activity;oxidoreductase activity;oxidoreductase activity, acting on the CH-OH group of donors, NAD or NADP as acceptor
1	LmjF.28.2770	0.290142	6.84679e-186	5.59862e-182	0.999	0.997	heat-shock protein hsp70, putative	N/A
1	LmjF.11.1020	0.289516	4.79329e-13	3.91947e-09	0.181	0.136	hypothetical protein, conserved	N/A
1	LmjF.02.0340	0.288426	5.81528e-17	4.75515e-13	0.161	0.11	UAA transporter family, putative	N/A
1	LmjF.10.0990	0.286777	1.34043e-37	1.09607e-33	0.863	0.855	histone H3	DNA binding;protein heterodimerization activity
1	LmjF.32.1610	0.286566	9.32611e-15	7.62596e-11	0.269	0.212	hypothetical protein, conserved	N/A
1	LmjF.35.0750	0.286435	4.18548e-13	3.42246e-09	0.291	0.238	proteasome activator protein pa26, putative	N/A
1	LmjF.16.0895	0.285917	2.50868e-14	2.05135e-10	0.128	0.087	hypothetical protein, conserved	N/A
1	LmjF.32.0350	0.285827	2.57006e-10	2.10154e-06	0.21	0.168	hypothetical protein, conserved	N/A
1	LmjF.17.0190	0.28578	5.56808e-17	4.55302e-13	0.106	0.064	receptor-type adenylate cyclase, putative	N/A
1	LmjF.26.0730	0.285654	1.0044e-12	8.21299e-09	0.316	0.262	hypothetical protein, conserved	N/A
1	LmjF.13.1250	0.285525	4.15893e-16	3.40076e-12	0.147	0.099	hypothetical protein, unknown function	N/A
1	LmjF.35.0080	0.285302	2.88716e-12	2.36083e-08	0.193	0.147	Trk system potassium uptake protein	cation transmembrane transporter activity
1	LmjF.29.2100	0.285286	7.94035e-16	6.49282e-12	0.207	0.152	Present in the outer mitochondrial membrane proteome 37	N/A
1	LmjF.31.0400	0.284197	7.56237e-15	6.18375e-11	0.35	0.289	calpain-like protein, putative	calcium-dependent cysteine-type endopeptidase activity
1	LmjF.36.0900	0.284059	6.66858e-14	5.4529e-10	0.317	0.26	SNF1-related protein kinases, putative	ATP binding;protein kinase activity
1	LmjF.33.1940	0.283641	1.23453e-13	1.00947e-09	0.195	0.147	hypothetical protein, conserved	N/A
1	LmjF.25.1120	0.283546	7.70343e-15	6.2991e-11	0.358	0.299	aldehyde dehydrogenase, mitochondrial precursor	oxidoreductase activity;oxidoreductase activity, acting on the aldehyde or oxo group of donors, NAD or NADP as acceptor
1	LmjF.12.0045	0.282628	4.63507e-14	3.7901e-10	0.197	0.146	hypothetical protein, conserved	N/A
1	LmjF.22.1610	0.282391	2.43234e-15	1.98892e-11	0.335	0.273	hypothetical protein, conserved	N/A
1	LmjF.32.3040	0.282091	1.5144e-15	1.23832e-11	0.321	0.26	protein phosphatase 4, putative	hydrolase activity
1	LmjF.32.0260	0.282078	2.72883e-13	2.23136e-09	0.354	0.299	Serine/threonine-protein kinase NEK16, putative	ATP binding;protein kinase activity
1	LmjF.36.6550	0.280618	1.03196e-14	8.43837e-11	0.156	0.109	protein-l-isoaspartate o-methyltransferase, putative	protein-L-isoaspartate (D-aspartate) O-methyltransferase activity
1	LmjF.31.1200	0.280334	2.18457e-17	1.78632e-13	0.521	0.459	cytochrome b5-like Heme/Steroid binding domain containing protein, putative	N/A
1	LmjF.33.0830	0.27997	3.59496e-18	2.9396e-14	0.383	0.312	2,4-dienoyl-CoA reductase	FMN binding;catalytic activity;oxidoreductase activity
1	LmjF.26.0020	0.279784	1.2911e-15	1.05573e-11	0.172	0.121	methylmalonyl-coa epimerase-like protein	N/A
1	LmjF.36.1540	0.279552	2.61004e-11	2.13423e-07	0.363	0.314	engulfment and cell motility domain 2, putative	GTPase activator activity
1	LmjF.33.1470	0.278878	1.03634e-15	8.47418e-12	0.222	0.165	RNA-binding protein, putative	nucleic acid binding
1	LmjF.10.0430	0.278639	4.58841e-14	3.75194e-10	0.164	0.117	Zinc finger, C3HC4 type (RING finger), putative	N/A
1	LmjF.12.0380	0.278443	5.05558e-15	4.13395e-11	0.321	0.261	pumillio protein 4, putative	RNA binding
1	LmjF.32.0680	0.278322	4.48522e-15	3.66757e-11	0.287	0.228	OSM3-like kinesin, putative	ATP binding;microtubule binding;microtubule motor activity
1	LmjF.33.2835	0.278201	3.48823e-12	2.85232e-08	0.283	0.232	hypothetical protein	N/A
1	LmjF.22.1600	0.277623	8.26896e-11	6.76153e-07	0.244	0.198	ser/thr protein phosphatase, putative	hydrolase activity
1	LmjF.17.0180	0.277404	1.27288e-09	1.04084e-05	0.28	0.238	receptor-type adenylate cyclase b	N/A
1	LmjF.18.0110	0.276736	4.5687e-13	3.73583e-09	0.225	0.174	Protein of unknown function (DUF726), putative	N/A
1	LmjF.35.1180	0.275765	9.69911e-16	7.93096e-12	0.362	0.297	NADH-dependent fumarate reductase, putative	oxidoreductase activity;succinate dehydrogenase activity
1	LmjF.12.0360	0.275547	4.54172e-15	3.71376e-11	0.246	0.188	Glutathione S-transferase, N-terminal domain containing protein, putative	protein binding
1	LmjF.32.1880	0.275474	1.09211e-17	8.93021e-14	0.329	0.258	3'-5' exonuclease, putative	3'-5' exonuclease activity;nucleic acid binding
1	LmjF.09.1110	0.274828	1.53175e-13	1.25251e-09	0.202	0.152	hypothetical protein, conserved	N/A
1	LmjF.30.0900	0.274212	2.32604e-09	1.902e-05	0.244	0.203	hypothetical protein, conserved	N/A
1	LmjF.30.1070	0.273707	2.69939e-13	2.20729e-09	0.221	0.17	Flavinator of succinate dehydrogenase, putative	N/A
1	LmjF.31.2520	0.272861	4.29168e-14	3.50931e-10	0.142	0.099	hypothetical protein, conserved	N/A
1	LmjF.36.3620	0.27112	3.57758e-29	2.92539e-25	0.846	0.835	EF-hand domain pair, putative	calcium ion binding
1	LmjF.09.0060	0.270662	1.59594e-33	1.305e-29	0.76	0.697	RNA-binding protein 5, putative	nucleic acid binding
1	LmjF.23.0540	0.270454	2.925e-17	2.39177e-13	0.461	0.396	acetyl-CoA synthetase, putative	AMP binding;acetate-CoA ligase activity
1	LmjF.35.3080	0.26963	4.46173e-13	3.64836e-09	0.237	0.186	glycerol kinase, glycosomal, putative	glycerol kinase activity;phosphotransferase activity, alcohol group as acceptor
1	LmjF.36.3830	0.268201	6.87822e-13	5.62432e-09	0.282	0.227	Zinc finger, C3HC4 type (RING finger), putative	N/A
1	LmjF.12.1120	0.268094	4.40607e-12	3.60285e-08	0.29	0.239	Flagellum attachment zone protein 2	N/A
1	LmjF.34.2540	0.268044	1.22974e-12	1.00556e-08	0.263	0.211	Coiled-coil and C2 domain-containing protein	N/A
1	LmjF.27.1360	0.267535	2.5584e-14	2.092e-10	0.234	0.179	hypothetical protein, conserved	N/A
1	LmjF.18.1130	0.267378	2.84213e-11	2.32401e-07	0.282	0.232	Ras-related protein Rab5A, putative	GTP binding;GTPase activity
1	LmjF.26.2520	0.266912	1.00413e-14	8.21077e-11	0.354	0.293	chaperone protein DnaJ, putative	N/A
1	LmjF.10.0080	0.265978	9.08092e-11	7.42547e-07	0.267	0.22	hypothetical protein, unknown function	N/A
1	LmjF.29.0935	0.265441	2.46679e-14	2.0171e-10	0.211	0.158	A-1 protein, putative	N/A
1	LmjF.30.3410	0.26478	5.80406e-11	4.74598e-07	0.287	0.239	hypothetical protein, conserved	ATP-dependent microtubule motor activity, minus-end-directed;protein binding
1	LmjF.36.6280	0.264507	4.96901e-12	4.06316e-08	0.272	0.222	glucose transporter 3	transmembrane transporter activity
1	LmjF.35.0480	0.264093	1.54366e-14	1.26225e-10	0.337	0.276	hypothetical protein, conserved	N/A
1	LmjF.36.0610	0.263955	9.22614e-12	7.54421e-08	0.249	0.2	DNAJ protein-like protein	N/A
1	LmjF.18.1150	0.263537	1.92254e-13	1.57206e-09	0.28	0.225	Zinc finger, C3HC4 type (RING finger), putative	N/A
1	LmjF.35.1040	0.262672	9.86981e-16	8.07055e-12	0.391	0.326	zinc finger CCCH domain containing protein 11	metal ion binding
1	LmjF.15.1300	0.262642	4.38305e-10	3.58402e-06	0.312	0.267	ubiquitin hydrolase, putative	thiol-dependent ubiquitin-specific protease activity
1	LmjF.21.0835	0.262531	8.97253e-12	7.33684e-08	0.254	0.204	hypothetical protein, conserved	N/A
1	LmjF.34.0060	0.262109	1.12933e-12	9.23449e-09	0.291	0.237	hypothetical protein, conserved	N/A
1	LmjF.31.2170	0.261823	6.8027e-12	5.56257e-08	0.336	0.285	ARM-like helical domain-containing protein	N/A
1	LmjF.35.0830	0.261294	7.16855e-13	5.86172e-09	0.208	0.158	NADH-dependent fumarate reductase-like protein	oxidoreductase activity;succinate dehydrogenase activity
1	LmjF.30.2780	0.260993	5.03281e-15	4.11533e-11	0.137	0.092	Zinc finger C-x8-C-x5-C-x3-H type (and similar), putative	metal ion binding
1	LmjF.20.1370	0.260922	2.08988e-16	1.70889e-12	0.105	0.065	pumilio protein 9, putative	RNA binding
1	LmjF.35.3770	0.259418	4.68995e-12	3.83497e-08	0.121	0.083	Enriched in surface-labeled proteome protein 9, putative	N/A
1	LmjF.14.1360	0.2584	8.58554e-13	7.0204e-09	0.456	0.408	inositol-3-phosphate synthase	inositol-3-phosphate synthase activity
1	LmjF.28.0590	0.258071	2.01563e-13	1.64818e-09	0.33	0.274	hypothetical protein, unknown function	N/A
1	LmjF.07.0330	0.257279	2.62425e-10	2.14585e-06	0.208	0.165	Protein of unknown function (DUF3735)/Abscisic acid G-protein coupled receptor, putative	N/A
1	LmjF.13.1410	0.257224	1.83721e-17	1.50229e-13	0.126	0.079	hypothetical protein, unknown function	N/A
1	LmjF.35.0270	0.256345	3.10974e-11	2.54284e-07	0.451	0.406	hypothetical protein, conserved	N/A
1	LmjF.18.0400	0.255874	8.52535e-12	6.97118e-08	0.227	0.179	UDP-galactose transporter	pyrimidine nucleotide-sugar transmembrane transporter activity
1	LmjF.35.3520	0.255518	2.63927e-12	2.15813e-08	0.124	0.086	NLI interacting factor-like phosphatase, putative	N/A
1	LmjF.33.2070	0.255488	5.19827e-12	4.25062e-08	0.206	0.158	mitogen-activated protein kinase, putative	ATP binding;protein kinase activity
1	LmjF.36.3240	0.25464	2.6687e-12	2.1822e-08	0.238	0.186	hypothetical protein, unknown function	N/A
1	LmjF.28.1120	0.253499	6.74079e-14	5.51194e-10	0.168	0.121	hypothetical protein, conserved	N/A
1	LmjF.25.0670	0.253431	4.17432e-11	3.41334e-07	0.309	0.259	epsin, putative	N/A
1	LmjF.34.1450	0.253146	3.8562e-12	3.15322e-08	0.31	0.257	R3H-associated N-terminal domain containing protein, putative	nucleic acid binding
1	LmjF.26.1550	0.251847	9.53381e-13	7.7958e-09	0.275	0.221	trifunctional enzyme alpha subunit, mitochondrial precursor-like protein	3-hydroxyacyl-CoA dehydrogenase activity;catalytic activity;oxidoreductase activity
1	LmjF.23.0547	0.249902	9.14756e-09	7.47996e-05	0.244	0.204	hypothetical protein, conserved	N/A
1	LmjF.36.2420	0.249604	2.61688e-18	2.13983e-14	0.592	0.524	serine peptidase, Clan SC, Family S9B	serine-type peptidase activity
1	LmjF.35.5160	0.249584	5.14441e-11	4.20658e-07	0.156	0.116	hypothetical protein, conserved	N/A
1	LmjF.26.1340	0.249496	3.73525e-08	0.000305431	0.524	0.501	DNA ligase k alpha, putative	ATP binding;DNA ligase (ATP) activity
1	LmjF.06.0120	0.249065	3.36669e-15	2.75294e-11	0.62	0.581	cyclophilin 2	peptidyl-prolyl cis-trans isomerase activity
1	LmjF.33.1520	0.248926	4.22301e-09	3.45316e-05	0.215	0.176	PRA1 family protein, putative	G protein-coupled receptor activity
1	LmjF.31.0410	0.248705	6.61713e-08	0.000541083	0.247	0.21	calpain-like cysteine peptidase, putative	calcium-dependent cysteine-type endopeptidase activity
1	LmjF.10.1090	0.248567	2.95447e-12	2.41587e-08	0.314	0.26	hypothetical protein, conserved	N/A
1	LmjF.19.0680	0.247506	9.00995e-10	7.36743e-06	0.24	0.196	Flagellum attachment zone protein 7	ATP binding;microtubule binding;microtubule motor activity
1	LmjF.08.0100	0.247406	3.01701e-08	0.000246701	0.216	0.179	kinetoplastid-specific dual specificity phosphatase, putative	phosphatase activity;protein tyrosine phosphatase activity;protein tyrosine/serine/threonine phosphatase activity
1	LmjF.34.2800	0.247369	3.07915e-12	2.51782e-08	0.457	0.409	tuzin, putative	N/A
1	LmjF.36.2210	0.246767	1.12979e-12	9.23833e-09	0.253	0.2	Plasma-membrane choline transporter, putative	transmembrane transporter activity
1	LmjF.30.3030	0.246518	1.07552e-09	8.79449e-06	0.171	0.132	Domain of unknown function DUF21, putative	N/A
1	LmjF.25.0230	0.246207	1.676e-11	1.37047e-07	0.166	0.124	Phosphatase and tensin homolog, putative	phosphatase activity;protein tyrosine/serine/threonine phosphatase activity
1	LmjF.25.1770	0.246069	5.85369e-19	4.78656e-15	0.626	0.573	enoyl-CoA reductase, putative	oxidoreductase activity, acting on the CH-CH group of donors
1	LmjF.30.0890	0.245889	7.87593e-10	6.44015e-06	0.215	0.173	adenosine kinase-like protein	adenosine kinase activity
1	LmjF.25.0600	0.245846	7.47031e-11	6.10848e-07	0.227	0.18	hypothetical protein, conserved	N/A
1	LmjF.15.0210	0.245731	2.22215e-11	1.81706e-07	0.172	0.129	hypothetical protein, conserved	N/A
1	LmjF.11.0350	0.245615	2.50391e-15	2.04744e-11	0.536	0.485	14-3-3 protein 2, putative	N/A
1	LmjF.29.1140	0.2446	3.43897e-12	2.81204e-08	0.177	0.132	tryparedoxin-like protein	N/A
1	LmjF.31.0750	0.244587	6.64548e-11	5.434e-07	0.292	0.241	hypothetical protein, unknown function	N/A
1	LmjF.36.1630	0.244302	8.83686e-12	7.2259e-08	0.439	0.392	clathrin heavy chain, putative	clathrin light chain binding;protein binding;structural molecule activity
1	LmjF.29.2190	0.244257	2.7439e-10	2.24369e-06	0.321	0.274	hypothetical protein, conserved	N/A
1	LmjF.16.0500	0.244256	3.40591e-11	2.78502e-07	0.236	0.188	hypothetical protein, unknown function	N/A
1	LmjF.33.1710	0.243905	4.7329e-09	3.8701e-05	0.249	0.209	CAMK/CAMKL family protein kinase, putative	ATP binding;calcium ion binding;protein kinase activity
1	LmjF.30.1850	0.243785	3.34712e-09	2.73694e-05	0.153	0.118	phosphatidylinositol kinase, putative	kinase activity;metal ion binding
1	LmjF.30.3700	0.24355	1.03176e-11	8.43668e-08	0.12	0.084	hypothetical protein, conserved	N/A
1	LmjF.30.2440	0.243472	5.16214e-12	4.22108e-08	0.179	0.134	hypothetical protein, conserved	protein binding
1	LmjF.10.0630	0.243285	5.34282e-13	4.36882e-09	0.125	0.086	Flagellum adhesion protein 1	N/A
1	LmjF.22.0490	0.241988	5.73995e-12	4.69356e-08	0.223	0.175	glycogen synthase kinase-3 alpha, putative	ATP binding;protein kinase activity
1	LmjF.24.2130	0.241445	2.7327e-10	2.23453e-06	0.361	0.313	ubiquitin-conjugating enzyme E2, putative	N/A
1	LmjF.17.1440	0.24142	5.82005e-08	0.000475905	0.186	0.151	ion transport protein, putative	ion channel activity
1	LmjF.29.0440	0.240764	2.34537e-06	0.0191781	0.256	0.227	kinetoplastid-specific phospho-protein phosphatase, putative	hydrolase activity
1	LmjF.29.1190	0.2395	1.95077e-08	0.000159514	0.171	0.134	Etoposide-induced protein 2.4 (EI24), putative	N/A
1	LmjF.26.0520	0.238943	1.91971e-13	1.56975e-09	0.124	0.084	hypothetical protein, conserved (pseudogene)	N/A
1	LmjF.36.1160	0.238878	1.61295e-11	1.31891e-07	0.166	0.124	AmmeMemoRadiSam system protein B, putative	N/A
1	LmjF.36.0510	0.238064	4.77981e-10	3.90845e-06	0.166	0.127	mitochondrial carrier protein, putative	N/A
1	LmjF.23.0730	0.237813	1.2065e-14	9.86559e-11	0.101	0.063	RNA-binding protein, putative	nucleic acid binding
1	LmjF.10.1250	0.237296	1.59723e-07	0.00130606	0.32	0.285	Protein of unknown function (DUF1861), putative	N/A
1	LmjF.27.1870	0.237217	5.09884e-11	4.16932e-07	0.417	0.37	trypanothione synthetase	N/A
1	LmjF.33.2460	0.236614	9.78315e-12	7.99968e-08	0.239	0.189	Flagellum attachment zone protein 12	N/A
1	LmjF.35.3200	0.235326	1.51069e-11	1.23529e-07	0.355	0.302	RNA-binding protein, putative	nucleic acid binding
1	LmjF.06.0060	0.235044	5.52072e-13	4.51429e-09	0.183	0.135	hypothetical protein, conserved	N/A
1	LmjF.10.0400	0.234998	1.27243e-10	1.04046e-06	0.469	0.427	folate/biopterin transporter, putative	N/A
1	LmjF.19.0260	0.234981	2.10328e-10	1.71985e-06	0.355	0.307	C-terminal motor kinesin, putative	ATP binding;microtubule binding;microtubule motor activity
1	LmjF.26.0660	0.234032	4.2765e-09	3.49689e-05	0.344	0.3	protein disulfide isomerase, putative	protein disulfide isomerase activity
1	LmjF.10.0040	0.233757	8.42419e-09	6.88846e-05	0.269	0.228	Gryzun, putative trafficking through Golgi, putative	N/A
1	LmjF.36.5480	0.23343	1.30646e-08	0.000106829	0.194	0.156	hypothetical protein, conserved	N/A
1	LmjF.28.0700	0.232606	5.41802e-09	4.43032e-05	0.244	0.202	btb/poz domain containing protein, putative	protein binding
1	LmjF.22.1440	0.231657	3.81846e-14	3.12235e-10	0.108	0.07	hypothetical protein, conserved	N/A
1	LmjF.36.1520	0.231531	5.36864e-09	4.38994e-05	0.2	0.161	Serine/threonine-protein kinase NEK17, putative	ATP binding;protein kinase activity
1	LmjF.23.0640	0.231427	1.4098e-12	1.15279e-08	0.517	0.475	hypothetical protein, conserved	N/A
1	LmjF.20.1270	0.230937	4.80887e-09	3.93221e-05	0.173	0.135	Domain of unknown function (DUF1935), putative	N/A
1	LmjF.02.0540	0.230874	1.38785e-09	1.13484e-05	0.192	0.151	hypothetical protein, conserved	N/A
1	LmjF.21.1360	0.230839	6.23935e-10	5.10192e-06	0.184	0.143	hypothetical protein, conserved	N/A
1	LmjF.04.0890	0.23056	5.19309e-07	0.00424639	0.303	0.268	hypothetical protein, conserved	protein binding
1	LmjF.32.1260	0.230408	4.4442e-12	3.63402e-08	0.109	0.073	CRAL/TRIO domain containing protein, putative	N/A
1	LmjF.26.1510	0.230022	1.98036e-07	0.00161934	0.15	0.118	hypothetical protein, unknown function	N/A
1	LmjF.29.0470	0.229744	1.47101e-09	1.20285e-05	0.219	0.176	hypothetical protein, conserved	N/A
1	LmjF.33.3020	0.229683	2.29752e-07	0.00187868	0.196	0.162	hypothetical protein, unknown function	N/A
1	LmjF.05.0580	0.229512	2.99946e-07	0.00245266	0.268	0.233	hypothetical protein, conserved	N/A
1	LmjF.34.0030	0.228873	5.88657e-10	4.81345e-06	0.267	0.221	serine/threonine-protein kinase NAK, putative	ATP binding;protein kinase activity
1	LmjF.36.3530	0.228832	8.31297e-13	6.79751e-09	0.449	0.392	polyubiquitin, putative	protein binding
1	LmjF.17.0950	0.22857	1.18992e-07	0.000972999	0.181	0.147	3'5'-cyclic nucleotide phosphodiesterase, putative	3',5'-cyclic-nucleotide phosphodiesterase activity
1	LmjF.36.6250	0.228122	8.62006e-08	0.000704862	0.135	0.104	small G-protein, putative	GTP binding;GTPase activity
1	LmjF.34.3390	0.22795	1.29025e-10	1.05504e-06	0.231	0.184	hypothetical protein, conserved	N/A
1	LmjF.34.2020	0.227937	3.52219e-07	0.0028801	0.285	0.249	Regulator of chromosome condensation (RCC1) repeat, putative	N/A
1	LmjF.35.3170	0.227577	1.03064e-09	8.42751e-06	0.104	0.073	STE/STE11 serine/threonine-protein kinase, putative	ATP binding;protein kinase activity
1	LmjF.30.3360	0.227502	1.17397e-06	0.00959957	0.304	0.272	calmodulin-related protein, putative	calcium ion binding
1	LmjF.32.0540	0.227386	1.78301e-09	1.45796e-05	0.259	0.215	sulfite exporter TauE/SafE, putative	N/A
1	LmjF.23.1430	0.227059	8.55777e-07	0.00699769	0.203	0.17	DHHC zinc finger domain-like protein	palmitoyltransferase activity
1	LmjF.06.1220	0.226885	1.41671e-09	1.15845e-05	0.16	0.122	hypothetical protein, unknown function	N/A
1	LmjF.31.1240	0.226731	1.04618e-08	8.55462e-05	0.262	0.22	hypothetical protein, conserved	N/A
1	LmjF.24.1770	0.226639	1.86915e-11	1.5284e-07	0.286	0.233	inhibitor of cysteine peptidase	N/A
1	LmjF.35.1510	0.226521	1.78189e-14	1.45705e-10	0.571	0.516	NLI interacting factor-like phosphatase/Zinc finger C-x8-C-x5-C-x3-H type (and similar), putative	metal ion binding
1	LmjF.06.0410	0.226474	7.21192e-07	0.00589718	0.184	0.153	60S ribosomal protein L19, putative	RNA binding;structural constituent of ribosome
1	LmjF.35.4840	0.226141	1.89395e-10	1.54868e-06	0.219	0.174	hypothetical protein, conserved	N/A
1	LmjF.36.3440	0.226122	1.39717e-07	0.00114246	0.256	0.22	Charged multivesicular body protein 3, putative	N/A
1	LmjF.19.0760	0.225807	2.47937e-06	0.0202738	0.21	0.179	transporter, putative	N/A
1	LmjF.24.0430	0.225269	8.99971e-07	0.00735906	0.181	0.15	hypothetical protein, unknown function	N/A
1	LmjF.31.1720	0.225236	7.43365e-09	6.07849e-05	0.308	0.265	Cullin protein neddylation domain containing protein, putative	N/A
1	LmjF.29.0460	0.224323	1.98393e-08	0.000162226	0.156	0.121	hypothetical protein, conserved	N/A
1	LmjF.14.0040	0.224199	3.66008e-08	0.000299285	0.196	0.159	J Biosynthesis Protein 2	ATP binding
1	LmjF.11.0990	0.224098	3.97599e-09	3.25117e-05	0.313	0.27	adaptin-related protein-like protein	N/A
1	LmjF.32.0920	0.22365	8.00548e-07	0.00654608	0.263	0.229	vacuolar proton-ATPase-like protein, putative	proton transmembrane transporter activity
1	LmjF.13.1260	0.223395	1.34657e-12	1.10109e-08	0.15	0.106	hypothetical protein, unknown function	N/A
1	LmjF.06.0420	0.22226	3.37296e-09	2.75807e-05	0.227	0.184	hypothetical protein, conserved	N/A
1	LmjF.34.1320	0.22134	7.18179e-10	5.87255e-06	0.312	0.265	hypothetical protein, conserved	N/A
1	LmjF.23.1170	0.221084	4.61147e-10	3.7708e-06	0.39	0.345	membrane-bound acid phosphatase 2	N/A
1	LmjF.26.2080	0.220658	5.40055e-08	0.000441603	0.217	0.179	hypothetical protein, conserved	N/A
1	LmjF.34.0080	0.220438	7.95164e-10	6.50206e-06	0.361	0.312	glucose-6-phosphate 1-dehydrogenase, putative	NADP binding;glucose-6-phosphate dehydrogenase activity;oxidoreductase activity, acting on CH-OH group of donors
1	LmjF.10.0140	0.220064	4.31014e-09	3.5244e-05	0.321	0.276	DEAD/DEAH box helicase, putative	ATP binding;helicase activity;nucleic acid binding
1	LmjF.33.1535	0.219515	3.36941e-08	0.000275517	0.117	0.087	hypothetical protein	N/A
1	LmjF.27.1480	0.219004	1.55023e-09	1.26763e-05	0.307	0.261	cyclic nucleotide-binding domain containing protein, putative	N/A
1	LmjF.15.0440	0.218879	1.14569e-06	0.00936832	0.118	0.091	tb-292 membrane associated protein-like protein (pseudogene)	N/A
1	LmjF.35.4000	0.218617	2.59981e-08	0.000212586	0.303	0.263	MAP kinase kinase-like protein	ATP binding;protein binding;protein kinase activity;ubiquitin-protein transferase activity
1	LmjF.10.0120	0.218446	6.69263e-09	5.47257e-05	0.142	0.108	PSP1 C-terminal conserved region, putative	N/A
1	LmjF.21.1590	0.218037	7.12816e-08	0.00058287	0.149	0.116	F-box-like, putative	protein binding
1	LmjF.33.0680	0.217839	9.91384e-11	8.10654e-07	0.339	0.288	sterol C-24 reductase, putative	oxidoreductase activity, acting on the CH-CH group of donors, NAD or NADP as acceptor
1	LmjF.32.2470	0.217776	5.32223e-07	0.00435199	0.178	0.145	hypothetical protein, unknown function	N/A
1	LmjF.33.1430	0.217637	1.75662e-09	1.43639e-05	0.114	0.082	hypothetical protein, conserved	N/A
1	LmjF.12.0500	0.217482	5.64575e-08	0.000461653	0.336	0.294	hypothetical protein, unknown function	N/A
1	LmjF.34.3590	0.217354	1.3837e-08	0.000113145	0.16	0.124	phosphatidylinositol 4-kinase, putative	kinase activity
1	LmjF.26.1450	0.21727	3.34318e-09	2.73372e-05	0.193	0.153	hypothetical protein, conserved	N/A
1	LmjF.26.0550	0.21686	2.65232e-06	0.021688	0.241	0.209	galactofuranosyltransferase lpg1-like protein	N/A
1	LmjF.22.1030	0.216514	2.46203e-07	0.0020132	0.185	0.151	hypothetical protein, conserved	protein binding
1	LmjF.04.1120	0.216403	8.12786e-07	0.00664615	0.276	0.241	hypothetical protein, conserved	N/A
1	LmjF.33.1290	0.2163	8.20243e-07	0.00670713	0.211	0.176	hypothetical protein, conserved	N/A
1	LmjF.31.2450	0.215917	1.60581e-07	0.00131307	0.269	0.231	hypothetical protein, unknown function	N/A
1	LmjF.06.0140	0.215601	1.49273e-08	0.00012206	0.409	0.367	20S proteasome beta 6 subunit, putative	threonine-type endopeptidase activity
1	LmjF.28.2110	0.215342	7.07693e-09	5.78681e-05	0.35	0.306	Cullin family/Cullin protein neddylation domain containing protein, putative	ubiquitin protein ligase binding
1	LmjF.28.2510	0.215152	2.70491e-07	0.00221181	0.125	0.096	acyl-CoA dehydrogenase, putative	flavin adenine dinucleotide binding;oxidoreductase activity, acting on the CH-CH group of donors
1	LmjF.14.0480	0.21502	5.20663e-10	4.25746e-06	0.424	0.376	hypothetical protein, unknown function	N/A
1	LmjF.29.1490	0.214973	1.67183e-07	0.00136706	0.203	0.167	asparagine synthase, putative	asparagine synthase (glutamine-hydrolyzing) activity
1	LmjF.06.0950	0.214243	1.58626e-07	0.00129709	0.144	0.112	glucosamine-fructose-6-phosphate aminotransferase, putative	carbohydrate derivative binding;glutamine-fructose-6-phosphate transaminase (isomerizing) activity
1	LmjF.36.0140	0.214133	1.96699e-06	0.0160841	0.177	0.147	hypothetical protein, unknown function	N/A
1	LmjF.29.1660	0.214055	1.35714e-06	0.0110973	0.229	0.197	hypothetical protein, conserved	N/A
1	LmjF.23.0450	0.213919	2.76815e-07	0.00226351	0.223	0.187	permease-like protein	N/A
1	LmjF.09.0910	0.213861	3.86386e-08	0.000315948	0.523	0.493	calmodulin, putative	calcium ion binding
1	LmjF.29.2500	0.213449	5.47164e-08	0.000447416	0.214	0.177	vacuolar protein sorting-associated protein 4	ATP binding;ATPase activity
1	LmjF.36.4850	0.213323	2.16283e-07	0.00176855	0.141	0.111	hypothetical protein, conserved	N/A
1	LmjF.35.0320	0.213226	4.64789e-08	0.000380058	0.129	0.098	serine palmitoyltransferase, putative	catalytic activity;pyridoxal phosphate binding;transferase activity
1	LmjF.36.5900	0.212645	6.88447e-11	5.62943e-07	0.22	0.173	choline/ethanolamine phosphotransferase, putative	phosphotransferase activity, for other substituted phosphate groups
1	LmjF.33.2860	0.212543	1.32058e-07	0.00107984	0.225	0.188	hypothetical protein, conserved	N/A
1	LmjF.34.3070	0.212332	4.91059e-07	0.00401539	0.122	0.094	hypothetical protein, conserved (pseudogene)	N/A
1	LmjF.30.1200	0.212289	4.03683e-08	0.000330091	0.248	0.208	ubiquitin hydrolase, putative	thiol-dependent ubiquitin-specific protease activity
1	LmjF.26.2040	0.211481	2.34285e-10	1.91575e-06	0.18	0.138	PQ loop repeat, putative	N/A
1	LmjF.04.0900	0.211477	2.87277e-06	0.0234906	0.199	0.168	hypothetical protein	N/A
1	LmjF.28.0240	0.211119	6.98365e-08	0.000571053	0.282	0.242	glycerol-3-phosphate dehydrogenase (FAD-dependent), mitochondrial	glycerol-3-phosphate dehydrogenase (quinone) activity;oxidoreductase activity
1	LmjF.36.5850	0.210962	1.98871e-19	1.62617e-15	0.866	0.86	flagellum targeting protein kharon1, putative	N/A
1	LmjF.12.1130	0.210765	4.63461e-07	0.00378972	0.35	0.312	Activating nitroreductase NTR2	FMN binding;catalytic activity;oxidoreductase activity
1	LmjF.16.1640	0.21044	3.36516e-08	0.000275169	0.234	0.195	hypothetical protein, unknown function	protein binding
1	LmjF.32.0220	0.209874	1.57267e-07	0.00128597	0.2	0.165	hypothetical protein, conserved	N/A
1	LmjF.15.0650	0.209487	3.36267e-08	0.000274966	0.282	0.241	hypothetical protein, unknown function	N/A
1	LmjF.10.0483	0.209454	1.62848e-09	1.33161e-05	0.188	0.148	hypothetical protein, unknown function	N/A
1	LmjF.31.1130	0.20907	2.65244e-11	2.1689e-07	0.592	0.552	amidohydrolase, putative	hydrolase activity
1	LmjF.29.1120	0.209042	4.10465e-12	3.35638e-08	0.151	0.109	PSP1 C-terminal conserved region, putative	N/A
1	LmjF.27.2070	0.208987	1.82922e-06	0.0149576	0.216	0.183	hypothetical protein, conserved	N/A
1	LmjF.32.0510	0.208876	1.04062e-06	0.00850915	0.282	0.247	LEM3 (ligand-effect modulator 3) family / CDC50 family, putative	N/A
1	LmjF.11.1090	0.208872	2.0076e-14	1.64161e-10	0.115	0.074	palmitoyl acyltransferase 7, putative	palmitoyltransferase activity
1	LmjF.20.1340	0.208846	1.63254e-06	0.0133493	0.157	0.128	protein kinase, putative	ATP binding;protein kinase activity
1	LmjF.14.0330	0.208782	5.26734e-07	0.0043071	0.107	0.081	transmembrane amino acid transporter protein, putative	N/A
1	LmjF.02.0170	0.208749	8.01434e-09	6.55332e-05	0.198	0.158	phosphoglycan beta 1,3 galactosyltransferase	N/A
1	LmjF.27.1670	0.208416	1.82761e-08	0.000149444	0.258	0.215	molybdopterin synthase sulphurylase-like protein, putative	thiosulfate sulfurtransferase activity;ubiquitin-like modifier activating enzyme activity
1	LmjF.31.3170	0.208368	3.74448e-08	0.000306186	0.31	0.269	major facilitator superfamily, putative	transmembrane transporter activity
1	LmjF.28.0480	0.20802	3.51921e-08	0.000287766	0.265	0.225	carbonic anhydrase-like protein	carbonate dehydratase activity;zinc ion binding
1	LmjF.36.5140	0.207434	7.37738e-07	0.00603248	0.275	0.24	VHS domain containing protein, putative	N/A
1	LmjF.21.1490	0.206821	1.81265e-09	1.4822e-05	0.157	0.119	hypothetical protein, unknown function	N/A
1	LmjF.36.5150	0.206819	5.21715e-06	0.0426606	0.238	0.207	kinesin-D	ATP binding;microtubule binding;microtubule motor activity
1	LmjF.28.0490	0.206817	1.6564e-06	0.0135444	0.232	0.199	propionyl-coa carboxylase beta chain, putative	ligase activity
1	LmjF.21.1565	0.20676	5.19537e-09	4.24826e-05	0.213	0.172	NIMA-related kinase, putative	ATP binding;protein kinase activity
1	LmjF.18.0590	0.206745	3.95335e-06	0.0323266	0.136	0.109	RNA binding protein, putative	nucleic acid binding
1	LmjF.18.1040	0.206375	6.66244e-08	0.000544787	0.335	0.293	5-oxoprolinase, putative	catalytic activity;hydrolase activity
1	LmjF.06.0790	0.205656	4.93918e-08	0.000403877	0.154	0.12	hypothetical protein, unknown function	N/A
1	LmjF.34.2360	0.205011	5.63126e-06	0.0460468	0.209	0.179	hypothetical protein, conserved	N/A
1	LmjF.18.1100	0.204678	4.70502e-08	0.00038473	0.231	0.192	Ankyrin repeats (3 copies), putative	protein binding
1	LmjF.34.2476	0.204488	2.14504e-07	0.001754	0.176	0.142	hypothetical protein, conserved	N/A
1	LmjF.20.1300	0.204231	4.34711e-07	0.00355463	0.28	0.243	small myristoylated protein-2	N/A
1	LmjF.17.0480	0.203365	4.63429e-09	3.78945e-05	0.232	0.19	Phenazine biosynthesis-like protein, putative	catalytic activity
1	LmjF.30.0040	0.20318	1.01228e-09	8.27744e-06	0.11	0.078	Uncharacterised protein family (UPF0220), putative	N/A
1	LmjF.09.0400	0.202668	2.04196e-07	0.00166971	0.341	0.304	kinetoplastid kinetochore protein 10, putative	ATP binding;protein kinase activity
1	LmjF.17.0060	0.202396	4.92977e-07	0.00403107	0.164	0.132	calcium/calmodulin-dependent protein kinase, putative	ATP binding;protein binding;protein kinase activity
1	LmjF.36.6690	0.202012	4.41564e-07	0.00361067	0.201	0.167	f2o10.10 protein-like protein	N/A
1	LmjF.31.1860	0.202006	5.14362e-10	4.20594e-06	0.52	0.48	hypothetical protein, unknown function	N/A
1	LmjF.30.2400	0.201871	1.63362e-07	0.00133581	0.347	0.309	Present in the outer mitochondrial membrane proteome 31	N/A
1	LmjF.30.0770	0.201712	5.47021e-06	0.0447299	0.243	0.212	hypothetical protein, conserved	N/A
1	LmjF.08.0370	0.201604	2.65991e-06	0.0217501	0.253	0.221	hypothetical protein, conserved	N/A
1	LmjF.14.1160	0.201192	5.30208e-12	4.33551e-08	0.723	0.685	enolase	magnesium ion binding;phosphopyruvate hydratase activity
1	LmjF.11.0750	0.200764	2.44012e-08	0.000199528	0.205	0.166	hypothetical protein, conserved	N/A
1	LmjF.36.5460	0.199997	5.37861e-10	4.39809e-06	0.225	0.179	L-2-hydroxyglutarate dehydrogenase, mitochondrial, putative	oxidoreductase activity
1	LmjF.29.1060	0.199923	3.79197e-06	0.0310069	0.237	0.205	hypothetical protein, conserved	N/A
1	LmjF.10.0620	0.199702	5.03684e-06	0.0411863	0.2	0.169	FLA1-binding protein	N/A
1	LmjF.29.1260	0.199603	2.23739e-07	0.00182951	0.259	0.221	Wnt-binding factor required for Wnt secretion/Lipase (class 3), putative	N/A
1	LmjF.30.2940	0.198753	1.10583e-06	0.00904237	0.172	0.14	hypothetical protein, conserved	N/A
1	LmjF.36.6570	0.198684	9.01561e-07	0.00737206	0.463	0.437	y113g7b.23 protein-like protein	N/A
1	LmjF.29.1520	0.198462	3.64417e-06	0.0297984	0.191	0.16	major facilitator superfamily, putative	transmembrane transporter activity
1	LmjF.30.2230	0.198409	1.82918e-08	0.000149572	0.225	0.184	hypothetical protein, unknown function	N/A
1	LmjF.06.1180	0.198081	3.31174e-08	0.000270801	0.334	0.29	Nuclear Dbf2-related kinase	ATP binding;protein kinase activity
1	LmjF.19.0985	0.19758	6.66579e-08	0.000545062	0.284	0.244	4-coumarate:coa ligase-like protein	N/A
1	LmjF.30.0800	0.196149	2.5477e-08	0.000208326	0.236	0.195	rac serine-threonine kinase, putative	ATP binding;protein kinase activity;protein serine/threonine kinase activity
1	LmjF.20.1170	0.195751	2.43266e-09	1.98918e-05	0.1	0.07	endo-1,4-beta-xylanase z precursor-like protein	N/A
1	LmjF.31.1030	0.195575	6.13794e-09	5.019e-05	0.536	0.502	hypothetical protein, conserved	nucleic acid binding
1	LmjF.27.1370	0.195551	1.16423e-07	0.000951989	0.196	0.159	STE/STE11 serine/threonine-protein kinase, putative	ATP binding;protein kinase activity
1	LmjF.34.3952	0.195131	3.20686e-07	0.00262225	0.113	0.085	hypothetical protein	N/A
1	LmjF.12.0390	0.194945	2.72828e-07	0.00223091	0.184	0.149	hypothetical protein, conserved	N/A
1	LmjF.35.3630	0.194689	2.14039e-06	0.0175019	0.286	0.251	membrane transporter protein, putative	antiporter activity;xenobiotic transmembrane transporter activity
1	LmjF.16.0260	0.194604	9.65963e-08	0.000789868	0.175	0.14	Ankyrin repeats (many copies)/Alpha/beta hydrolase family, putative	protein binding
1	LmjF.30.0860	0.194297	5.83707e-18	4.77297e-14	0.746	0.696	surface protein amastin, putative	N/A
1	LmjF.24.0700	0.194156	4.4822e-07	0.00366509	0.12	0.092	hypothetical predicted multi-pass transmembrane protein	N/A
1	LmjF.34.2200	0.193764	1.90543e-06	0.0155807	0.359	0.324	thioredoxin, putative	N/A
1	LmjF.18.0280	0.192972	9.33884e-08	0.000763637	0.29	0.249	hypothetical protein, conserved	N/A
1	LmjF.32.3390	0.192882	8.43326e-07	0.00689588	0.26	0.224	hypothetical protein, conserved	N/A
1	LmjF.29.1600	0.192606	5.22106e-08	0.000426926	0.324	0.281	endomembrane protein 70, putative	N/A
1	LmjF.36.5440	0.191988	5.64901e-06	0.0461919	0.168	0.14	SEP domain containing protein, putative	protein binding
1	LmjF.24.2060	0.191554	2.73719e-06	0.022382	0.264	0.231	transketolase	catalytic activity;transketolase activity
1	LmjF.35.4260	0.191553	1.48397e-06	0.0121344	0.201	0.168	predicted zinc finger protein	metal ion binding
1	LmjF.02.0460	0.191534	8.86935e-10	7.25246e-06	0.534	0.495	Mitochondrial outer membrane protein porin, putative	voltage-gated anion channel activity
1	LmjF.16.1420	0.191021	2.31263e-06	0.0189103	0.336	0.302	hypothetical protein, conserved	N/A
1	LmjF.24.1125	0.190709	1.27651e-08	0.00010438	0.146	0.112	hypothetical protein, conserved	N/A
1	LmjF.33.2110	0.190659	1.7916e-08	0.0001465	0.174	0.137	phosphoglycerate mutase, putative	N/A
1	LmjF.07.0770	0.189563	5.8116e-08	0.000475214	0.325	0.285	DNAJ-domain transmembrane-like protein	N/A
1	LmjF.13.1570	0.189492	3.5316e-09	2.88779e-05	0.134	0.1	kinetoplastid-specific phospho-protein phosphatase, putative	hydrolase activity
1	LmjF.21.1810	0.189464	9.54648e-09	7.80616e-05	0.172	0.135	GPI transamidase component GAA1, putative	N/A
1	LmjF.33.2290	0.187706	1.50396e-06	0.0122979	0.143	0.114	STE/STE11 serine/threonine-protein kinase, putative	ATP binding;protein kinase activity
1	LmjF.23.1665	0.187686	3.59096e-07	0.00293633	0.131	0.101	PAP2 superfamily, putative	hydrolase activity
1	LmjF.33.1260	0.187437	1.85585e-07	0.00151753	0.225	0.187	hypothetical protein, conserved	N/A
1	LmjF.18.0130	0.186769	4.41746e-06	0.0361216	0.259	0.224	Domain of unknown function DUF21, putative	N/A
1	LmjF.27.0790	0.186116	8.64478e-07	0.00706883	0.122	0.094	MatE, putative	antiporter activity;xenobiotic transmembrane transporter activity
1	LmjF.28.0990	0.185045	1.46576e-07	0.00119856	0.16	0.126	Serine incorporator (Serinc), putative	N/A
1	LmjF.03.0950	0.18403	1.9548e-06	0.0159844	0.294	0.26	multicopper oxidase, putative	copper ion binding;oxidoreductase activity
1	LmjF.35.2680	0.183915	1.49866e-06	0.0122545	0.177	0.145	heat shock factor binding protein 1, putative	transcription corepressor activity
1	LmjF.34.3660	0.183048	2.52132e-09	2.06169e-05	0.57	0.537	transmembrane/endomembrane-like protein	N/A
1	LmjF.21.0240	0.182932	3.6423e-19	2.97831e-15	0.803	0.774	hexokinase, putative	ATP binding;glucose binding;hexokinase activity;phosphotransferase activity, alcohol group as acceptor
1	LmjF.14.0560	0.182831	3.36261e-09	2.7496e-05	0.112	0.08	hypothetical protein, unknown function	N/A
1	LmjF.36.5130	0.182265	3.27264e-06	0.0267604	0.323	0.286	hypothetical protein, conserved	N/A
1	LmjF.34.1245	0.182132	5.43269e-09	4.44231e-05	0.239	0.194	hypothetical protein, conserved	N/A
1	LmjF.22.0130	0.181023	1.08932e-09	8.90734e-06	0.122	0.087	hypothetical protein, conserved	N/A
1	LmjF.16.1140	0.180516	5.13388e-06	0.0419797	0.176	0.146	WW domain containing protein, putative	protein binding
1	LmjF.16.0570	0.180331	6.45426e-08	0.000527765	0.51	0.469	histone H3	DNA binding;protein heterodimerization activity
1	LmjF.17.0390	0.180173	2.45023e-09	2.00355e-05	0.101	0.071	STE group serine/threonine-protein kinase, putative	ATP binding;protein kinase activity
1	LmjF.34.0500	0.180146	1.09697e-06	0.00896994	0.432	0.397	amastin-like protein	N/A
1	LmjF.35.2720	0.179682	3.12204e-06	0.025529	0.192	0.16	QA-SNARE protein putative	N/A
1	LmjF.32.3850	0.17958	3.67592e-06	0.030058	0.239	0.206	hypothetical protein, unknown function	N/A
1	LmjF.32.2520	0.179183	5.11796e-07	0.00418496	0.206	0.17	hypothetical protein, unknown function	N/A
1	LmjF.31.1850	0.178663	8.10968e-07	0.00663128	0.254	0.218	hypothetical protein, unknown function	N/A
1	LmjF.36.1370	0.178448	3.79735e-06	0.0310509	0.487	0.461	Valosin-containing protein, putative	ATP binding;ATPase activity;hydrolase activity
1	LmjF.13.0440	0.178227	1.00404e-06	0.00821007	0.308	0.269	mitogen-activated protein kinase kinase 2	ATP binding;protein binding;protein kinase activity
1	LmjF.27.0770	0.178055	4.19279e-08	0.000342844	0.137	0.104	Flagella connector protein 1	N/A
1	LmjF.36.1940	0.177728	2.69779e-69	2.20598e-65	0.998	0.994	inosine-guanosine transporter	nucleoside transmembrane transporter activity
1	LmjF.31.0360	0.177711	4.55811e-07	0.00372716	0.328	0.291	CRAL/TRIO domain containing protein, putative	N/A
1	LmjF.10.0090	0.177633	1.78661e-14	1.46091e-10	0.165	0.117	dehydrogenase-like protein	N/A
1	LmjF.31.1165	0.17755	6.72541e-07	0.00549937	0.251	0.214	hypothetical protein	N/A
1	LmjF.25.0710	0.177171	1.41385e-06	0.0115611	0.244	0.209	SCAMP family, putative	N/A
1	LmjF.10.0200	0.176961	1.18108e-06	0.00965768	0.437	0.405	Mitogen-activated protein kinase 10, putative	ATP binding;protein kinase activity
1	LmjF.14.0940	0.176639	1.31194e-07	0.00107277	0.133	0.101	hypothetical protein, conserved	N/A
1	LmjF.30.0270	0.175724	3.95618e-07	0.00323497	0.16	0.127	AUT2/APG4/ATG4 cysteine peptidase, putative	N/A
1	LmjF.21.1680	0.175641	2.62172e-08	0.000214378	0.298	0.255	pumillio protein 3, putative	RNA binding
1	LmjF.36.4680	0.174782	4.27584e-06	0.0349635	0.432	0.401	hypothetical protein, conserved	N/A
1	LmjF.06.0010	0.174467	7.8149e-31	6.39024e-27	0.947	0.922	histone H4	DNA binding;protein heterodimerization activity
1	LmjF.08.0620	0.173917	1.23106e-06	0.0100663	0.14	0.111	hypothetical protein, conserved	N/A
1	LmjF.35.3330	0.173367	2.9183e-06	0.0238629	0.138	0.111	mitochondrial carrier protein, putative	N/A
1	LmjF.32.1430	0.173208	2.17017e-06	0.0177455	0.159	0.129	hypothetical protein, conserved	N/A
1	LmjF.06.0260	0.172811	1.2346e-06	0.0100954	0.372	0.336	5'-3' exoribonuclease A, putative	5'-3' exonuclease activity;exonuclease activity;nucleic acid binding
1	LmjF.26.0030	0.17138	3.64599e-06	0.0298133	0.199	0.167	pyridoxal phosphate containing glycine decarboxylase, putative	catalytic activity;glycine dehydrogenase (decarboxylating) activity
1	LmjF.28.0560	0.171348	4.19073e-06	0.0342676	0.266	0.233	hypothetical protein, conserved	N/A
1	LmjF.21.0830	0.17123	4.36308e-06	0.0356769	0.215	0.182	hypothetical protein, conserved	N/A
1	LmjF.35.0370	0.171084	1.83467e-10	1.50021e-06	0.426	0.37	ATP-dependent DEAD-box RNA helicase, putative	ATP binding;helicase activity;nucleic acid binding
1	LmjF.22.0190	0.170925	2.68671e-07	0.00219692	0.221	0.183	hypothetical protein, conserved	N/A
1	LmjF.25.2210	0.170219	1.04824e-06	0.00857147	0.261	0.224	hypothetical protein, conserved	protein binding
1	LmjF.28.1650	0.169722	5.54065e-06	0.0453059	0.222	0.19	Flagellum attachment zone protein 20	ATP binding;protein kinase activity
1	LmjF.35.0920	0.168304	6.08585e-06	0.049764	0.347	0.313	hypothetical protein, conserved	N/A
1	LmjF.11.0120	0.167479	4.51966e-06	0.0369573	0.33	0.294	hypothetical protein, conserved	N/A
1	LmjF.19.0270	0.166211	1.5831e-06	0.012945	0.177	0.145	hypothetical protein, conserved	N/A
1	LmjF.29.0510	0.165264	1.27152e-07	0.00103972	0.539	0.502	ADF/Cofilin	actin binding
1	LmjF.19.0150	0.164033	4.29565e-07	0.00351255	0.323	0.284	mitogen-activated protein kinase kinase kinase, putative	ATP binding;protein kinase activity
1	LmjF.36.1265	0.163124	1.28433e-14	1.0502e-10	0.849	0.834	hypothetical protein	N/A
1	LmjF.14.1150	0.159287	1.34707e-06	0.011015	0.11	0.084	tub family protein-like protein	N/A
1	LmjF.33.3180	0.158446	5.60635e-06	0.0458431	0.195	0.163	hypothetical protein, conserved	N/A
1	LmjF.maxi	0.158027	1.0994e-54	8.98983e-51	0.97	0.938	NA	NA
1	LmjF.31.0450	0.157876	9.9281e-11	8.11821e-07	0.745	0.728	amastin, putative	N/A
1	LmjF.11.0250	0.156395	5.16865e-07	0.00422641	0.101	0.075	Calcium/calmodulin-dependent protein kinase kinase, putative	ATP binding;protein kinase activity
1	LmjF.32.3590	0.155036	4.72775e-07	0.00386588	0.111	0.084	hypothetical protein, conserved	N/A
1	LmjF.36.2380	0.154929	1.76186e-08	0.000144067	0.574	0.536	sterol 24-c-methyltransferase, putative	methyltransferase activity
1	LmjF.03.0290	0.15488	3.69078e-06	0.0301795	0.182	0.151	hypothetical protein, unknown function (pseudogene)	N/A
1	LmjF.35.3100	0.147779	2.44041e-12	1.99553e-08	0.768	0.725	ATP-dependent RNA helicase, putative	ATP binding;helicase activity;nucleic acid binding
1	LmjF.29.0820	0.141698	1.34456e-15	1.09945e-11	0.731	0.67	CPC cysteine peptidase, Clan CA, family C1, Cathepsin B-like	cysteine-type peptidase activity
1	LmjF.18.0430	0.135273	1.53239e-06	0.0125303	0.115	0.088	hypothetical protein, unknown function	N/A
1	LmjF.35.0820	0.115883	8.06651e-07	0.00659598	0.6	0.567	aspartate aminotransferase, putative	catalytic activity;pyridoxal phosphate binding;transaminase activity
2	LmjF.35.0420	1.01273	0	0	0.899	0.661	40S ribosomal protein S3A, putative	structural constituent of ribosome
2	LmjF.27.0680	0.985233	0	0	0.977	0.85	amino acid permease, putative	N/A
2	LmjF.16.1470	0.94252	1.35297e-188	1.10632e-184	0.57	0.29	kinesin, putative	ATP binding;microtubule binding;microtubule motor activity
2	LmjF.35.1900	0.906711	0	0	0.905	0.677	60S ribosomal protein L5, putative	5S rRNA binding;structural constituent of ribosome
2	LmjF.07.0510	0.86965	0	0	0.898	0.707	60S ribosomal protein L7a, putative	N/A
2	LmjF.30.3340	0.863812	2.8581e-266	2.33707e-262	0.864	0.654	60S ribosomal protein L9, putative	rRNA binding;structural constituent of ribosome
2	LmjF.09.1340	0.834938	0	0	0.967	0.914	histone H2B	DNA binding;protein heterodimerization activity
2	LmjF.21.1050	0.814479	3.01429e-247	2.46478e-243	0.832	0.556	60S ribosomal protein L9, putative	rRNA binding;structural constituent of ribosome
2	LmjF.16.0460	0.812728	1.39617e-232	1.14165e-228	0.811	0.528	60S ribosomal protein L21, putative	structural constituent of ribosome
2	LmjF.36.0660	0.812452	4.02687e-224	3.29277e-220	0.608	0.276	Enriched in surface-labeled proteome protein 18	N/A
2	LmjF.30.0290	0.803202	1.40979e-194	1.15279e-190	0.483	0.201	hypothetical protein, unknown function	N/A
2	LmjF.29.1740	0.802322	0	0	0.973	0.939	histone H2A, putative	DNA binding;protein heterodimerization activity
2	LmjF.35.1910	0.800578	7.09136e-212	5.79861e-208	0.864	0.661	ribosomal protein L15, putative	structural constituent of ribosome
2	LmjF.13.0560	0.786574	8.76133e-200	7.16414e-196	0.812	0.551	60S ribosomal protein L18, putative	structural constituent of ribosome
2	LmjF.26.2330	0.781269	4.86169e-257	3.9754e-253	0.888	0.67	60S ribosomal protein L35, putative	structural constituent of ribosome
2	LmjF.26.0180	0.779487	8.28965e-203	6.77845e-199	0.823	0.574	60S ribosomal protein L7, putative	structural constituent of ribosome
2	LmjF.18.1400	0.768745	3.49948e-175	2.86152e-171	0.786	0.535	60S ribosomal protein L34, putative	structural constituent of ribosome
2	LmjF.07.1160	0.766412	1.01082e-200	8.2655e-197	0.875	0.655	amino acid transporter 19, putative	N/A
2	LmjF.07.0500	0.762904	3.19418e-207	2.61188e-203	0.835	0.581	60S ribosomal protein L7a, putative	N/A
2	LmjF.27.1080	0.757533	9.04708e-89	7.3978e-85	0.581	0.39	hypothetical protein, conserved	protein binding
2	LmjF.26.1340	0.754039	1.26218e-105	1.03209e-101	0.669	0.472	DNA ligase k alpha, putative	ATP binding;DNA ligase (ATP) activity
2	LmjF.24.2050	0.739205	1.02734e-186	8.40059e-183	0.816	0.572	60S ribosomal protein L26, putative	RNA binding;structural constituent of ribosome
2	LmjF.15.0010	0.737793	3.94027e-187	3.22196e-183	0.838	0.631	histone H4	DNA binding;protein heterodimerization activity
2	LmjF.04.0470	0.732055	1.18475e-176	9.68768e-173	0.75	0.465	60S ribosomal protein L11 (L5, L16)	structural constituent of ribosome
2	LmjF.21.0730	0.725824	1.57494e-141	1.28783e-137	0.539	0.278	60S ribosomal protein L36, putative	structural constituent of ribosome
2	LmjF.31.0900	0.724594	1.39602e-260	1.14153e-256	0.921	0.784	hypothetical protein, conserved	N/A
2	LmjF.35.1890	0.710791	4.29888e-220	3.51519e-216	0.88	0.671	60S ribosomal protein L5, putative	5S rRNA binding;structural constituent of ribosome
2	LmjF.24.2210	0.705008	5.7873e-148	4.73227e-144	0.766	0.532	60S ribosomal protein L12, putative	structural constituent of ribosome
2	LmjF.36.1925	0.704833	1.26336e-158	1.03305e-154	0.762	0.505	60S ribosomal protein L37a	structural constituent of ribosome
2	LmjF.24.2080	0.686807	2.12562e-187	1.73812e-183	0.875	0.682	40S ribosomal protein S8, putative	structural constituent of ribosome
2	LmjF.34.2780	0.683239	5.17674e-174	4.23302e-170	0.84	0.629	40S ribosomal protein S19 protein, putative	structural constituent of ribosome
2	LmjF.26.2550	0.682335	8.09655e-175	6.62055e-171	0.514	0.232	hypothetical protein, conserved	N/A
2	LmjF.31.1900	0.678285	8.01922e-136	6.55732e-132	0.742	0.486	ubiquitin-fusion protein	protein binding;structural constituent of ribosome
2	LmjF.19.0390	0.674703	3.62134e-185	2.96117e-181	0.877	0.708	40S ribosomal protein S13, putative	structural constituent of ribosome
2	LmjF.15.0200	0.672764	9.12487e-167	7.46141e-163	0.818	0.587	60S ribosomal protein L13a, putative	structural constituent of ribosome
2	LmjF.04.0760	0.672084	1.96328e-194	1.60537e-190	0.885	0.682	nascent polypeptide associated complex subunit- like protein, copy 2	N/A
2	LmjF.32.3130	0.665822	5.51001e-204	4.50554e-200	0.878	0.683	ribosomal protein L3, putative	structural constituent of ribosome
2	LmjF.27.1240	0.663703	1.25381e-166	1.02524e-162	0.849	0.641	histone H1, putative	N/A
2	LmjF.35.1920	0.663511	2.14015e-106	1.75e-102	0.643	0.408	60S ribosomal protein L36, putative	structural constituent of ribosome
2	LmjF.35.3790	0.658749	1.26183e-126	1.0318e-122	0.66	0.406	60S ribosomal protein L23, putative	structural constituent of ribosome
2	LmjF.36.3530	0.654986	1.70438e-170	1.39367e-166	0.661	0.351	polyubiquitin, putative	protein binding
2	LmjF.36.3740	0.654326	9.91111e-114	8.10432e-110	0.744	0.524	60S ribosomal protein L34, putative	structural constituent of ribosome
2	LmjF.21.1480	0.653999	2.88035e-80	2.35526e-76	0.576	0.388	hypothetical protein, conserved	N/A
2	LmjF.35.1670	0.640388	3.63921e-145	2.97578e-141	0.65	0.37	60S ribosomal protein L26, putative	RNA binding;structural constituent of ribosome
2	LmjF.30.3200	0.6398	2.45974e-125	2.01133e-121	0.687	0.437	ribosomal protein S26, putative	structural constituent of ribosome
2	LmjF.11.1190	0.62909	2.31157e-159	1.89017e-155	0.866	0.663	40S ribosomal protein S15A, putative	structural constituent of ribosome
2	LmjF.20.0030	0.62206	2.12898e-86	1.74087e-82	0.533	0.334	Histone-lysine N-methyltransferase, H3 lysine-76 specific	histone methyltransferase activity (H3-K79 specific);histone-lysine N-methyltransferase activity
2	LmjF.35.1440	0.614285	8.97366e-146	7.33776e-142	0.833	0.624	60S ribosomal protein L2, putative	structural constituent of ribosome
2	LmjF.07.0680	0.610519	1.07431e-163	8.78464e-160	0.858	0.673	40S ribosomal protein S9, putative	RNA binding;rRNA binding;structural constituent of ribosome
2	LmjF.28.0540	0.598756	3.46989e-120	2.83733e-116	0.697	0.448	ribosomal protein S26, putative	structural constituent of ribosome
2	LmjF.04.0750	0.597689	3.13858e-130	2.56642e-126	0.836	0.641	60S ribosomal protein L10, putative	structural constituent of ribosome
2	LmjF.20.1650	0.588519	1.54101e-140	1.26008e-136	0.851	0.663	ribosomal protein S11 homolog	structural constituent of ribosome
2	LmjF.35.3800	0.583932	5.80218e-136	4.74445e-132	0.82	0.605	60S ribosomal protein L23, putative	structural constituent of ribosome
2	LmjF.35.2010	0.581437	4.7628e-160	3.89454e-156	0.903	0.783	40S ribosomal protein S6, putative	structural constituent of ribosome
2	LmjF.29.2860	0.580283	1.75541e-99	1.4354e-95	0.591	0.356	40S ribosomal protein S19-like protein	structural constituent of ribosome
2	LmjF.34.3650	0.579363	1.31079e-110	1.07183e-106	0.82	0.628	60S ribosomal protein L21, putative	structural constituent of ribosome
2	LmjF.31.0350	0.578684	1.29228e-85	1.0567e-81	0.912	0.805	amino acid transporter aATP11, putative	N/A
2	LmjF.06.0415	0.578017	9.27768e-139	7.58636e-135	0.84	0.631	60S ribosomal protein L19, putative	RNA binding;structural constituent of ribosome
2	LmjF.10.0070	0.576023	4.50948e-96	3.6874e-92	0.627	0.391	ribosomal protein l35a, putative	structural constituent of ribosome
2	LmjF.32.3900	0.57299	2.6195e-129	2.14196e-125	0.828	0.621	60S ribosomal protein L8, putative	structural constituent of ribosome
2	LmjF.32.2690	0.570917	1.52237e-126	1.24484e-122	0.806	0.58	ribosomal protein L27, putative	structural constituent of ribosome
2	LmjF.06.0010	0.570602	6.69243e-194	5.4724e-190	0.963	0.92	histone H4	DNA binding;protein heterodimerization activity
2	LmjF.30.3650	0.568686	1.17144e-91	9.57887e-88	0.757	0.551	ribosomal protein L15, putative	structural constituent of ribosome
2	LmjF.29.1800	0.555874	1.27878e-100	1.04566e-96	0.77	0.57	40S ribosomal protein S15A, putative	structural constituent of ribosome
2	LmjF.36.1250	0.55402	6.37488e-107	5.21274e-103	0.752	0.528	40S ribosomal protein S9, putative	RNA binding;rRNA binding;structural constituent of ribosome
2	LmjF.14.1270	0.547706	5.39655e-102	4.41276e-98	0.839	0.668	ubiquitin/ribosomal protein S27a, putative	protein binding;structural constituent of ribosome
2	LmjF.31.1220	0.546465	8.86829e-96	7.2516e-92	0.744	0.528	Pyrophosphate-energized vacuolar membrane proton pump 1, putative	inorganic diphosphatase activity;pyrophosphate hydrolysis-driven proton transmembrane transporter activity
2	LmjF.23.1267	0.54402	1.38739e-129	1.13447e-125	0.445	0.207	hypothetical protein, unknown function	N/A
2	LmjF.36.0990	0.543109	5.04144e-97	4.12238e-93	0.738	0.518	40S ribosomal protein S10, putative	N/A
2	LmjF.11.0960	0.541232	1.11353e-135	9.10536e-132	0.867	0.68	40S ribosomal protein S5	structural constituent of ribosome
2	LmjF.33.0920	0.538987	1.06949e-116	8.74524e-113	0.846	0.661	40S ribosomal protein S3, putative	RNA binding;structural constituent of ribosome
2	LmjF.36.3770	0.532299	1.45951e-107	1.19344e-103	0.822	0.637	transcription factor BTF3, putative	N/A
2	LmjF.04.0950	0.530698	2.28232e-147	1.86625e-143	0.925	0.802	60S ribosomal protein L10, putative	structural constituent of ribosome
2	LmjF.33.0720	0.528299	2.02676e-107	1.65728e-103	0.879	0.751	60S ribosomal protein L6, putative	structural constituent of ribosome
2	LmjF.36.3400	0.522858	6.25733e-91	5.11662e-87	0.615	0.38	ribosomal protein L29, putative	structural constituent of ribosome
2	LmjF.24.0040	0.521585	2.232e-109	1.8251e-105	0.367	0.167	60S ribosomal protein L17, putative	structural constituent of ribosome
2	LmjF.11.0760	0.519455	2.10485e-126	1.72114e-122	0.894	0.758	40S ribosomal protein S21, putative	structural constituent of ribosome
2	LmjF.30.0850	0.51857	7.15968e-116	5.85447e-112	0.765	0.503	surface protein amastin, putative	N/A
2	LmjF.34.2900	0.510074	5.39701e-146	4.41314e-142	0.277	0.093	ribosomal protein L3, putative	structural constituent of ribosome
2	LmjF.07.0025	0.509663	6.51613e-90	5.32824e-86	0.621	0.393	histone-lysine N-methyltransferase, putative	histone methyltransferase activity (H3-K79 specific);histone-lysine N-methyltransferase activity
2	LmjF.23.1290	0.507659	3.71882e-121	3.04088e-117	0.54	0.278	hypothetical protein, unknown function	N/A
2	LmjF.36.5120	0.504479	9.28195e-134	7.58985e-130	0.923	0.824	40S ribosomal protein SA, putative	structural constituent of ribosome
2	LmjF.24.1720	0.504361	6.19018e-97	5.06171e-93	0.309	0.138	cell division cycle protein 20, putative	anaphase-promoting complex binding;protein binding;ubiquitin-protein transferase activator activity
2	LmjF.23.0840	0.504085	2.29129e-129	1.87359e-125	0.462	0.213	hypothetical protein, unknown function	N/A
2	LmjF.28.2560	0.502803	3.24672e-98	2.65484e-94	0.779	0.564	40S ribosomal protein S17, putative	structural constituent of ribosome
2	LmjF.07.0990	0.497117	2.50058e-97	2.04472e-93	0.88	0.724	nucleolar RNA-binding protein, putative	N/A
2	LmjF.36.4510	0.495697	5.64936e-103	4.61949e-99	0.842	0.644	60S ribosomal protein L18, putative	structural constituent of ribosome
2	LmjF.36.1070	0.494421	5.25451e-72	4.29661e-68	0.614	0.403	ribosomal protein L24, putative	N/A
2	LmjF.11.0970	0.493027	7.51191e-117	6.14249e-113	0.878	0.745	40S ribosomal protein S5	structural constituent of ribosome
2	LmjF.11.0720	0.49238	8.13514e-63	6.6521e-59	0.493	0.31	PUF nine target 1	N/A
2	LmjF.10.0540	0.486759	1.45692e-109	1.19133e-105	0.711	0.443	hypothetical protein, unknown function	N/A
2	LmjF.28.0960	0.483259	8.51247e-104	6.96065e-100	0.876	0.734	40S ribosomal protein S14	structural constituent of ribosome
2	LmjF.21.1720	0.482539	2.50571e-73	2.04892e-69	0.623	0.409	60S ribosomal protein L32	structural constituent of ribosome
2	LmjF.31.1510	0.479288	3.34841e-99	2.738e-95	0.373	0.177	hypothetical protein, conserved	N/A
2	LmjF.35.3760	0.478796	5.0084e-65	4.09537e-61	0.545	0.347	60S ribosomal protein L27A/L29, putative	structural constituent of ribosome
2	LmjF.32.2660	0.474171	1.03779e-170	8.48598e-167	0.975	0.925	L-Lysine transport protein, putative	N/A
2	LmjF.28.0980	0.473891	1.34551e-125	1.10022e-121	0.371	0.156	P27 protein, putative	N/A
2	LmjF.29.1270	0.473081	8.39171e-110	6.8619e-106	0.38	0.172	Heat shock protein 100 kDa	ATP binding;ATPase activity
2	LmjF.06.0410	0.468466	3.92164e-111	3.20672e-107	0.311	0.128	60S ribosomal protein L19, putative	RNA binding;structural constituent of ribosome
2	LmjF.18.0620	0.467478	4.00417e-111	3.27421e-107	0.868	0.693	60S ribosomal protein L10a, putative	RNA binding;structural constituent of ribosome
2	LmjF.09.0060	0.462686	4.5348e-93	3.70811e-89	0.851	0.68	RNA-binding protein 5, putative	nucleic acid binding
2	LmjF.09.0600	0.457708	2.04699e-90	1.67383e-86	0.653	0.405	cyclin 1	serine-type peptidase activity
2	LmjF.32.2710	0.452428	3.05659e-104	2.49937e-100	0.907	0.775	ribosomal protein L27, putative	structural constituent of ribosome
2	LmjF.34.2470	0.444467	1.61542e-66	1.32093e-62	0.794	0.625	ribosomal protein l35a, putative	structural constituent of ribosome
2	LmjF.35.3290	0.443332	1.89209e-71	1.54716e-67	0.755	0.547	60S ribosomal subunit protein L31, putative	structural constituent of ribosome
2	LmjF.36.0980	0.441232	9.62536e-74	7.87065e-70	0.645	0.426	40S ribosomal protein S10, putative	N/A
2	LmjF.29.0820	0.441072	4.97628e-102	4.06911e-98	0.861	0.645	CPC cysteine peptidase, Clan CA, family C1, Cathepsin B-like	cysteine-type peptidase activity
2	LmjF.31.0680	0.440598	1.9417e-112	1.58773e-108	0.914	0.796	C2 domain containing protein, putative	N/A
2	LmjF.11.0780	0.440159	4.95566e-129	4.05225e-125	0.943	0.857	40S ribosomal protein S21, putative	structural constituent of ribosome
2	LmjF.36.3270	0.439218	1.09156e-82	8.92572e-79	0.823	0.66	60S ribosomal protein L22, putative	structural constituent of ribosome
2	LmjF.36.5010	0.436757	3.02708e-97	2.47524e-93	0.877	0.728	40S ribosomal protein SA, putative	structural constituent of ribosome
2	LmjF.06.1260	0.435057	1.90718e-71	1.5595e-67	0.868	0.719	pteridine transporter, putative	N/A
2	LmjF.36.0600	0.433808	2.69637e-63	2.20482e-59	0.712	0.518	ubiquitin/ribosomal protein S27a, putative	protein binding;structural constituent of ribosome
2	LmjF.27.0670	0.431064	2.29705e-102	1.8783e-98	0.385	0.181	amino acid permease, putative	N/A
2	LmjF.33.3150	0.428592	4.87443e-60	3.98582e-56	0.694	0.497	40S ribosomal protein S13, putative	structural constituent of ribosome
2	LmjF.16.0600	0.426697	5.43816e-111	4.44678e-107	0.929	0.853	histone H3, putative	DNA binding;protein heterodimerization activity
2	LmjF.36.0940	0.421163	2.58891e-104	2.11696e-100	0.338	0.148	40S ribosomal protein S18, putative	RNA binding;nucleic acid binding;structural constituent of ribosome
2	LmjF.05.0580	0.420806	7.86343e-92	6.42993e-88	0.41	0.205	hypothetical protein, conserved	N/A
2	LmjF.04.1020	0.420129	3.57527e-99	2.9235e-95	0.898	0.741	hypothetical protein, conserved	N/A
[truncated: 2,467 more rows]

## Sheet: top10_L747
L747_Cluster_ID	Gene_ID	Avg_log2FC	P_value	P_val_adj	Pct.1	Pct.2	Product_Description	Computed_GO_Functions
[truncated: 70 more rows]

[truncated: 3 more sheets: top10_MA37, L747_hap2_pos_cluster2_markers, MA37_hap2_pos_cluster1_markers]
